# Supplementary material
Source: MDPI journal article supplement (https://www.mdpi.com/1424-8247/14/10/1032)

## Supplementary Materials:

# Mechanistic Insights into Binding of Ligands with Thiazolidinedione warhead to human histone deacetylase 4

*Markus Schweipert,<sup>1‡</sup> Niklas Jänsch,<sup>1‡</sup> Kalpana Tilekar,<sup>2\*</sup> Neha Upadhyay,<sup>2\*</sup> Ewelina Wozny,<sup>1</sup> Sidra Basheer,<sup>1</sup> Eva Wurster,<sup>1</sup> Marlene Müller,<sup>1</sup> C. S. Ramaa,<sup>2\*</sup> Franz-Josef Meyer-Almes<sup>1\*</sup>*

<sup>1</sup>Department of Chemical Engineering and Biotechnology, University of Applied Sciences, 64295 Darmstadt, Germany

<sup>2</sup>Department of Pharmaceutical Chemistry, Bharati Vidyapeeth's College of Pharmacy, Navi Mumbai, India

<sup>‡</sup>These Authors contributed equally

\*Corresponding authors: franz-josef.meyer-almes@h-da.de, sinharamaa@yahoo.in

## Table of contents:

|                                                                                                                                  |        |
|----------------------------------------------------------------------------------------------------------------------------------|--------|
| • Tab. S1: SMILES Strings and IC <sub>50</sub> -values of all tested TZD ligands,                                                | 2-9    |
| • Fig. S1: Determination of Michaelis-Menten Paramters,                                                                          | 10     |
| • Fig. S2: Kinetic data plots of TZD ligands,                                                                                    | 11     |
| • Tab. S2: IC <sub>50</sub> -values in $\mu$ M for indicated TZD ligands towards cdHDAC4 <sub>wt</sub> and corresponding mutants | 12     |
| • Fig. S3: Overlay of crystallized and redocked ligands                                                                          | 13     |
| • Fig. S4: Regions of largest structural shifts for the transition from <i>closed</i> to <i>open</i> conformation of HDAC4       | 14     |
| • Fig. S5: Overlay of HDAC4c and HDAC4o showing the amino acids that are mutated                                                 | 15     |
| • Fig. S6: The distance between C $\beta$ -atoms is plotted versus the number of the mutated amino acids                         | 16     |
| • Fig. S7: Cluster analysis of most active TZD analogs                                                                           | 17     |
| • Fig. S8: Overlap of docking poses of TZD analogs to A)-C) HDAC4c and D)-F) HDAC4o                                              | 18     |
| • Tab. S3: Open reading frame of cdHDAC4 <sub>wt</sub> in pET14b for recombinant protein expression                              | 19     |
| • Tab. S4: Mutant to cdHDAC4 <sub>wt</sub> (WT) IC <sub>50</sub> ratios                                                          | 20-21  |
| • Structural characterization of synthesized compounds (NMR, MS, FTIR, UV, HPLC)                                                 | 22-268 |

**Tab. S1: SMILES Strings and IC<sub>50</sub>-values of all tested TZD ligands.**

| Ligand Name | IC <sub>50</sub> / $\mu$ M | Smiles Code                                                                                     |
|-------------|----------------------------|-------------------------------------------------------------------------------------------------|
| 8b          | 0,33                       | <chem>O=C(COc1cc2ccc(/C=C(/C(N3)=O)\SC3=O)cc2cc1)N(C(C1)c(cccc2)c2Cl)N=C1c1ccccc1</chem>        |
| 8i          | 0,34                       | <chem>O=C(COc1ccc(cc(/C=C(/C(N2)=O)\SC2=O)cc2)c2c1)N(C(C1)c2cccs2)N=C1c1ccccc1</chem>           |
| 16b         | 0,42                       | <chem>O=C(COc1cc2ccc(/C=C(/C(N3)=O)\SC3=O)cc2cc1)N(C(C1)c(cccc2)c2Cl)N=C1c(cc1)ccc1F</chem>     |
| 16g         | 0,46                       | <chem>Cc1ccc(C(C2)N(C(COc3ccc(cc(/C=C(/C(N4)=O)\SC4=O)cc4)c4c3)=O)N=C2c(cc2)ccc2F)cc1</chem>    |
| 7l          | 0,54                       | <chem>Cc(cc(cc1)Br)c1NC(COc1cc2ccc(/C=C(/C(N3)=O)\SC3=O)cc2cc1)=O</chem>                        |
| 4j          | 0,67                       | <chem>O=C(COc1ccc(/C=C(/C(N2)=O)\SC2=O)cc1)N(C(C1)c(cc2)cc(Cl)c2Cl)N=C1c1ccccc1</chem>          |
| 24g         | 0,71                       | <chem>Cc1ccc(C(C2)N(C(COc3ccc(cc(/C=C(/C(N4)=O)\SC4=O)cc4)c4c3)=O)N=C2c(ccc(F)c2)c2F)cc1</chem> |
| 24e         | 0,73                       | <chem>O=C(COc1ccc(cc(/C=C(/C(N2)=O)\SC2=O)cc2)c2c1)N(C(C1)c(cc2)ccc2F)N=C1c(ccc(F)c1)c1F</chem> |
| 8g          | 0,76                       | <chem>Cc1ccc(C(C2)N(C(COc3ccc(cc(/C=C(/C(N4)=O)\SC4=O)cc4)c4c3)=O)N=C2c2ccccc2)cc1</chem>       |
| 8a          | 0,77                       | <chem>O=C(COc1ccc(cc(/C=C(/C(N2)=O)\SC2=O)cc2)c2c1)N(C(C1)c2ccccc2)N=C1c1ccccc1</chem>          |
| 7s          | 0,78                       | <chem>O=C(COc1ccc(cc(/C=C(/C(N2)=O)\SC2=O)cc2)c2c1)Nc1ncccc1F</chem>                            |
| 4d          | 0,79                       | <chem>O=C(COc1ccc(/C=C(/C(N2)=O)\SC2=O)cc1)N(C(C1)c2ccc(C(F)(F)F)cc2)N=C1c1ccccc1</chem>        |
| 12j         | 0,83                       | <chem>O=C(COc1ccc(/C=C(/C(N2)=O)\SC2=O)cc1)N(C(C1)c(cc2)cc(Cl)c2Cl)N=C1c(cc1)ccc1F</chem>       |
| 5w          | 0,90                       | <chem>O=C(COc1ncc(/C=C(/C(N2)=O)\SC2=O)cc1)Nc1nc(cccc2)c2s1</chem>                              |

|     |     |                                                                                                |
|-----|-----|------------------------------------------------------------------------------------------------|
| 20e | 1,0 | <chem>O=C(COC1ccc(/C=C(/C(N2)=O)\SC2=O)cc1)N(C(C1)c(cc2)ccc2F)N=C1c(ccc(F)c1)c1F</chem>        |
| 8e  | 1,1 | <chem>O=C(COC1ccc(cc(/C=C(/C(N2)=O)\SC2=O)cc2)c2c1)N(C(C1)c(cc2)ccc2F)N=C1c1ccccc1</chem>      |
| 16a | 1,1 | <chem>O=C(COC1ccc(cc(/C=C(/C(N2)=O)\SC2=O)cc2)c2c1)N(C(C1)c2ccccc2)N=C1c(cc1)ccc1F</chem>      |
| 8c  | 1,2 | <chem>O=C(COC1ccc(cc(/C=C(/C(N2)=O)\SC2=O)cc2)c2c1)N(C(C1)c2ccco2)N=C1c1ccccc1</chem>          |
| 7x  | 1,2 | <chem>Cc1cccc2c1nc(NC(COC1cc3ccc(/C=C(/C(N4)=O)\SC4=O)cc3cc1)=O)s2</chem>                      |
| 16e | 1,3 | <chem>O=C(COC1ccc(cc(/C=C(/C(N2)=O)\SC2=O)cc2)c2c1)N(C(C1)c(cc2)ccc2F)N=C1c(cc1)ccc1F</chem>   |
| 7i  | 1,3 | <chem>O=C(COC1cc2ccc(/C=C(/C(N3)=O)\SC3=O)cc2cc1)Nc(c(F)cc(F)c1)c1Br</chem>                    |
| 4k  | 1,4 | <chem>O=C(COC1ccc(/C=C(/C(N2)=O)\SC2=O)cc1)N(C(C1)c(cc2)ccc2Br)N=C1c1ccccc1</chem>             |
| 16c | 1,4 | <chem>O=C(COC1ccc(cc(/C=C(/C(N2)=O)\SC2=O)cc2)c2c1)N(C(C1)c2ccco2)N=C1c(cc1)ccc1F</chem>       |
| 22g | 1,5 | <chem>Cc1ccc(C(C2)N(C(COc3ccc(/C=C(/C(N4)=O)\SC4=O)cc3)=O)N=C2c(ccc(F)c2)c2F)cc1</chem>        |
| 12d | 1,5 | <chem>O=C(COC1ccc(/C=C(/C(N2)=O)\SC2=O)cc1)N(C(C1)c2ccc(C(F)(F)F)cc2)N=C1c(cc1)ccc1F</chem>    |
| 12a | 1,6 | <chem>O=C(COC1ccc(/C=C(/C(N2)=O)\SC2=O)cc1)N(C(C1)c2ccccc2)N=C1c(cc1)ccc1F</chem>              |
| 7w  | 1,6 | <chem>O=C(COC1cc2ccc(/C=C(/C(N3)=O)\SC3=O)cc2cc1)Nc1nc(cccc2)c2s1</chem>                       |
| 12f | 1,6 | <chem>O=C(COC1ccc(/C=C(/C(N2)=O)\SC2=O)cc1)N(C(C1)c(ccc(F)c2)c2F)N=C1c(cc1)ccc1F</chem>        |
| 4g  | 1,8 | <chem>Cc1ccc(C(C2)N(C(COc3ccc(/C=C(/C(N4)=O)\SC4=O)cc3)=O)N=C2c2ccccc2)cc1</chem>              |
| 12g | 1,8 | <chem>Cc1ccc(C(C2)N(C(COc3ccc(/C=C(/C(N4)=O)\SC4=O)cc3)=O)N=C2c(cc2)ccc2F)cc1</chem>           |
| 7q  | 1,8 | <chem>[O-][N+](c(cc1)ccc1NC(COC1ccc(cc(/C=C(/C(N2)=O)\SC2=O)cc2)c2c1)=O)=O</chem>              |
| 4b  | 1,9 | <chem>O=C(COC1ccc(/C=C(/C(N2)=O)\SC2=O)cc1)N(C(C1)c(cccc2)c2Cl)N=C1c1ccccc1</chem>             |
| 22d | 1,9 | <chem>O=C(COC1ncc(/C=C(/C(N2)=O)\SC2=O)cc1)N(C(C1)c2ccc(C(F)(F)F)cc2)N=C1c(ccc(F)c1)c1F</chem> |
| 5z  | 2,1 | <chem>[O-][N+](c(cc1)cc2c1nc(NC(COc1ncc(/C=C(/C(N3)=O)\SC3=O)cc1)=O)s2)=O</chem>               |
| 14d | 2,2 | <chem>O=C(COC1ncc(/C=C(/C(N2)=O)\SC2=O)cc1)N(C(C1)c2ccc(C(F)(F)F)cc2)N=C1c(cc1)ccc1F</chem>    |
| 7g  | 2,2 | <chem>COc1cccc(NC(COc2ccc(cc(/C=C(/C(N3)=O)\SC3=O)cc3)c3c2)=O)c1</chem>                        |
| 12e | 2,3 | <chem>O=C(COC1ccc(/C=C(/C(N2)=O)\SC2=O)cc1)N(C(C1)c(cc2)ccc2F)N=C1c(cc1)ccc1F</chem>           |
| 14b | 2,3 | <chem>O=C(COC1ncc(/C=C(/C(N2)=O)\SC2=O)cc1)N(C(C1)c(cccc2)c2Cl)N=C1c(cc1)ccc1F</chem>          |
| 4f  | 2,5 | <chem>O=C(COC1ccc(/C=C(/C(N2)=O)\SC2=O)cc1)N(C(C1)c(ccc(F)c2)c2F)N=C1c1ccccc1</chem>           |
| 7u  | 2,9 | <chem>Cc(ccc(NC(COC1cc2ccc(/C=C(/C(N3)=O)\SC3=O)cc2cc1)=O)c1)c1Cl</chem>                       |
| 4e  | 2,9 | <chem>O=C(COC1ccc(/C=C(/C(N2)=O)\SC2=O)cc1)N(C(C1)c(cc2)ccc2F)N=C1c1ccccc1</chem>              |
| 7o  | 2,9 | <chem>O=C(COC1cc2ccc(/C=C(/C(N3)=O)\SC3=O)cc2cc1)Nc(cc1)ccc1Br</chem>                          |
| 7n  | 3,1 | <chem>Cc1cccnc1NC(COC1ccc(cc(/C=C(/C(N2)=O)\SC2=O)cc2)c2c1)=O</chem>                           |
| 22f | 3,4 | <chem>O=C(COC1ncc(/C=C(/C(N2)=O)\SC2=O)cc1)N(C(C1)c(ccc(F)c2)c2F)N=C1c(ccc(F)c1)c1F</chem>     |

|     |     |                                                                                              |
|-----|-----|----------------------------------------------------------------------------------------------|
| 5y  | 3,4 | <chem>CCOc(cc1)cc2c1nc(NC(COc1ncc(/C=C(/C(N3)=O)\SC3=O)cc1)=O)s2</chem>                      |
| 7p  | 3,5 | <chem>O=C(COc1cc2ccc(/C=C(/C(N3)=O)\SC3=O)cc2cc1)Nc1cc(C(F)(F)F)cc(Cl)c1</chem>              |
| 7b  | 3,6 | <chem>O=C(COc1ccc(cc(/C=C(/C(N2)=O)\SC2=O)cc2)c2c1)Nc(cc1)ccc1F</chem>                       |
| 7y  | 3,6 | <chem>CCOc(cc1)cc2c1nc(NC(COc1cc3ccc(/C=C(/C(N4)=O)\SC4=O)cc3cc1)=O)s2</chem>                |
| 14e | 3,8 | <chem>O=C(COc1ncc(/C=C(/C(N2)=O)\SC2=O)cc1)N(C(C1)c(cc2)ccc2F)N=C1c(cc1)ccc1F</chem>         |
| 7a  | 3,9 | <chem>O=C(COc1ccc(cc(/C=C(/C(N2)=O)\SC2=O)cc2)c2c1)Nc1ccccc1</chem>                          |
| 7j  | 4,0 | <chem>O=C(COc1ccc(cc(/C=C(/C(N2)=O)\SC2=O)cc2)c2c1)Nc(cccc1)c1Oc1ccccc1</chem>               |
| 6e  | 4,2 | <chem>O=C(COc1ncc(/C=C(/C(N2)=O)\SC2=O)cc1)N(C(C1)c(cc2)ccc2F)N=C1c1ccccc1</chem>            |
| 5x  | 4,3 | <chem>Cc1ccc2c1nc(NC(COc1ncc(/C=C(/C(N3)=O)\SC3=O)cc1)=O)s2</chem>                           |
| 6h  | 4,3 | <chem>[O-][N+](c1cccc(C(C2)N(C(COc3ncc(/C=C(/C(N4)=O)\SC4=O)cc3)=O)N=C2c2ccccc2)c1)=O</chem> |
| 7t  | 4,4 | <chem>Cc1cc(NC(COc2ccc(cc(/C=C(/C(N3)=O)\SC3=O)cc3)c3c2)=O)no1</chem>                        |
| 7c  | 4,5 | <chem>Cc(cc1)ccc1NC(COc1ccc(cc(/C=C(/C(N2)=O)\SC2=O)cc2)c2c1)=O</chem>                       |
| 7r  | 4,6 | <chem>O=C(COc1ccc(cc(/C=C(/C(N2)=O)\SC2=O)cc2)c2c1)Nc(ccc(S)c1)c1F</chem>                    |
| 14c | 4,7 | <chem>O=C(COc1ncc(/C=C(/C(N2)=O)\SC2=O)cc1)N(C(C1)c2ccco2)N=C1c(cc1)ccc1F</chem>             |
| 7e  | 4,8 | <chem>O=C(COc1ccc(cc(/C=C(/C(N2)=O)\SC2=O)cc2)c2c1)Nc1cc(C(F)(F)F)ccc1</chem>                |
| 5o  | 5,0 | <chem>O=C(COc1ncc(/C=C(/C(N2)=O)\SC2=O)cc1)Nc(cc1)ccc1Br</chem>                              |
| 7v  | 5,2 | <chem>O=C(COc1cc2ccc(/C=C(/C(N3)=O)\SC3=O)cc2cc1)Nc(cc1)cc(Br)c1Br</chem>                    |
| 22e | 5,2 | <chem>O=C(COc1ncc(/C=C(/C(N2)=O)\SC2=O)cc1)N(C(C1)c(cc2)ccc2F)N=C1c(ccc(F)c1)c1F</chem>      |
| 6d  | 5,3 | <chem>O=C(COc1ncc(/C=C(/C(N2)=O)\SC2=O)cc1)N(C(C1)c2ccc(C(F)(F)F)cc2)N=C1c1ccccc1</chem>     |
| 22b | 5,6 | <chem>O=C(COc1ncc(/C=C(/C(N2)=O)\SC2=O)cc1)N(C(C1)c(cccc2)c2Cl)N=C1c(ccc(F)c1)c1F</chem>     |
| 6a  | 5,7 | <chem>O=C(COc1ncc(/C=C(/C(N2)=O)\SC2=O)cc1)N(C(C1)c2ccccc2)N=C1c1ccccc1</chem>               |
| 5h  | 5,7 | <chem>O=C(COc1ncc(/C=C(/C(N2)=O)\SC2=O)cc1)Nc(cc1)cc(Cl)c1Cl</chem>                          |
| 14f | 5,8 | <chem>O=C(COc1ncc(/C=C(/C(N2)=O)\SC2=O)cc1)N(C(C1)c(ccc(F)c2)c2F)N=C1c(cc1)ccc1F</chem>      |
| 6i  | 5,9 | <chem>O=C(COc1ncc(/C=C(/C(N2)=O)\SC2=O)cc1)N(C(C1)c2cccs2)N=C1c1ccccc1</chem>                |
| 7h  | 6,2 | <chem>O=C(COc1cc2ccc(/C=C(/C(N3)=O)\SC3=O)cc2cc1)Nc(cc1)cc(Cl)c1Cl</chem>                    |
| 6b  | 6,3 | <chem>O=C(COc1ncc(/C=C(/C(N2)=O)\SC2=O)cc1)N(C(C1)c(cccc2)c2Cl)N=C1c1ccccc1</chem>           |
| 5v  | 7,0 | <chem>O=C(COc1ncc(/C=C(/C(N2)=O)\SC2=O)cc1)Nc(cc1)cc(Br)c1Br</chem>                          |
| 12c | 7,0 | <chem>O=C(COc1ccc(/C=C(/C(N2)=O)\SC2=O)cc1)N(C(C1)c2ccco2)N=C1c(cc1)ccc1F</chem>             |
| 12b | 8,0 | <chem>O=C(COc1ccc(/C=C(/C(N2)=O)\SC2=O)cc1)N(C(C1)c(cccc2)c2Cl)N=C1c(cc1)ccc1F</chem>        |
| 22c | 8,1 | <chem>O=C(COc1ncc(/C=C(/C(N2)=O)\SC2=O)cc1)N(C(C1)c2ccco2)N=C1c(ccc(F)c1)c1F</chem>          |
| 5u  | 8,4 | <chem>Cc1cc(Cl)cc(NC(COc2ncc(/C=C(/C(N3)=O)\SC3=O)cc2)=O)c1</chem>                           |



|      |      |                                                                                    |
|------|------|------------------------------------------------------------------------------------|
| 7k   | 8,4  | <chem>O=C(COc1ccc(cc/C=C/C(N2)=O)/SC2=O)cc2)c2c1)Nc(ccc(F)c1)c1F</chem>            |
| 6f   | 8,9  | <chem>O=C(COc1ncc(/C=C/C(N2)=O)\SC2=O)cc1)N(C(C1)c(ccc(F)c2)c2F)N=C1c1cccc1</chem> |
| 7f   | 9,4  | <chem>O=C(COc1cc2ccc(/C=C/C(N3)=O)\SC3=O)cc2cc1)Nc1cccc(Cl)c1</chem>               |
| 5f   | 11   | <chem>O=C(COc1ncc(/C=C/C(N2)=O)\SC2=O)cc1)Nc1cccc(Cl)c1</chem>                     |
| 4a   | 12   | <chem>O=C(COc1ccc(/C=C/C(N2)=O)\SC2=O)cc1)N(C(C1)c2cccc2)N=C1c1cccc1</chem>        |
| 5c   | 12   | <chem>Cc(cc1)ccc1NC(COc1ncc(/C=C/C(N2)=O)\SC2=O)cc1)=O</chem>                      |
| 5e   | 13   | <chem>O=C(COc1ncc(/C=C/C(N2)=O)\SC2=O)cc1)Nc1cc(C(F)(F)F)ccc1</chem>               |
| 3k   | 15   | <chem>[O-][N+](c(cc1)ccc1NC(COc1c(/C=C/C(N2)=O)\SC2=O)c2cccc2cc1)=O)=O</chem>      |
| 20c  | 15   | <chem>O=C(COc1ccc(/C=C/C(N2)=O)\SC2=O)cc1)N(C(C1)c2ccco2)N=C1c(ccc(F)c1)c1F</chem> |
| 5r   | 15   | <chem>O=C(COc1ncc(/C=C/C(N2)=O)\SC2=O)cc1)Nc(ccc(Br)c1)c1F</chem>                  |
| 5k   | 19   | <chem>O=C(COc1ncc(/C=C/C(N2)=O)\SC2=O)cc1)Nc(ccc(F)c1)c1F</chem>                   |
| 5s   | 19   | <chem>O=C(COc1ncc(/C=C/C(N2)=O)\SC2=O)cc1)Nc1ncccc1F</chem>                        |
| 7m   | 20   | <chem>O=C(COc1ccc(cc/C=C/C(N2)=O)\SC2=O)cc2)c2c1)Nc1ncccc1</chem>                  |
| 14a  | 21   | <chem>O=C(COc1ncc(/C=C/C(N2)=O)\SC2=O)cc1)N(C(C1)c2cccc2)N=C1c(cc1)ccc1F</chem>    |
| 5n   | 21   | <chem>Cc1cccnc1NC(COc1ncc(/C=C/C(N2)=O)\SC2=O)cc1)=O</chem>                        |
| 5m   | 22   | <chem>O=C(COc1ncc(/C=C/C(N2)=O)\SC2=O)cc1)Nc1ncccc1</chem>                         |
| 5d   | 25   | <chem>COc(cc1)ccc1NC(COc1ncc(/C=C/C(N2)=O)\SC2=O)cc1)=O</chem>                     |
| 5p   | 34   | <chem>O=C(COc1ncc(/C=C/C(N2)=O)\SC2=O)cc1)Nc(c(C(F)(F)F)ccc1)c1Cl</chem>           |
| GB24 | 35   | <chem>Cc(c(C)c1)cc2c1sc(NC(CN(C(/C(/S1)=C/c(cc3)ccc3Cl)=O)C1=O)=O)n2</chem>        |
| P10  | 43   | <chem>CC(N(C)N(C1=O)c2cccc2)=C1NC(CN(C(/C(/S1)=C/c2ncccc2)=O)C1=O)=O</chem>        |
| 3a   | > 50 | <chem>O=C(COc1c(/C=C/C(N2)=O)\SC2=O)c2cccc2cc1)Nc1cccc1</chem>                     |
| 3b   | > 50 | <chem>O=C(COc1c(/C=C/C(N2)=O)\SC2=O)c2cccc2cc1)Nc(cc1)ccc1F</chem>                 |
| 3c   | > 50 | <chem>Cc(cc1)ccc1NC(COc1c(/C=C/C(N2)=O)\SC2=O)c2cccc2cc1)=O</chem>                 |
| 3d   | > 50 | <chem>COc(cc1)ccc1NC(COc1c(/C=C/C(N2)=O)\SC2=O)c2cccc2cc1)=O</chem>                |
| 3e   | > 50 | <chem>O=C(COc1c(/C=C/C(N2)=O)\SC2=O)c2cccc2cc1)Nc(cc1)cc(Cl)c1Cl</chem>            |
| 3f   | > 50 | <chem>O=C(COc1c(/C=C/C(N2)=O)\SC2=O)c2cccc2cc1)Nc(c(F)cc(F)c1)c1Br</chem>          |
| 3g   | > 50 | <chem>O=C(COc1c(/C=C/C(N2)=O)\SC2=O)c2cccc2cc1)Nc(ccc(F)c1)c1F</chem>              |
| 3h   | > 50 | <chem>Cc(cc(cc1)Br)c1NC(COc1c(/C=C/C(N2)=O)\SC2=O)c2cccc2cc1)=O</chem>             |
| 3i   | > 50 | <chem>O=C(COc1c(/C=C/C(N2)=O)\SC2=O)c2cccc2cc1)Nc(cc1)ccc1Br</chem>                |
| 3j   | > 50 | <chem>O=C(COc1c(/C=C/C(N2)=O)\SC2=O)c2cccc2cc1)Nc1cc(C(F)(F)F)ccc1</chem>          |
| 5a   | > 50 | <chem>O=C(COc1ncc(/C=C/C(N2)=O)\SC2=O)cc1)Nc1cccc1</chem>                          |

|     |      |                                                                           |
|-----|------|---------------------------------------------------------------------------|
| 5b  | > 50 | <chem>O=C(COc1ncc(/C=C(/C(N2)=O)\SC2=O)cc1)Nc(cc1)ccc1F</chem>            |
| 5g  | > 50 | <chem>COc1cccc(NC(COc2ncc(/C=C(/C(N3)=O)\SC3=O)cc2)=O)c1</chem>           |
| 5i  | > 50 | <chem>O=C(COc1ncc(/C=C(/C(N2)=O)\SC2=O)cc1)Nc(c(F)cc(F)c1)c1Br</chem>     |
| 5j  | > 50 | <chem>Cc1ncc(NC(COc2ncc(/C=C(/C(N3)=O)\SC3=O)cc2)=O)s1</chem>             |
| 5l  | > 50 | <chem>Cc(cc(cc1)Br)c1NC(COc1ncc(/C=C(/C(N2)=O)\SC2=O)cc1)=O</chem>        |
| 5q  | > 50 | <chem>[O-][N+](c(cc1)ccc1NC(COc1ncc(/C=C(/C(N2)=O)\SC2=O)cc1)=O)=O</chem> |
| 5t  | > 50 | <chem>Cc1cc(NC(COc2ncc(/C=C(/C(N3)=O)\SC3=O)cc2)=O)no1</chem>             |
| 7d  | > 50 | <chem>COc(cc1)ccc1NC(COc1ccc(cc1/C=C(/C(N2)=O)\SC2=O)cc2)c2c1)=O</chem>   |
| F1  | > 50 | <chem>O=C(CN(C(/C(/S1)=C/c2ccco2)=O)C1=O)Nc1cccc1</chem>                  |
| F10 | > 50 | <chem>O=C(CN(C(/C(/S1)=C/c2ccco2)=O)C1=O)Nc(cc(C(F)(F)F)cc1)c1Cl</chem>   |
| F11 | > 50 | <chem>O=C(CN(C(/C(/S1)=C/c2ccco2)=O)C1=O)Nc(ccc(Br)c1)c1F</chem>          |
| F12 | > 50 | <chem>COc(cc1)ccc1NC(CN(C(/C(/S1)=C/c2ccco2)=O)C1=O)=O</chem>             |
| F13 | > 50 | <chem>O=C(CN(C(/C(/S1)=C/c2ccco2)=O)C1=O)Nc(cc1)ccc1F</chem>              |
| F14 | > 50 | <chem>[O-][N+](c(cc1)ccc1NC(CN(C(/C(/S1)=C/c2ccco2)=O)C1=O)=O)=O</chem>   |
| F15 | > 50 | <chem>Cc1cc(NC(CN(C(/C(/S2)=C/c3ccco3)=O)C2=O)=O)no1</chem>               |
| F16 | > 50 | <chem>O=C(CN(C(/C(/S1)=C/c2ccco2)=O)C1=O)Nc1nccs1</chem>                  |
| F17 | > 50 | <chem>Cc(ccc(NC(CN(C(/C(/S1)=C/c2ccco2)=O)C1=O)=O)c1)c1Cl</chem>          |
| F18 | > 50 | <chem>O=C(CN(C(/C(/S1)=C/c2ccco2)=O)C1=O)Nc1nc(cccc2)c2s1</chem>          |
| F19 | > 50 | <chem>O=C(CN(C(/C(/S1)=C/c2ccco2)=O)C1=O)Nc(cc1)cc(Cl)c1Cl</chem>         |
| F2  | > 50 | <chem>O=C(CN(C(/C(/S1)=C/c2ccco2)=O)C1=O)Nc(cccc1)c1F</chem>              |
| F21 | > 50 | <chem>O=C(CN(C(/C(/S1)=C/c2ccco2)=O)C1=O)Nc(cc1)ccc1Br</chem>             |
| F22 | > 50 | <chem>O=C(CN(C(/C(/S1)=C/c2ccco2)=O)C1=O)Nc1ncccc1</chem>                 |
| F23 | > 50 | <chem>Cc(cc1)ccc1NC(CN(C(/C(/S1)=C/c2ccco2)=O)C1=O)=O</chem>              |
| F24 | > 50 | <chem>O=C(CN(C(/C(/S1)=C/c2ccco2)=O)C1=O)Nc(cc1)cc(Br)c1Br</chem>         |
| F25 | > 50 | <chem>Cc1csc(NC(CN(C(/C(/S2)=C/c3ccco3)=O)C2=O)=O)n1</chem>               |
| F3  | > 50 | <chem>O=C(CN(C(/C(/S1)=C/c2ccco2)=O)C1=O)Nc1cc(F)ccc1</chem>              |
| F4  | > 50 | <chem>O=C(CN(C(/C(/S1)=C/c2ccco2)=O)C1=O)Nc(c(F)cc(Br)c1)c1F</chem>       |
| F5  | > 50 | <chem>O=C(CN(C(/C(/S1)=C/c2ccco2)=O)C1=O)Nc(ccc(F)c1)c1F</chem>           |
| F6  | > 50 | <chem>O=C(CN(C(/C(/S1)=C/c2ccco2)=O)C1=O)Nc1cc(C(F)(F)F)ccc1</chem>       |
| F7  | > 50 | <chem>O=C(CN(C(/C(/S1)=C/c2ccco2)=O)C1=O)Nc(cc1)c(C(F)(F)F)cc1Cl</chem>   |
| F8  | > 50 | <chem>O=C(CN(C(/C(/S1)=C/c2ccco2)=O)C1=O)Nc(cc1)c(C(F)(F)F)cc1Cl</chem>   |

|      |      |                                                                               |
|------|------|-------------------------------------------------------------------------------|
| F9   | > 50 | <chem>O=C(CN(C/C(/S1)=C/c2ccco2)=O)C1=O)Nc(cc1)ccc1Oc1ccccc1</chem>           |
| G1   | > 50 | <chem>O=C(CN(C/C(/S1)=C/c(cc2)ccc2Br)=O)C1=O)Nc(cc1)c(C(F)(F)F)cc1Cl</chem>   |
| G10  | > 50 | <chem>O=C(CN(C/C(/S1)=C/c(cc2)ccc2F)=O)C1=O)Nc(ccc(F)c1)c1F</chem>            |
| G11  | > 50 | <chem>Cc1ccc/C=C/C(N2CC(Nc(cc3)c(C(F)(F)F)cc3Cl)=O)=O)\SC2=O)cc1</chem>       |
| G12  | > 50 | <chem>Cc1ccc/C=C/C(N2CC(Nc(ccc(F)c3)c3F)=O)=O)\SC2=O)cc1</chem>               |
| G13  | > 50 | <chem>O=C(CN(C/C(/S1)=C/c2ccccc2)=O)C1=O)Nc(cc1)c(C(F)(F)F)cc1Cl</chem>       |
| G14  | > 50 | <chem>O=C(CN(C/C(/S1)=C/c2ccccc2)=O)C1=O)Nc(ccc(F)c1)c1F</chem>               |
| G15  | > 50 | <chem>O=C(CN(C/C(/S1)=C/c(ccc(F)c2)c2F)=O)C1=O)Nc1cc(C(F)(F)F)ccc1</chem>     |
| G16  | > 50 | <chem>O=C(CN(C/C(/S1)=C/c(cc2)ccc2F)=O)C1=O)Nc1cc(C(F)(F)F)ccc1</chem>        |
| G2   | > 50 | <chem>O=C(CN(C/C(/S1)=C/c(cc2)ccc2Br)=O)C1=O)Nc(ccc(F)c1)c1F</chem>           |
| G3   | > 50 | <chem>Cc1c(C)cc/C=C/C(N2CC(Nc(cc3)c(C(F)(F)F)cc3Cl)=O)=O)\SC2=O)cc1</chem>    |
| G4   | > 50 | <chem>Cc1c(C)cc/C=C/C(N2CC(Nc(ccc(F)c3)c3F)=O)=O)\SC2=O)cc1</chem>            |
| G5   | > 50 | <chem>O=C(CN(C/C(/S1)=C/c(cc2)ccc2Cl)=O)C1=O)Nc(cc1)c(C(F)(F)F)cc1Cl</chem>   |
| G6   | > 50 | <chem>O=C(CN(C/C(/S1)=C/c(cc2)ccc2Cl)=O)C1=O)Nc(ccc(F)c1)c1F</chem>           |
| G7   | > 50 | <chem>O=C(CN(C/C(/S1)=C/c(ccc(F)c2)c2F)=O)C1=O)Nc(cc1)c(C(F)(F)F)cc1Cl</chem> |
| G8   | > 50 | <chem>O=C(CN(C/C(/S1)=C/c(ccc(F)c2)c2F)=O)C1=O)Nc(ccc(F)c1)c1F</chem>         |
| G9   | > 50 | <chem>O=C(CN(C/C(/S1)=C/c(cc2)ccc2F)=O)C1=O)Nc(cc1)c(C(F)(F)F)cc1Cl</chem>    |
| GB01 | > 50 | <chem>O=C(CN(C/C(/S1)=C/c2ccccc2)=O)C1=O)Nc(sc1ccc2)nc1c2Cl</chem>            |
| GB02 | > 50 | <chem>Cc1ccc/C=C/C(N2CC(Nc(sc3ccc4)nc3c4Cl)=O)=O)\SC2=O)cc1</chem>            |
| GB03 | > 50 | <chem>O=C(CN(C/C(/S1)=C/c(cc2)ccc2Cl)=O)C1=O)Nc(sc1ccc2)nc1c2Cl</chem>        |
| GB04 | > 50 | <chem>O=C(CN(C/C(/S1)=C/c(cc2)ccc2Br)=O)C1=O)Nc1nc(c(Cl)ccc2)c2s1</chem>      |
| GB05 | > 50 | <chem>O=C(CN(C/C(/S1)=C/c(ccc(F)c2)c2F)=O)C1=O)Nc(sc1ccc2)nc1c2Cl</chem>      |
| GB06 | > 50 | <chem>Cc1c(C)cc/C=C/C(N2CC(Nc(sc3ccc4)nc3c4Cl)=O)=O)\SC2=O)cc1</chem>         |
| GB07 | > 50 | <chem>O=C(CN(C/C(/S1)=C/c(cc2)ccc2Br)=O)C1=O)Nc1nc(c(F)cc(F)c2)c2s1</chem>    |
| GB08 | > 50 | <chem>COc1cccc2c1nc(NC(CN(C/C(/S1)=C/c3ccccc3)=O)C1=O)=O)s2</chem>            |
| GB09 | > 50 | <chem>Cc1cccc2c1nc(NC(CN(C/C(/S1)=C/c3ccccc3)=O)C1=O)=O)s2</chem>             |
| GB10 | > 50 | <chem>Cc1cccc2c1nc(NC(CN(C/C(/S1)=C/c(cc3)ccc3F)=O)C1=O)=O)s2</chem>          |
| GB11 | > 50 | <chem>O=C(CN(C/C(/S1)=C/c(cc2)ccc2Cl)=O)C1=O)Nc1nc(c(F)cc(F)c2)c2s1</chem>    |
| GB12 | > 50 | <chem>O=C(CN(C/C(/S1)=C/c2ccccc2)=O)C1=O)Nc1nc(c(F)cc(F)c2)c2s1</chem>        |
| GB13 | > 50 | <chem>Cc(cc1)cc2c1nc(NC(CN(C/C(/S1)=C/c(ccc(F)c3)c3F)=O)C1=O)=O)s2</chem>     |
| GB14 | > 50 | <chem>Cc1ccc/C=C/C(N2CC(Nc3nc(ccc(C)c4)c4s3)=O)=O)\SC2=O)cc1</chem>           |

|      |      |                                                                             |
|------|------|-----------------------------------------------------------------------------|
| GB15 | > 50 | <chem>Cc(cc1)cc2c1nc(NC(CN(C(C/S1)=C/c3cc(C)c(C)cc3)=O)C1=O)=O)s2</chem>    |
| GB16 | > 50 | <chem>Cc(cc1)cc2c1nc(NC(CN(C(C/S1)=C/c(cc3)ccc3Cl)=O)C1=O)=O)s2</chem>      |
| GB17 | > 50 | <chem>CCOc(cc1)cc2c1nc(NC(CN(C(C/S1)=C/c(cc3)ccc3Cl)=O)C1=O)=O)s2</chem>    |
| GB18 | > 50 | <chem>O=C(CN(C(C/S1)=C/c(cc2)ccc2F)=O)C1=O)Nc1nc(c(F)cc(F)c2)c2s1</chem>    |
| GB19 | > 50 | <chem>Cc1ccc/C=C/C(N2CC(Nc3nc(c(F)cc(F)c4)c4s3)=O)=O)\SC2=O)cc1</chem>      |
| GB20 | > 50 | <chem>Cc1c(C)cc/C=C/C(N2CC(Nc3nc(c(F)cc(F)c4)c4s3)=O)=O)\SC2=O)cc1</chem>   |
| GB21 | > 50 | <chem>Cc1ccc/C=C/C(N2CC(Nc3nc(cc(C)c(C)c4)c4s3)=O)=O)\SC2=O)cc1</chem>      |
| GB23 | > 50 | <chem>Cc(c(C)c1)cc2c1sc(NC(CN(C(C/S1)=C/c(cc3)ccc3Br)=O)C1=O)=O)n2</chem>   |
| GB25 | > 50 | <chem>Cc(c(C)c1)cc2c1sc(NC(CN(C(C/S1)=C/c(cc3)ccc3F)=O)C1=O)=O)n2</chem>    |
| GB26 | > 50 | <chem>Cc1c(C)cc/C=C/C(N2CC(Nc3nc(cc(C)c(C)c4)c4s3)=O)=O)\SC2=O)cc1</chem>   |
| GB27 | > 50 | <chem>Cc1ccc/C=C/C(N2CC(Nc3nc(c(OC)ccc4)c4s3)=O)=O)\SC2=O)cc1</chem>        |
| GB28 | > 50 | <chem>Cc1cccc2c1nc(NC(CN(C(C/S1)=C/c3cccc3)=O)C1=O)=O)s2</chem>             |
| GB29 | > 50 | <chem>O=C(CN(C(C/S1)=C/c(ccc(F)c2)c2F)=O)C1=O)Nc1nc(c(F)cc(F)c2)c2s1</chem> |
| GB30 | > 50 | <chem>O=C(CN(C(C/S1)=C/c2cccc2)=O)C1=O)Nc1nc(c(F)ccc2)c2s1</chem>           |
| GB31 | > 50 | <chem>Cc(cc1)cc2c1nc(NC(CN(C(C/S1)=C/c(cc3)ccc3Br)=O)C1=O)=O)s2</chem>      |
| GB32 | > 50 | <chem>Cc1ccc/C=C/C(N2CC(Nc3nc(ccc(F)c4)c4s3)=O)=O)\SC2=O)cc1</chem>         |
| GB33 | > 50 | <chem>O=C(CN(C(C/S1)=C/c(cc2)ccc2Cl)=O)C1=O)Nc1nc(ccc(F)c2)c2s1</chem>      |
| GB34 | > 50 | <chem>O=C(CN(C(C/S1)=C/c(cc2)ccc2F)=O)C1=O)Nc1nc(ccc(F)c2)c2s1</chem>       |
| GB35 | > 50 | <chem>COc1cccc2c1nc(NC(CN(C(C/S1)=C/c(cc3)ccc3F)=O)C1=O)=O)s2</chem>        |
| GB36 | > 50 | <chem>CCOc(cc1)cc2c1nc(NC(CN(C(C/S1)=C/c3cccc3)=O)C1=O)=O)s2</chem>         |
| P1   | > 50 | <chem>O=C(CN(C(C/S1)=C/c2ncccc2)=O)C1=O)Nc1cccc1</chem>                     |
| P11  | > 50 | <chem>O=C(CN(C(C/S1)=C/c2ncccc2)=O)C1=O)Nc(cc1)ccc1F</chem>                 |
| P12  | > 50 | <chem>Cc(cc1)ccc1NC(CN(C(C/S1)=C/c2ncccc2)=O)C1=O)=O</chem>                 |
| P13  | > 50 | <chem>O=C(CN(C(C/S1)=C/c2ncccc2)=O)C1=O)Nc(cccc1)c1Oc1cccc1</chem>          |
| P14  | > 50 | <chem>COc(cc1)ccc1NC(CN(C(C/S1)=C/c2ncccc2)=O)C1=O)=O</chem>                |
| P15  | > 50 | <chem>O=C(CN(C(C/S1)=C/c2ncccc2)=O)C1=O)Nc(c(F)cc(Br)c1)c1F</chem>          |
| P16  | > 50 | <chem>[O-][N+](c(cc1)ccc1NC(CN(C(C/S1)=C/c2ncccc2)=O)C1=O)=O)=O</chem>      |
| P17  | > 50 | <chem>Cc(ccc(NC(CN(C(C/S1)=C/c2ncccc2)=O)C1=O)=O)c1)c1Cl</chem>             |
| P18  | > 50 | <chem>Cc1conc1NC(CN(C(C/S1)=C/c2ncccc2)=O)C1=O)=O</chem>                    |
| P19  | > 50 | <chem>O=C(CN(C(C/S1)=C/c2ncccc2)=O)C1=O)Nc1nc(cccc2)c2s1</chem>             |
| P2   | > 50 | <chem>O=C(CN(C(C/S1)=C/c2ncccc2)=O)C1=O)Nc(cccc1)c1F</chem>                 |

|      |      |                                                                                 |
|------|------|---------------------------------------------------------------------------------|
| P20  | > 50 | <chem>O=C(CN(C(/C(/S1)=C/c2ncccc2)=O)C1=O)Nc1nccs1</chem>                       |
| P21  | > 50 | <chem>Cc1cnc(NC(CN(C(/C(/S2)=C/c3ncccc3)=O)C2=O)=O)s1</chem>                    |
| P22  | > 50 | <chem>O=C(CN(C(/C(/S1)=C/c2ncccc2)=O)C1=O)Nc(cc1)ccc1Br</chem>                  |
| P23  | > 50 | <chem>O=C(CN(C(/C(/S1)=C/c2ncccc2)=O)C1=O)Nc1ncccc1</chem>                      |
| P24  | > 50 | <chem>COc1cccc(NC(CN(C(/C(/S2)=C/c3ncccc3)=O)C2=O)=O)c1</chem>                  |
| P25  | > 50 | <chem>O=C(CN(C(/C(/S1)=C/c2ncccc2)=O)C1=O)Nc(cc1)cc(Br)c1Br</chem>              |
| P3   | > 50 | <chem>O=C(CN(C(/C(/S1)=C/c2ncccc2)=O)C1=O)Nc1cc(F)ccc1</chem>                   |
| P4   | > 50 | <chem>O=C(CN(C(/C(/S1)=C/c2ncccc2)=O)C1=O)Nc(ccc(Br)c1)c1F</chem>               |
| P5   | > 50 | <chem>O=C(CN(C(/C(/S1)=C/c2ncccc2)=O)C1=O)Nc(ccc(F)c1)c1F</chem>                |
| P6   | > 50 | <chem>O=C(CN(C(/C(/S1)=C/c2ncccc2)=O)C1=O)Nc1cc(C(F)(F)F)ccc1</chem>            |
| P7   | > 50 | <chem>O=C(CN(C(/C(/S1)=C/c2ncccc2)=O)C1=O)Nc(cc1)c(C(F)(F)F)cc1Cl</chem>        |
| P8   | > 50 | <chem>O=C(CN(C(/C(/S1)=C/c2ncccc2)=O)C1=O)Nc(cc1)cc(Cl)c1Cl</chem>              |
| P9   | > 50 | <chem>O=C(CN(C(/C(/S1)=C/c2ncccc2)=O)C1=O)Nc(cc(C(F)(F)F)cc1)c1Cl</chem>        |
| PB01 | > 50 | <chem>[O-][N+](c(cc1)cc2c1nc(NC(CN(C(/C(/S1)=C/c3ncccc3)=O)C1=O)=O)s2)=O</chem> |
| PB02 | > 50 | <chem>Cc1cccc2c1nc(NC(CN(C(/C(/S1)=C/c3ncccc3)=O)C1=O)=O)s2</chem>              |
| PB05 | > 50 | <chem>O=C(CN(C(/C(/S1)=C/c2ncccc2)=O)C1=O)Nc1nc(cc(c(F)c2)F)c2s1</chem>         |
| PB07 | > 50 | <chem>COc1cccc2c1nc(NC(CN(C(/C(/S1)=C/c3ncccc3)=O)C1=O)=O)s2</chem>             |
| PB08 | > 50 | <chem>CCOc(cc1)cc2c1nc(NC(CN(C(/C(/S1)=C/c3ncccc3)=O)C1=O)=O)s2</chem>          |
| PB09 | > 50 | <chem>O=C(CN(C(/C(/S1)=C/c2ncccc2)=O)C1=O)Nc1nc(ccc(F)c2)c2s1</chem>            |
| F20  | > 50 | <chem>CC(N(C)N(C1=O)c2cccc2)=C1NC(CN(C(/C(/S1)=C/c2cccc2)=O)C1=O)=O</chem>      |
| GB22 | > 50 | <chem>Cc(c(C)c1)cc2c1sc(NC(CN(C(/C(/S1)=C/c3cccc3)=O)C1=O)=O)n2</chem>          |
| PB03 | > 50 | <chem>Cc(cc1)cc2c1nc(NC(CN(C(/C(/S1)=C/c3ncccc3)=O)C1=O)=O)s2</chem>            |
| PB04 | > 50 | <chem>O=C(CN(C(/C(/S1)=C/c2ncccc2)=O)C1=O)Nc(sc1ccc2)nc1c2Cl</chem>             |
| PB06 | > 50 | <chem>Cc(c(C)c1)cc2c1sc(NC(CN(C(/C(/S1)=C/c3ncccc3)=O)C1=O)=O)n2</chem>         |
| SAHA | 40   | <chem>ONC(CCCCCC(Nc1cccc1)=O)=O</chem>                                          |

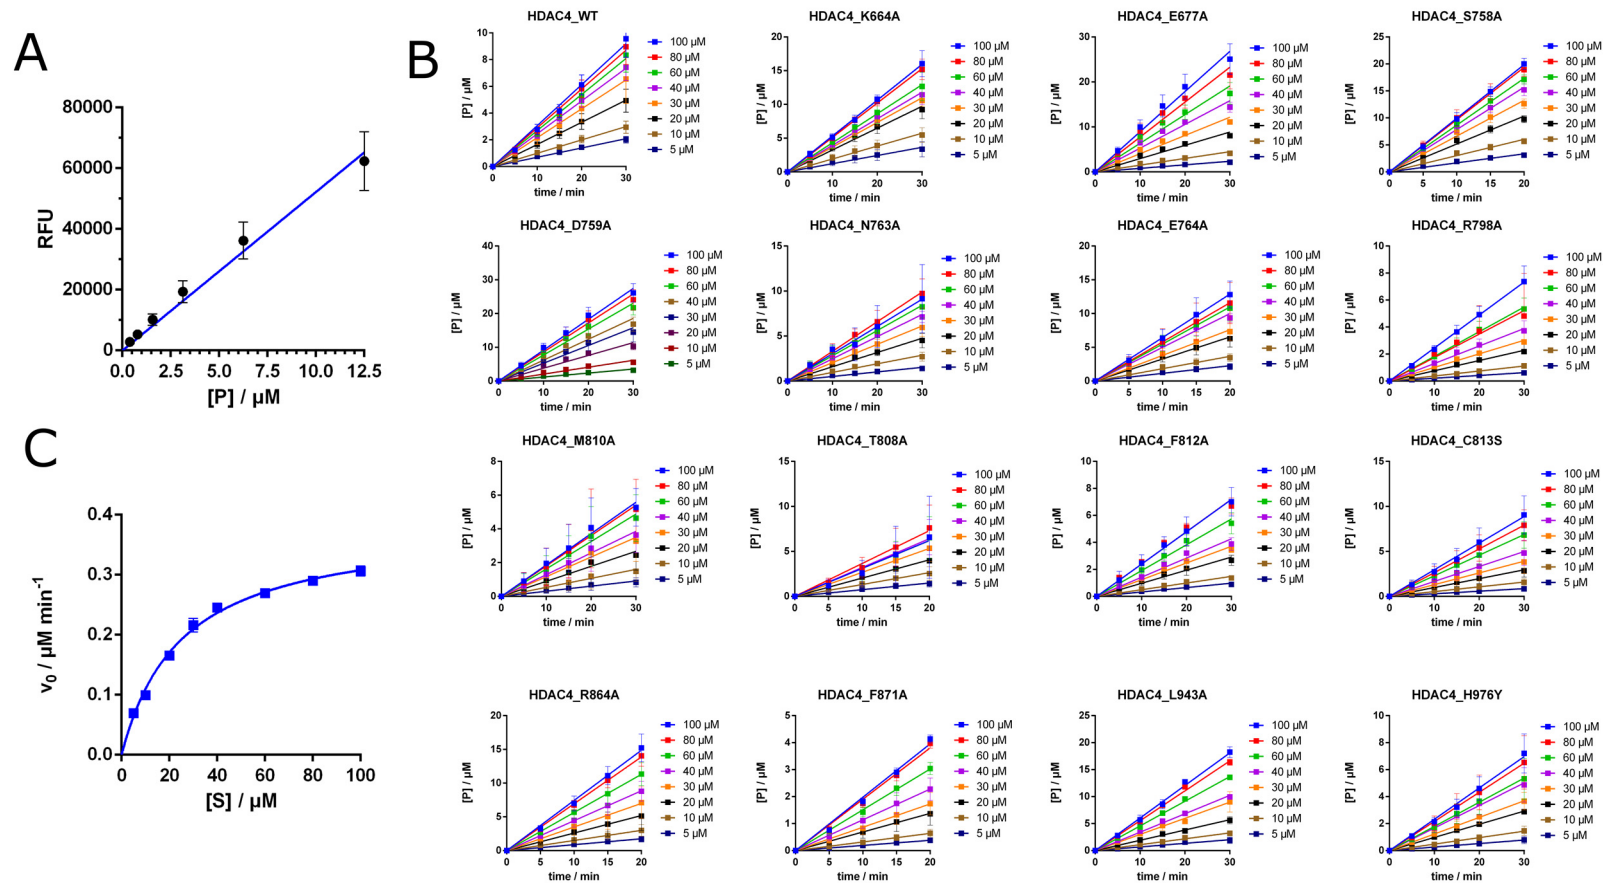

**Fig. S2: Determination of Michaelis-Menten Parameters.** (A) Calibration curve for the artificial substrate Boc-Lys{TFA}-AMC. A serial dilution of 7-Amino-4-methycoumarin was prepared and the slope of linear regression was calculated in RFU/ $\mu\text{M}$ . (B) Time progress curves for the HDAC4 wildtype and mutant variants with varying substrate concentrations. Y-axis was converted from RFU to product concentration using the slope of calibration from experiment A. Afterwards, the slope was calculated in  $\mu\text{M}/\text{min}$  which is the initial velocity of substrate conversion  $v_0$ . (C) Finally  $v_0$  was plotted against substrate concentration for each HDAC4 variant.  $K_m$  was calculated using a Michaelis-Menten fit in GraphPad Prism.

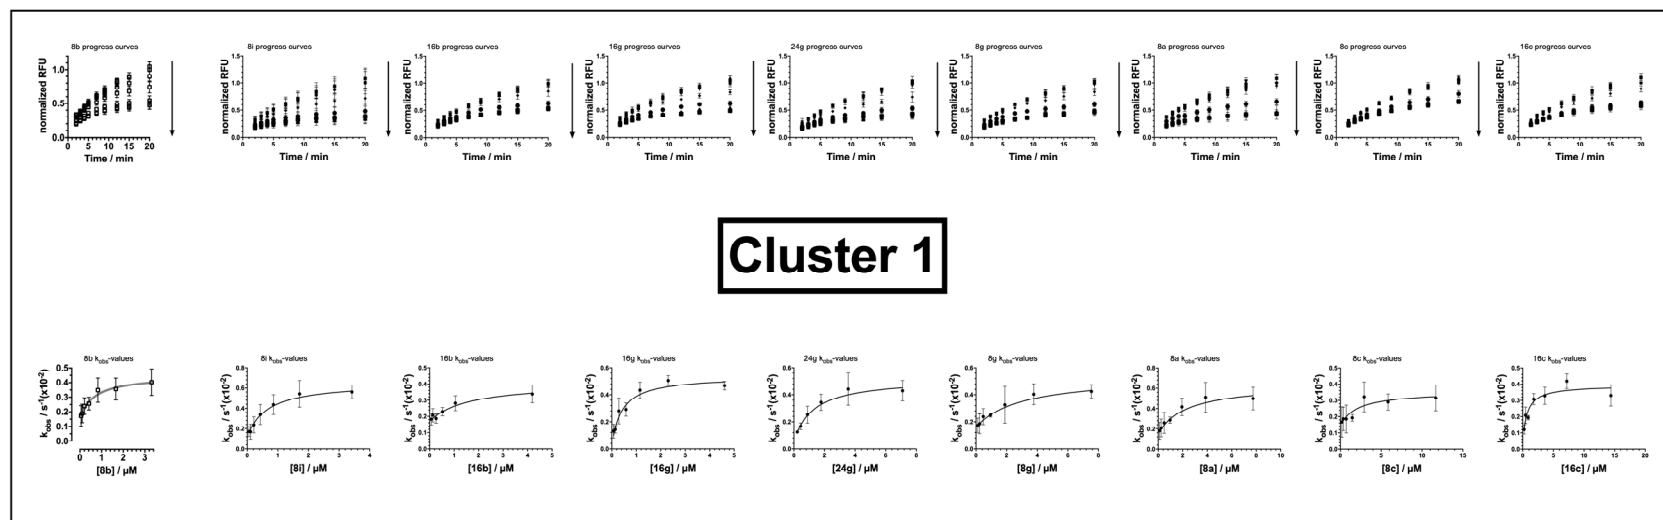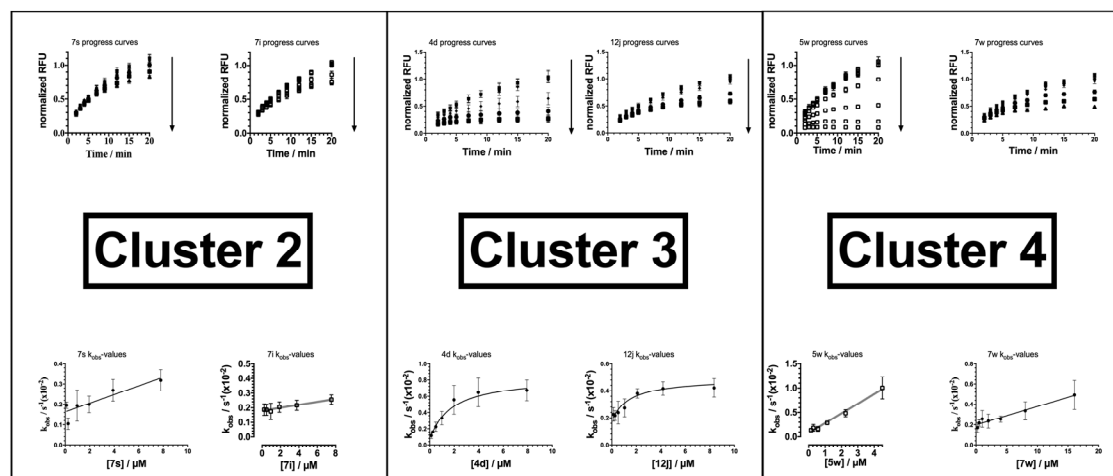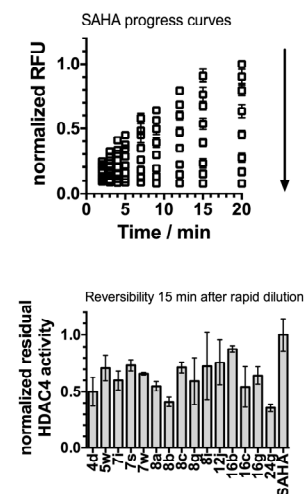

**Fig. S3: Kinetic data plots of TZD ligands.** Compound identifiers are displayed in the respective figures. Arrows indicate increasing TZD ligand concentration. Shown data represent means and standard deviations, N=3. Zoomable, high resolution picture (1200 dpi).

Tab. S4: IC<sub>50</sub>-values in  $\mu$ M for indicated TZD ligands towards cdHDAC4<sub>wt</sub> and corresponding mutants .

| TZD ligand | WT   | S758A | F871A | T808A | R864A | D759A | M810A | F812A | C813S | L943A | H976Y | K664A | E764A | N763A | R798A | E677A |
|------------|------|-------|-------|-------|-------|-------|-------|-------|-------|-------|-------|-------|-------|-------|-------|-------|
| <b>12d</b> | 1,25 | 8,63  | 5,86  | 6,66  | 17,84 | 2,40  | 5,07  | 31,22 | 3,23  | >50   | 1,64  | 3,30  | >50   | 0,91  | 7,40  | 1,05  |
| <b>12e</b> | 1,13 | 35,01 | 38,64 | 29,43 | 12,38 | 5,81  | 6,28  | >50   | 3,97  | >50   | 4,79  | 12,41 | >50   | 1,26  | 8,10  | 1,35  |
| <b>12j</b> | 1,42 | 28,85 | 14,61 | 16,76 | 8,01  | 4,84  | 15,99 | 28,85 | 8,83  | 44,92 | 6,21  | 2,91  | >50   | 4,83  | 4,04  | 4,19  |
| <b>14d</b> | 1,66 | 20,54 | 26,93 | 34,53 | 11,16 | 10,17 | 7,58  | 49,09 | 3,69  | >50   | 9,44  | 5,96  | >50   | 1,87  | 1,95  | 0,85  |
| <b>16a</b> | 1,06 | 32,44 | 9,98  | 10,63 | 10,33 | 2,33  | 8,67  | >50   | 25,31 | >50   | 15,35 | 17,31 | >50   | 2,84  | 14,31 | 2,01  |
| <b>16b</b> | 0,47 | 14,50 | 5,48  | 5,31  | 21,63 | 1,24  | 28,24 | >50   | 4,01  | 28,74 | 29,17 | 2,39  | >50   | 5,65  | 5,33  | 0,84  |
| <b>16c</b> | 1,66 | 26,25 | 7,61  | 10,42 | 11,61 | 3,14  | 7,78  | >50   | 3,95  | >50   | 26,42 | 6,53  | >50   | 1,70  | 2,47  | 0,88  |
| <b>16e</b> | 0,78 | 16,16 | 6,19  | 7,59  | 29,73 | 4,27  | 20,11 | >50   | 25,43 | >50   | 7,46  | 27,85 | >50   | 20,02 | 29,69 | >50   |
| <b>16g</b> | 2,04 | 11,91 | 6,34  | 7,70  | 11,09 | 2,09  | 9,29  | >50   | 4,61  | >50   | 15,10 | 2,96  | >50   | 1,41  | 2,91  | 2,24  |
| <b>20e</b> | 1,23 | 43,60 | 11,10 | 10,97 | 32,78 | 3,33  | 5,95  | 46,73 | 3,94  | >50   | 3,47  | 4,19  | >50   | 0,77  | 1,73  | 2,42  |
| <b>24e</b> | 0,69 | 41,36 | 3,85  | 13,85 | 20,07 | 2,38  | 7,45  | >50   | 4,11  | >50   | 28,45 | 7,15  | >50   | 2,12  | 5,85  | 0,58  |
| <b>24g</b> | 1,18 | 6,19  | 4,04  | 4,30  | 9,82  | 1,61  | 8,47  | >50   | 3,87  | >50   | 6,49  | 3,27  | >50   | 2,62  | 3,84  | 1,43  |
| <b>4d</b>  | 0,49 | 5,02  | 2,43  | 4,44  | 8,61  | 1,75  | 4,23  | 43,61 | 6,95  | >50   | 4,03  | 3,99  | >50   | 0,68  | 2,26  | 0,76  |
| <b>4j</b>  | 0,41 | 10,48 | 9,12  | 14,32 | 6,12  | 2,08  | 13,27 | 28,15 | 14,11 | >50   | 2,79  | 5,50  | >50   | 4,39  | 4,15  | 4,27  |
| <b>4k</b>  | 1,17 | 23,60 | 9,29  | 4,20  | 4,15  | 2,26  | 8,81  | 48,59 | 3,97  | >50   | 4,12  | 3,67  | >50   | 0,72  | 4,14  | 0,41  |
| <b>5w</b>  | 0,78 | 3,04  | 8,66  | 2,02  | 7,36  | 1,93  | 4,43  | 25,47 | 4,04  | >50   | 3,60  | 4,92  | 33,24 | 1,81  | 7,20  | 11,00 |
| <b>7b</b>  | 0,73 | 21,37 | >50   | 28,98 | 29,25 | 6,73  | 13,77 | 34,75 | 26,32 | >50   | 8,53  | 8,56  | >50   | 5,31  | 7,38  | >50   |
| <b>7i</b>  | 1,04 | 31,05 | 4,90  | 38,94 | 28,93 | 1,99  | 19,85 | >50   | 23,95 | >50   | 26,72 | 37,15 | >50   | 6,10  | 2,77  | 4,55  |
| <b>7l</b>  | 0,47 | 16,16 | 2,55  | 11,70 | 28,93 | 2,17  | 20,07 | >50   | 23,07 | >50   | 26,72 | 6,89  | >50   | 3,54  | 2,77  | 3,26  |
| <b>7n</b>  | 0,45 | 26,53 | 10,53 | 29,76 | 29,31 | 1,61  | 4,95  | >50   | 9,24  | >50   | 25,27 | 7,42  | >50   | 4,67  | 2,40  | 4,29  |
| <b>7s</b>  | 1,41 | 20,26 | 34,79 | 18,55 | 16,47 | 6,42  | 9,25  | >50   | 26,44 | >50   | 27,38 | 8,49  | 49,16 | 12,83 | 6,29  | >50   |
| <b>7w</b>  | 0,47 | 22,36 | 13,69 | 34,02 | 6,41  | 0,63  | 21,39 | >50   | >50   | >50   | 0,44  | 4,68  | >50   | 2,99  | 3,58  | 8,00  |
| <b>8a</b>  | 0,90 | >50   | 32,23 | 30,02 | 39,30 | 6,00  | 26,58 | >50   | 25,33 | >50   | 15,61 | 32,61 | >50   | 9,80  | 21,24 | >50   |
| <b>8b</b>  | 0,44 | 3,21  | 3,55  | 1,93  | 5,16  | 1,09  | 4,27  | 25,85 | 2,50  | >50   | 9,00  | 2,51  | 33,51 | 1,74  | 3,91  | 2,96  |
| <b>8c</b>  | 0,51 | >50   | 5,40  | 33,57 | 11,29 | 4,22  | 9,22  | >50   | 4,03  | 37,56 | 26,77 | 6,36  | >50   | 1,41  | 1,46  | 2,89  |
| <b>8e</b>  | 0,54 | 11,03 | 1,99  | 4,21  | 29,49 | 1,50  | 7,39  | >50   | 6,55  | >50   | 11,52 | 5,72  | >50   | 1,26  | 7,55  | 1,17  |
| <b>8g</b>  | 0,22 | 13,07 | 4,99  | 11,89 | 11,60 | 1,97  | 6,37  | >50   | 4,69  | >50   | 2,84  | 5,03  | >50   | 1,18  | 5,23  | 2,11  |
| <b>8i</b>  | 0,17 | 3,15  | 3,50  | 2,90  | 6,93  | 0,91  | 2,88  | 40,56 | 25,73 | >50   | 1,93  | 2,34  | >50   | 1,03  | 1,04  | 11,81 |



## DOCKING

A)

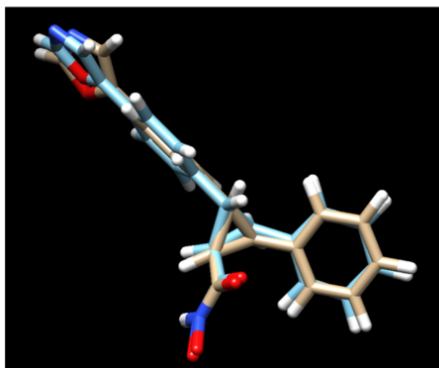

B)

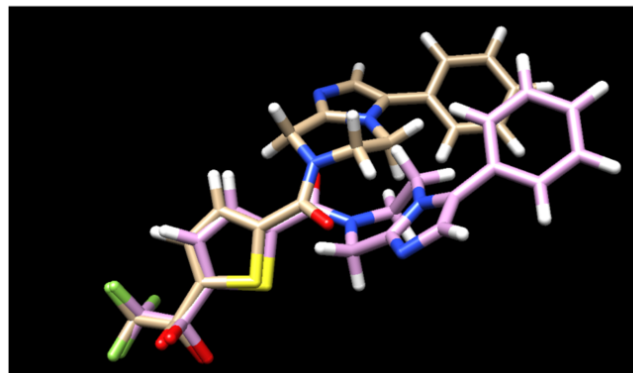

Fig. S5: Overlay of crystallized and redocked ligands in complex with A) HDAC4<sub>c</sub> (PDB-ID: 4CBY) and B) HDAC4<sub>o</sub> (PDB-ID: 2VQJ).

# Overlay: closed (4CBY) and open (2VQJ) HDAC4 - intact structures:

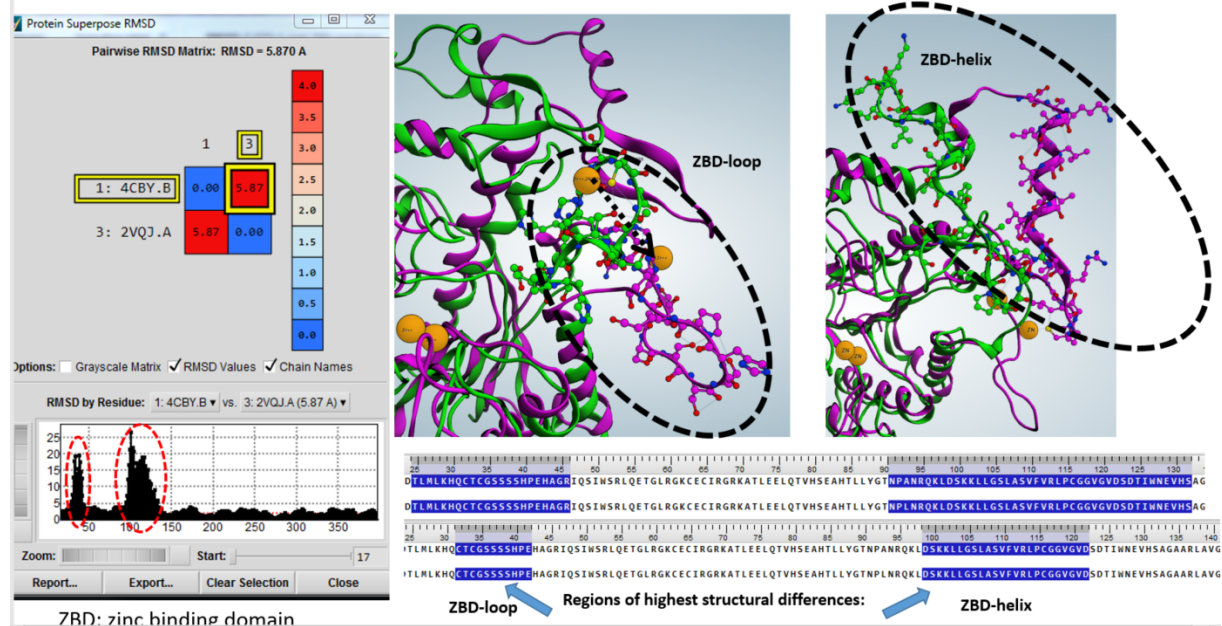

Fig. S6: Regions of largest structural shifts for the transition from *closed* to *open* conformation of HDAC4.

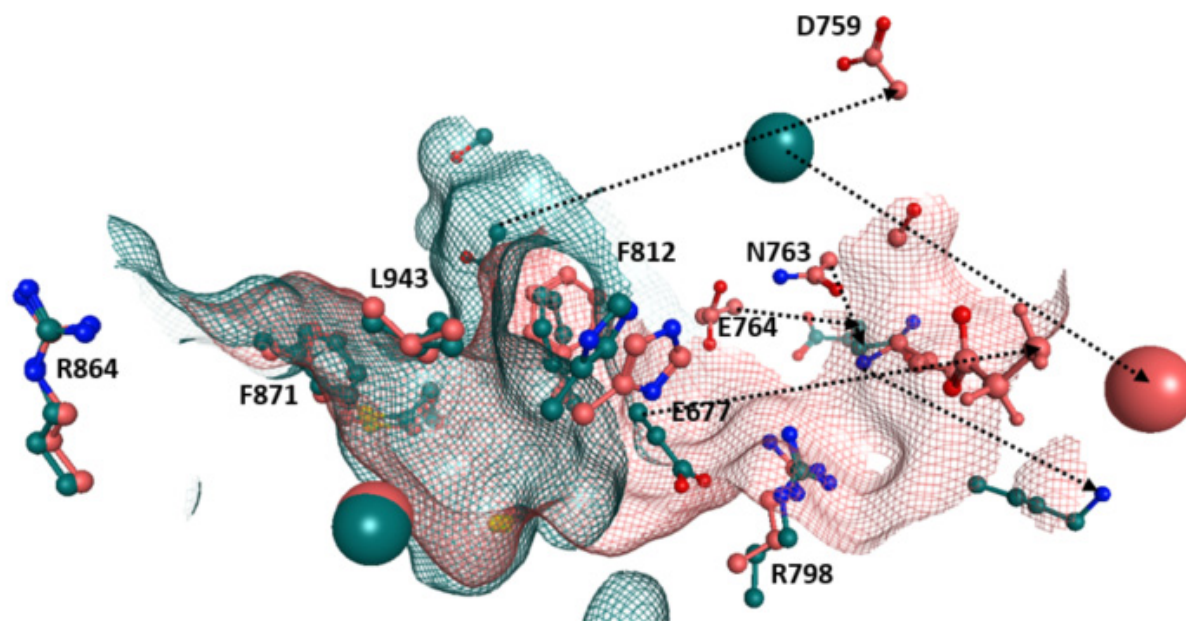

**Fig. S7:** Overlay of HDAC4c (4CBY, dark cyan) and HDAC4o (2VQJ, dark pink) showing the amino acids that are mutated in this study. Larger shifts upon the transition from open to closed conformation are indicated by dotted black arrows. The bigger beads represent the catalytic and structural zinc ions.

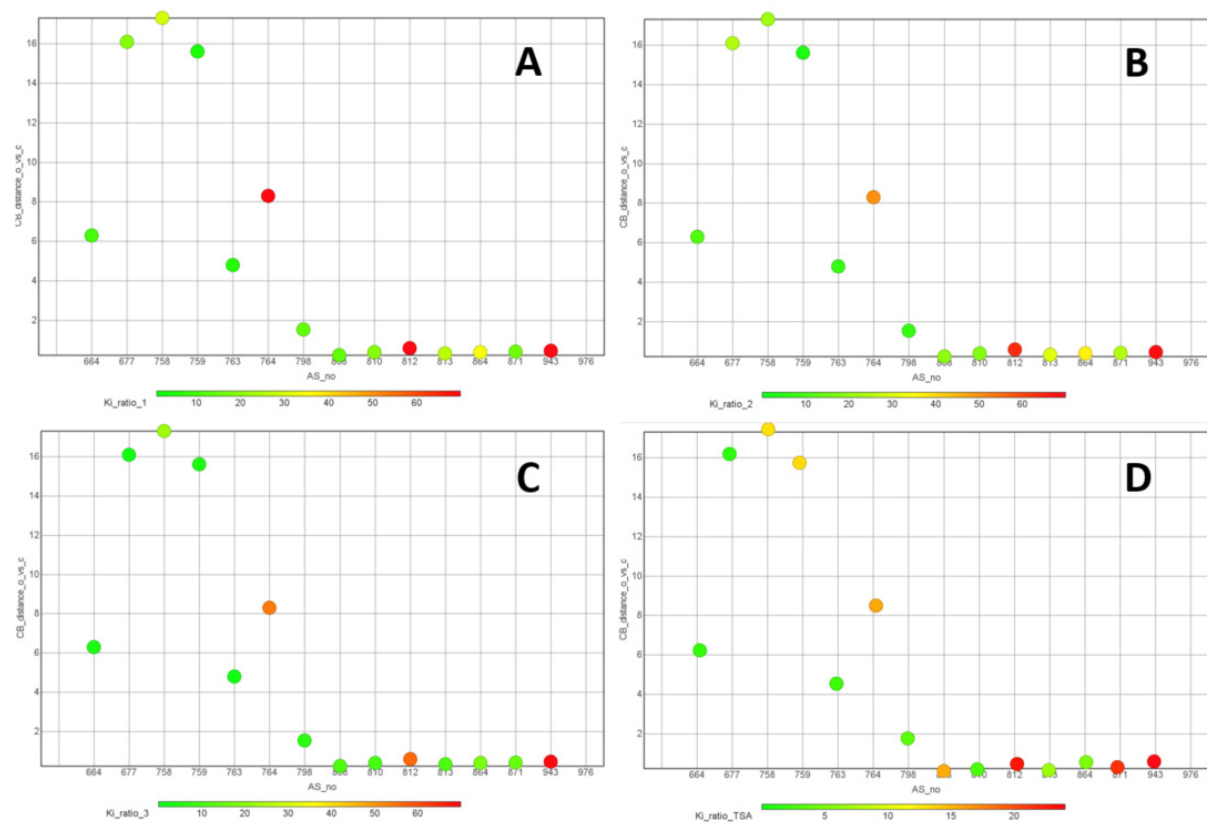

**Fig. S8:** The distance between C $\beta$ -atoms is plotted versus the number of the mutated amino acids. Coloring is according to the Ki-ratio for docking poses in A) cluster 1, B) cluster 2, C) cluster 3 and D) TSA.

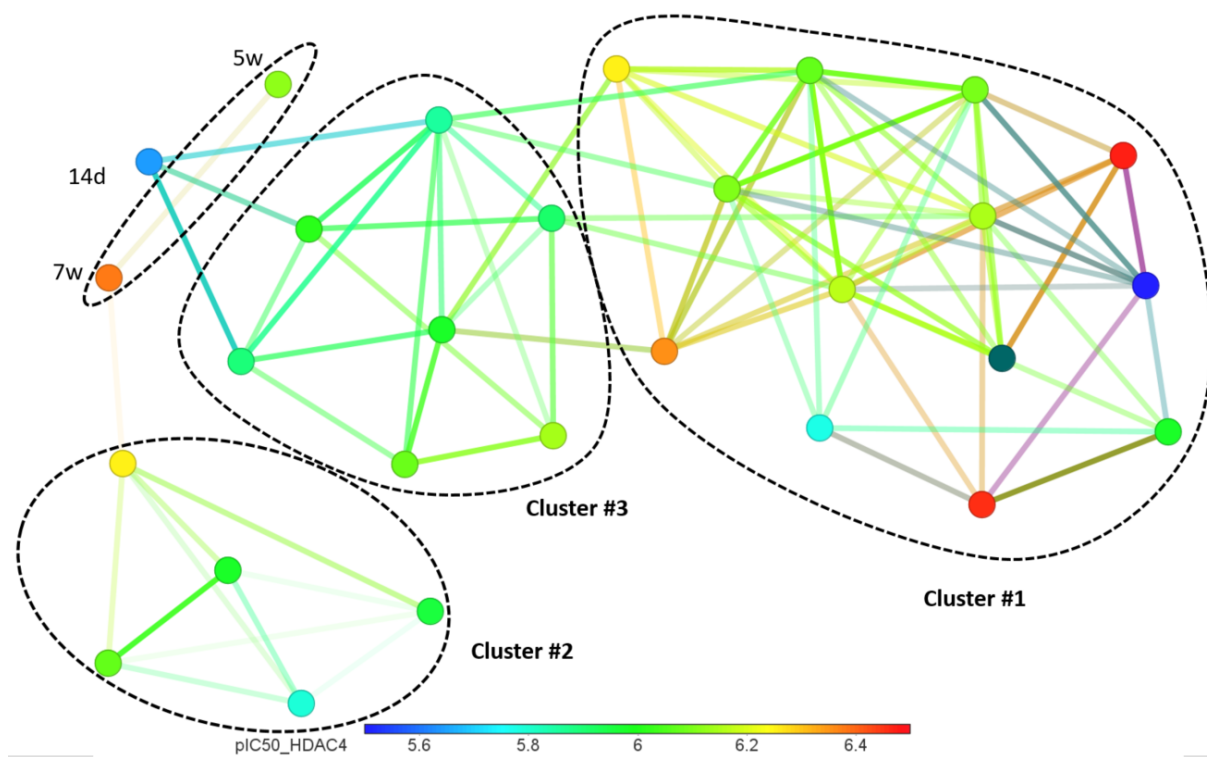

**Fig. S9: Cluster analysis of most active TZA analogs.** Each dot represents one compound. The dots are colored according to experimental  $pIC_{50}$  against  $cdHDAC4_{wt}$ . Structurally nearest neighbours are connected by lines.

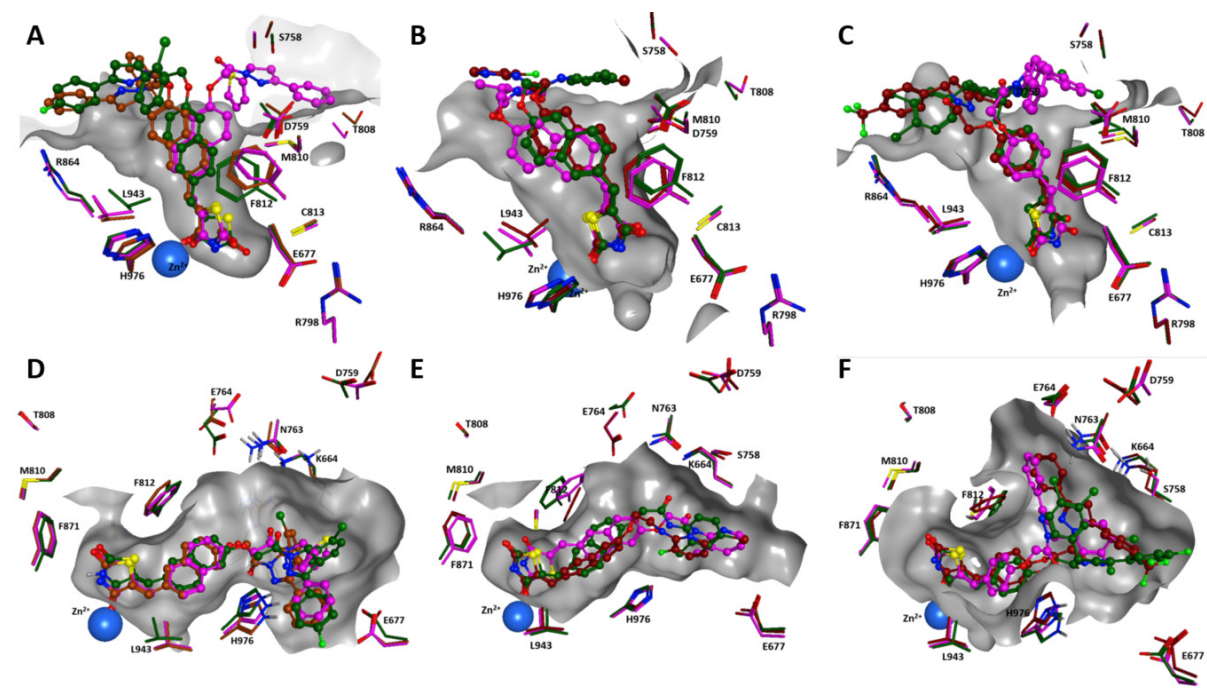

**Fig. S10: Overlap of docking poses of TZD analogs to A)-C) HDAC4<sub>c</sub> (PDB-ID: 4CBY) and D)-F) HDAC4<sub>o</sub> (PDB-ID: 2VQJ).** Docking poses of cluster 1 containing (S)-16b [green], (S)-8i [magenta] and (S)-8b [brown] are shown in A and D, cluster 2 containing 7l [green], 7n [magenta] and 7s [brown] in B and E, and cluster 3 containing (R)-12j [green], (R)-4d [brown] and (R)-4j [magenta] are shown in C and F. The catalytic zinc ion at the bottom of the binding pocket is colored blue and the surface of the pocket light gray.

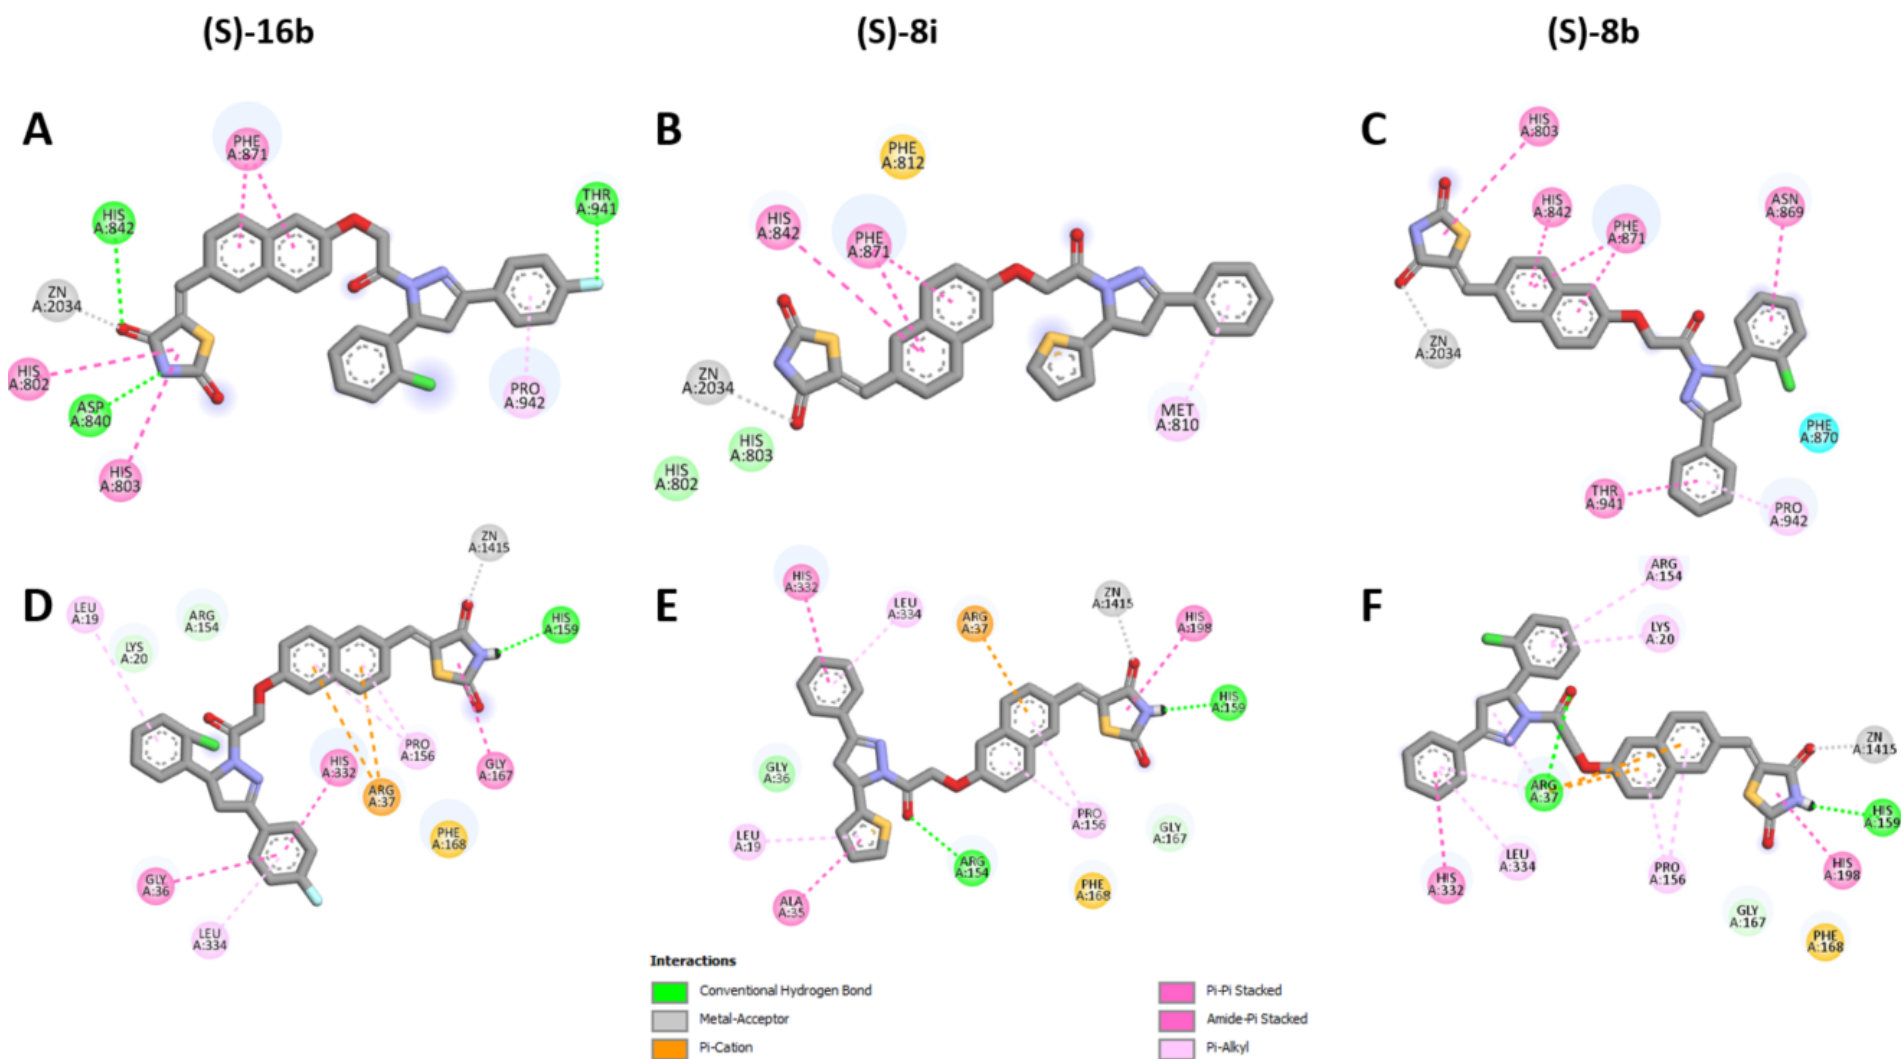

Fig. S11: 2D ligand interactions of (S)-16b, (S)-8i and (S)-8b in the binding pocket of A)-C) HDAC4<sub>c</sub> (PDB-ID: 4CBY) and D)-F) HDAC4<sub>o</sub> (PDB-ID: 2VQJ).

Tab. S11: Open reading frame of cdHDAC4<sub>wt</sub> in pET14b for recombinant protein expression.

ATGGGCAGCAGCCATCATCATCATCACGGTACCATGTCGGACTCAGAAGTCAATCAAGAAGCTAAGCCAGAGGTCAAGCCAGAAGTCAAGCCTGAGACTCACATCAATTTAA  
AGGTGTCCGATGGATCTTCAGAGATCTTCTTCAAGATCAAAAAGACCACTCCTTTAAGAAGGCTGATGGAAGCGTTCGCTAAAAGACAGGGTAAGGAAATGGACTCCTTAAGATT  
CTTGACGACGGTATTAGAATTCAAGCTGATCAGACCCCTGAAGATTTGGACATGGAGGATAACGATATTATTGAGGCTCACAGAGAACAGATTGGTGGT CATATGACCAAACCG  
CGCTTTACGACGGGTCTGGTCTACGACACGCTGATGCTGAAACACCAATGCACCTGTGGCTCAAGCTCCTCACATCCGGAACATGCAGGCCGCATTAGTCGATCTGGAGCCGTCT  
GCAAGAAACCGGCCTGCGCGGTAAATGCGAATGTATTCGTGGCCGCAAAGCCACCCTGGAAGAACTGCAGACGGTGCATTCCGAAGCACACACCCTGCTGTATGGTACGAACCC  
GCTGAATCGTCAAAAACCTGGATAGTAAAAAAGCTGCTGGGCTCTCTGGCGAGTGTCTTTGTGCGTCTGCCGTGCGGTGGTGTGGTGTGCGATTCTGACACCATCTGGAACGAAGTG  
CACAGTGCAGGTGCAGCACGTCTGGCAGTTGGTTGTGTGGTTGAACTGGTCTTTAAAGTGGCGACCGGCGAACTGAAAAACGGTTTCGCAGTCGTGCGTCCGCCGGGTGCATCAG  
CAGAAGAATCGACGCCGATGGGTTTTTGTCTATTCAATAGCGTGGCCGTTGCAGCTAACTGCTGCAGCAACGTCTGAGTGTTTCCAAAATTCTGATCGTTGATTGGGACGTCCAT  
CACGGCAACGGTACCCAGCAAGCGTTCTACTCCGATCCGTGAGTGTATATGTCTCTGCATCGCTACGATGACGGCAACTTTTTCCCGGGCAGTGGTGCACCGGATGAAGTTGG  
TACCGGTCCGGGTGTGGGTTTTAACGTTAATATGGCTTTCACGGGCGGTCTGGACCCGCCGATGGGTGACGCGGAATATCTGGCGGCCTTTCGTACCGTTGTCATGCCGATTGCAA  
GCGAATTTGCTCCGGATGTGGTTCTGGTTAGCTCTGGCTTTGACGCAGTCGAAGGTCATCCGACCCCGCTGGGCGGTTATAACCTGAGCGCACGTTGCTTTGGCTACCTGACGAAA  
CAGCTGATGGGTCTGGCAGGCGGTGCGATTGTGCTGGCTCTGGAAGGCGGTACGATCTGACCGCTATCTGCGACGCATCGGAAGCATGTGTCAGCGCACTGCTGGGTAATGAA  
CTGGACCCGCTGCCGAAAAAGTTCTGCAGCAACGTCCGAACGCAAATGCTGTCCGCTCCATGGAAAAAGTGATGGAAATCCACTCAAAATACTGGCGTTGTCTGCAGCGCACCA  
CGTCTACGGCAGGTGCGAGTCTGATTGAAGCGCAAACGTGTGAAAACGAAGAAGCCGAAACCGTGACGGAGCTCAGCGCATGGAGCCATCCGCAGTTTGAAAAATGA

START

His<sub>6</sub>-SUMO

cHDAC4<sub>wt</sub>

Strep(II)-tag

STOP



**Tab. S12: Mutant to cdHDAC4<sub>wt</sub> (WT) IC50 ratios.** Mutant HDAC4 variants were generated using splicing by overlap extension PCR (SOE-PCR) with the following primers and cloned into a pET14b vector (Novagen, EMD Millipore) consists of a n-terminal His6-SUMO-tag and c-terminal Strep(II)-tag with NdeI and BamHI restriction enzymes.

| <b>Primer</b> | <b>5'-sequence-3'</b>             |
|---------------|-----------------------------------|
| K664A_for     | ACGCTGATGCTGGCTCACCAATGCACC       |
| K664A_rev     | GGTGCATTGGTGAGCCAGCATCAGCGT       |
| E677A_for     | TCCTCACATCCGGCTCATGCAGGCCGC       |
| E677A_rev     | GCGGCCTGCATGAGCCGGATGTGAGGA       |
| S758A_for     | GTTGGTGTCTGATGCTGACACCATCTGG      |
| S758A_rev     | CCAGATGGTGTCTCAGCATCGACACCAAC     |
| D759A_for     | GGTGTCTGATTCTGCTACCATCTGGAAC      |
| D759A_rev     | GTTCCAGATGGTAGCAGAATCGACACC       |
| N763A_for     | GACACCATCTGGGCTGAAGTGCACAGT       |
| N763A_rev     | ACTGTGCACTTCAGCCCAGATGGTGTC       |
| E764A_for     | ACCATCTGGAACGCTGTGCACAGTGCA       |
| E764A_rev     | TGCACTGTGCACAGCGTTCCAGATGGT       |
| R798A_for     | TTCGCAGTCGTGGCTCCGCCGGGTCAT       |
| R798A_rev     | ATGACCCGGCGGAGCCACGACTGCGAA       |
| T808A_for     | GCAGAAGAATCGGCTCCGATGGGTTTT       |
| T808A_rev     | AAAACCCATCGGAGCCGATTCTTCTGC       |
| M810A_for     | GAATCGACGCCGGCTGGTTTTTGCTAT       |
| M810A_rev     | ATAGCAAAAACCAGCCGGCGTCGATTC       |
| F812A_for     | ACGCCGATGGGTGCTTGCTATTTCAAT       |
| F812A_rev     | ATTGAAATAGCAAGCACCCATCGGCGT       |
| C813S_for     | ACGCCGATGGGTTTTTCTTATTTCAATAGCGTG |
| C813S_rev     | CACGCTATTGAAATAAGAAAAACCCATCGGCGT |
| R864A_for     | ATGTCTCTGCATGCTTACGATGACGGC       |
| R864A_rev     | GCCGTCATCGTAAGCATGCAGAGACAT       |
| F871A_for     | GACGGCAACTTTGCTCCGGGCAGTGGT       |

|           |                                   |
|-----------|-----------------------------------|
| F871A_rev | ACCACTGCCCCGGAGCAAAGTTGCCGTC      |
| L943A_for | CATCCGACCCCGGCTGGCGGTTATAAC       |
| L943A_rev | GTTATAACCGCCAGCCGGGGTCGGATG       |
| H976Y_for | GCTCTGGAAGGCGGTTATGATCTGACCGCTATC |
| H976Y_rev | GATAGCGGTCAGATCATAACCGCCTTCCAGAGC |

## Structural characterization

2-(2,4-dioxo-5-(pyridin-2-ylmethylene)thiazolidin-3-yl)-N-(6-nitrobenzo[d]thiazol-2-yl)acetamide (PB1)

### 1. FTIR

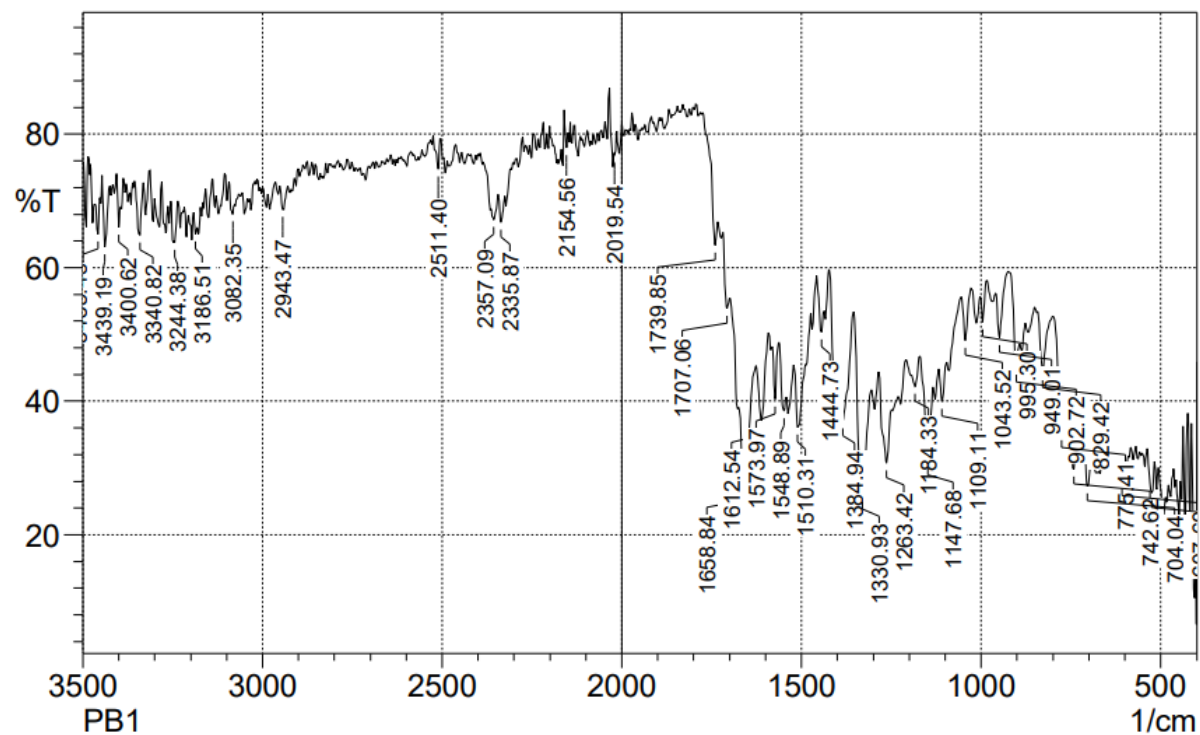

### 2. <sup>1</sup>H-NMR

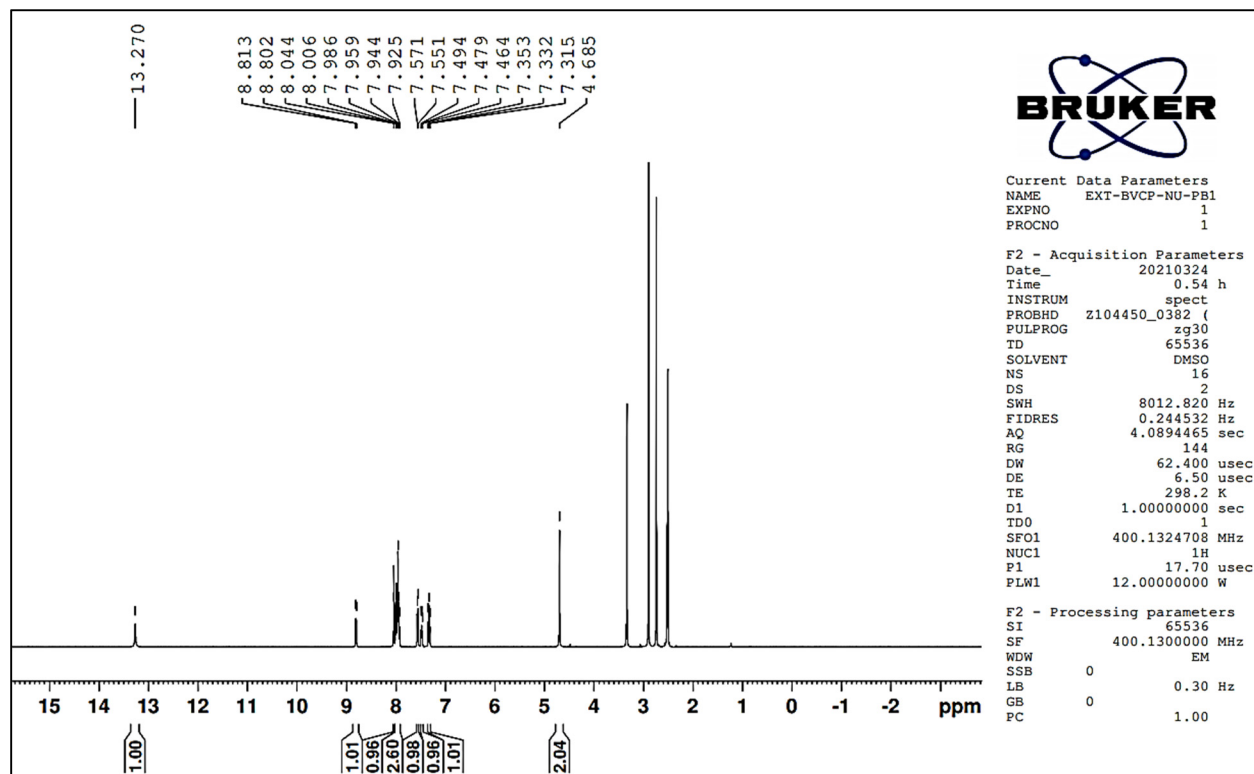

### 3. 13C-NMR



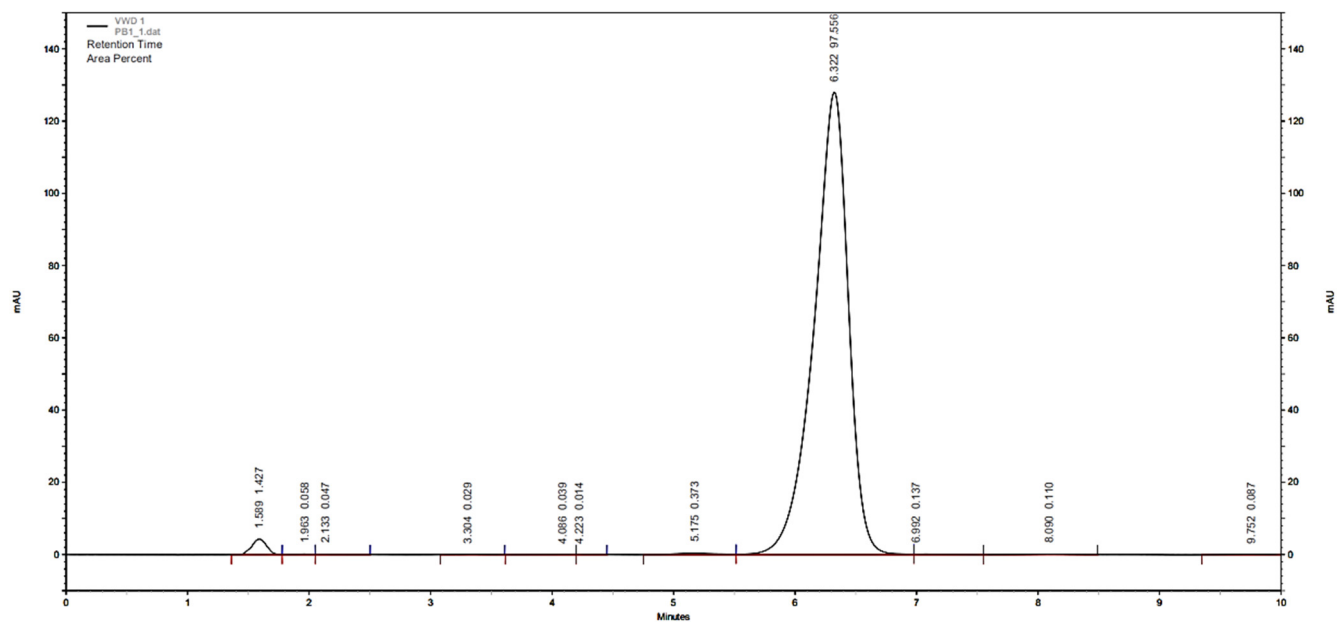

## 5. Mass

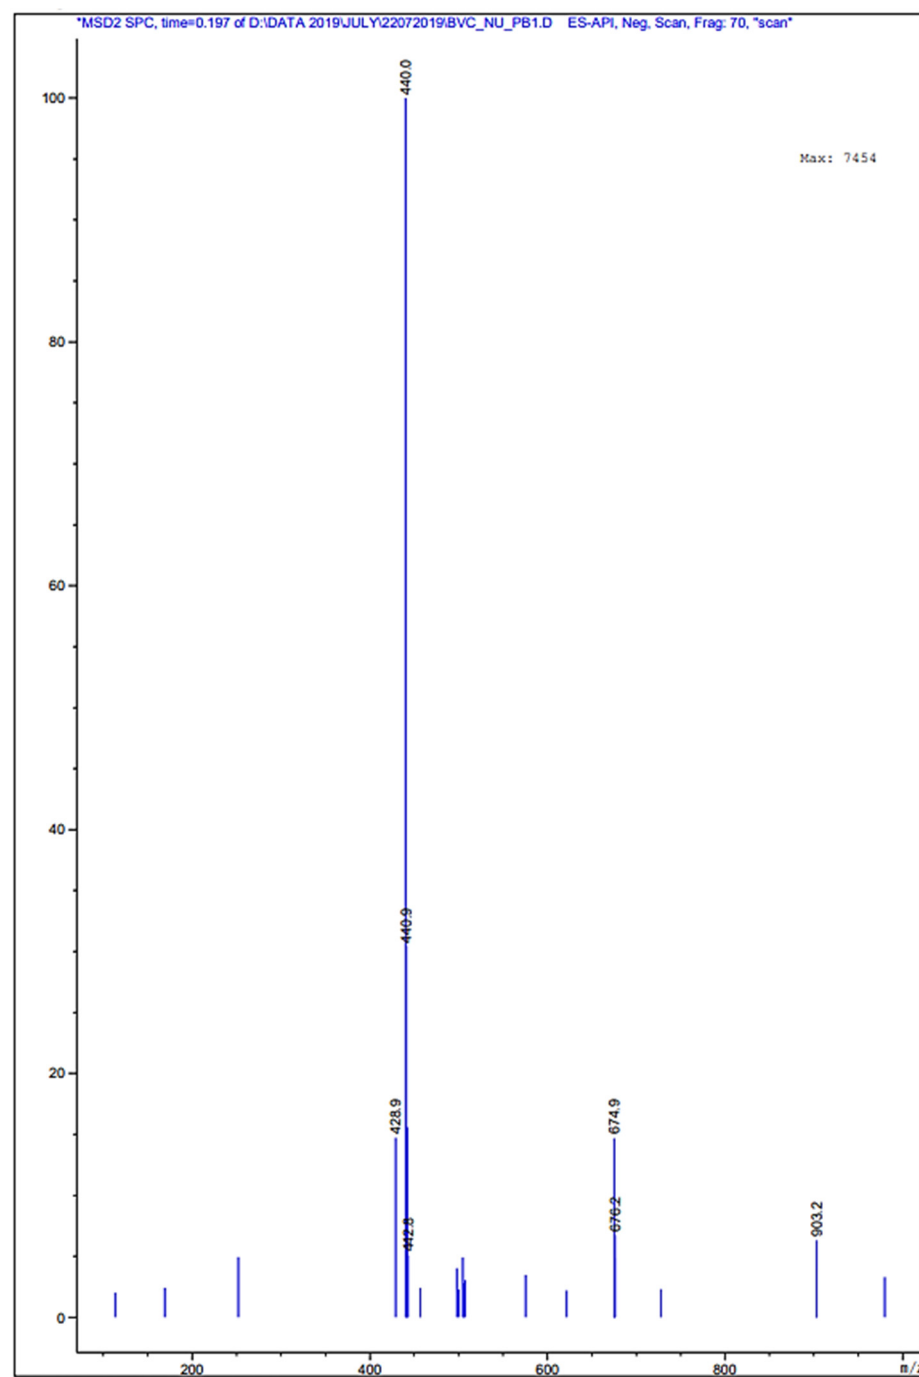

2-(2,4-dioxo-5-(pyridin-2-ylmethylene)thiazolidin-3-yl)-N-(4-methylbenzo[d]thiazol-2-yl)acetamide (PB2)

1. FTIR

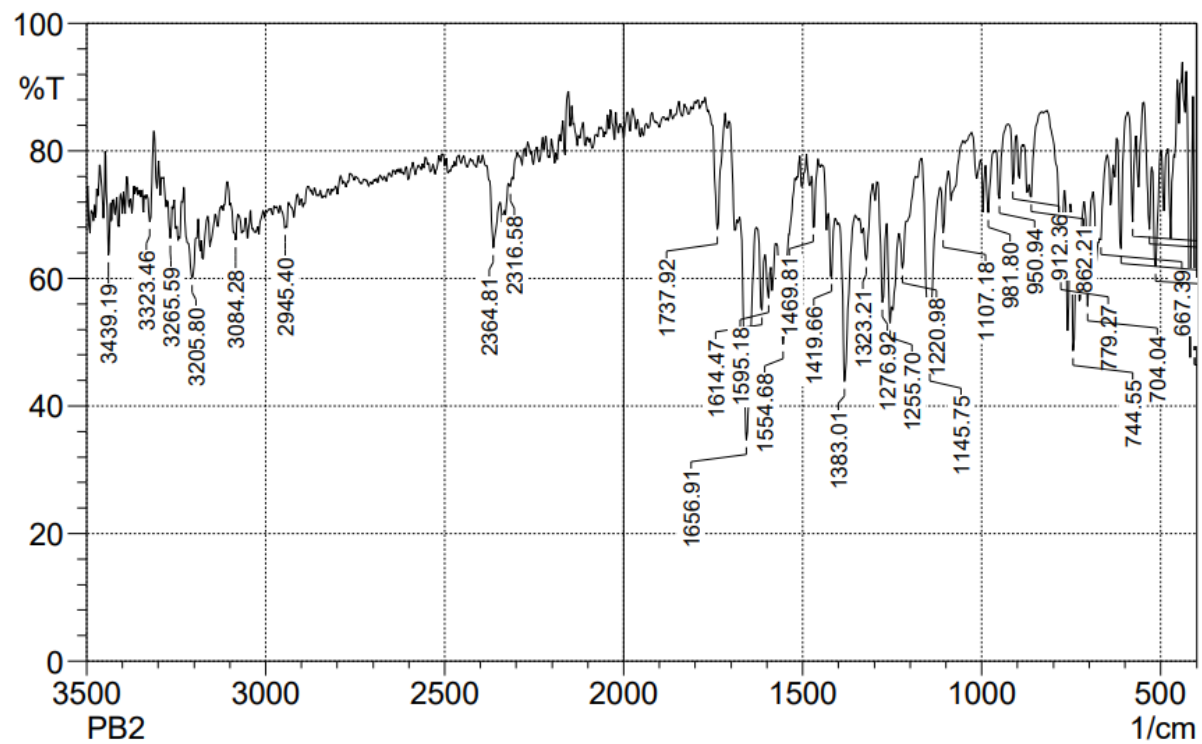

2.  $^1\text{H-NMR}$



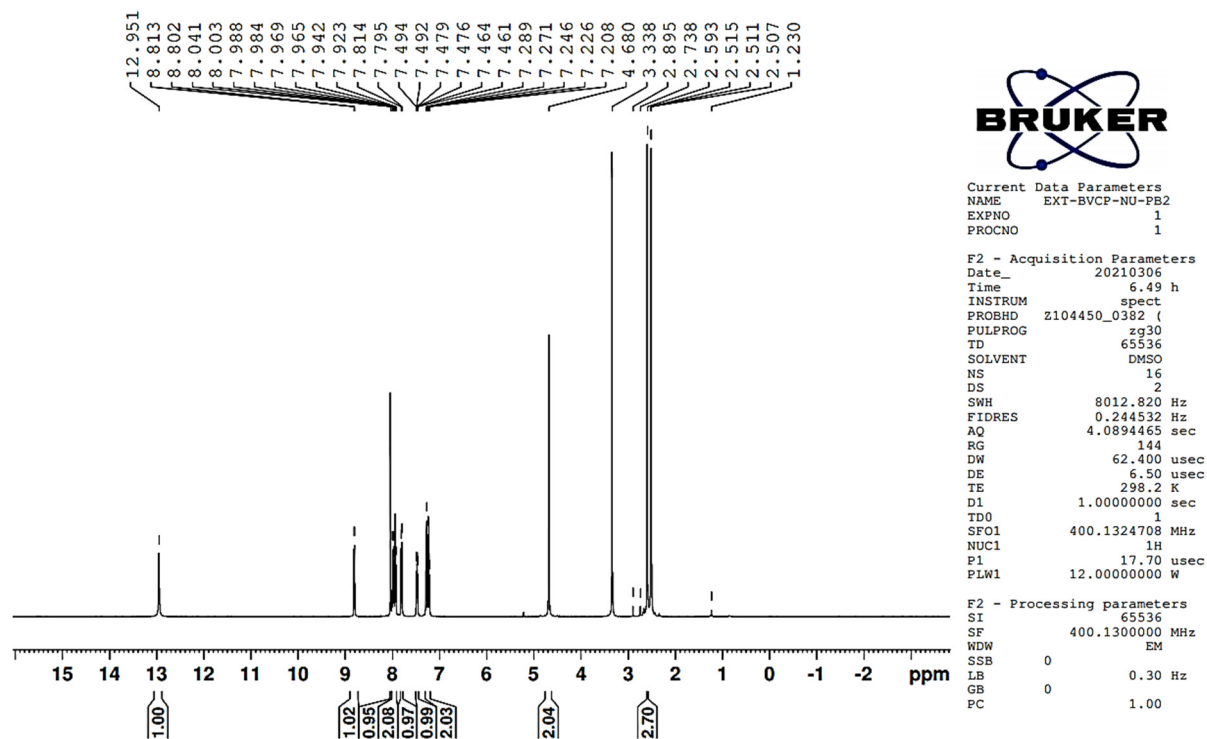

### 3. 13C-NMR

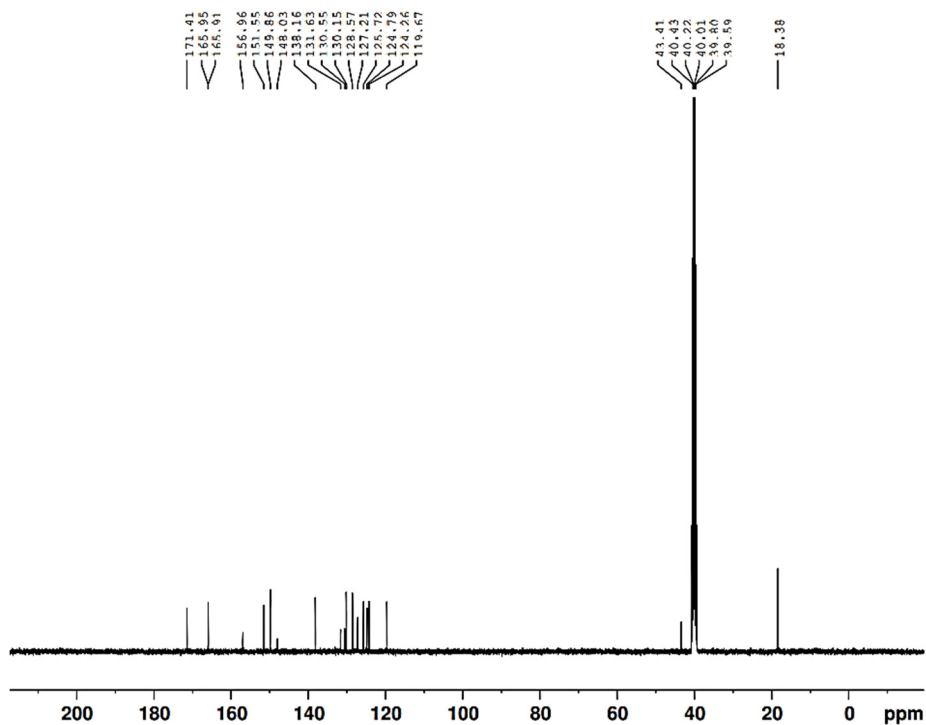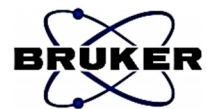

Current Data Parameters  
NAME EXT-BVCP-NU-PB2  
EXPNO 2  
PROCNO 1

F2 - Acquisition Parameters  
Date\_ 20210306  
Time 7.48 h  
INSTRUM spect  
PROBHD Z104450\_0382 (   
PULPROG zgpg30  
TD 65536  
SOLVENT DMSO  
NS 1024  
DS 4  
SWH 24038.461 Hz  
FIDRES 0.733596 Hz  
AQ 1.3631488 sec  
RG 203  
DW 20.800 usec  
DE 6.50 usec  
TE 298.2 K  
D1 2.00000000 sec  
D11 0.03000000 sec  
TD0 1  
SFO1 100.6228298 MHz  
NUC1 13C  
P1 11.00 usec  
PLW1 58.00000000 W  
SFO2 400.1316005 MHz  
NUC2 1H  
CPDPRG[2] waltz16  
PCPD2 90.00 usec  
PLW2 12.00000000 W  
PLW12 0.46413001 W  
PLW13 0.23345999 W

F2 - Processing parameters  
SI 32768  
SF 100.6127685 MHz  
WDW EM  
SSB 0  
LB 1.00 Hz  
GB 0  
PC 1.40

#### 4. HPLC

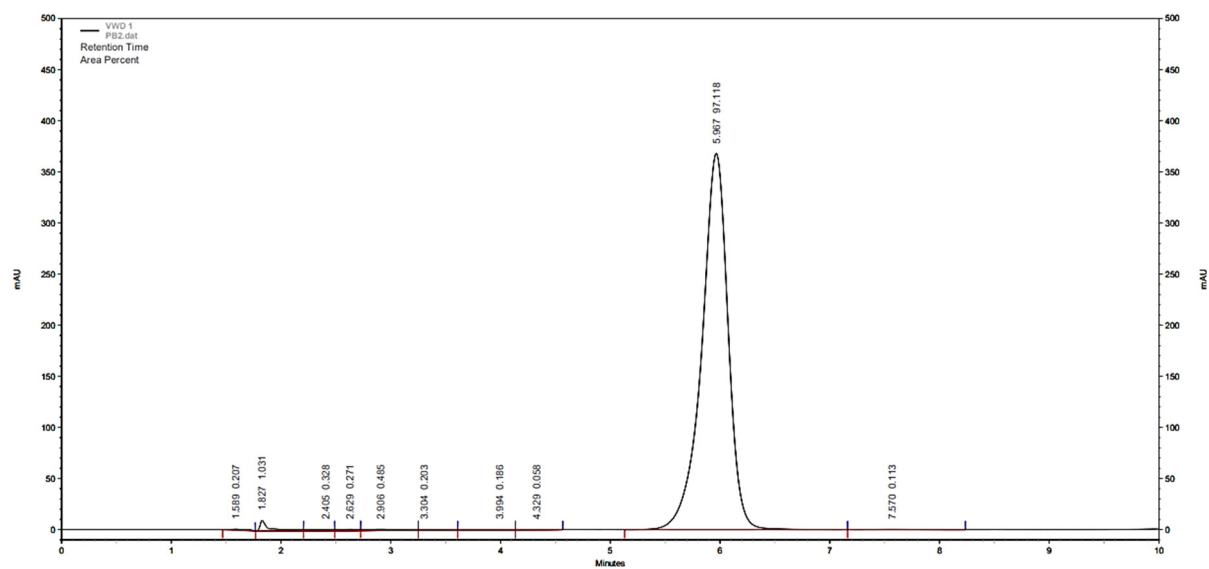

## 5. Mass

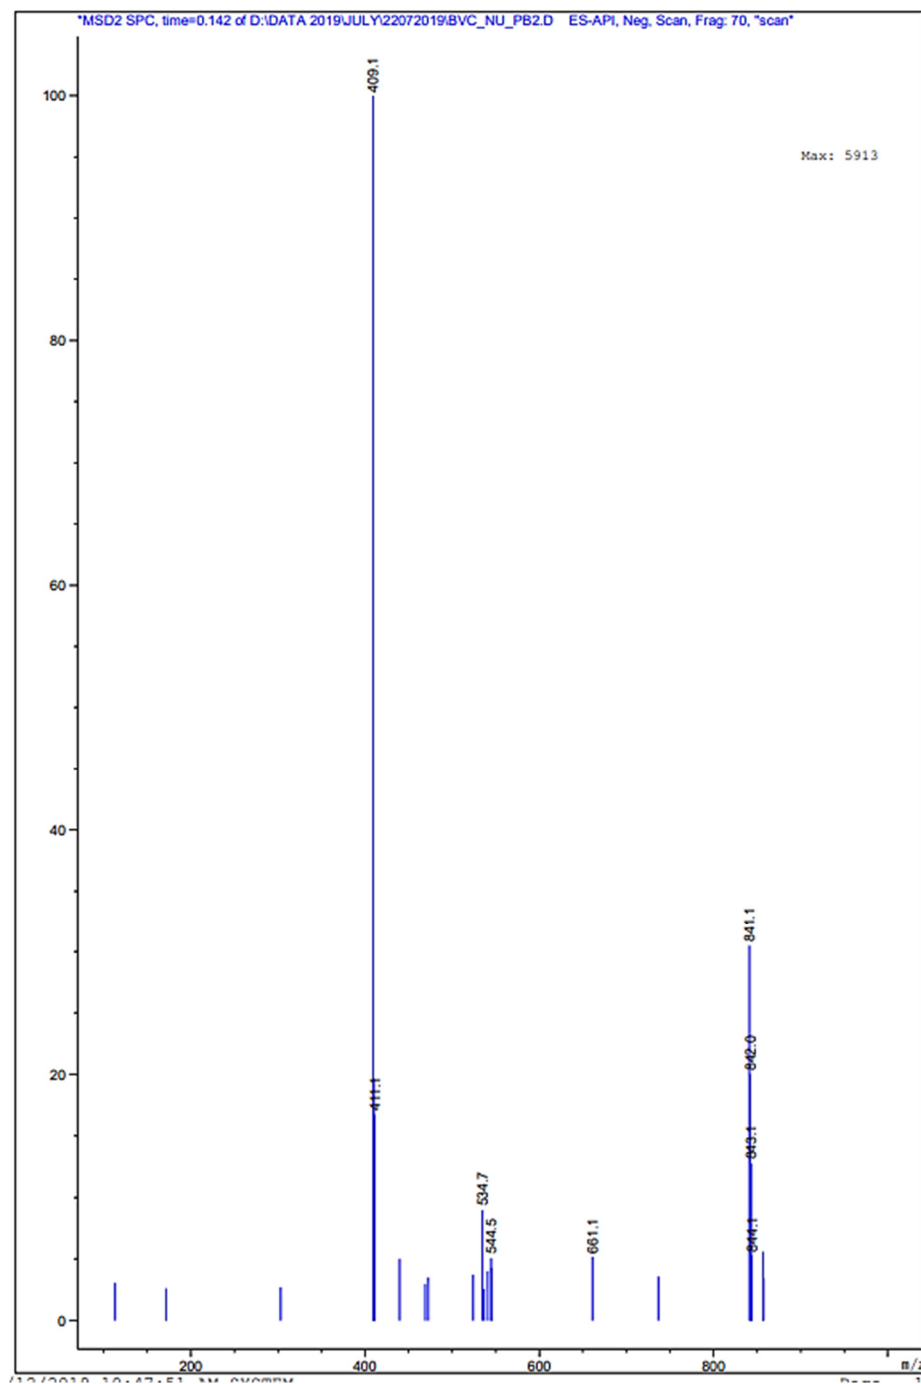

2-(2,4-dioxo-5-(pyridin-2-ylmethylene)thiazolidin-3-yl)-N-(6-methylbenzo[d]thiazol-2-yl)acetamide (PB3)

1. FTIR

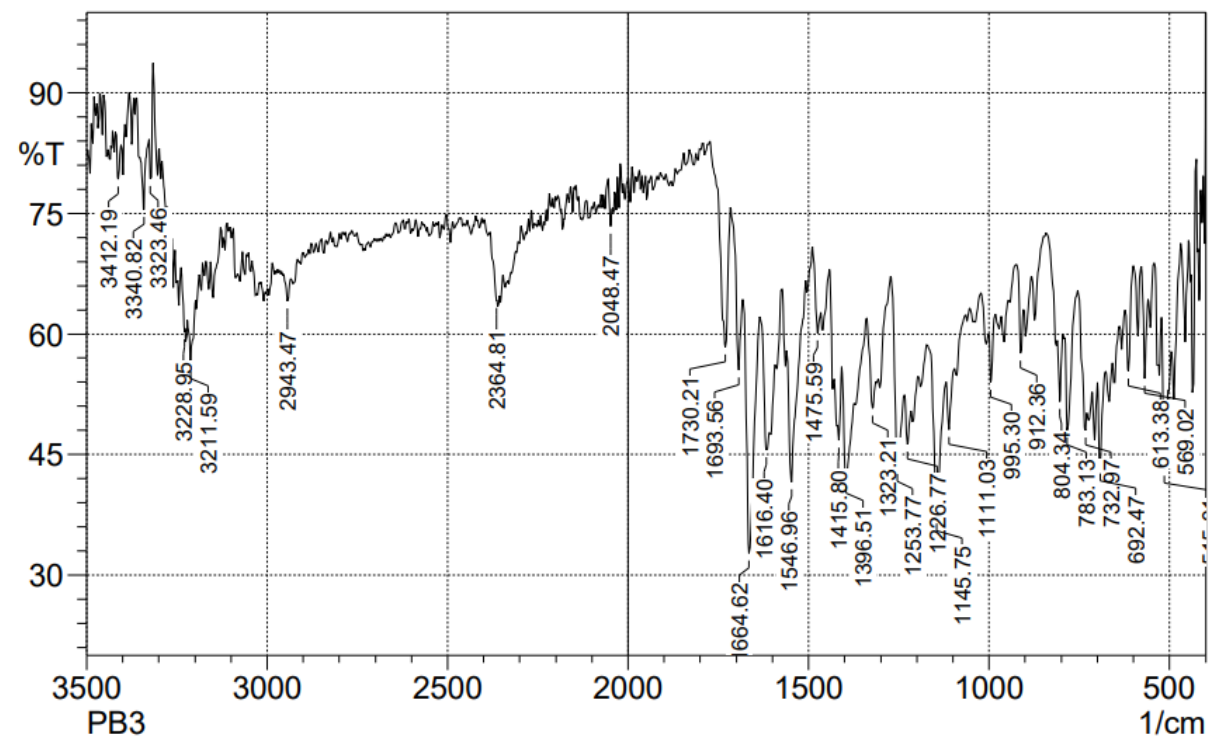

2. <sup>1</sup>H-NMR

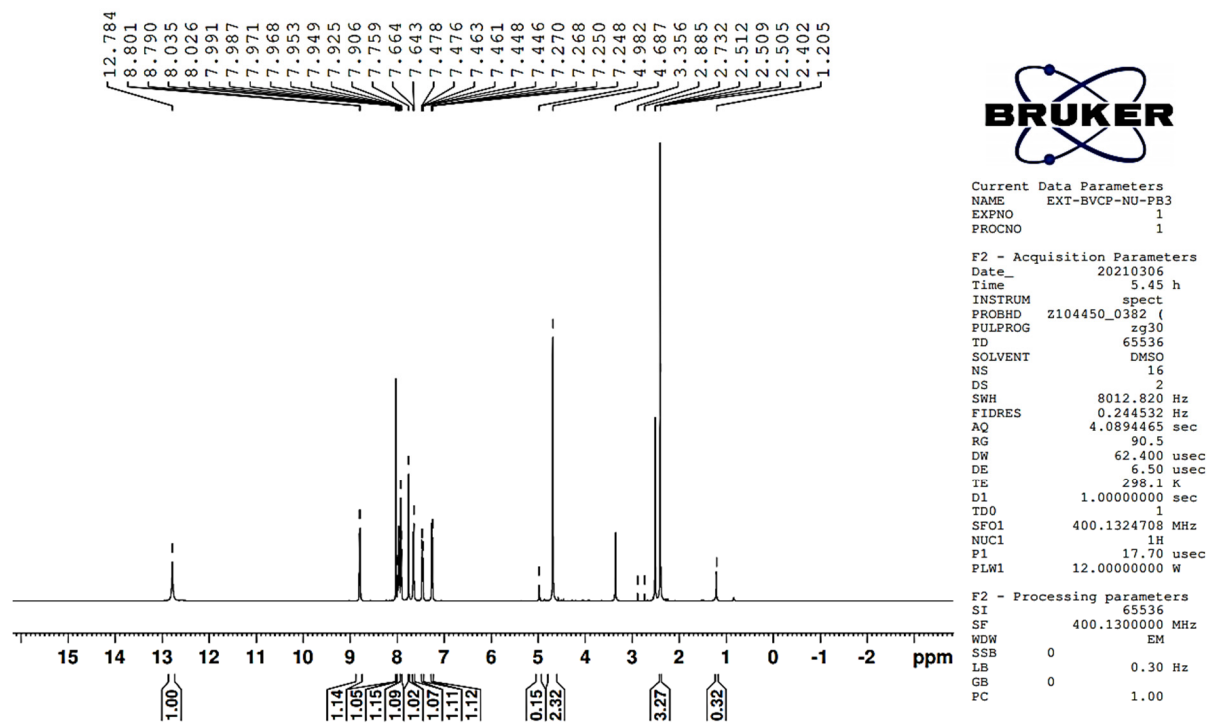

### 3. 13C-NMR

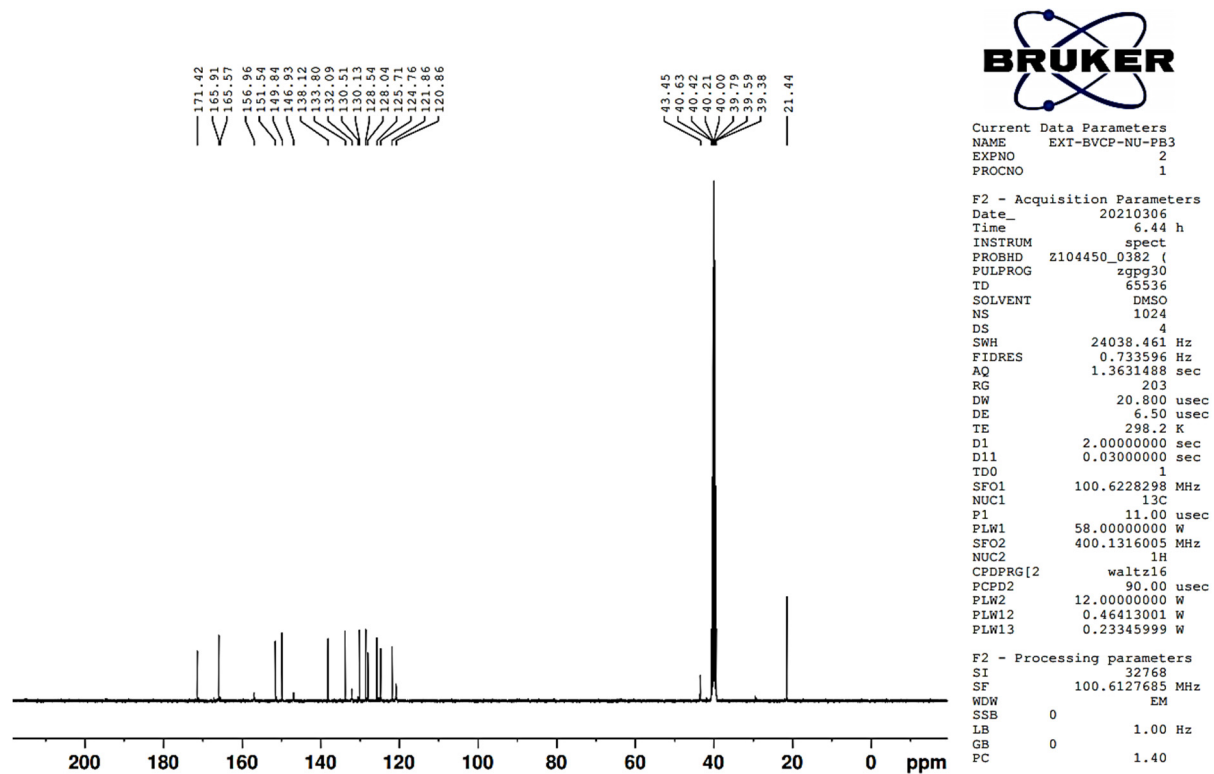

#### 4. HPLC

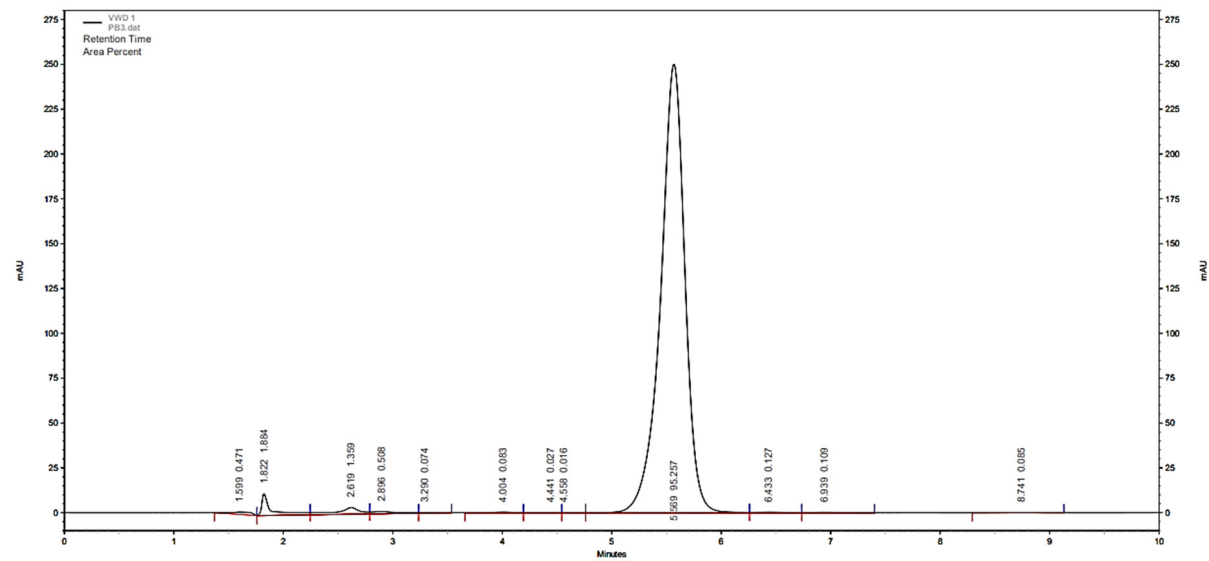

## 5. Mass



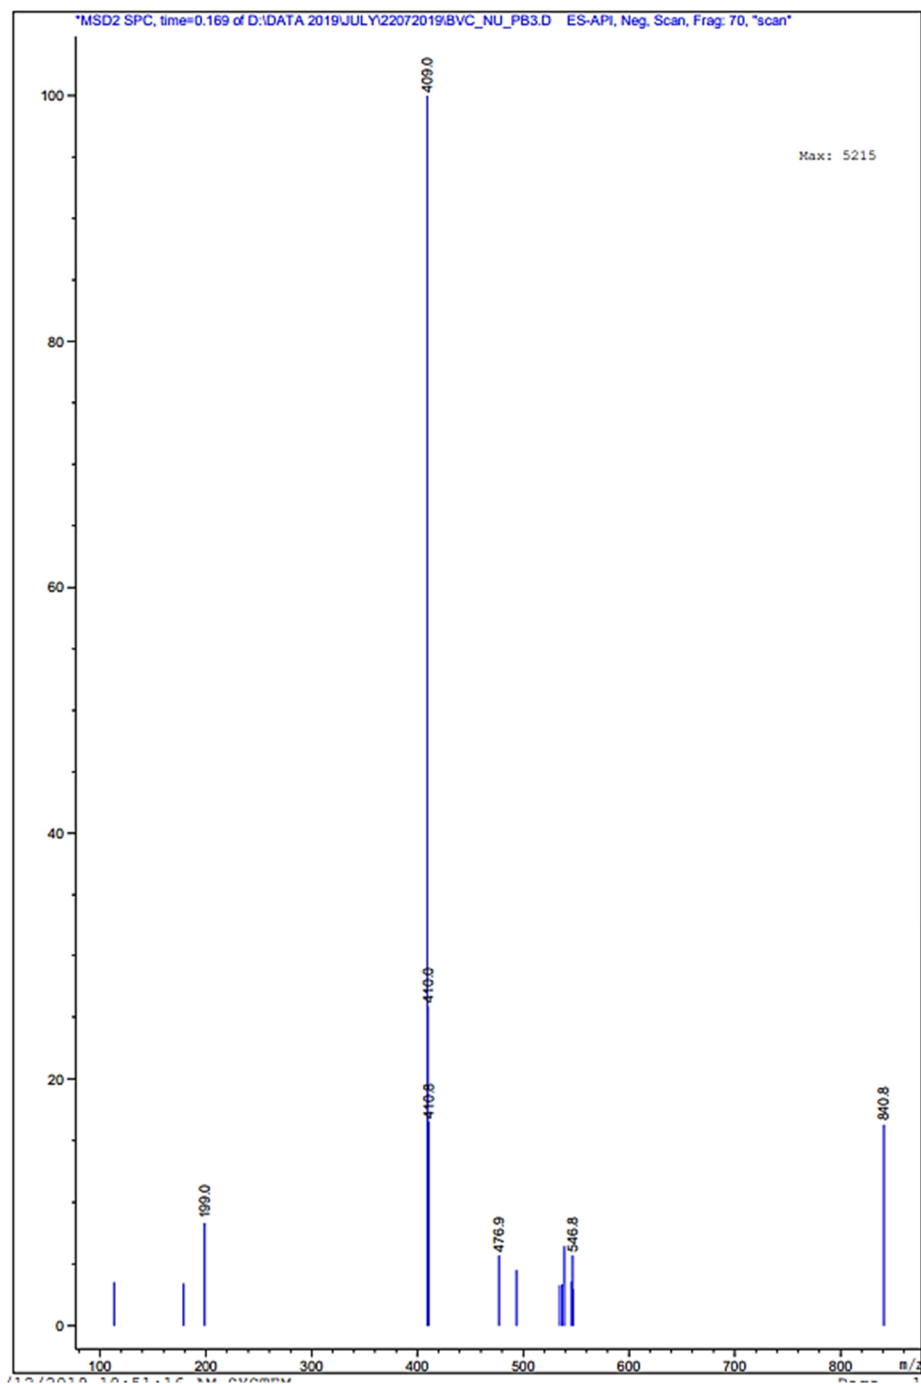

N-(4-chlorobenzo[d]thiazol-2-yl)-2-(2,4-dioxo-5-(pyridin-2-ylmethylene)thiazolidin-3-yl)acetamide (PB4)

## 1. FTIR

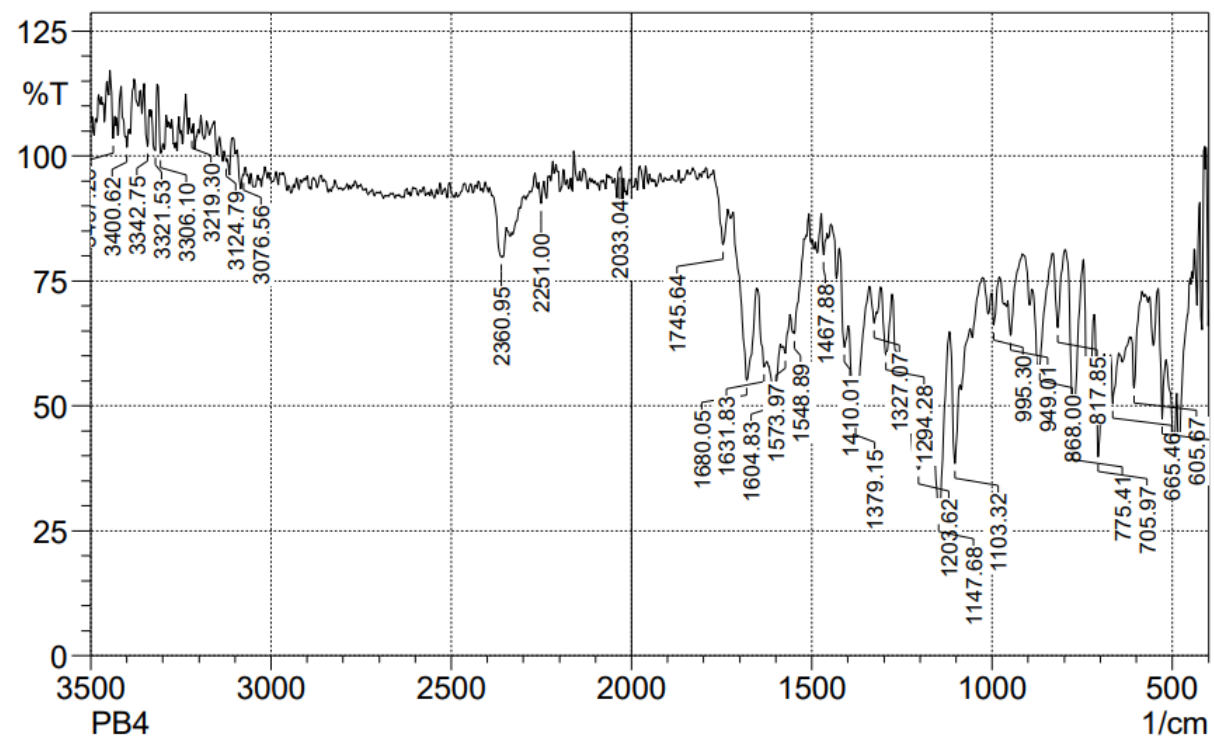

## 2. $^1\text{H}$ -NMR

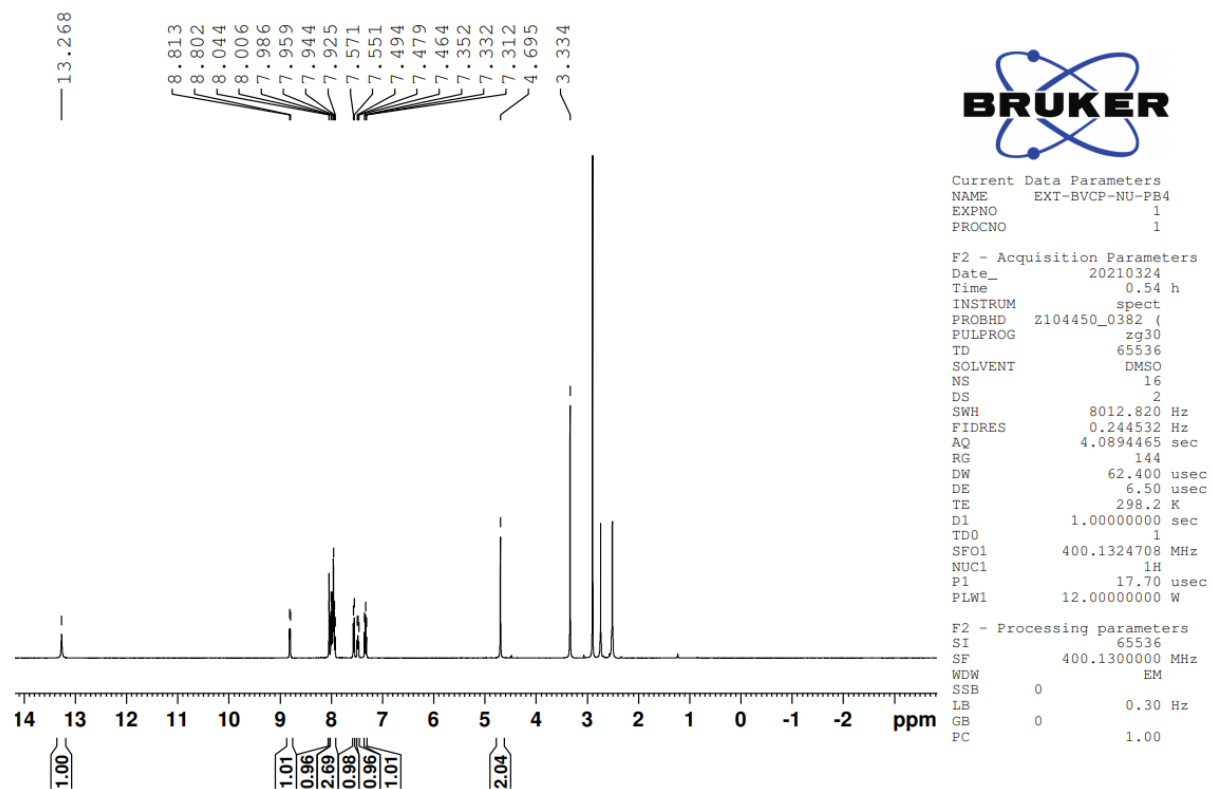

### 3. <sup>13</sup>C-NMR

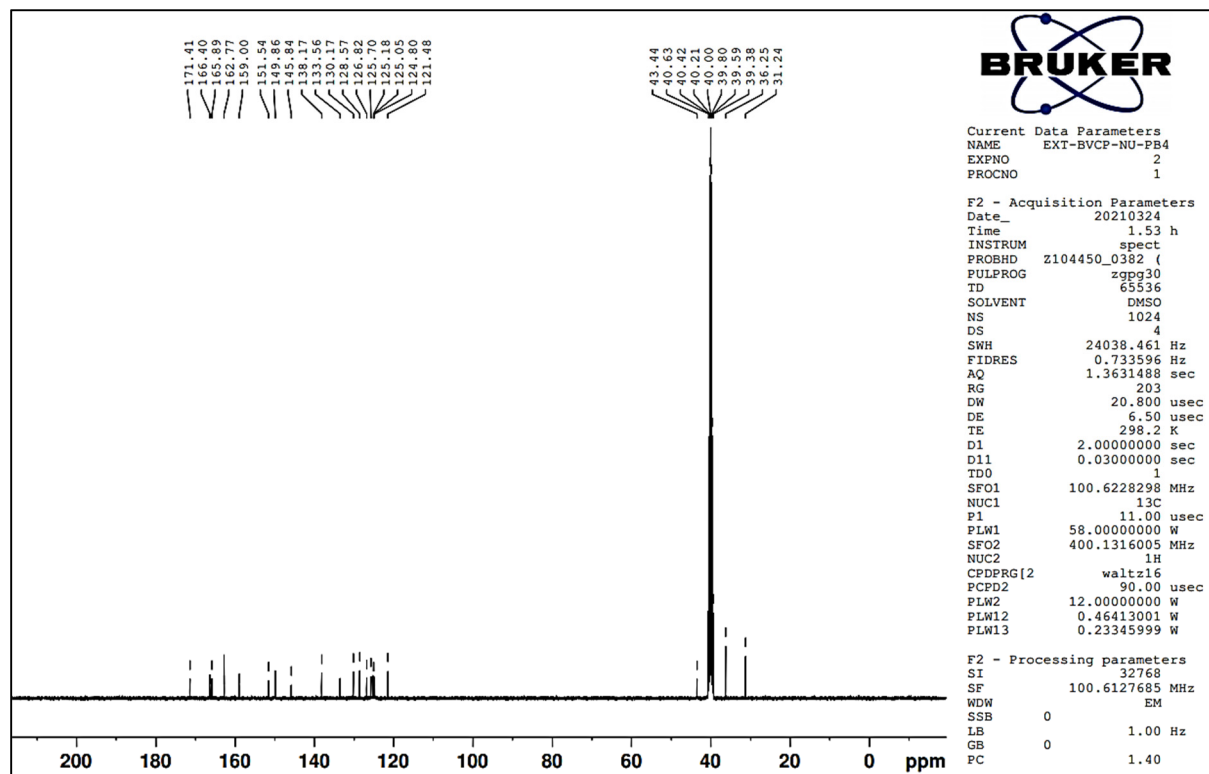

#### 4. HPLC

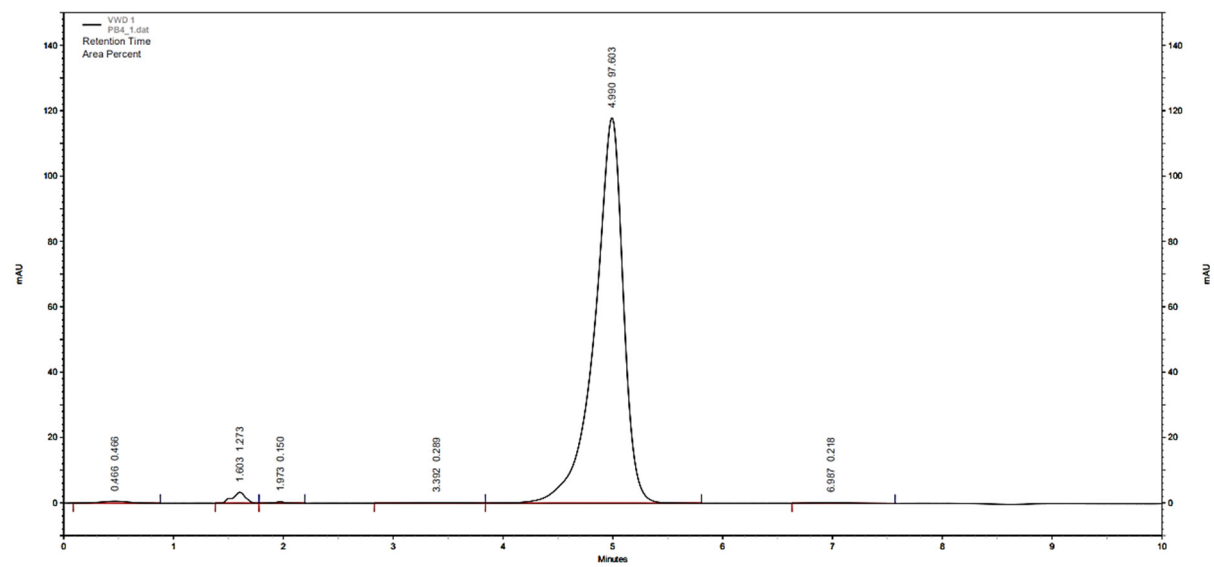

## 5. Mass

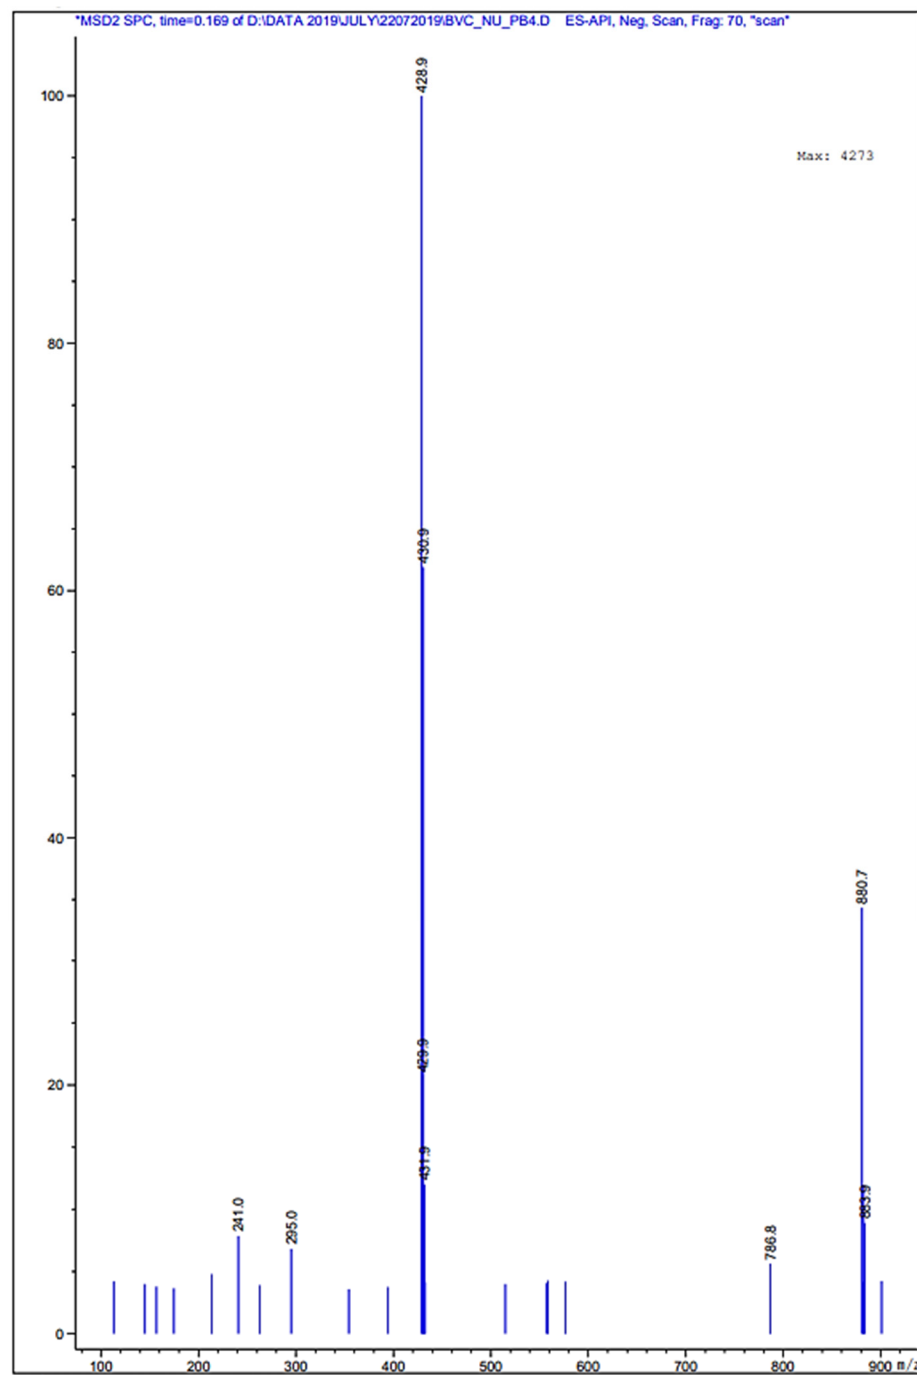

N-(4,6-difluorobenzo[d]thiazol-2-yl)-2-(2,4-dioxo-5-(pyridin-2-ylmethylene)thiazolidin-3-yl)acetamide (PB5)

1. FTIR

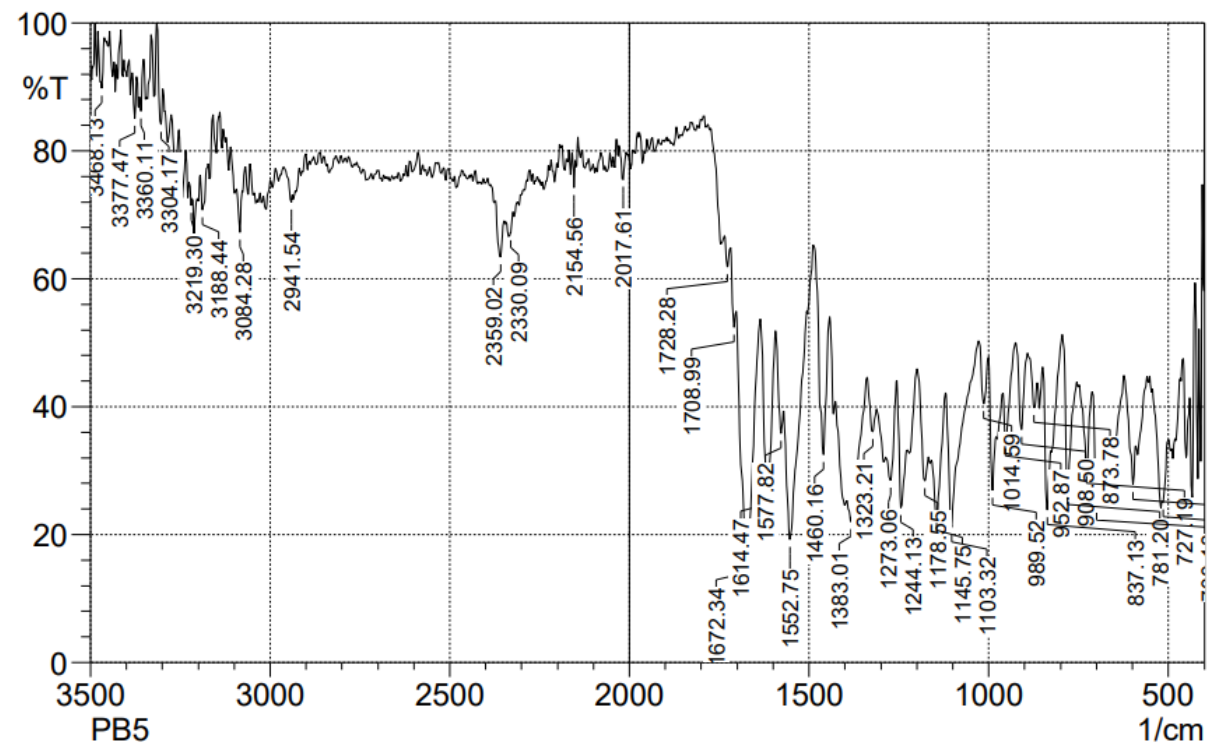

2.  $^1\text{H-NMR}$

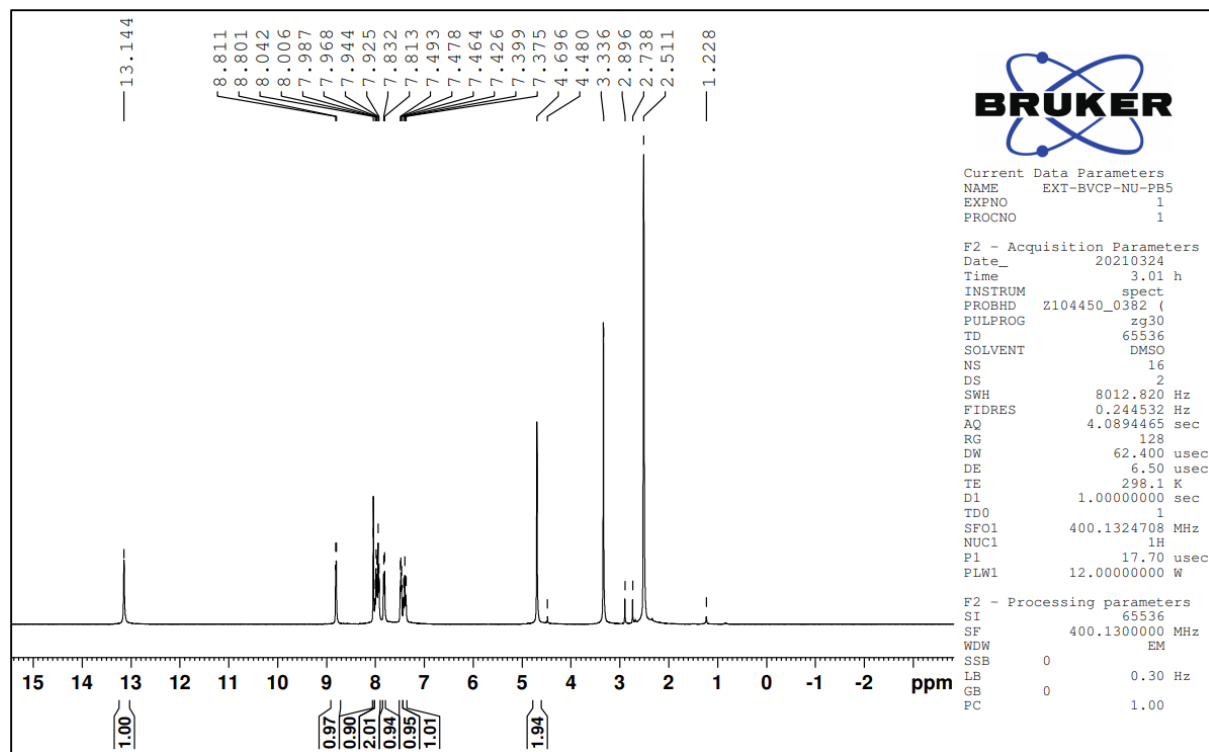

### 3. 13C-NMR



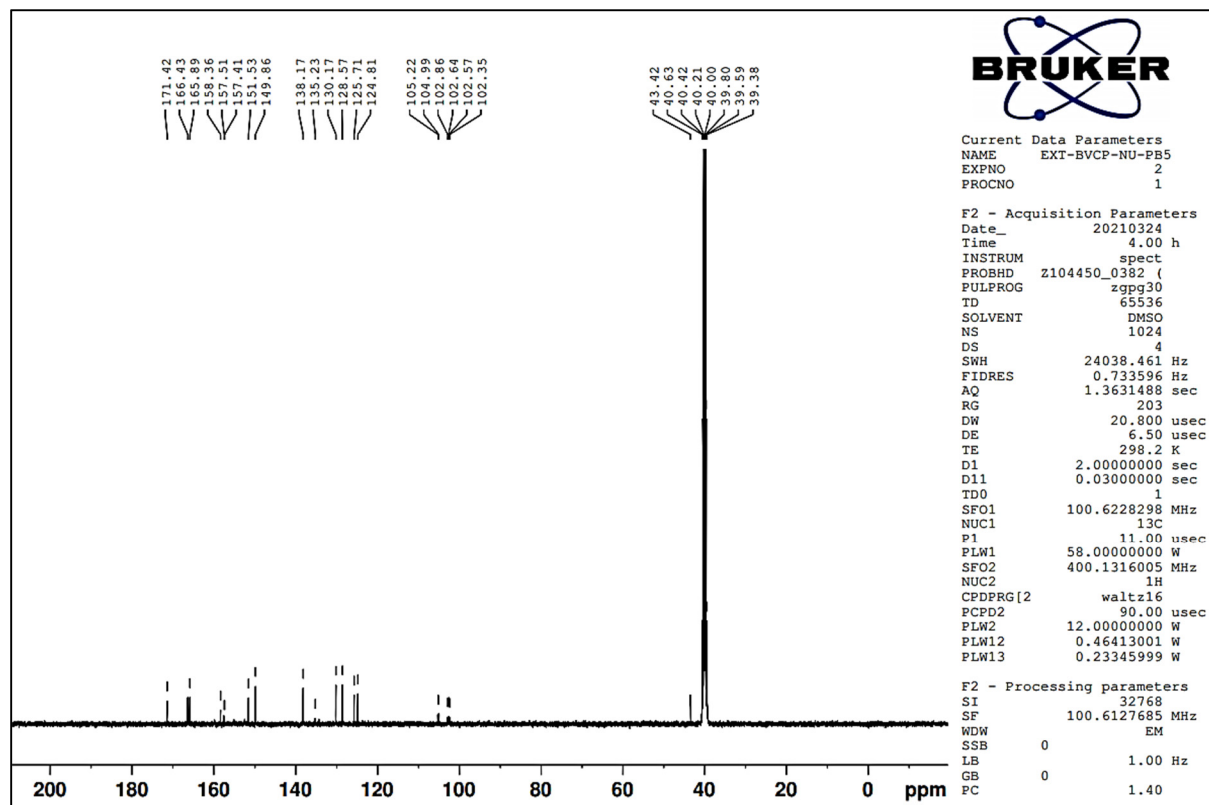

#### 4. HPLC

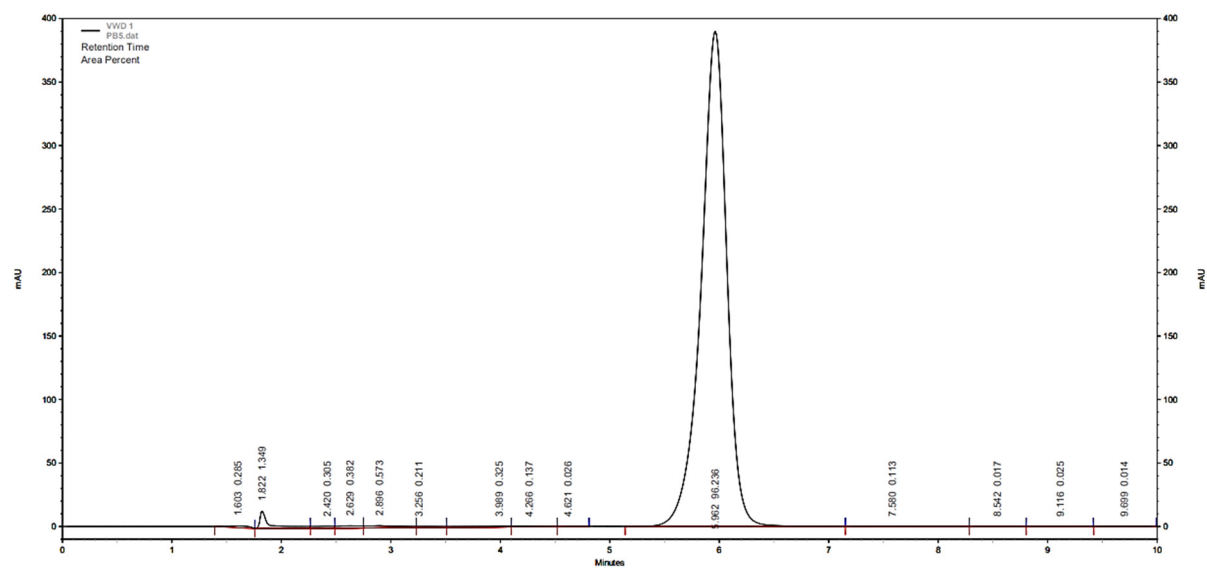

## 5. Mass

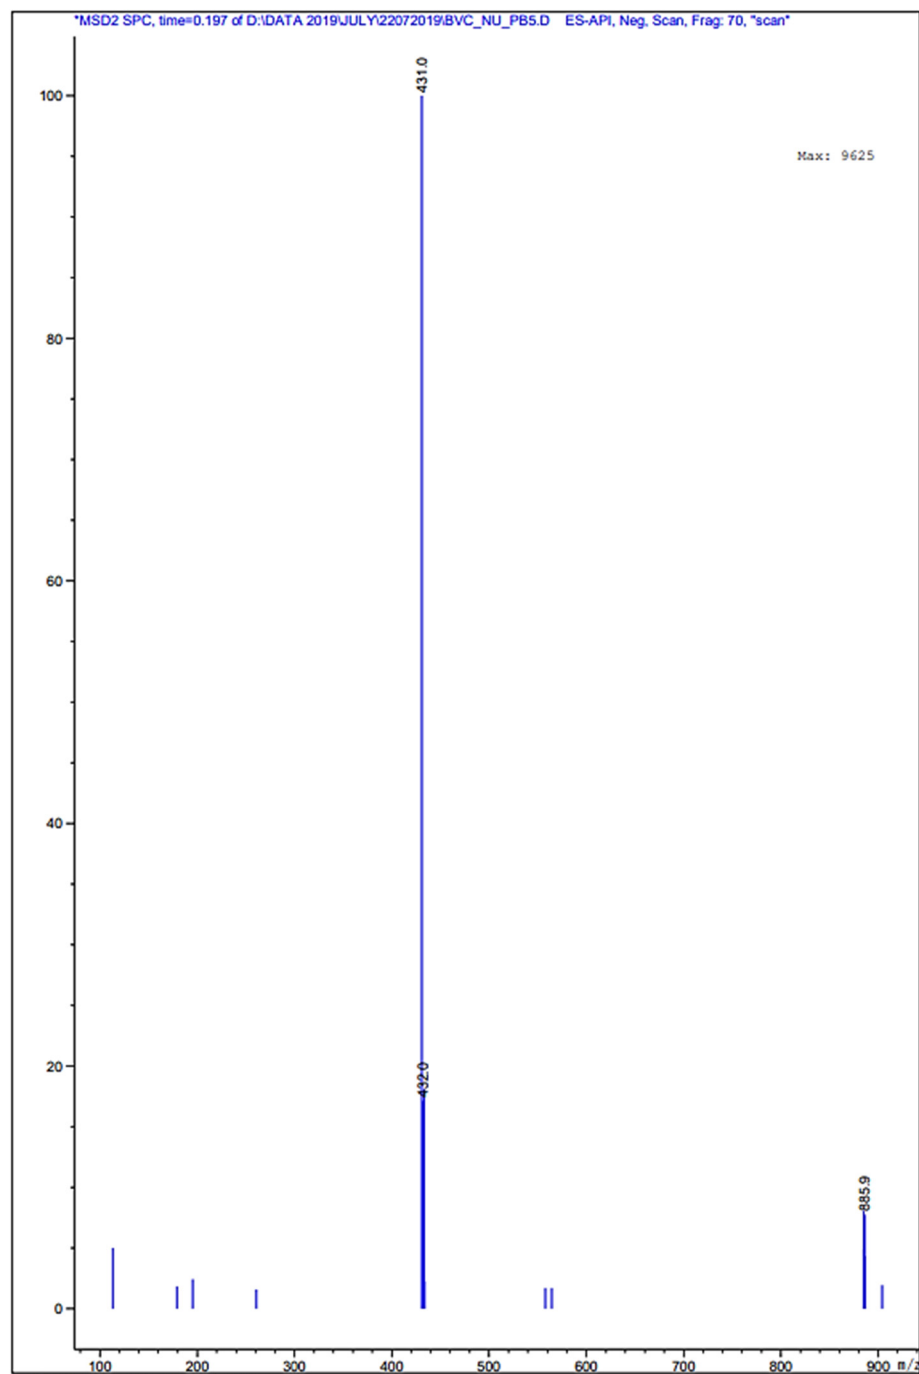

N-(5,6-dimethylbenzo[d]thiazol-2-yl)-2-(2,4-dioxo-5-(pyridin-2-ylmethylene)thiazolidin-3-yl)acetamide (PB6)

1. FTIR

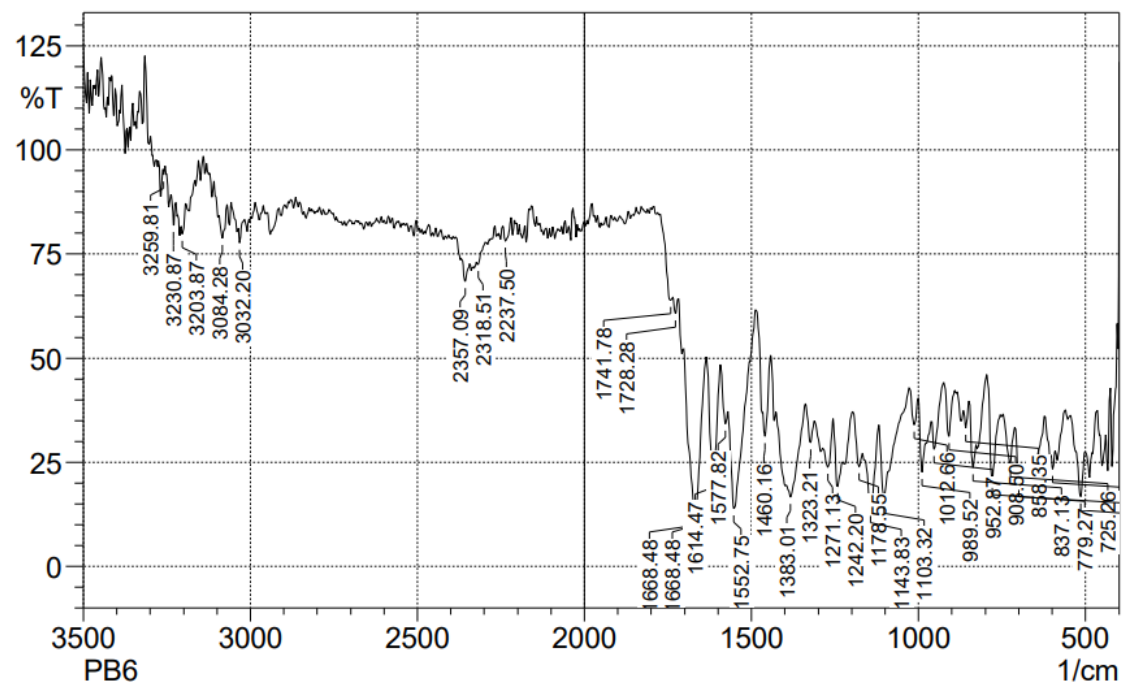

2. <sup>1</sup>H-NMR

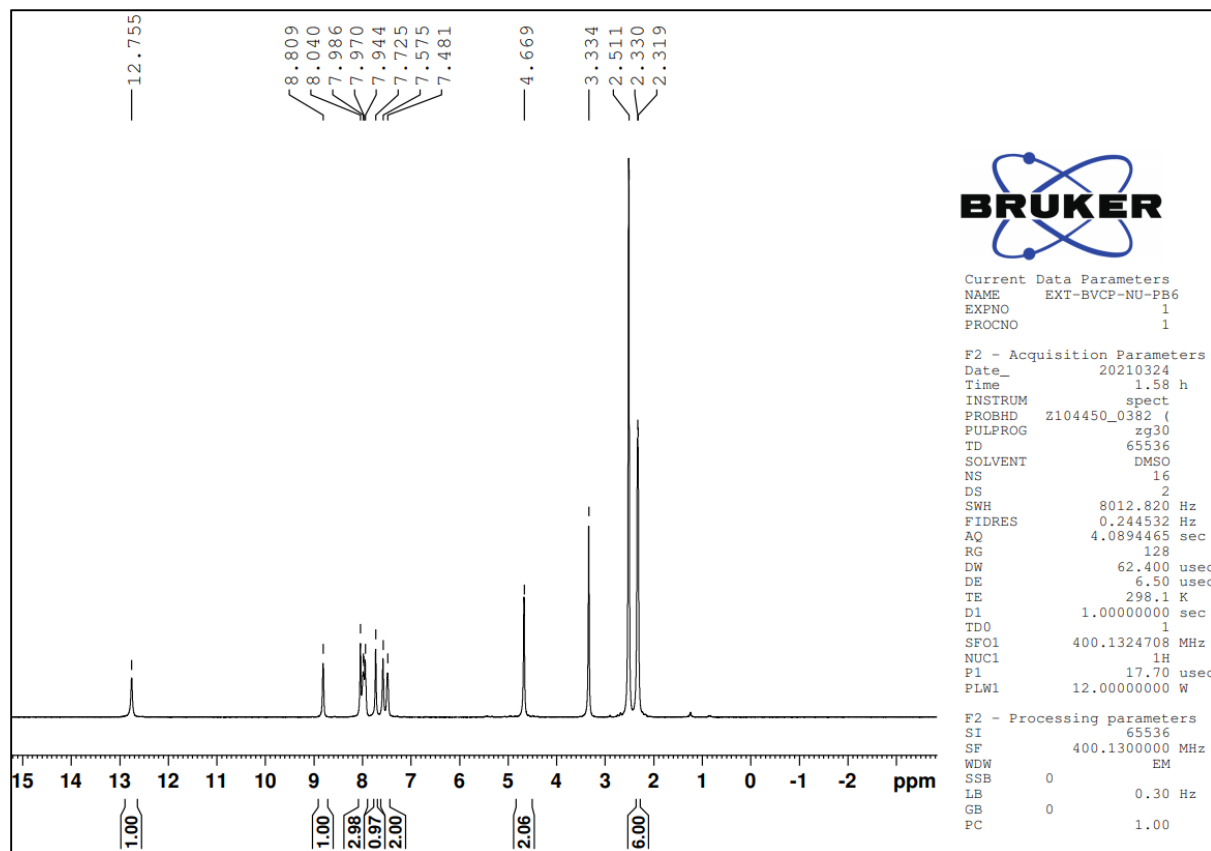

### 3. <sup>13</sup>C-NMR

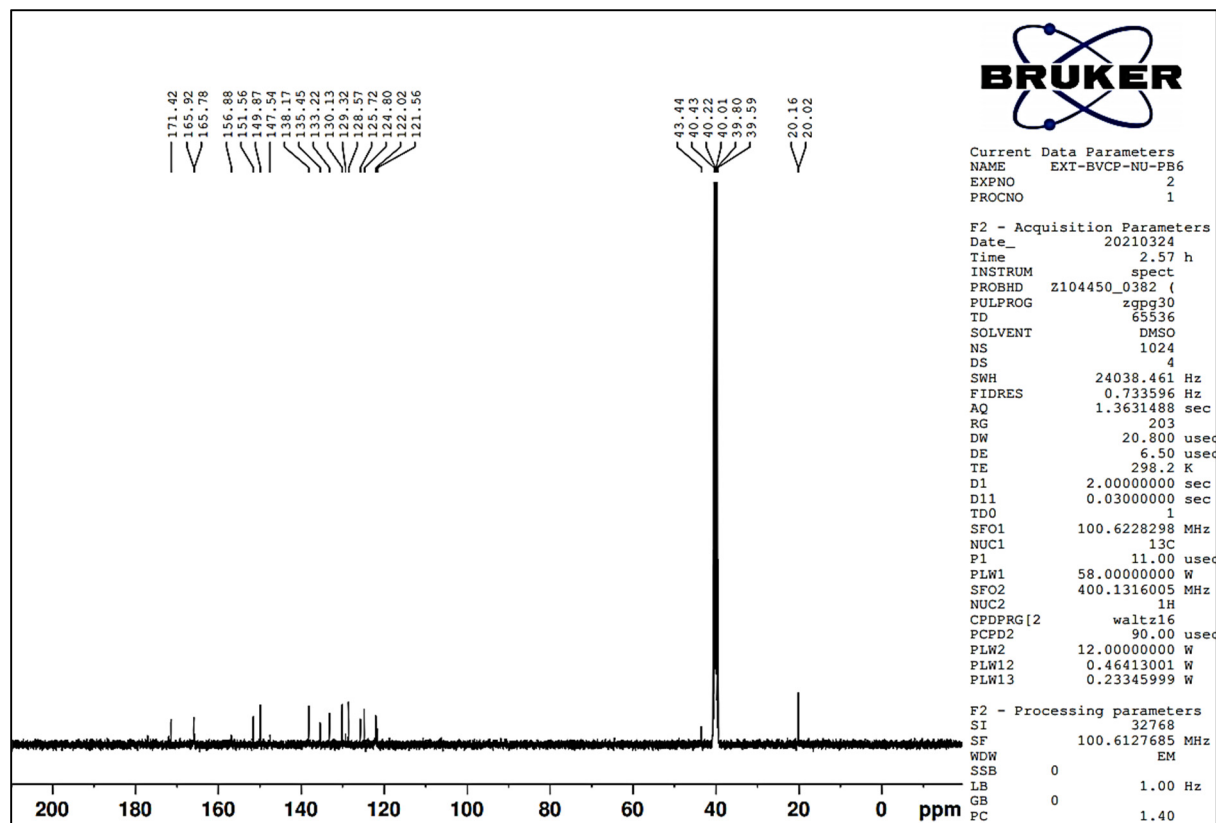

#### 4. HPLC

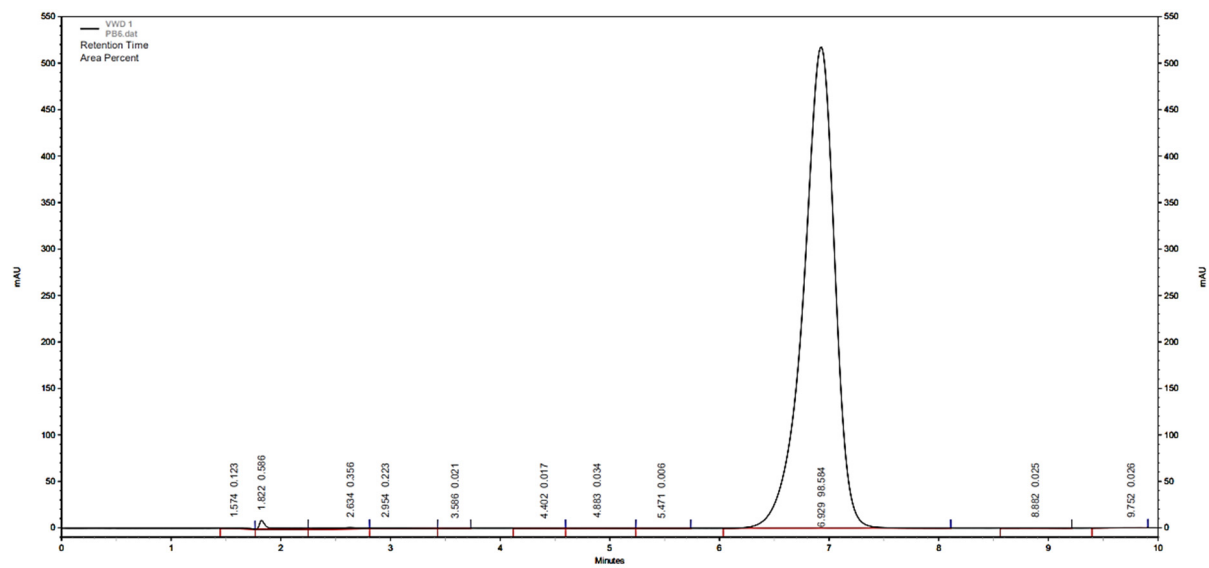

## 5. Mass

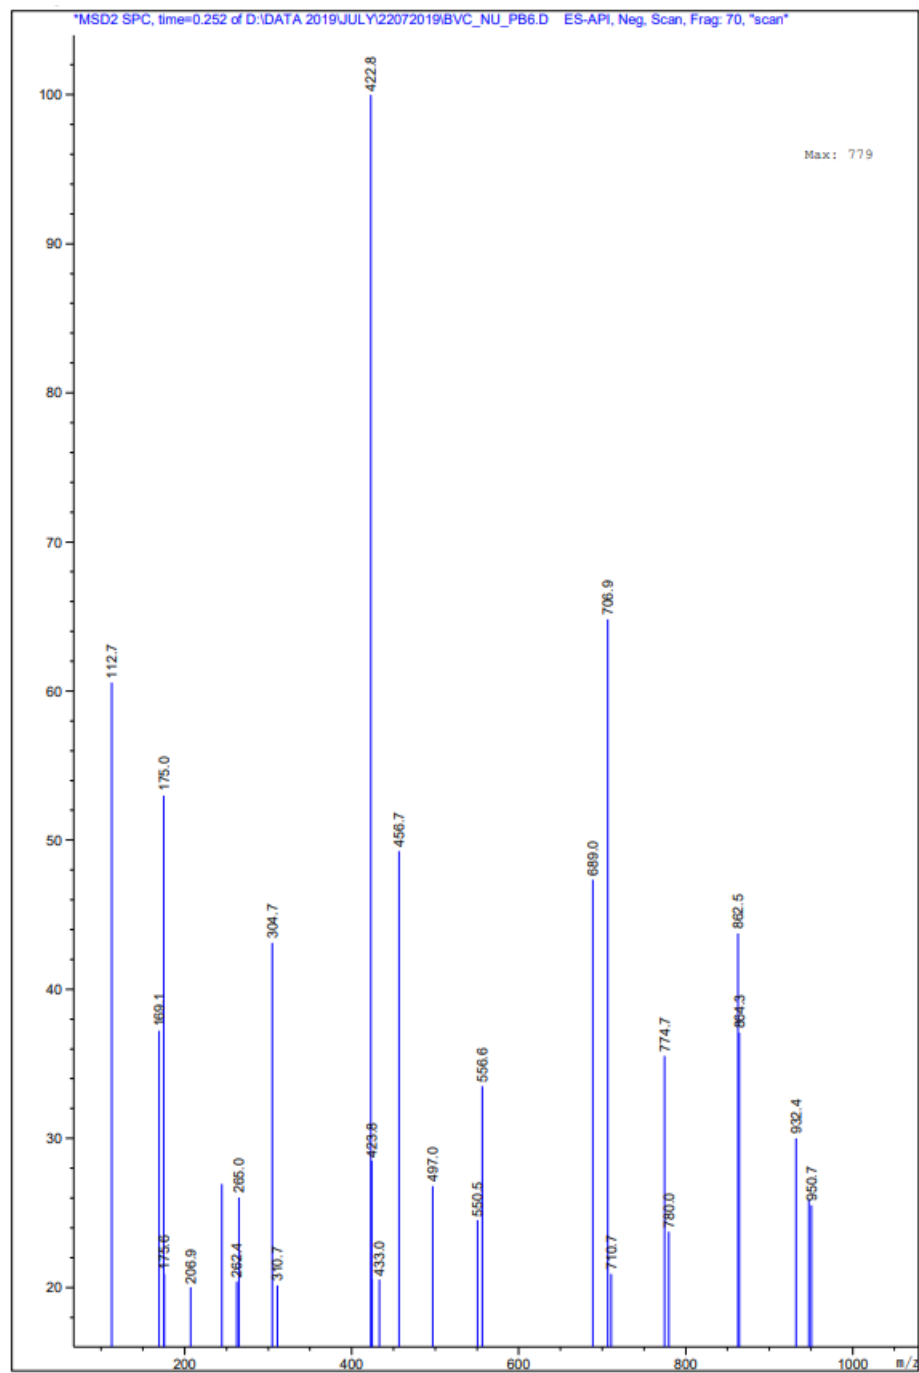



2-(2,4-dioxo-5-(pyridin-2-ylmethylene)thiazolidin-3-yl)-N-(4-methoxybenzo[d]thiazol-2-yl)acetamide (PB7)

1. FTIR

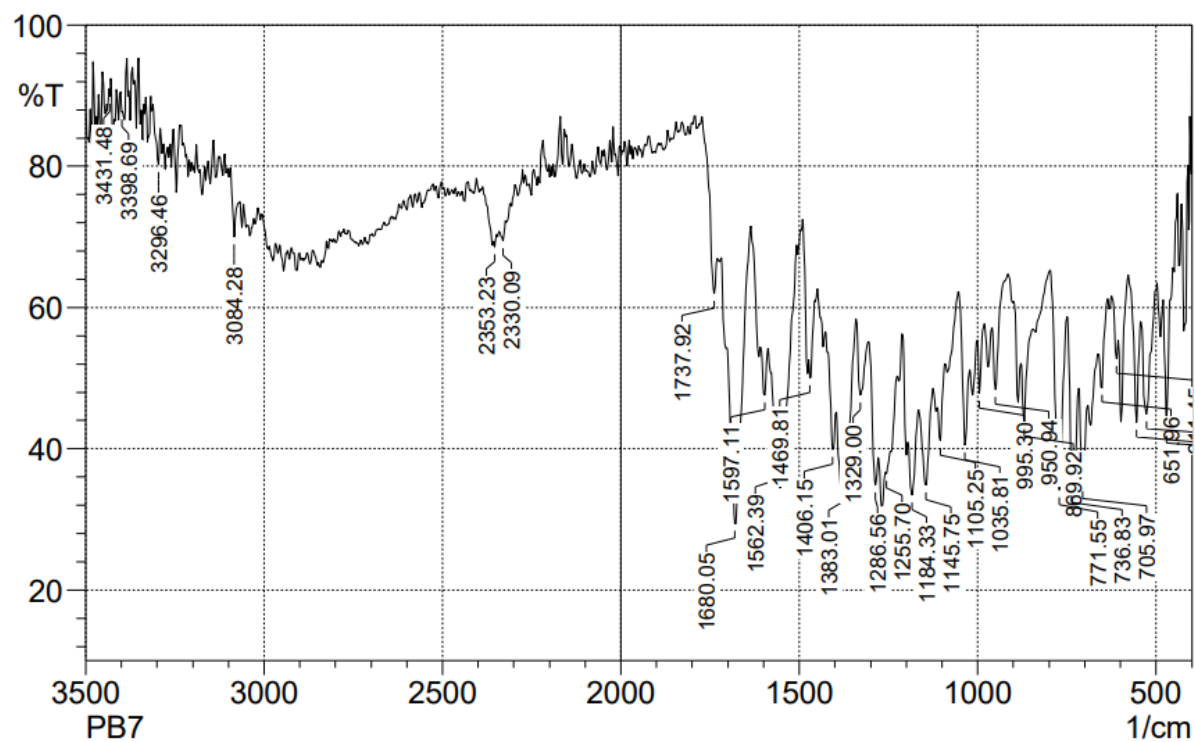

2. <sup>1</sup>H-NMR

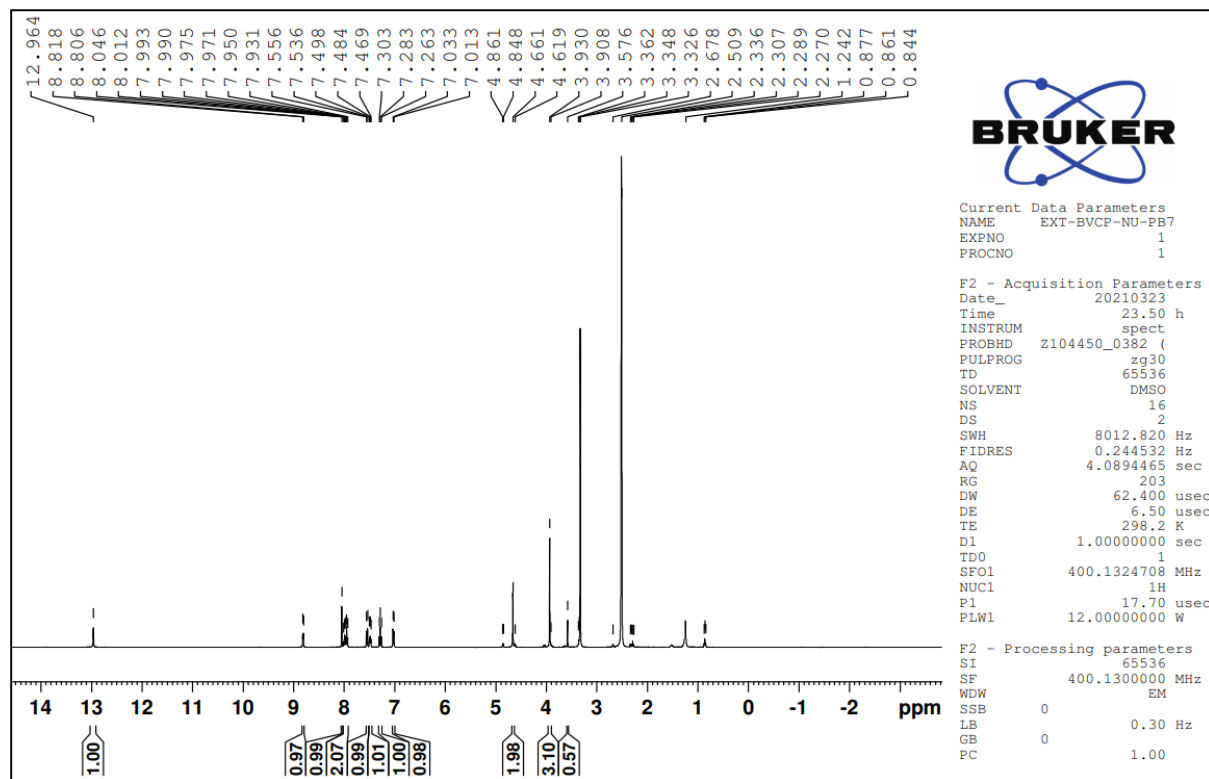

### 3. <sup>13</sup>C-NMR

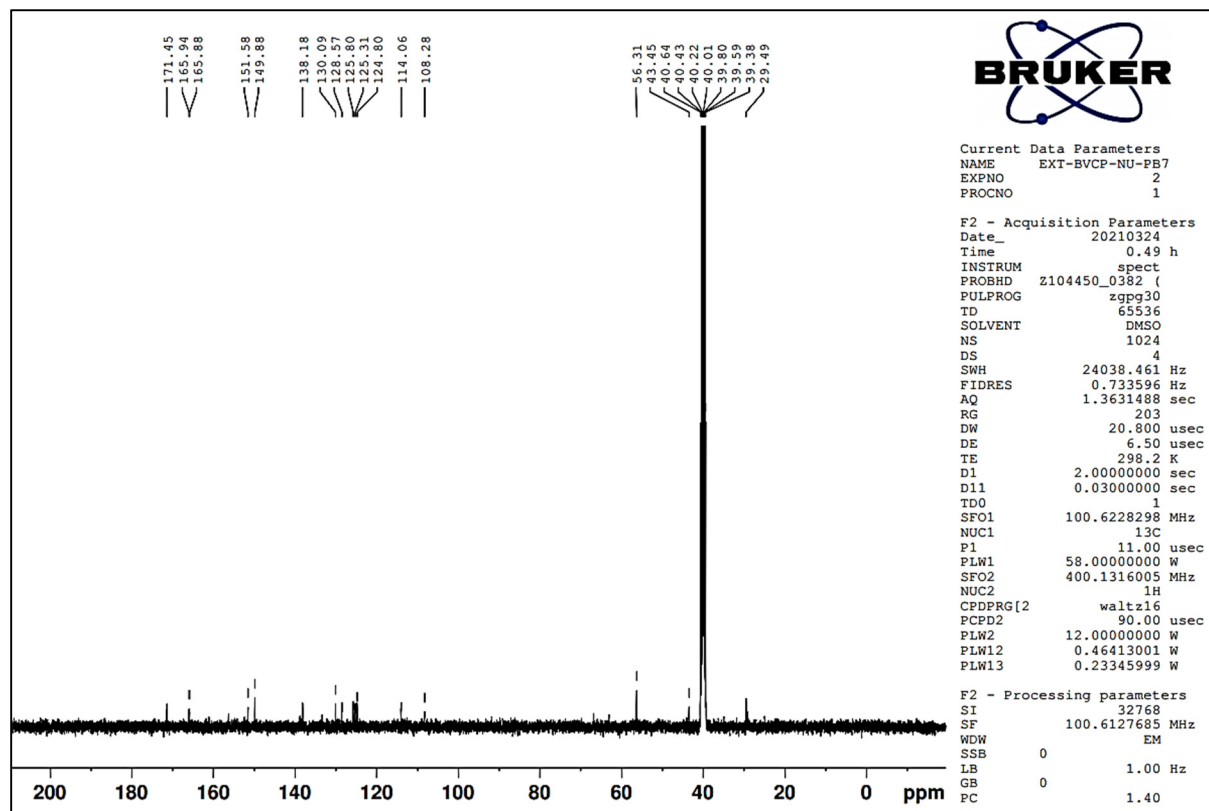

#### 4. HPLC

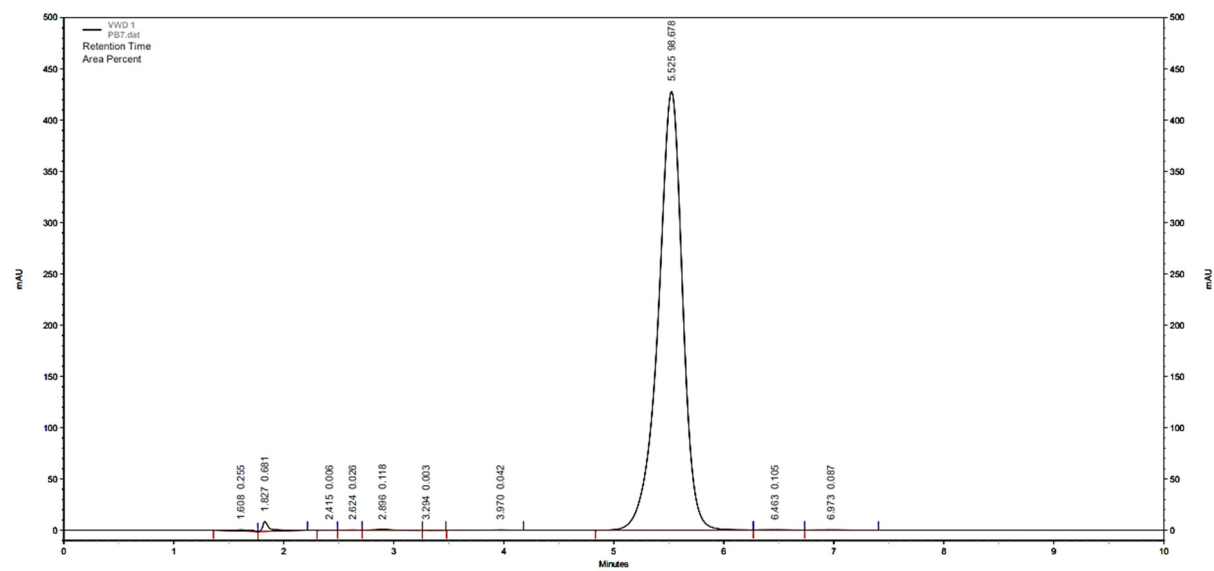

## 5. Mass

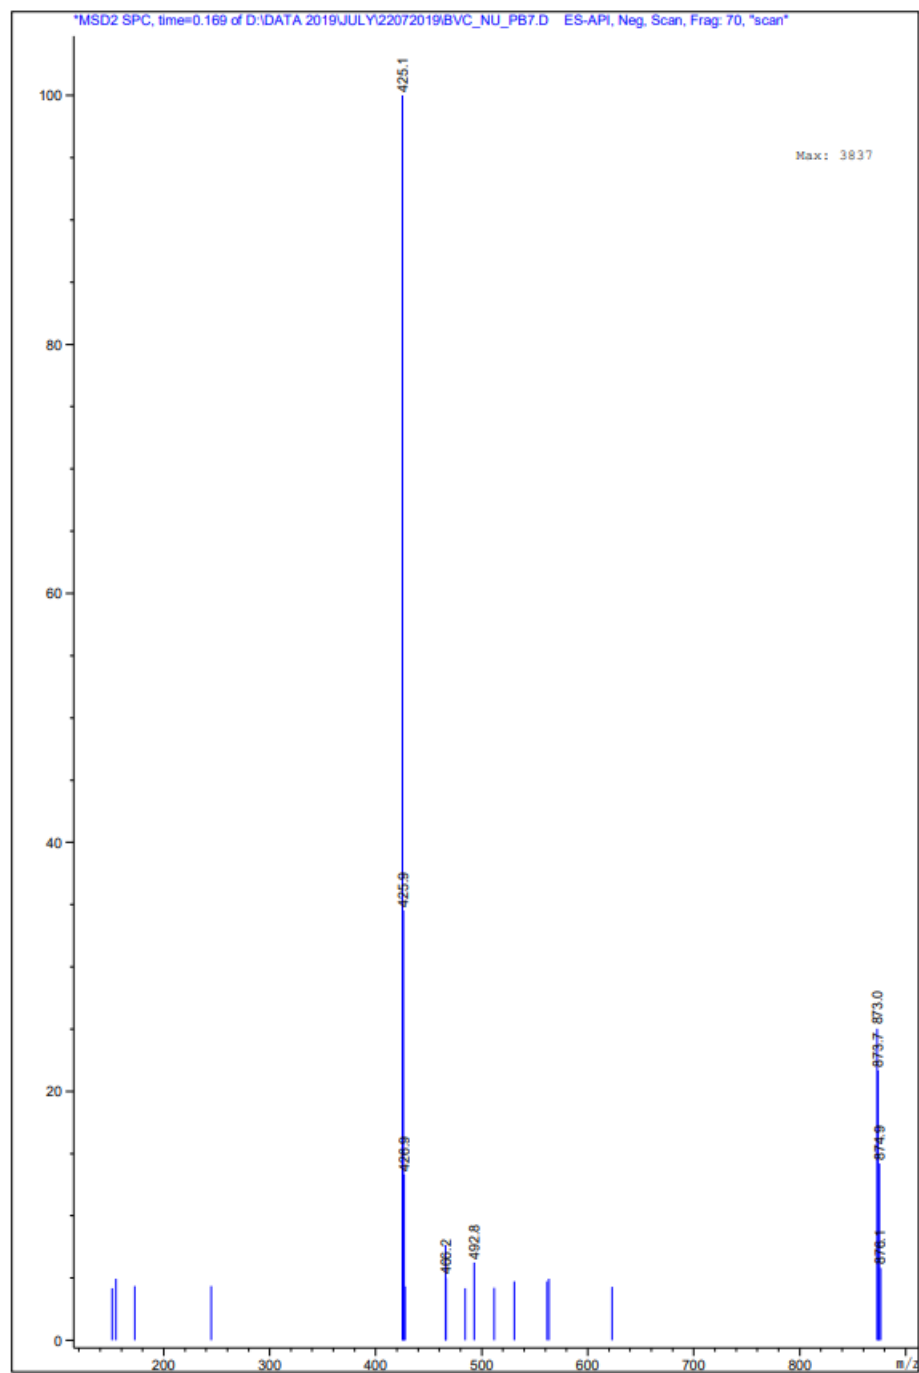

2-(2,4-dioxo-5-(pyridin-2-ylmethylene)thiazolidin-3-yl)-N-(6-ethoxybenzo[d]thiazol-2-yl)acetamide (PB8)

1. FTIR

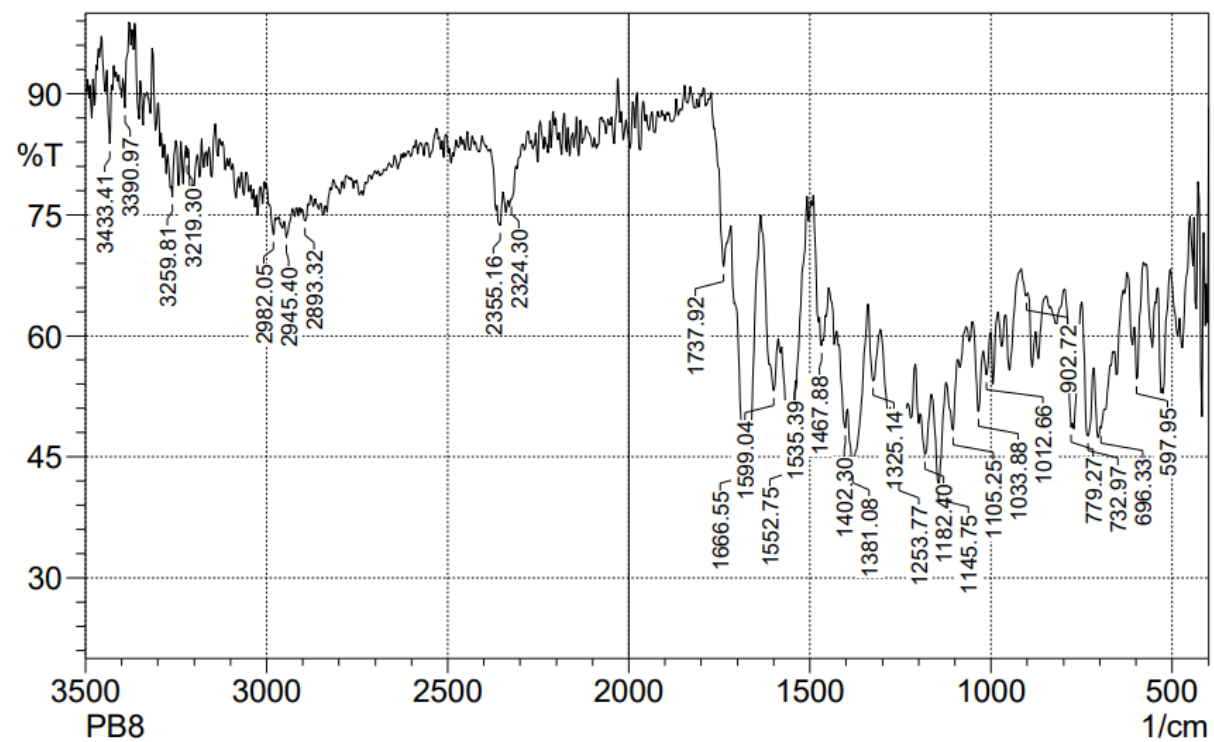

2. <sup>1</sup>H-NMR

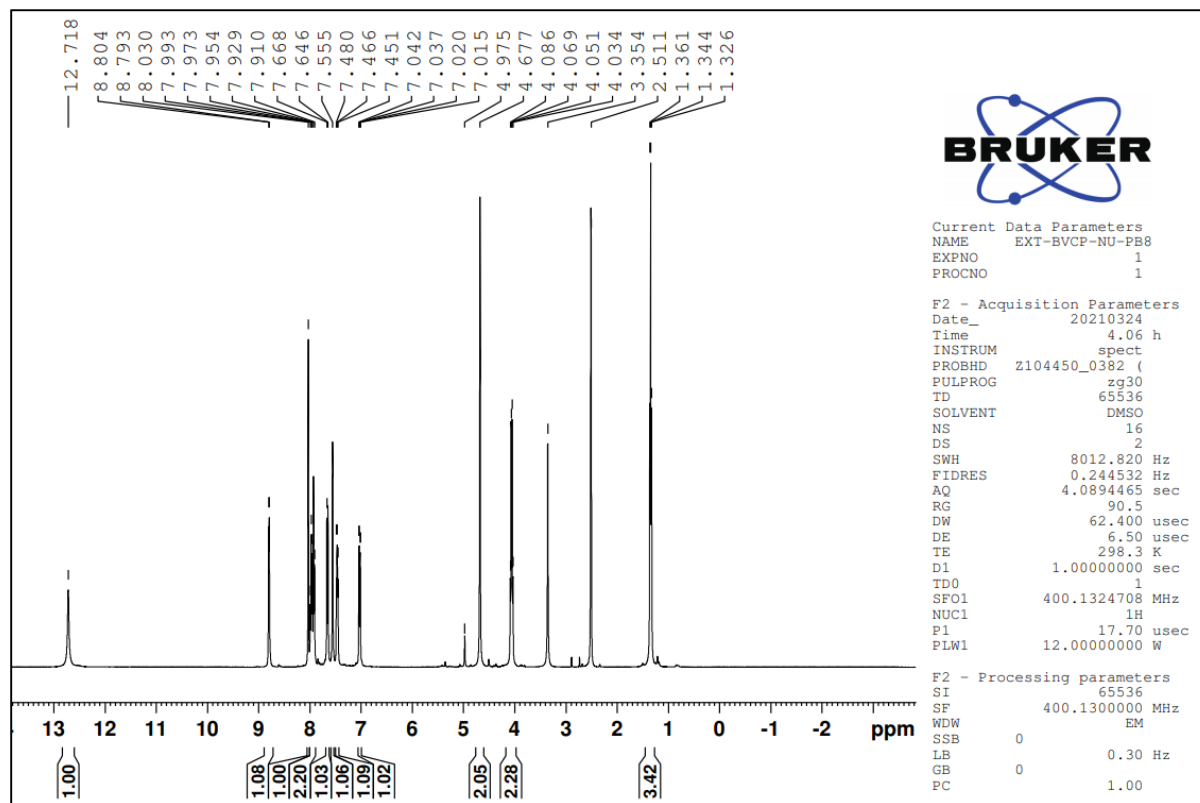

### 3. 13C-NMR

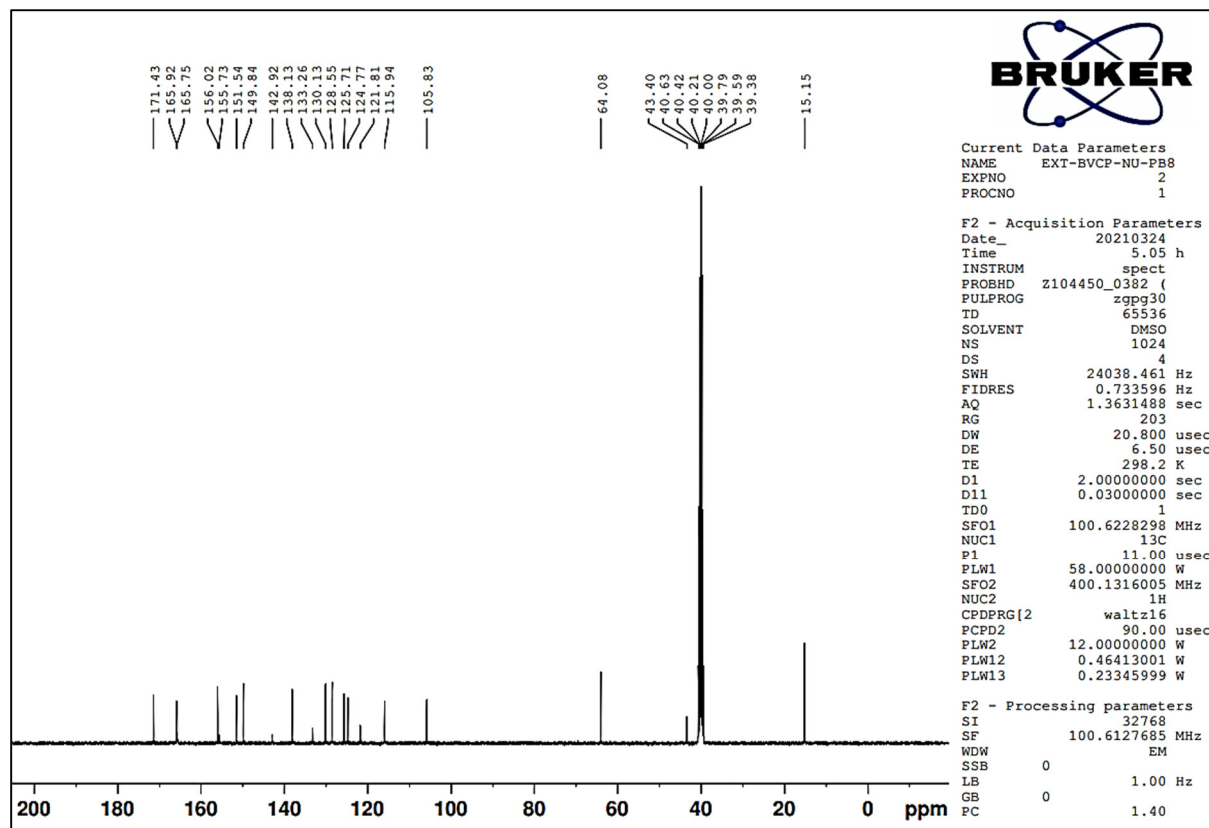

#### 4. HPLC



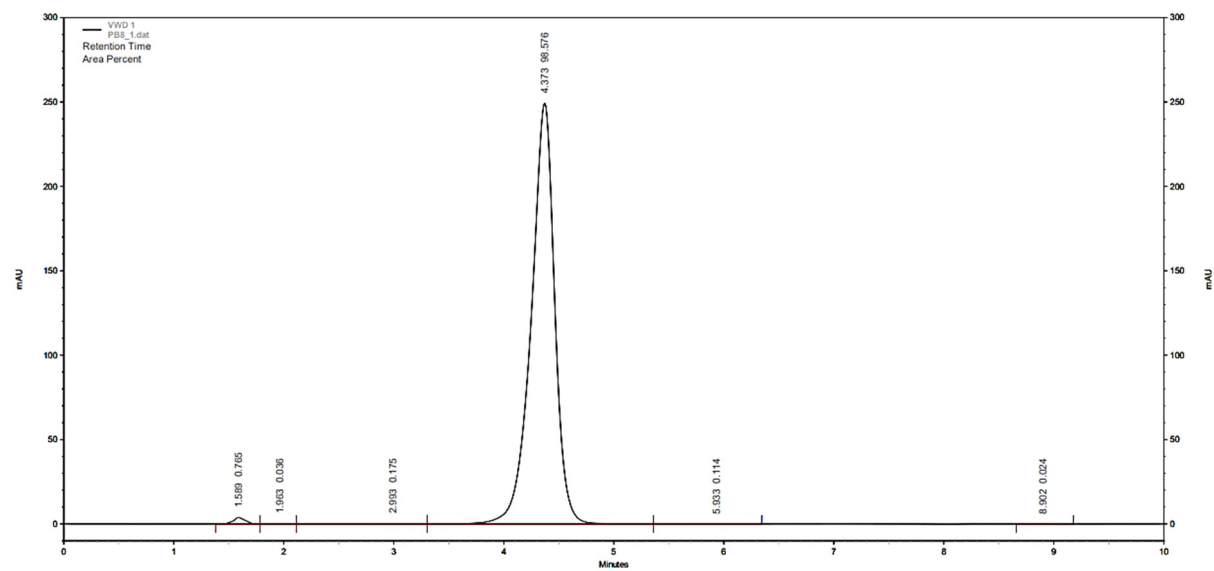

## 5. Mass

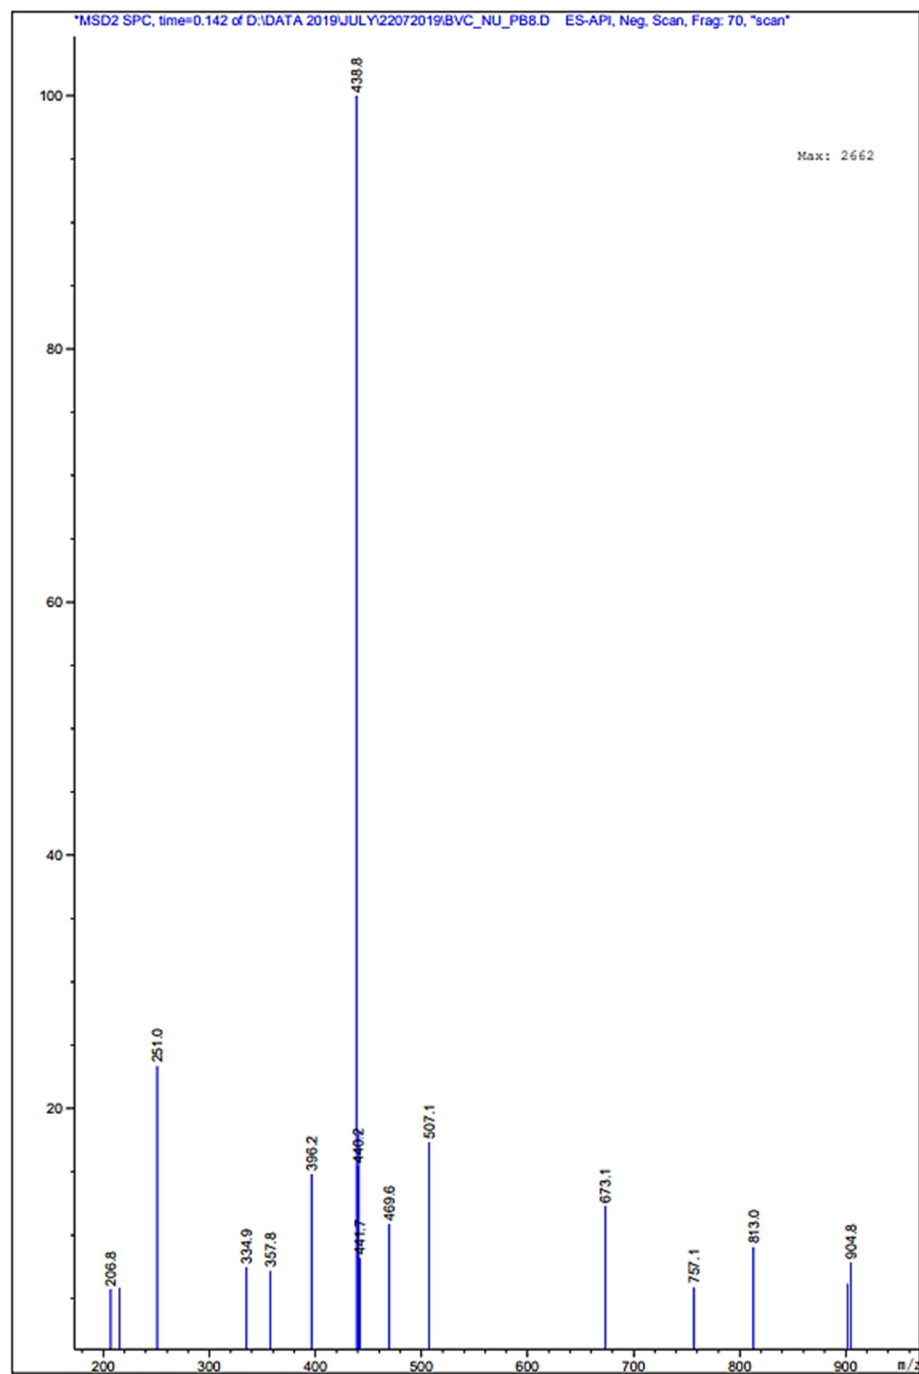

2-(2,4-dioxo-5-(pyridin-2-ylmethylene)thiazolidin-3-yl)-N-(6-fluorobenzo[d]thiazol-2-yl)acetamide (PB9)

1. FTIR

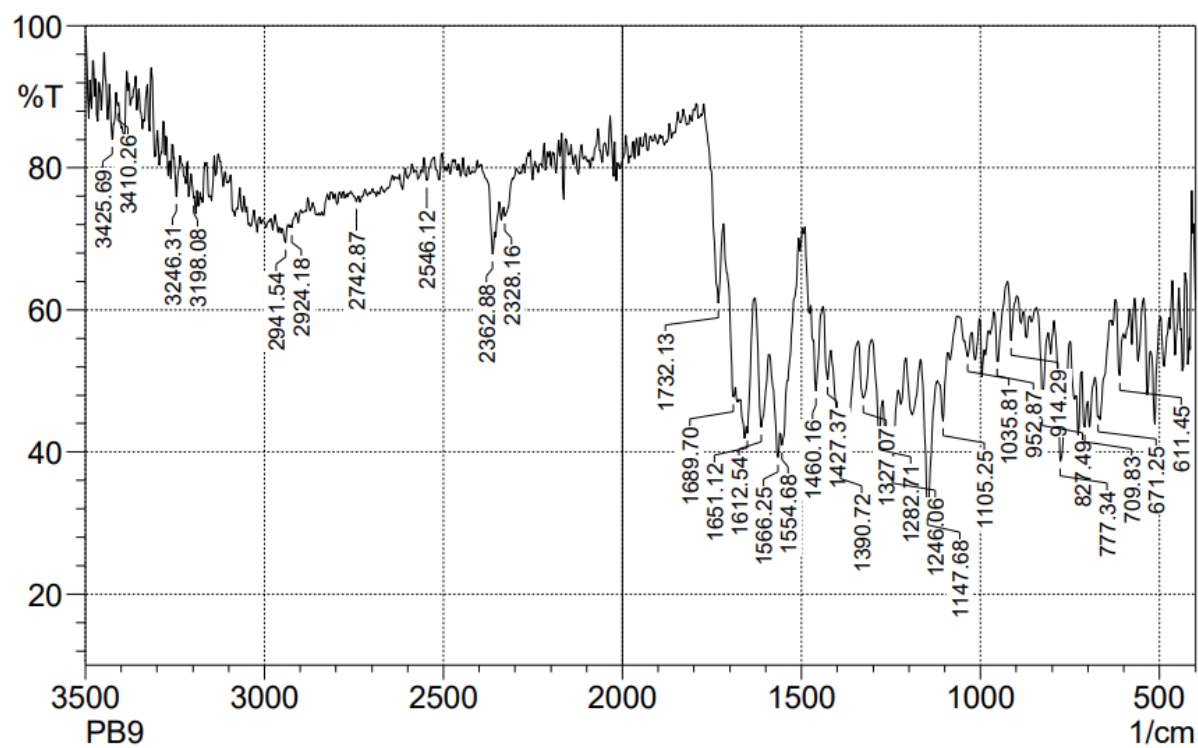

2. <sup>1</sup>H-NMR

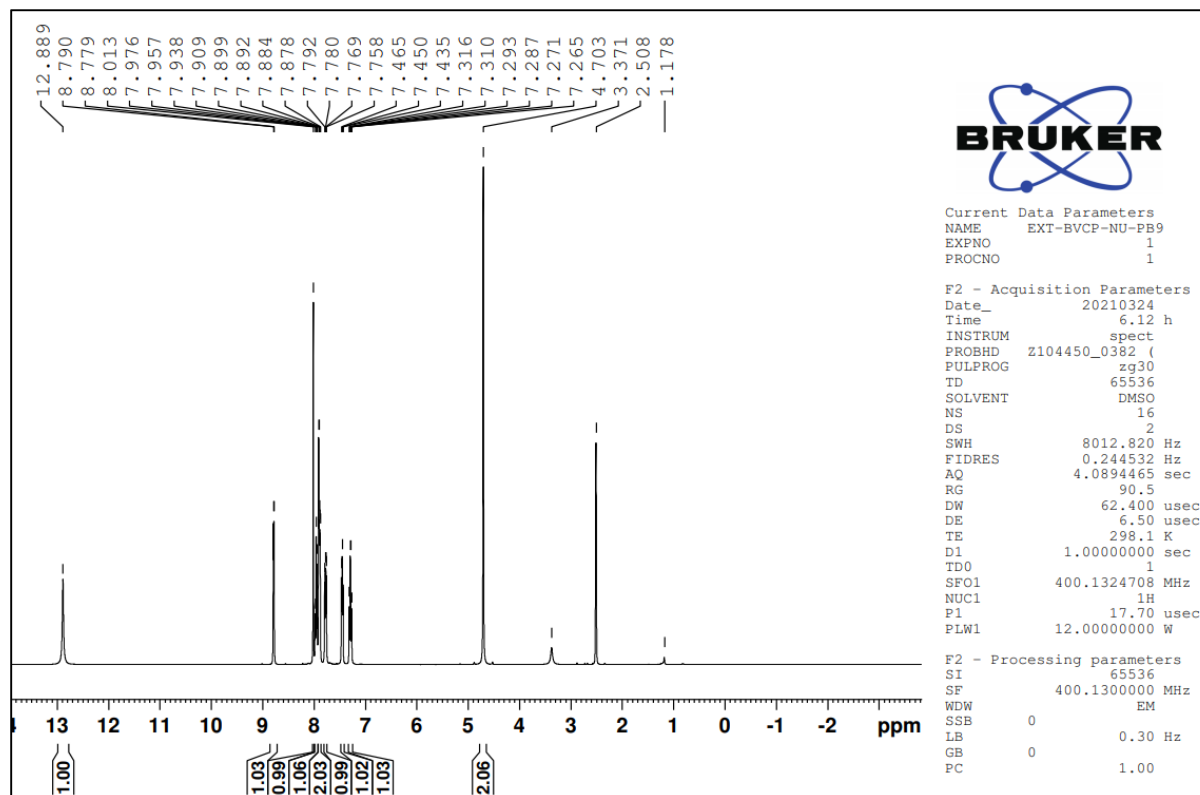

### 3. 13C-NMR

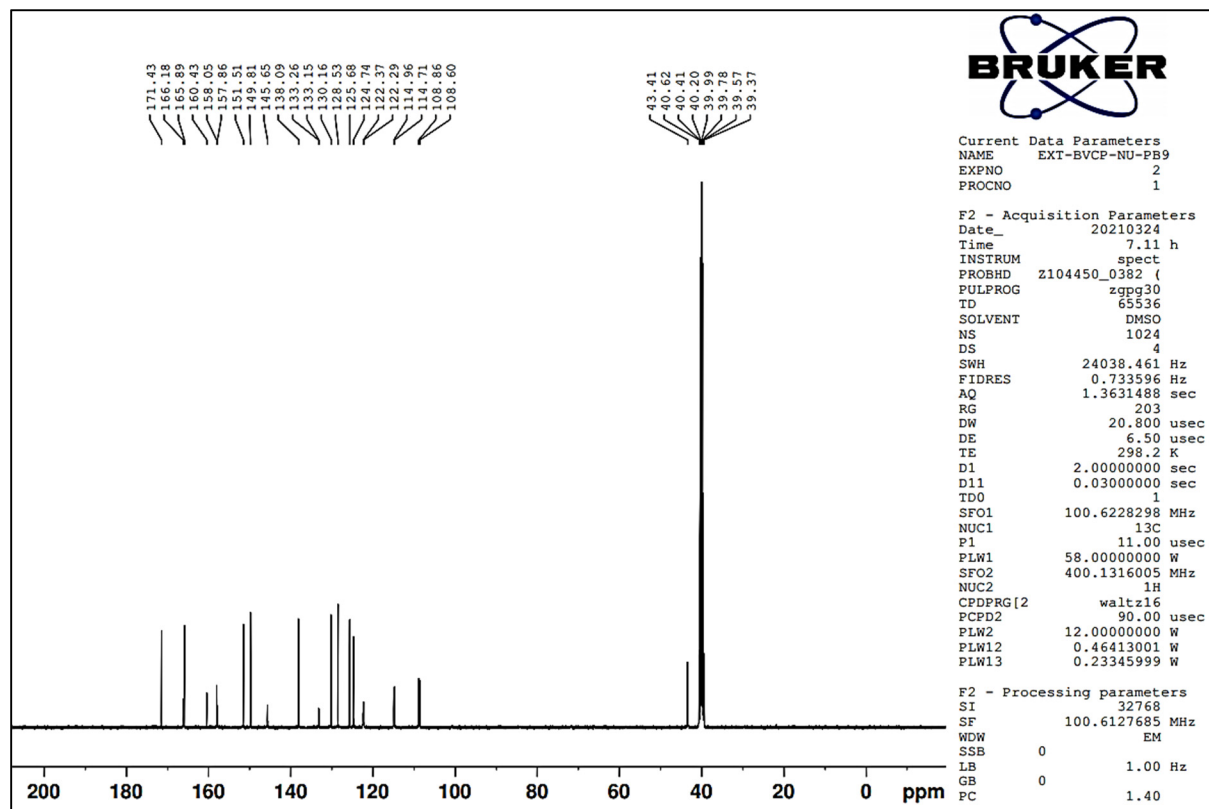

#### 4. HPLC

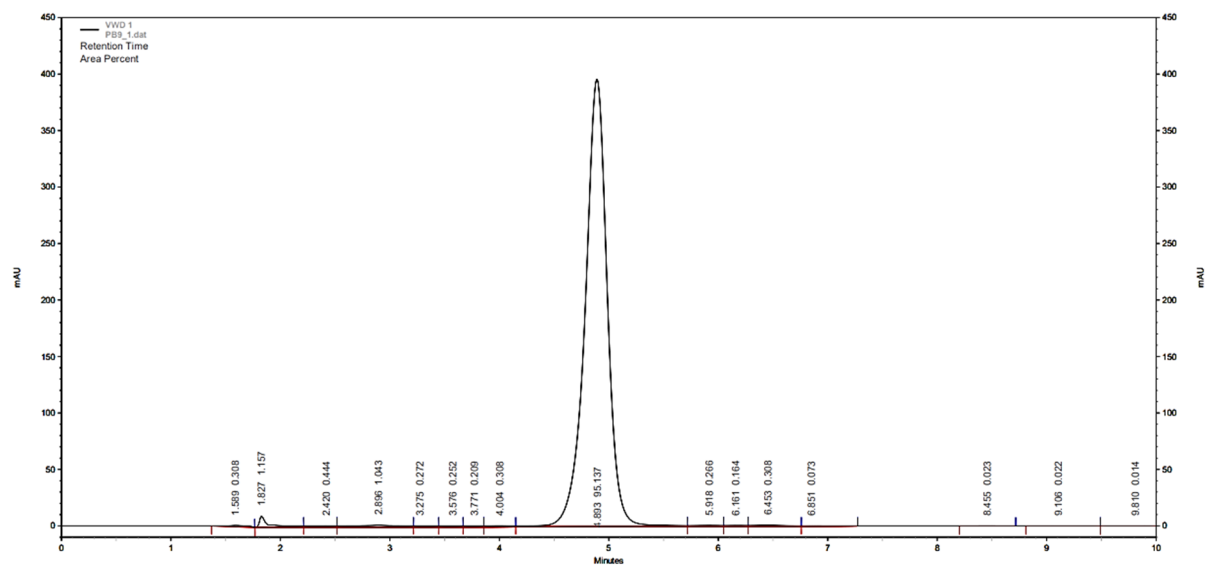

## 5. Mass

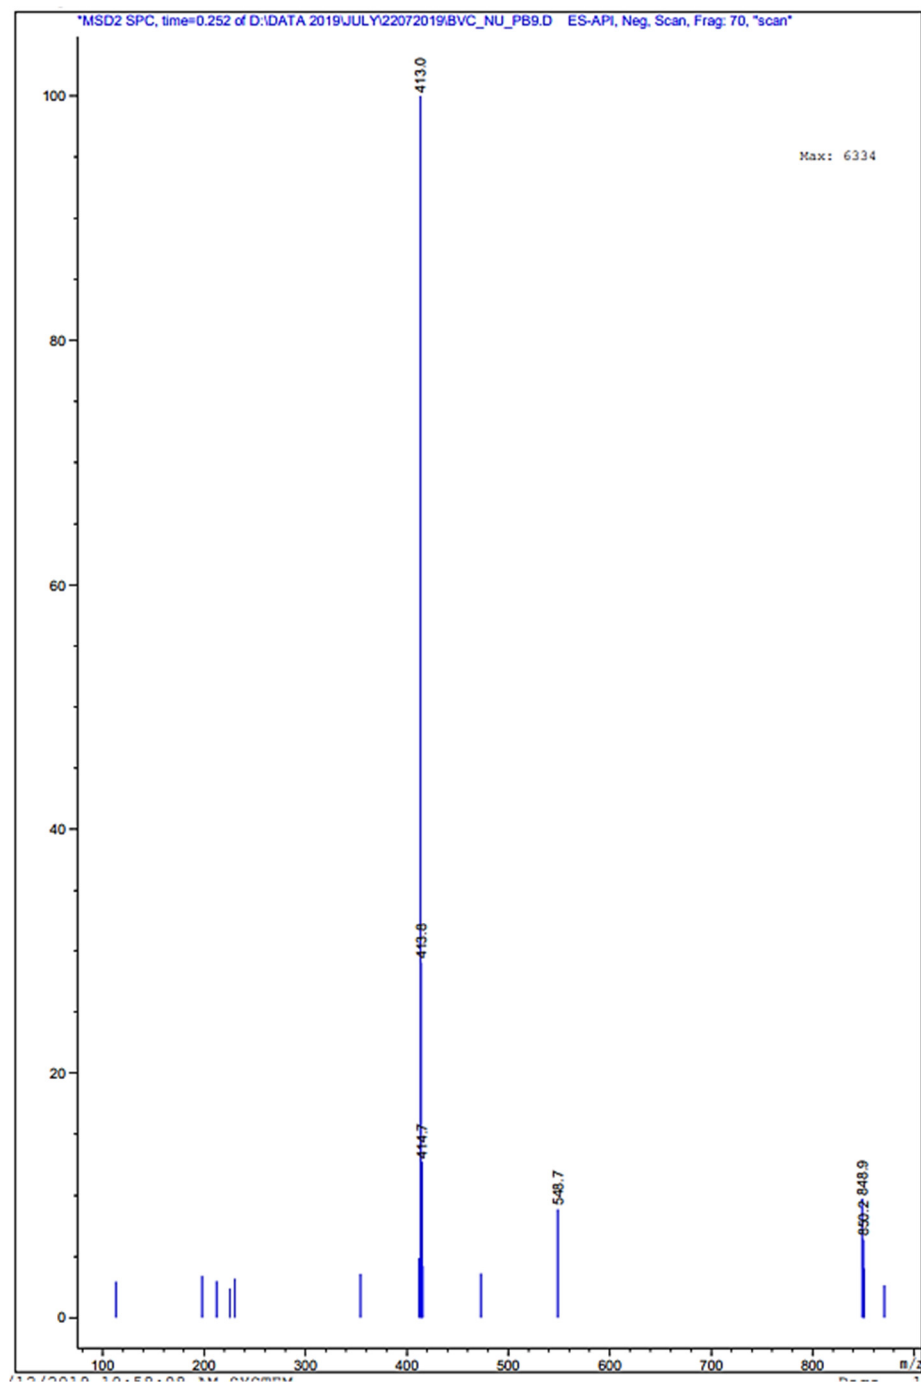

## 2-(5-benzylidene-2,4-dioxo thiazolidine-3-yl)-N-(4-chloro benzo[d]thiazol-2-yl)acetamide (GB1)

### 1. FTIR

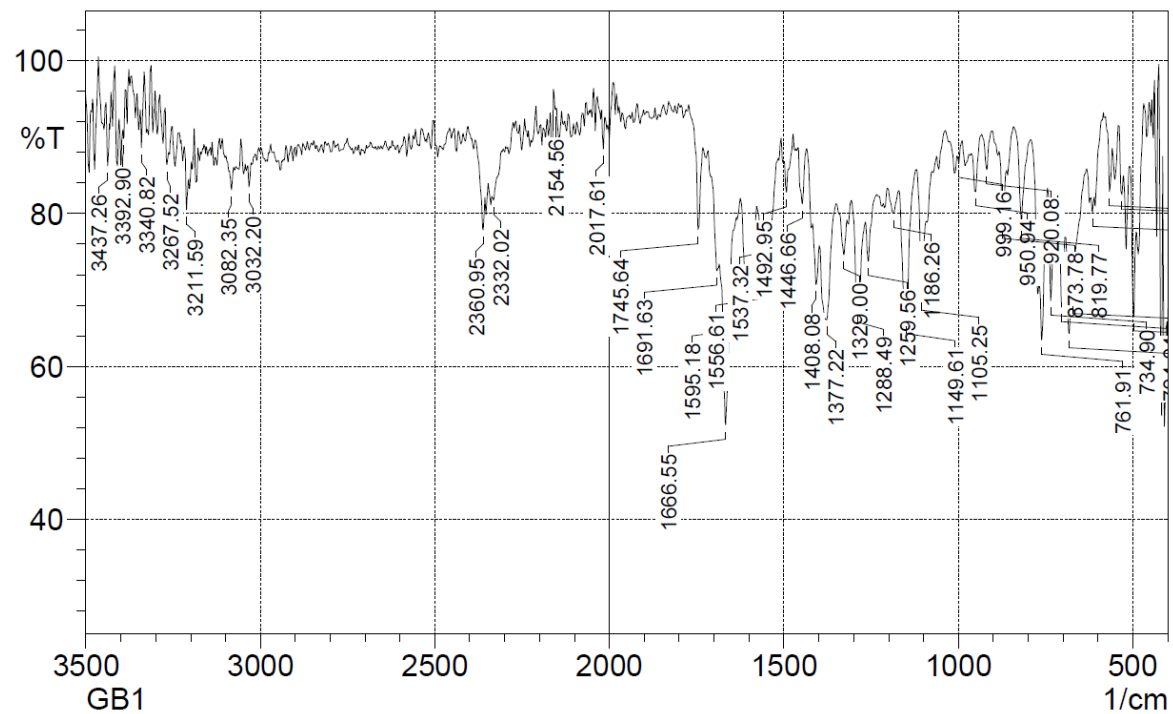

### 2. $^1\text{H-NMR}$



SAIFNM190114A-45(GS-1)

SAIF Cochin

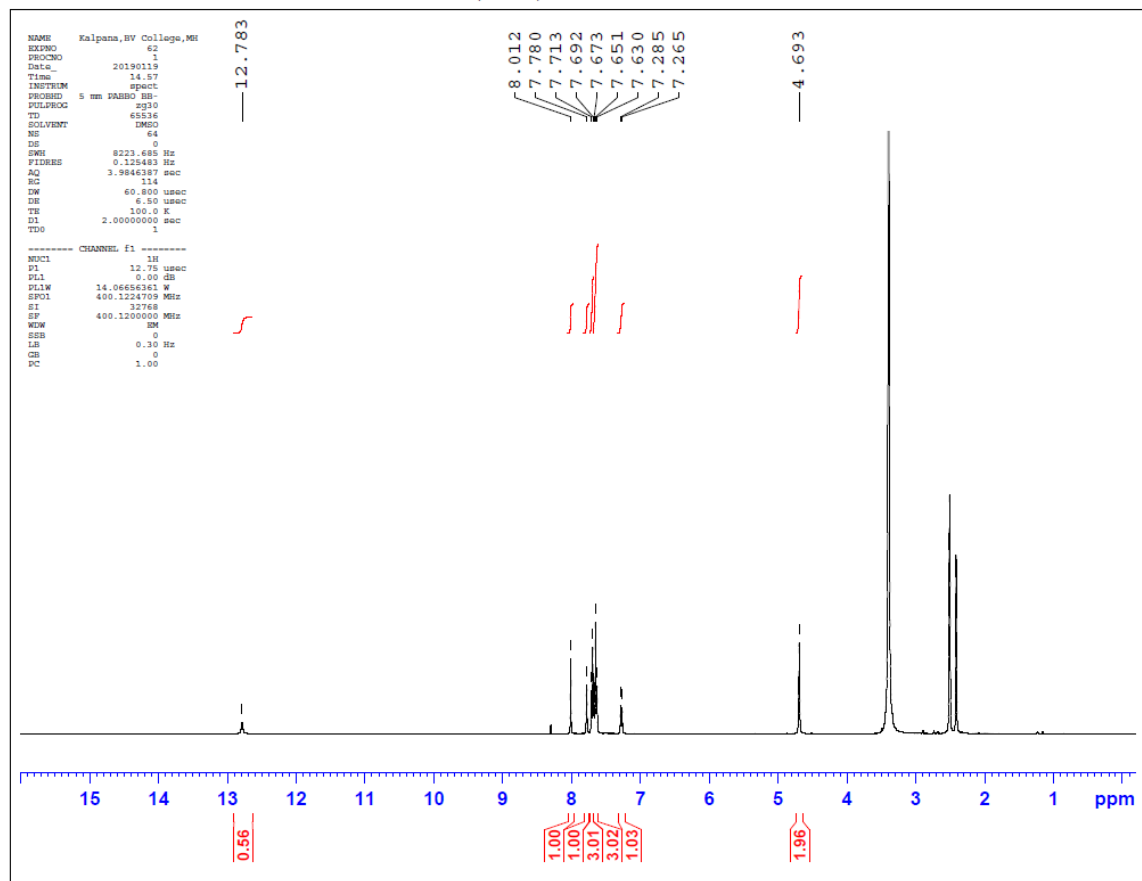

### 3. 13C-NMR

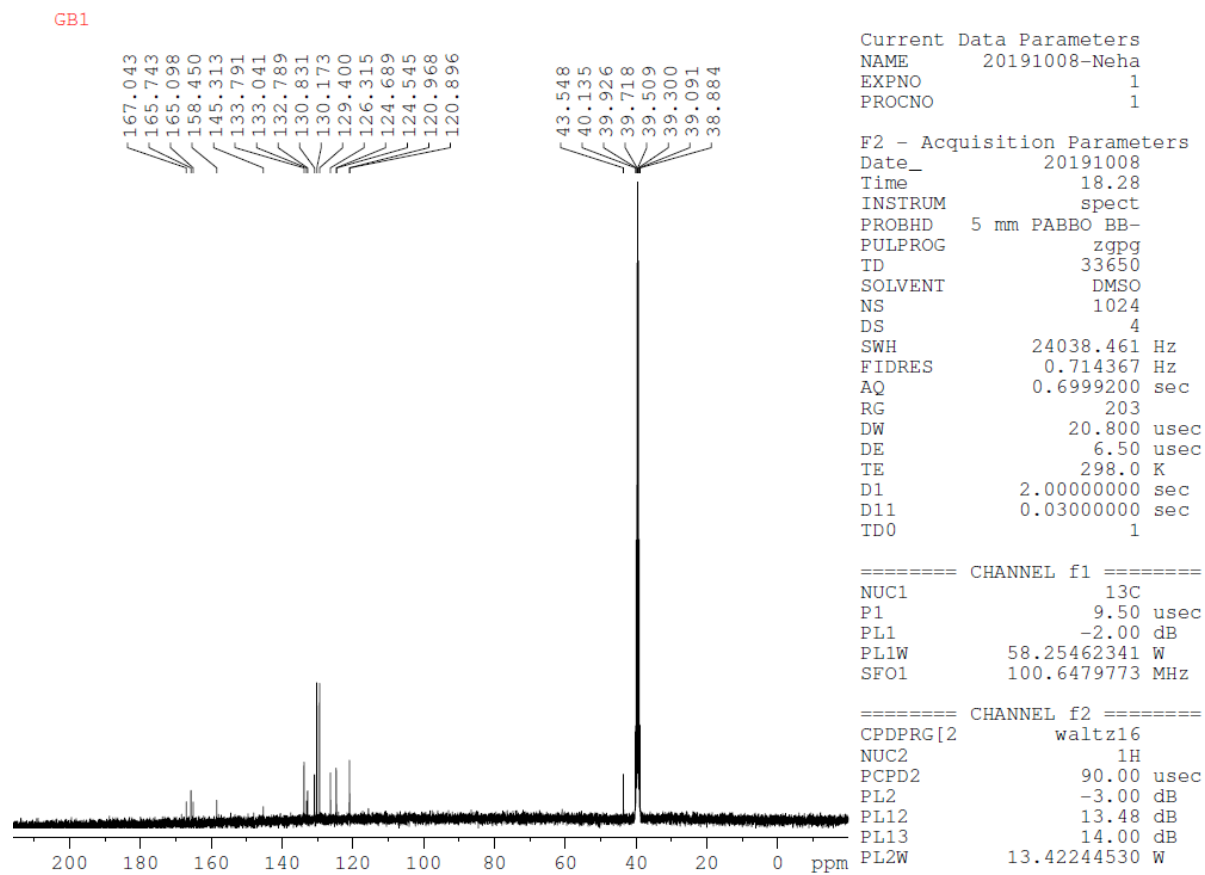

#### 4. HPLC

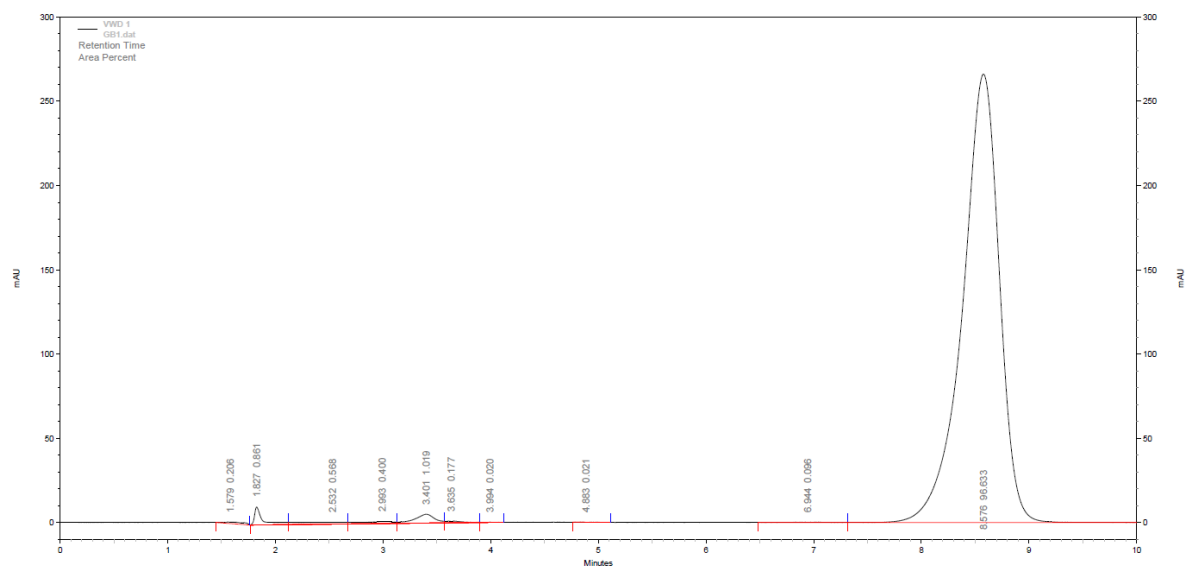

## 5. Mass

MS Spectrum

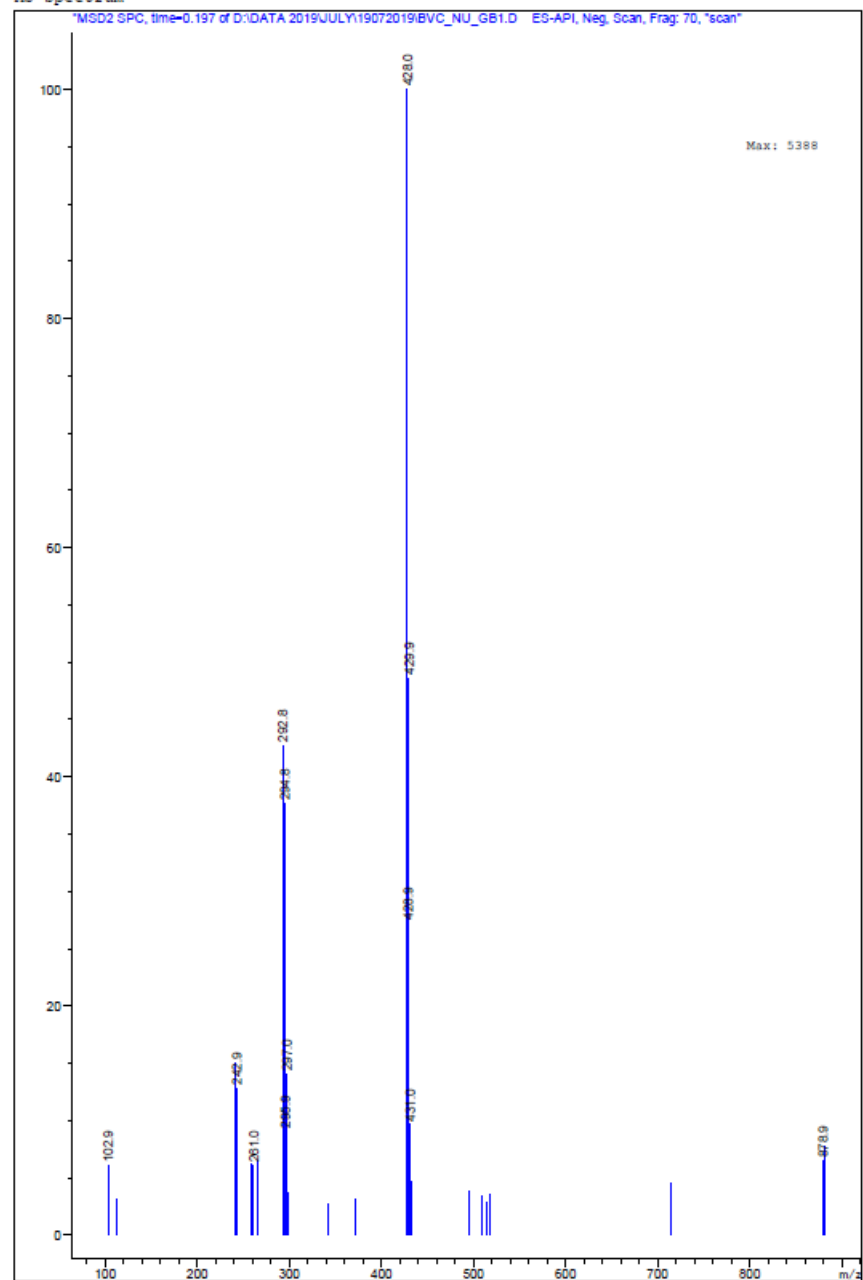

**N-(4-chlorobenzo[d]thiazol-2-yl)-2-(5-(4-methylbenzylidene)-2,4-dioxothiazolidin-3-yl)acetamide (GB2)**

**1. FTIR**

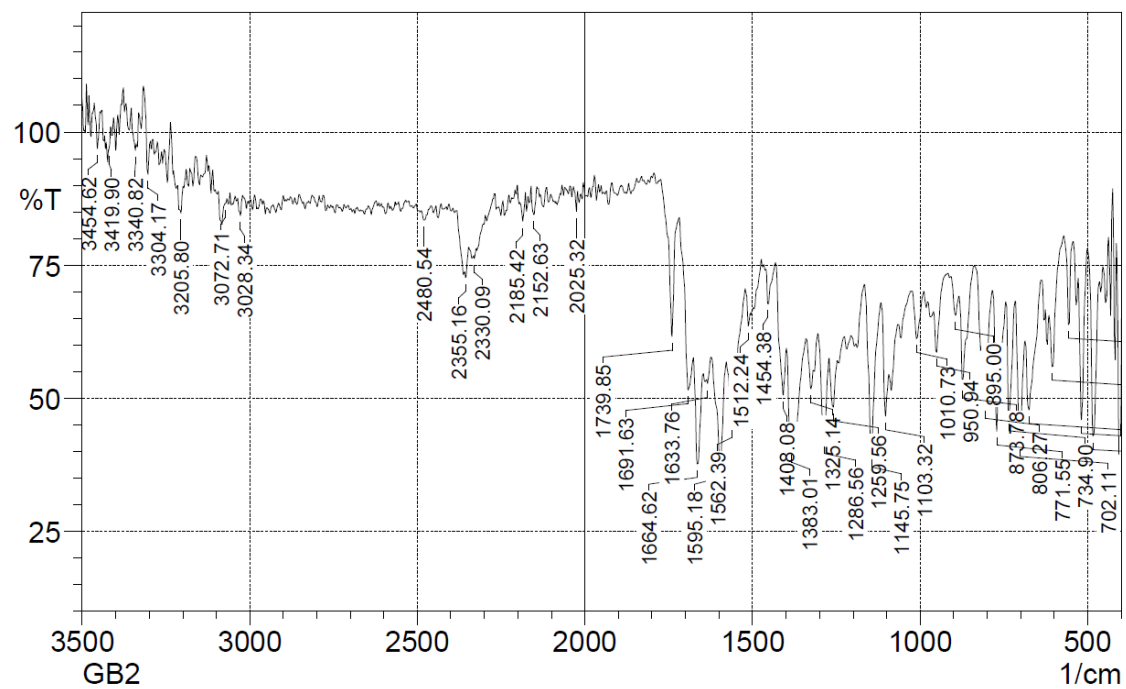

**2. <sup>1</sup>H-NMR**

SAIFNM190323A-05(GB2)

SAIF Cochin

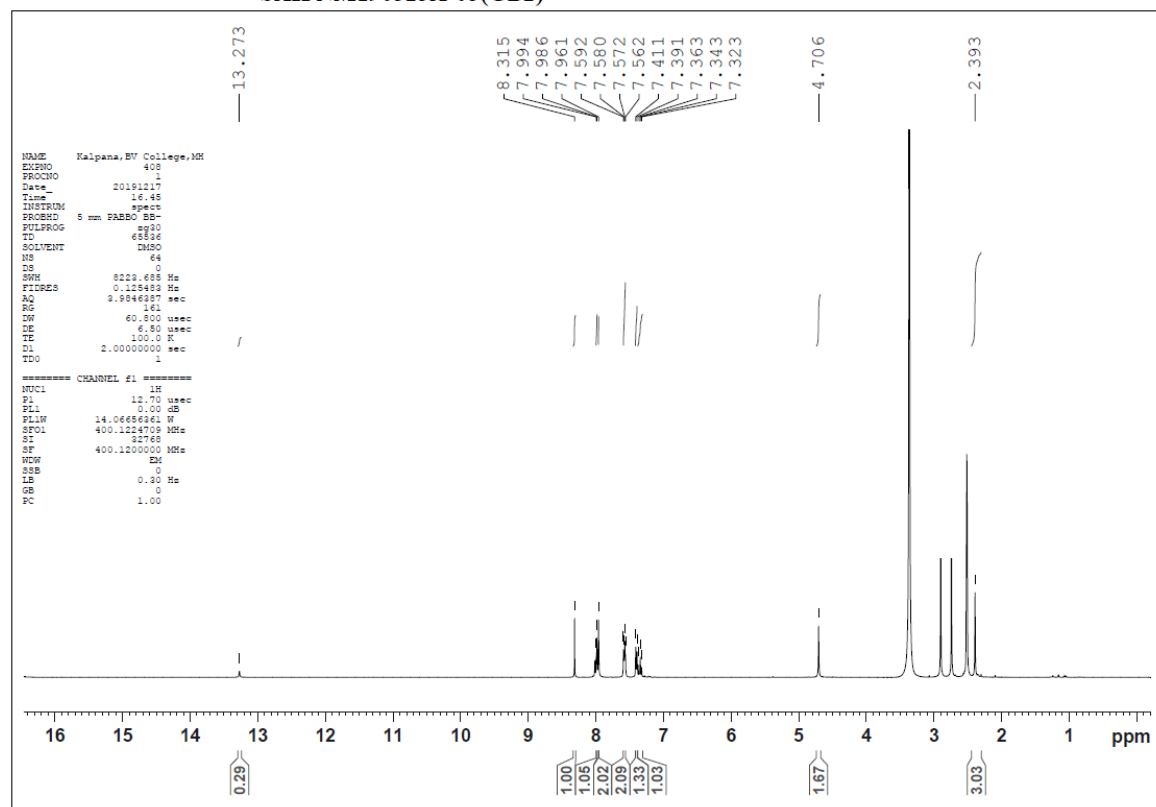

### 3. 13C-NMR

SAIFNM190323A-06(GB2)

SAIF Cochin

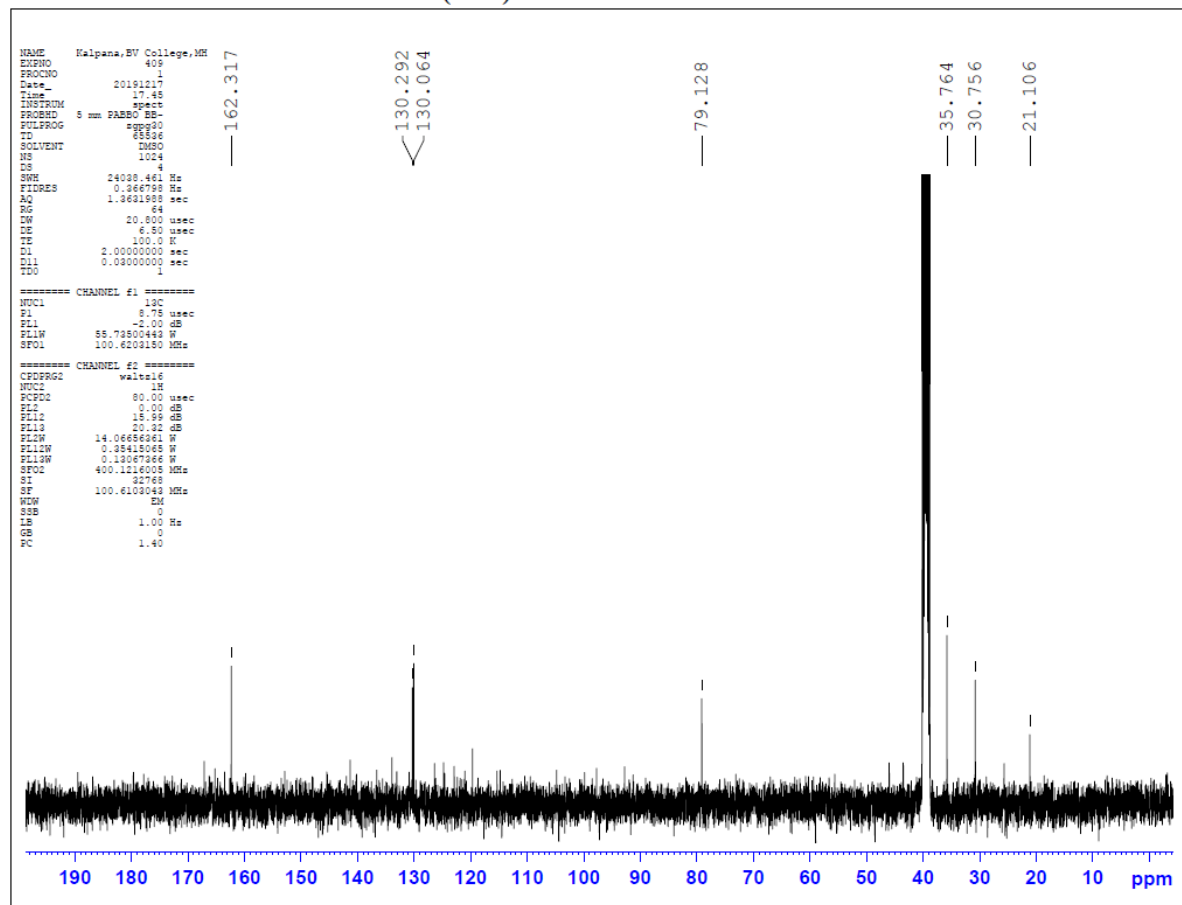

#### 4. HPLC

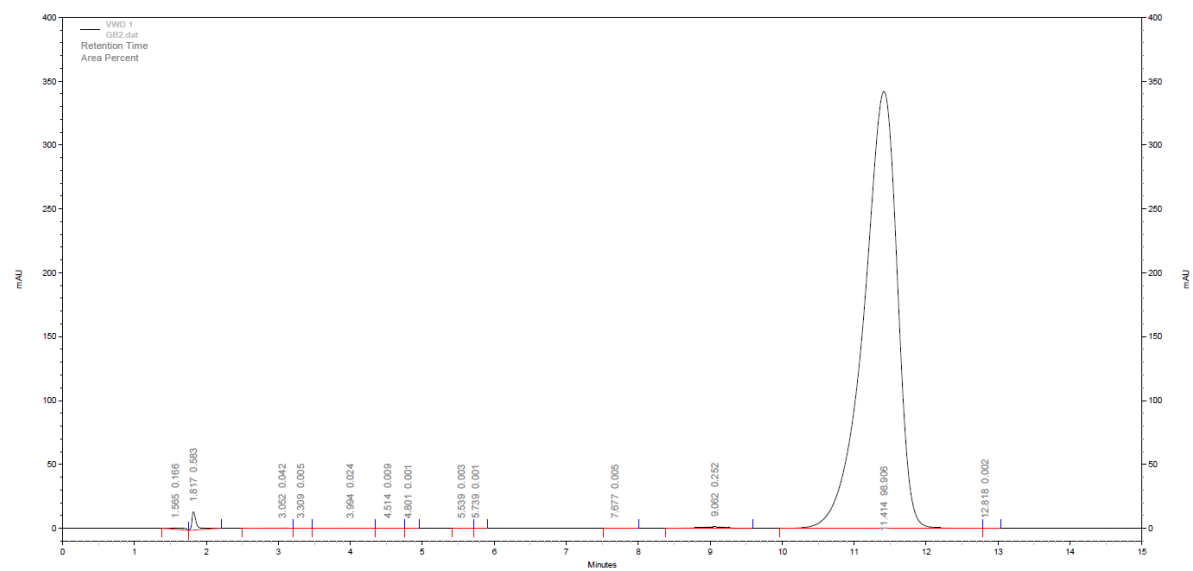

## 5. Mass



MS Spectrum

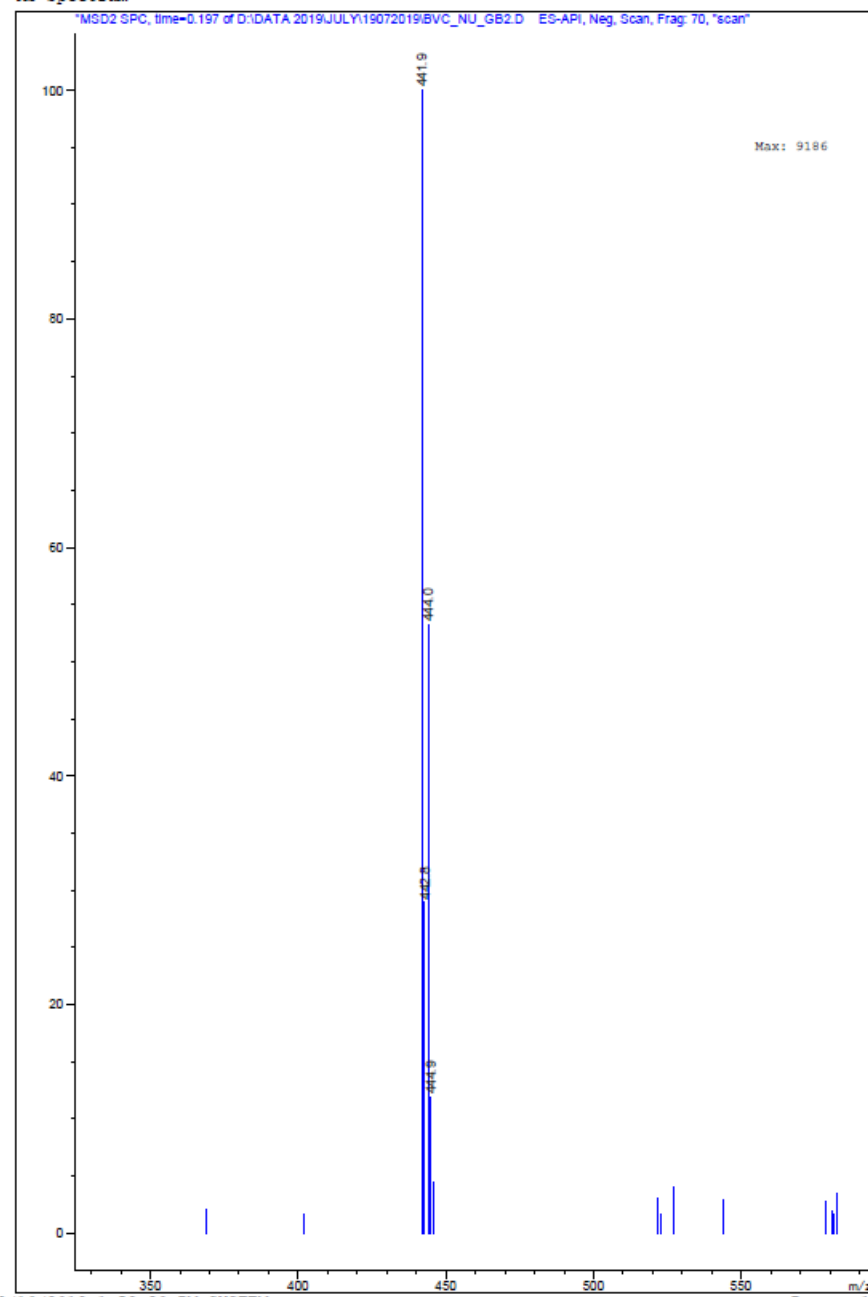

**N-(4-chlorobenzo[d]thiazol-2-yl)-2-(5-(4-chlorobenzylidene)-2,4-dioxothiazolidin-3-yl)acetamide (GB3)**

**1. FTIR -**

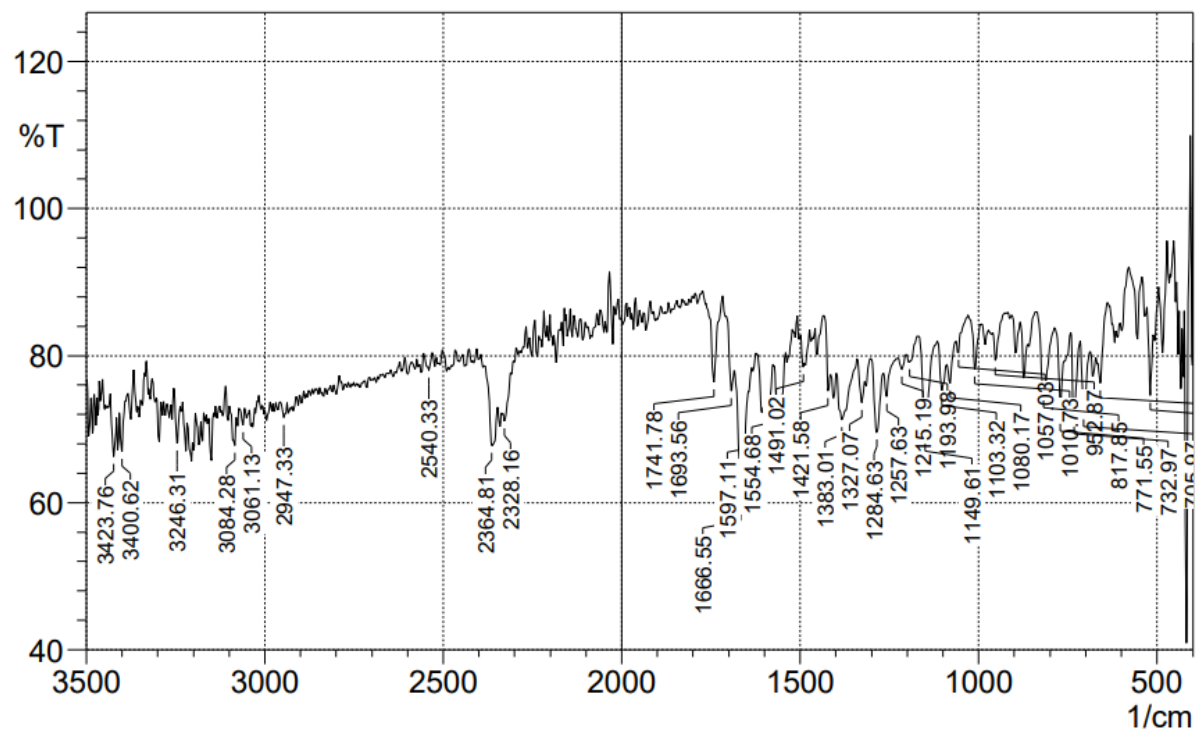

**2. <sup>1</sup>H-NMR**

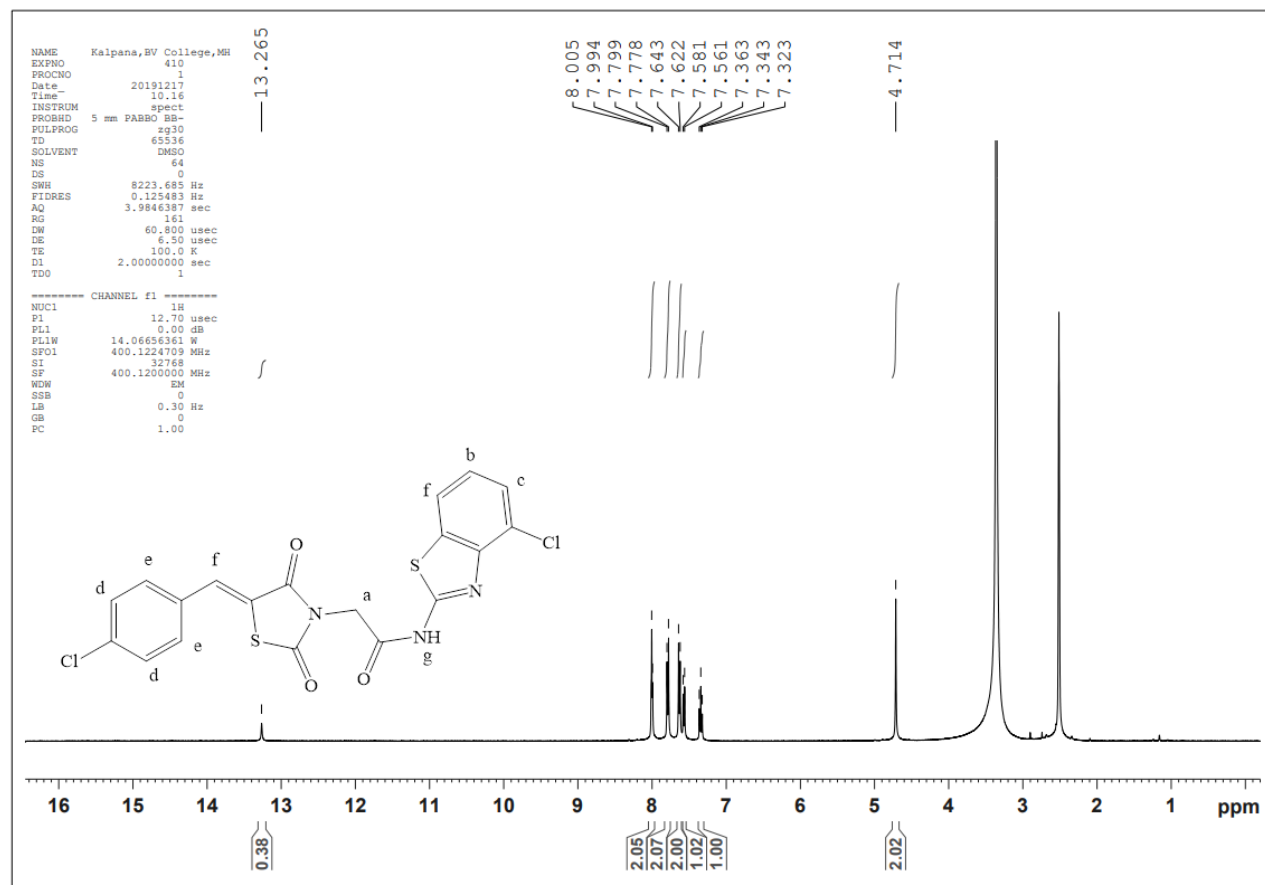

### 3. <sup>13</sup>C-NMR

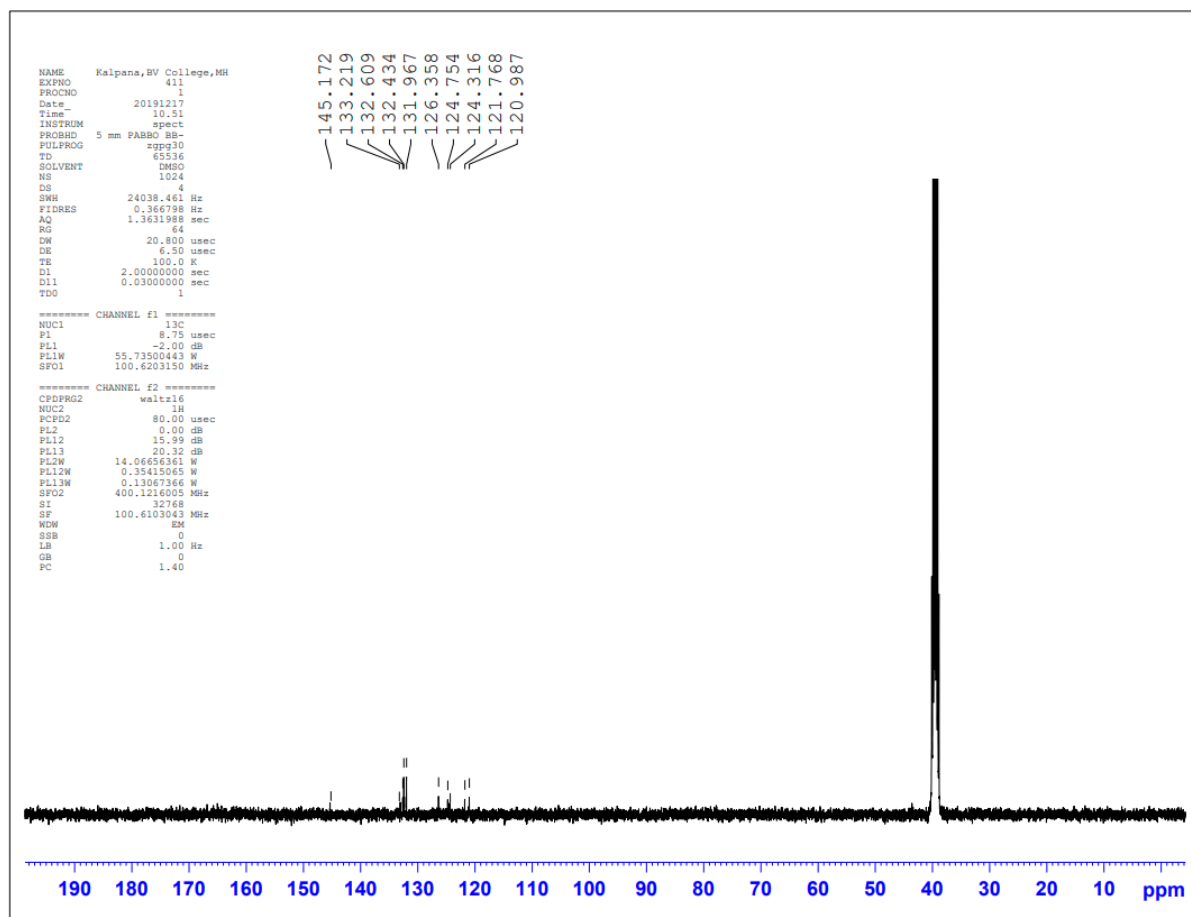

#### 4. HPLC Analysis

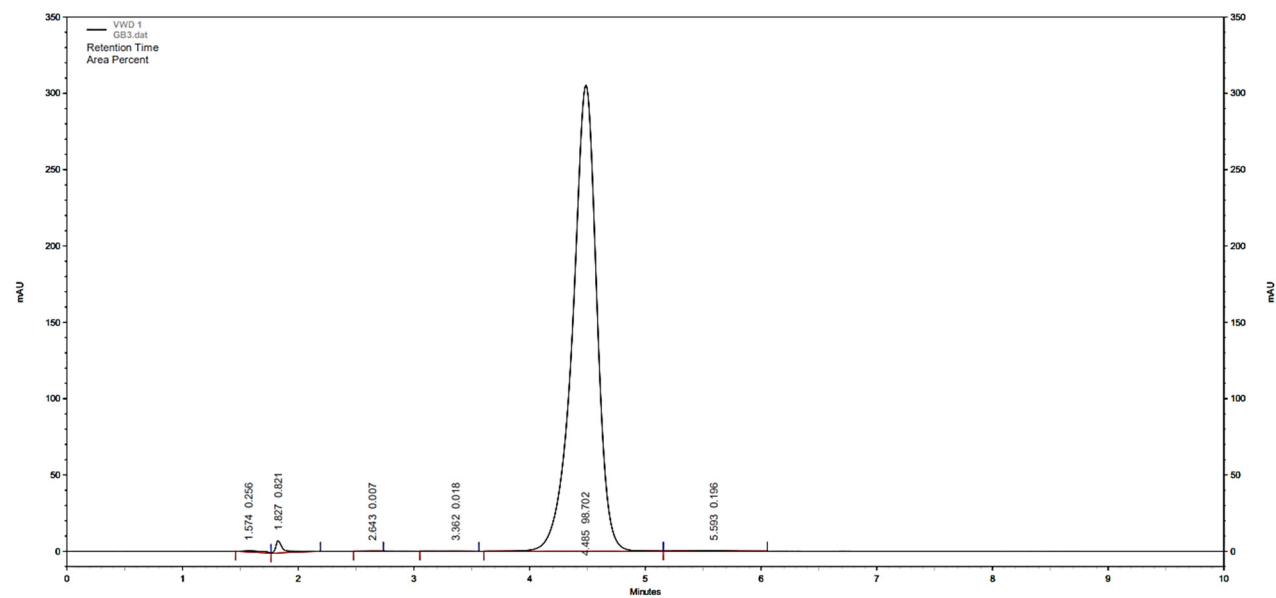

## 5. Mass Spectrometry

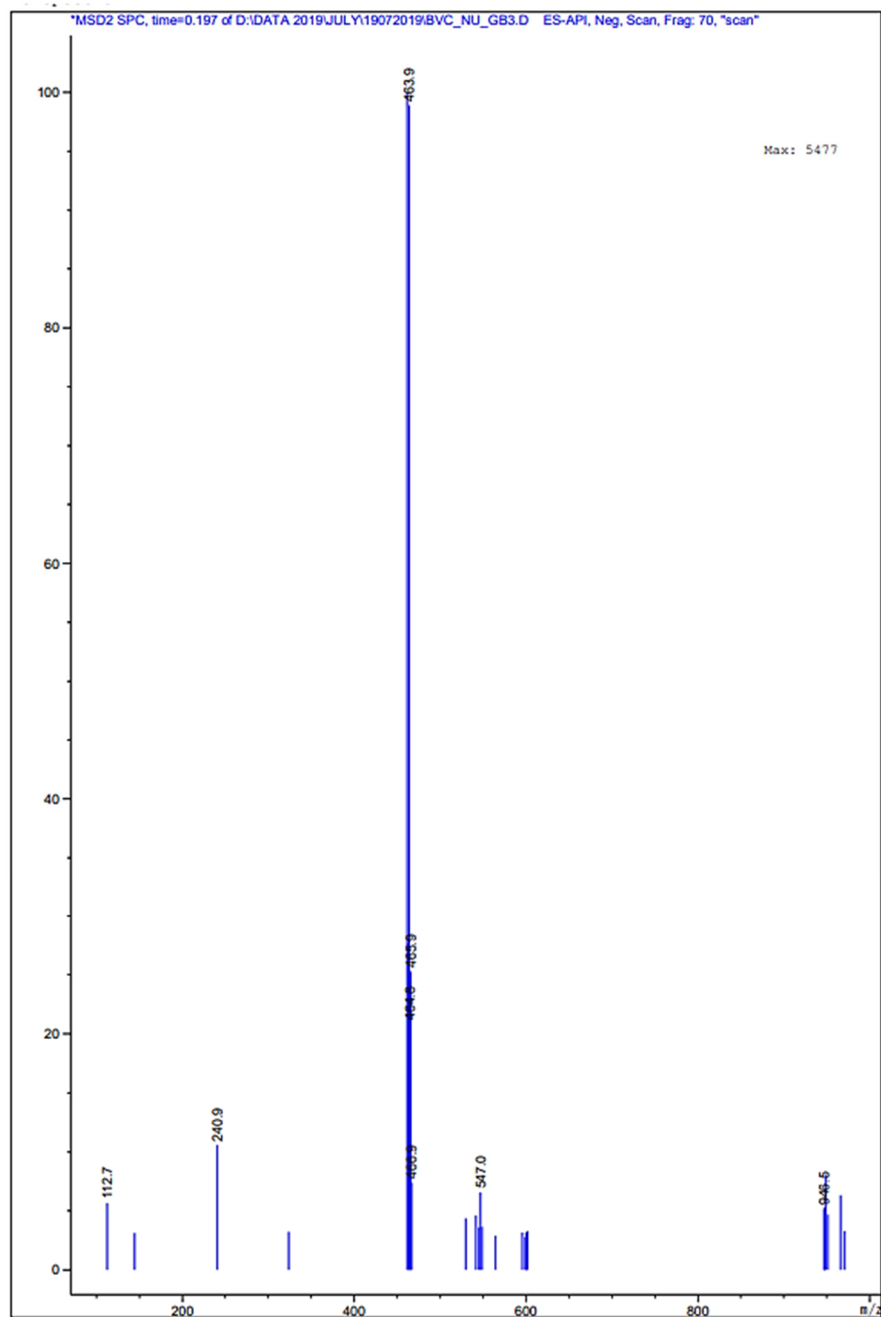

## 6. UV

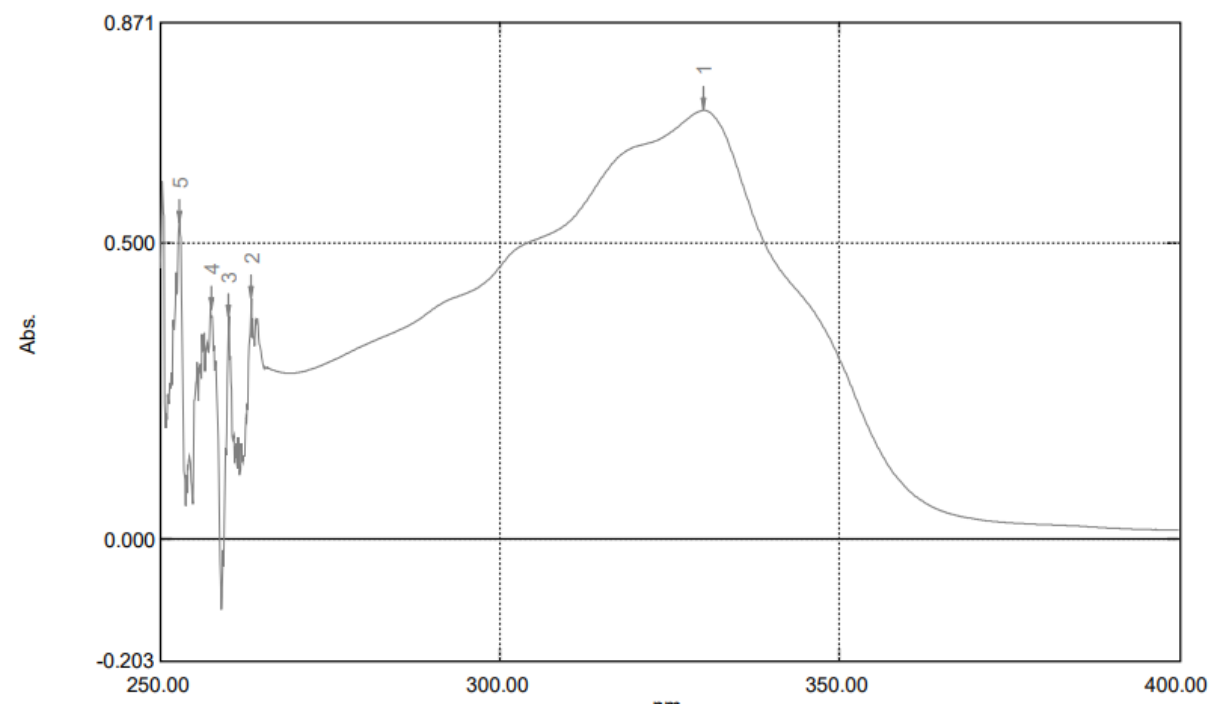

**2-(5-(4-bromobenzylidene)-2,4-dioxothiazolidin-3-yl)-N-(4-chlorobenzo[d]thiazol-2-yl)acetamide (GB4)**

**1. FTIR**

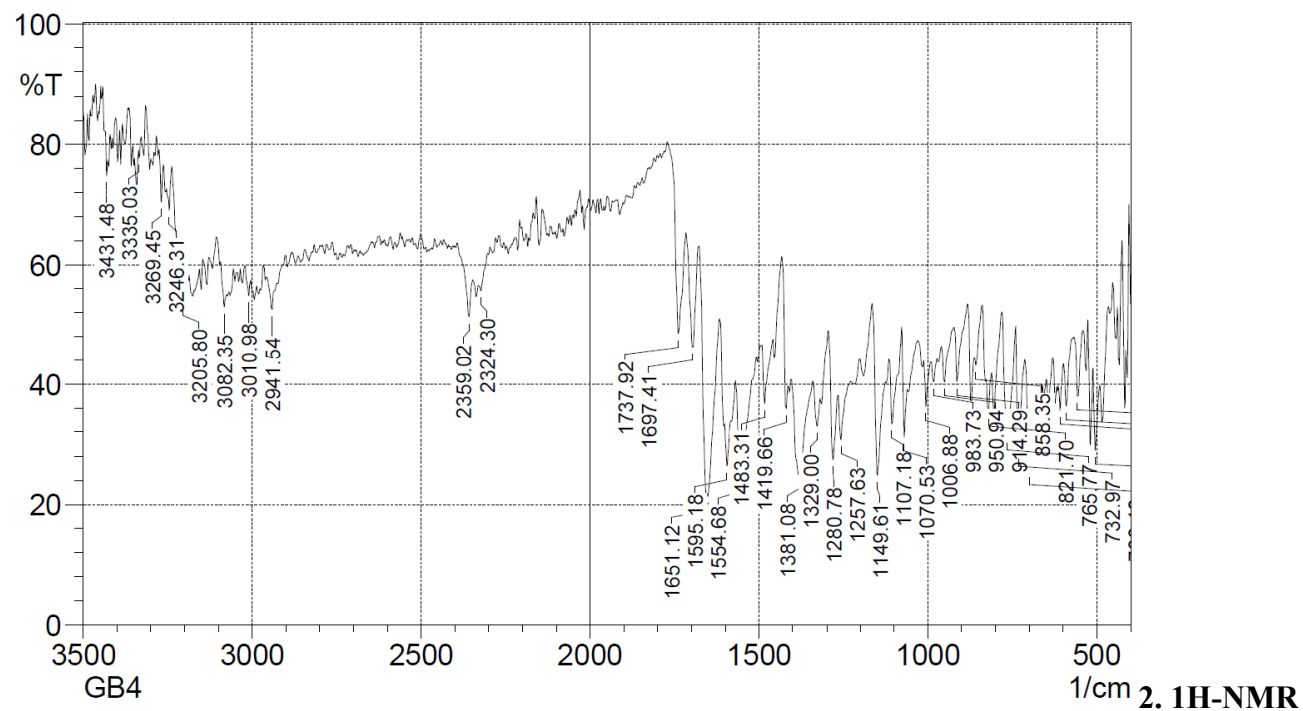

**2. <sup>1</sup>H-NMR**



SAIFNM190323A-07(GB4)

SAIF Cochin

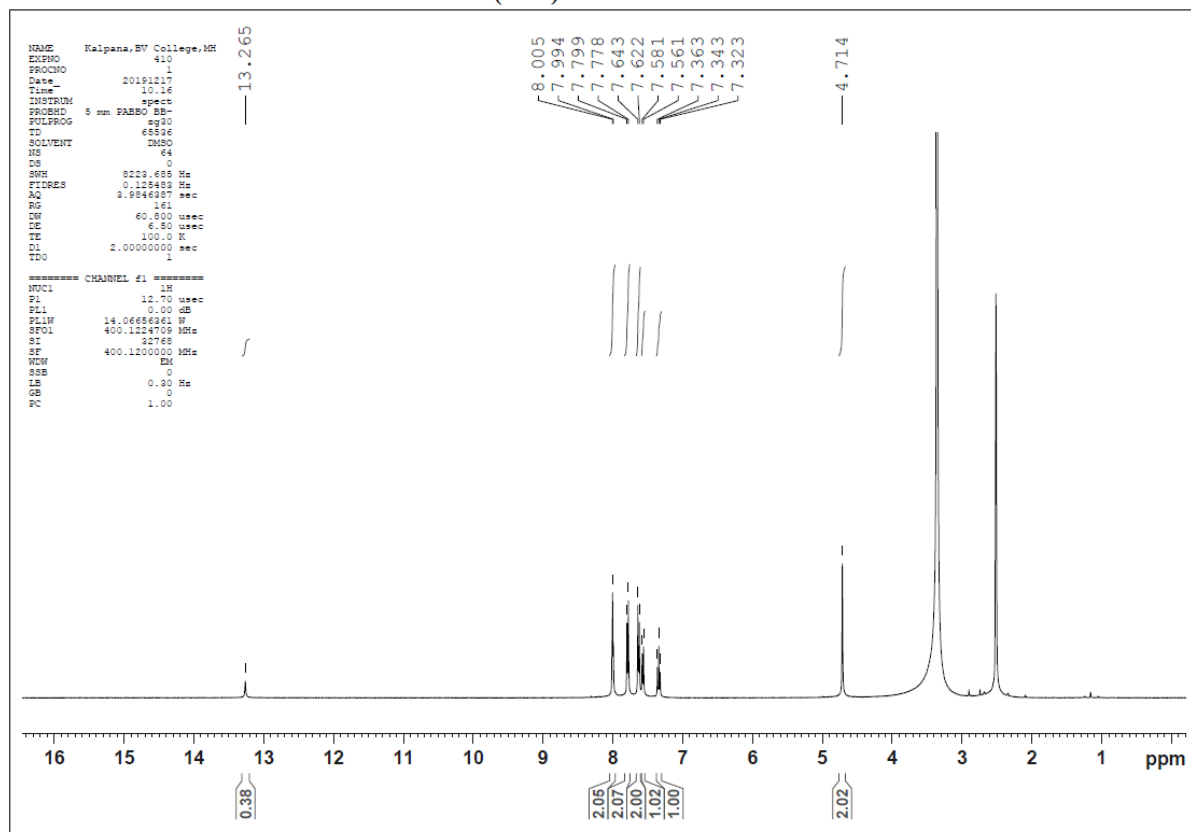

### 3. 13C-NMR

SAIFNM190323A-08(GB4)

SAIF Cochin

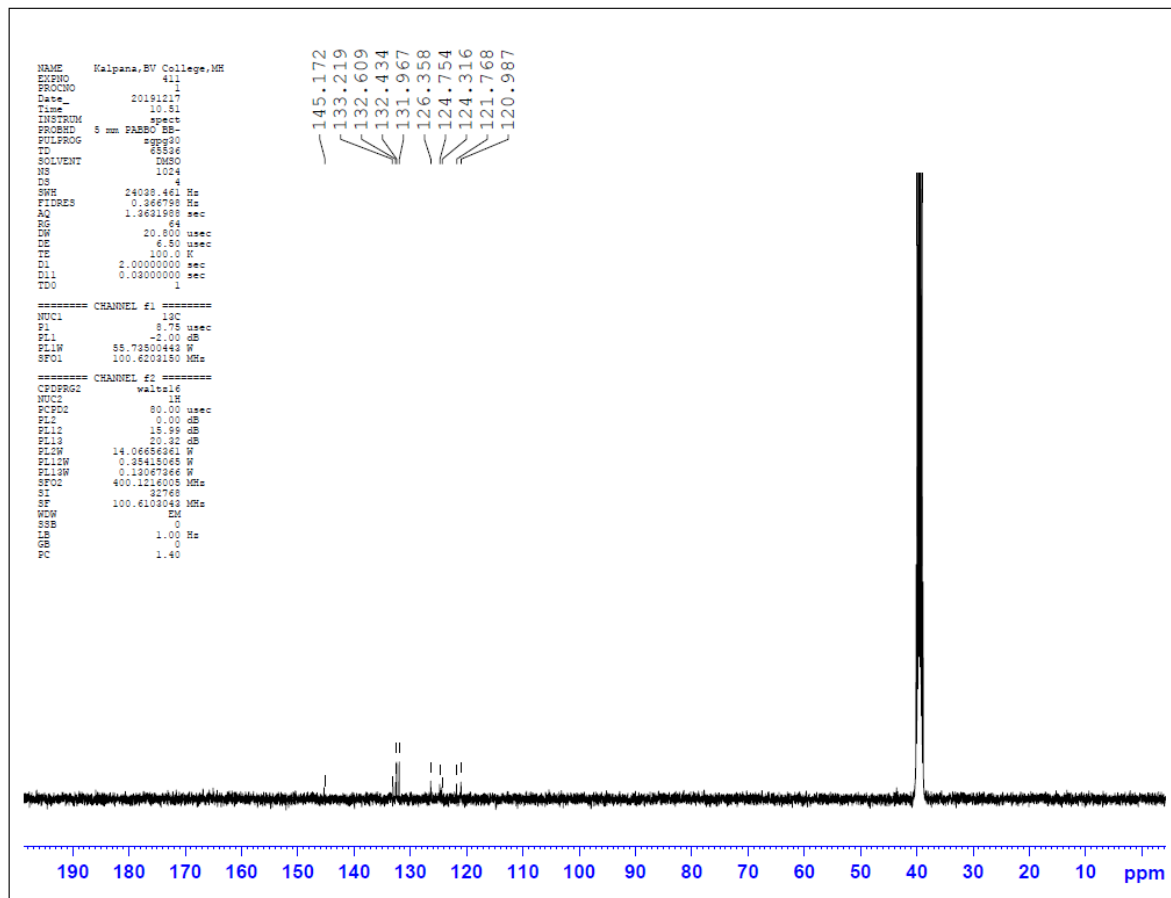

## 5. HPLC

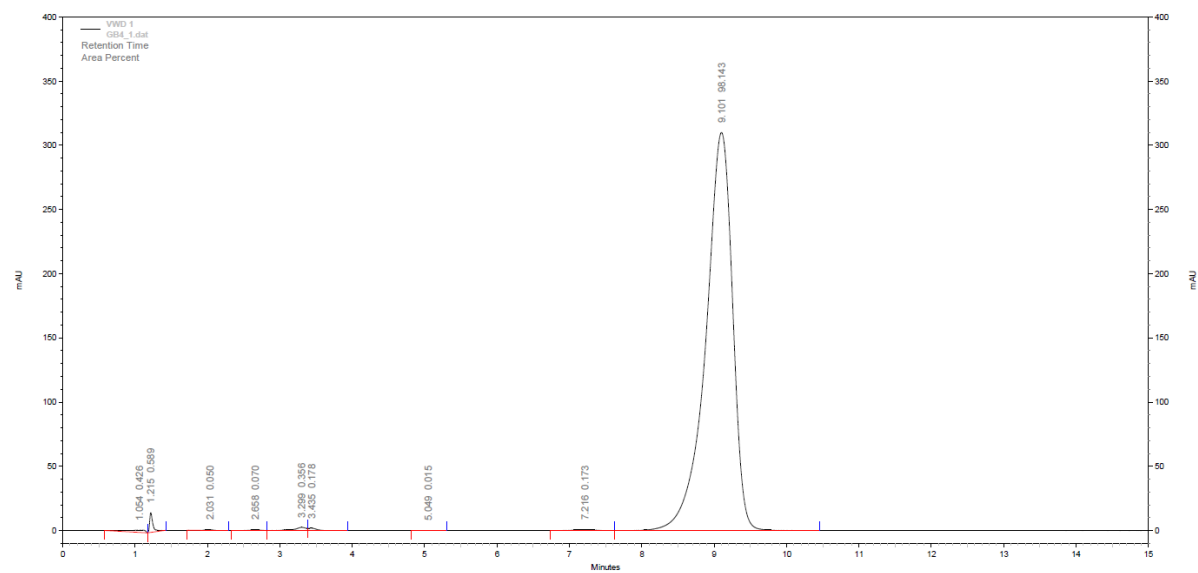

## 5. Mass

MS Spectrum

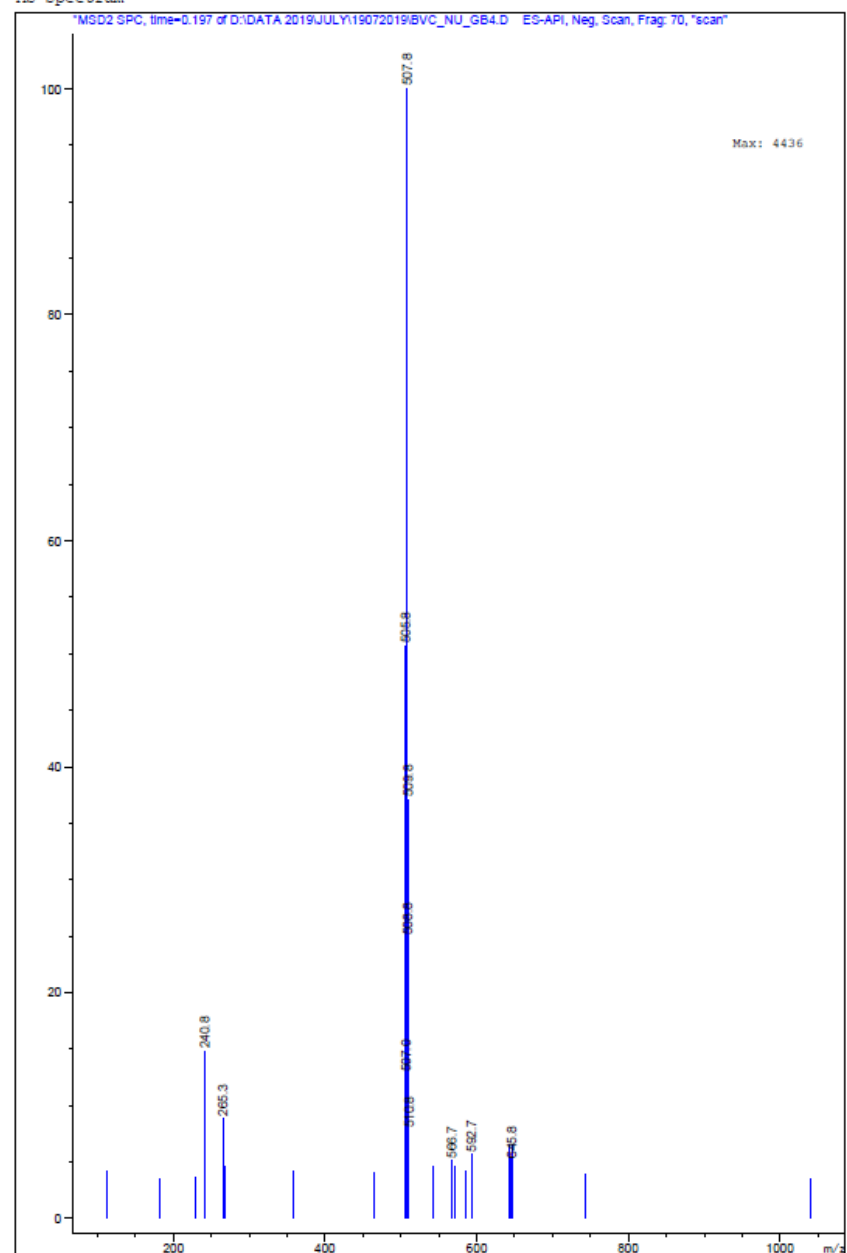

**N-(4-chlorobenzo[d]thiazol-2-yl)-2-(5-(2,4-difluorobenzylidene)-2,4-dioxothiazolidin-3-yl)acetamide (GB5)**

**1. FTIR -**

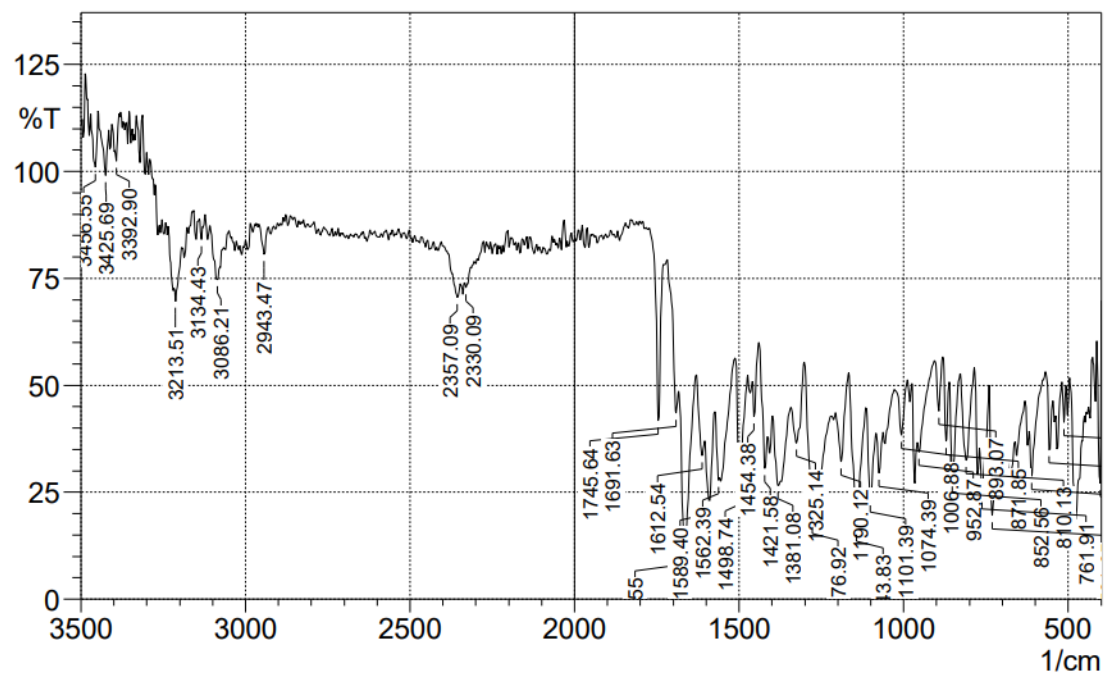

**2. <sup>1</sup>H-NMR**

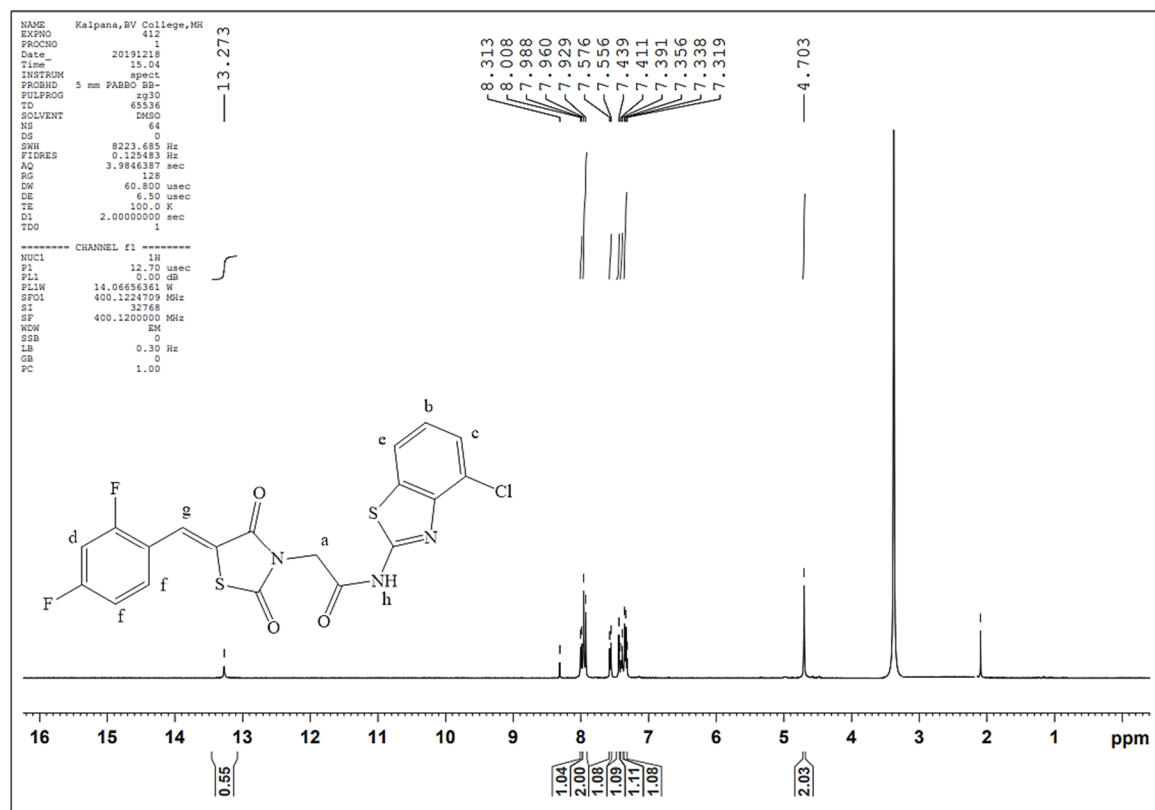

### 3. <sup>13</sup>C-NMR

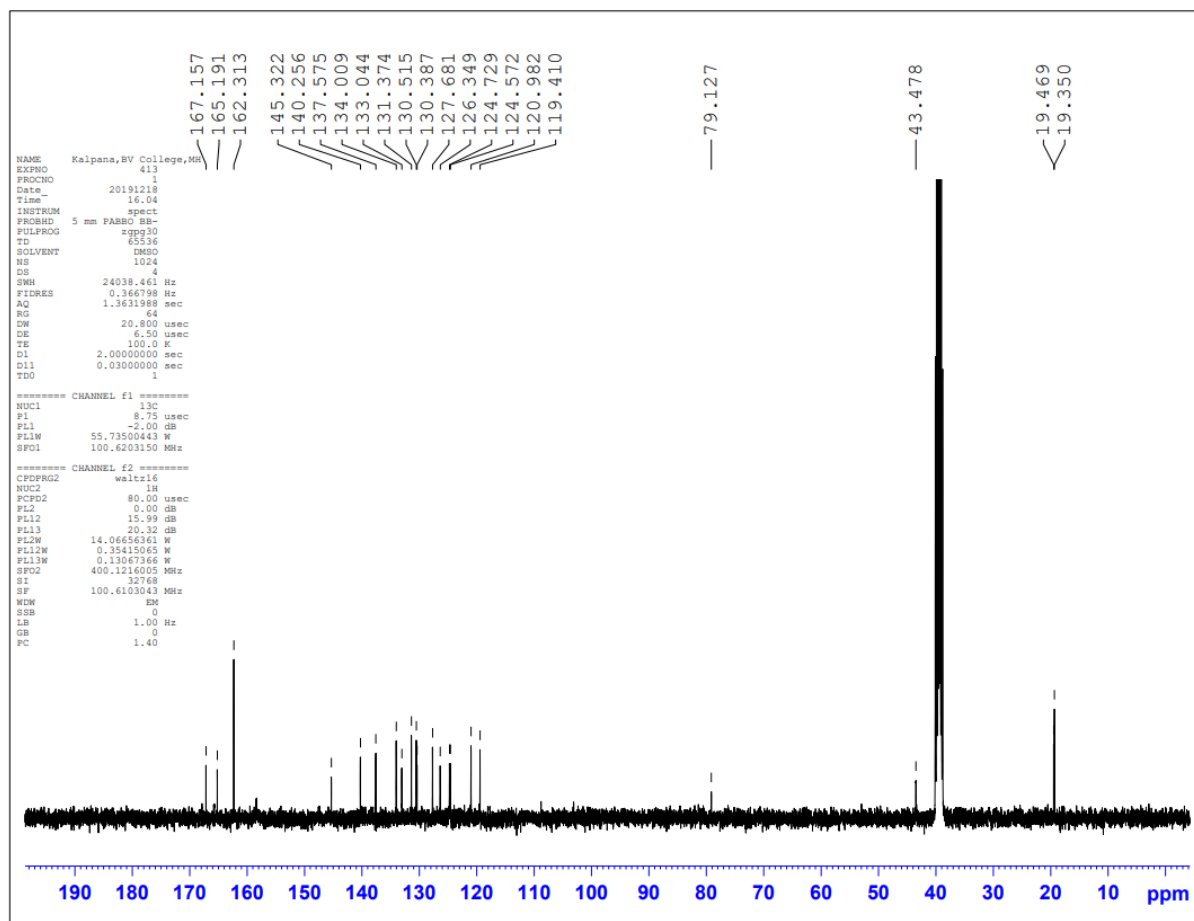

#### 4. HPLC

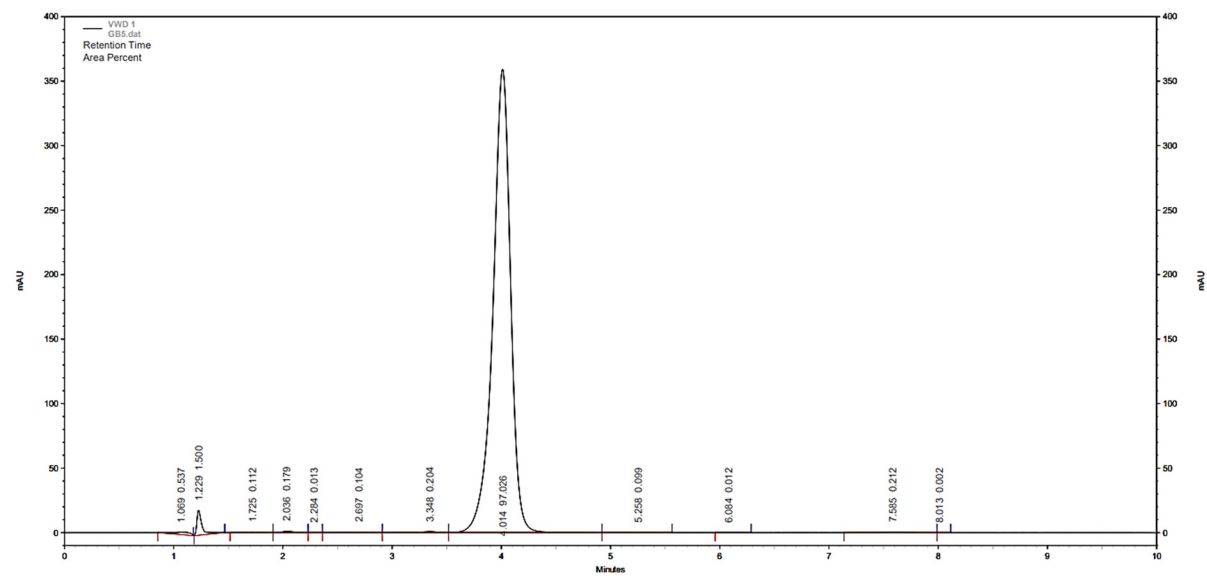

## 5. Mass Spectrometry



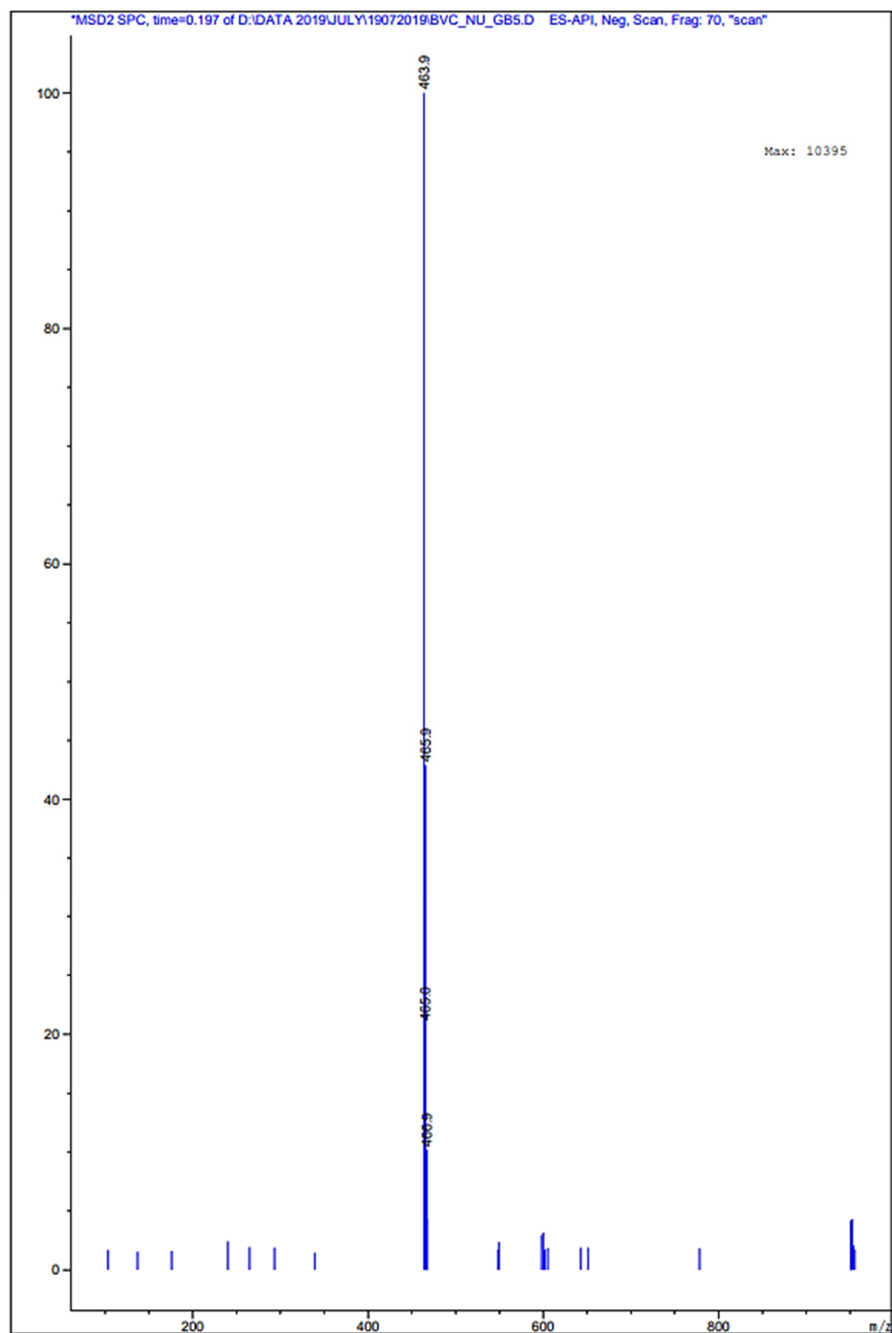

## 6. UV

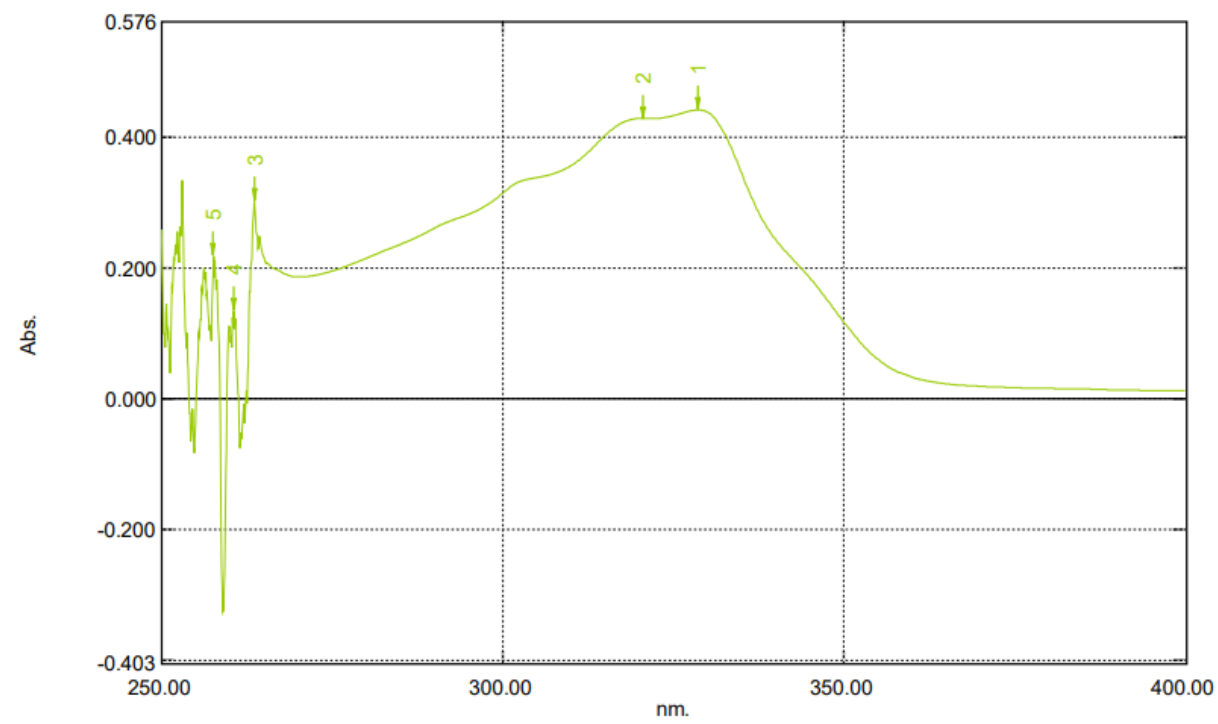

**N-(4-chlorobenzo[d]thiazol-2-yl)-2-(5-(3,4-dimethylbenzylidene)-2,4-dioxothiazolidin-3-yl)acetamide (GB6)**

**1. FTIR**

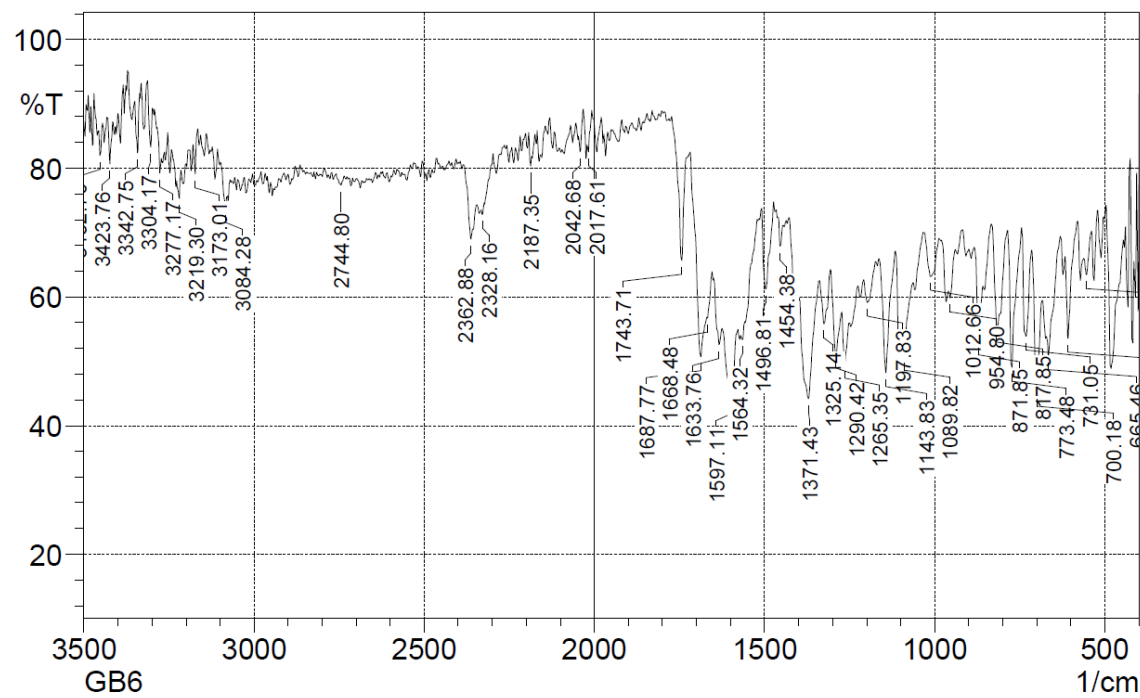

**2. 1H-NMR**

SAIFNM190323A-09(GB6)

SAIF Cochin

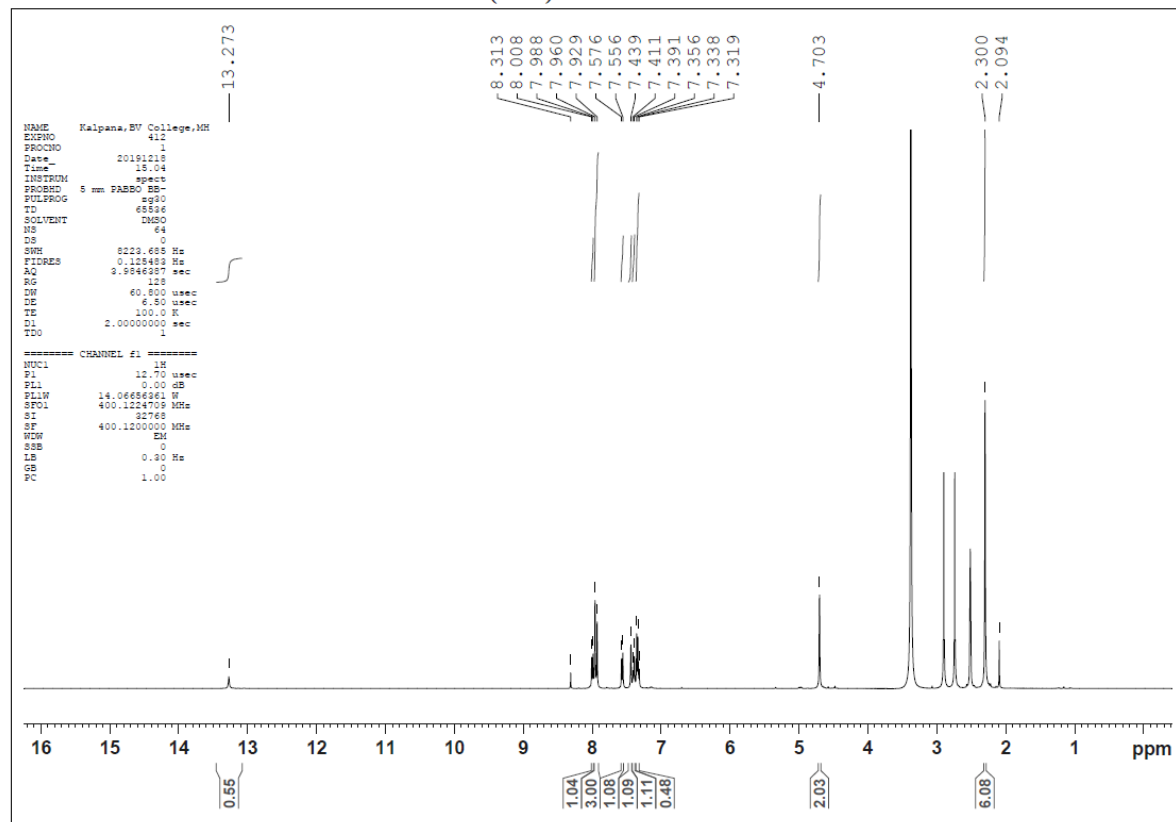

### 3. 13C-NMR

SAIFNM190323A-10(GB6)

SAIF Cochlin

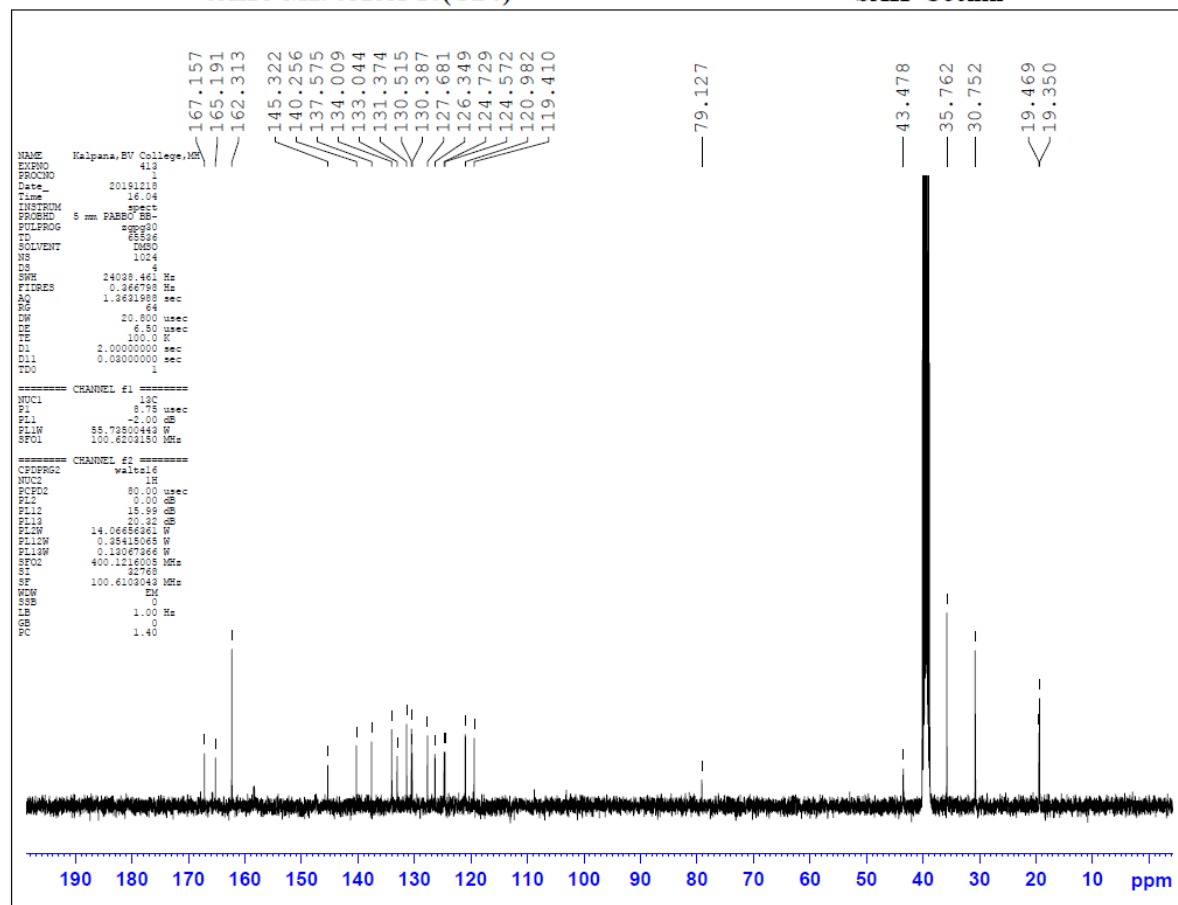

#### 4. HPLC

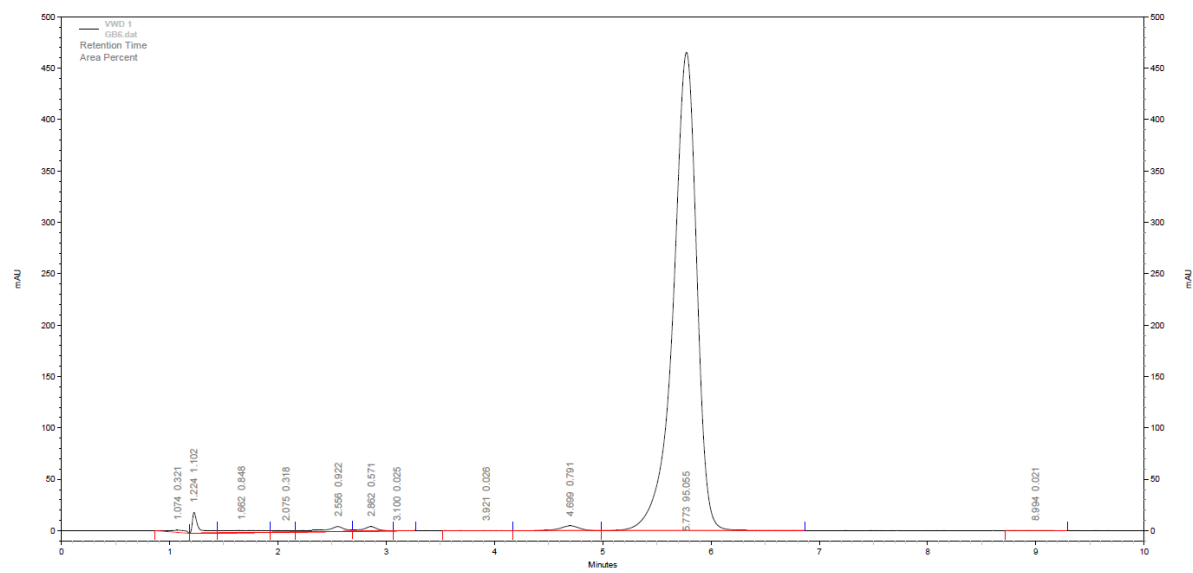

## 5. Mass

MS Spectrum

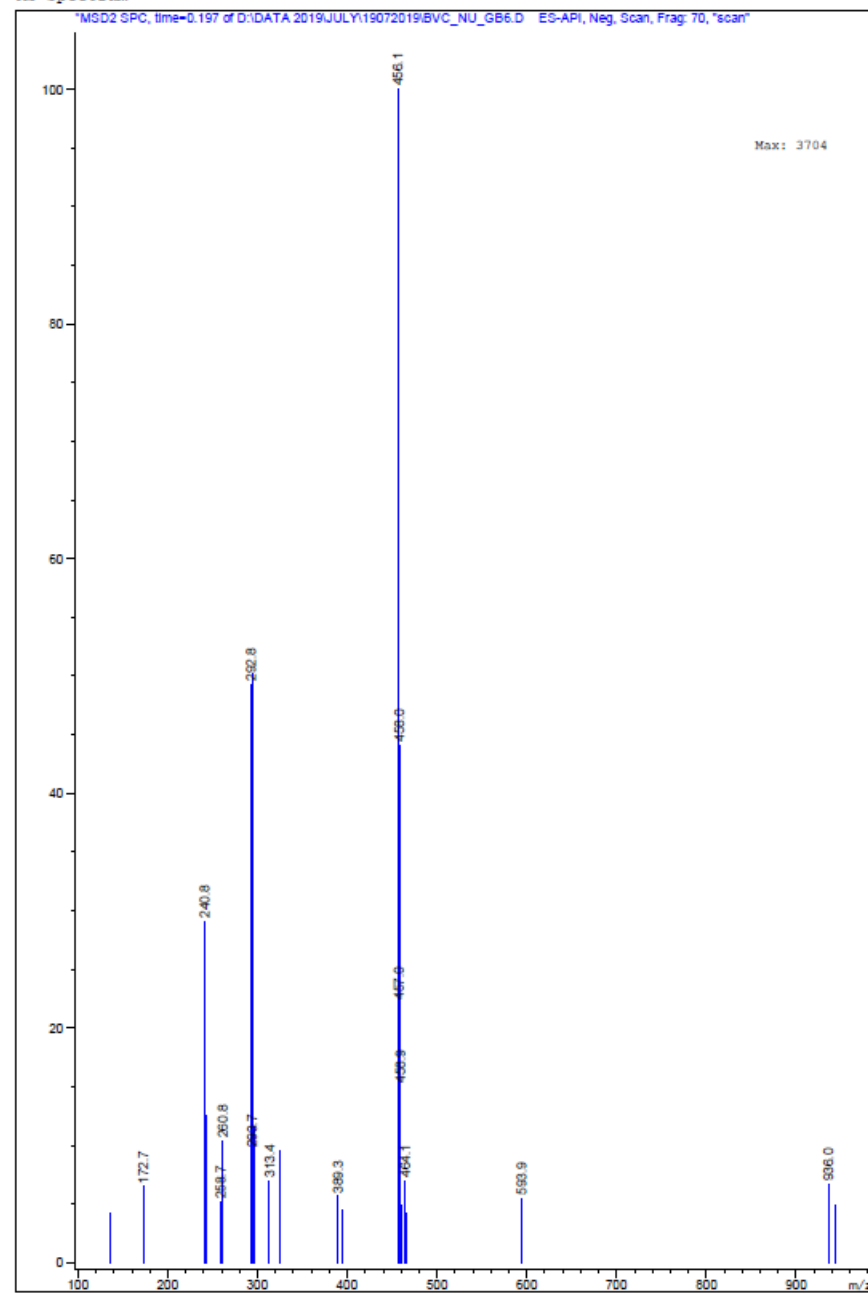

## 2-(5-(4-bromobenzylidene)-2,4-dioxothiazolidin-3-yl)-N-(4,6-difluorobenzo[d]thiazol-2-yl)acetamide (GB7)

### 1. FTIR –

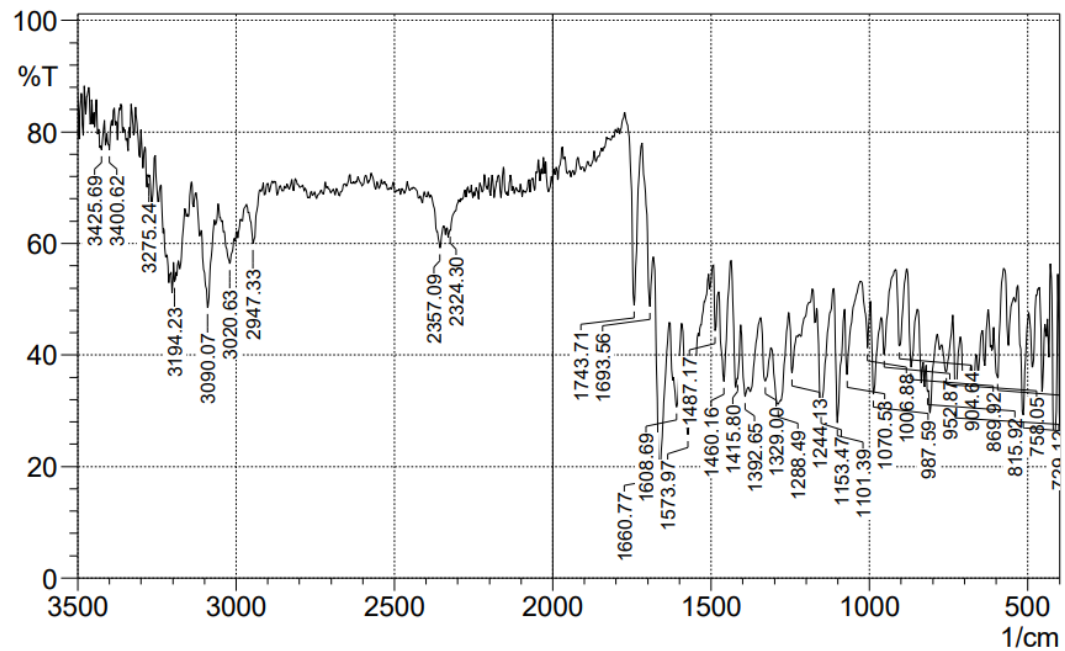

### 2. <sup>1</sup>H-NMR



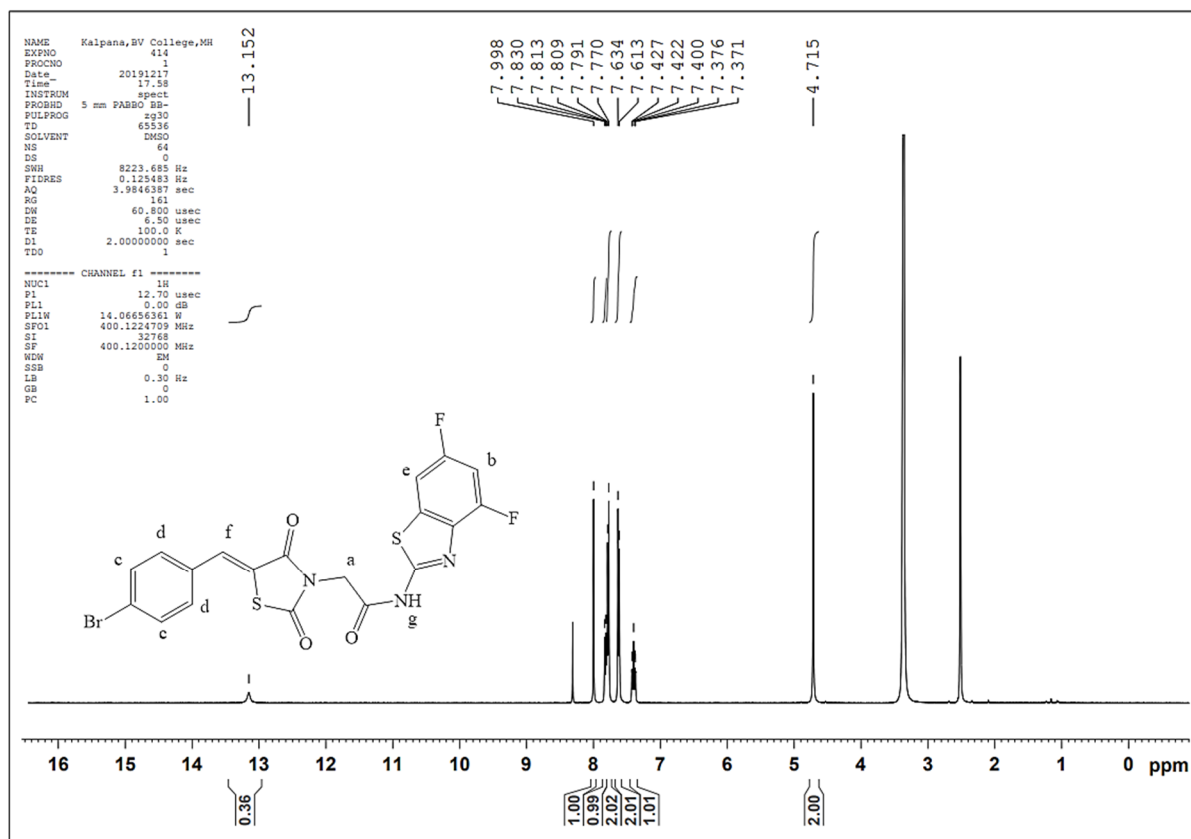

### 3. <sup>13</sup>C-NMR

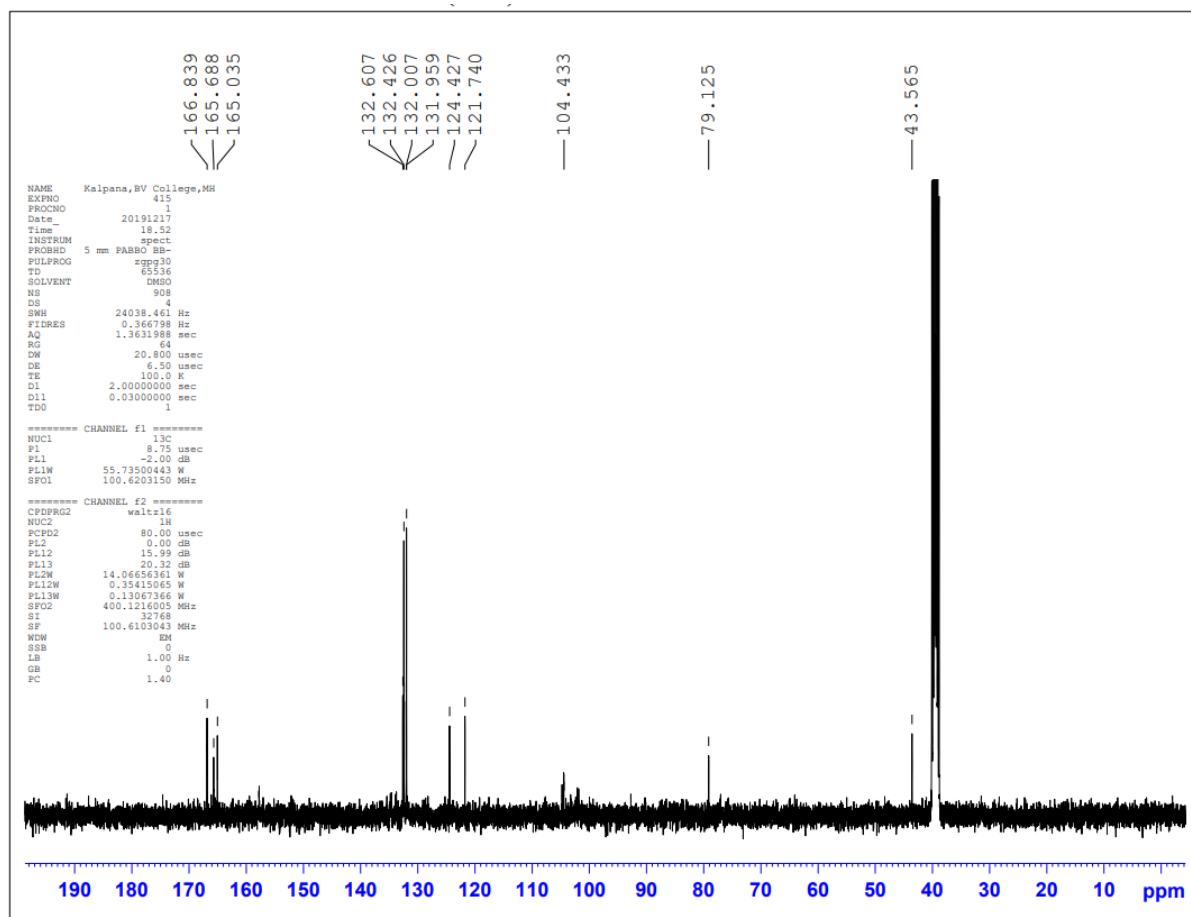

#### 4. HPLC Analysis

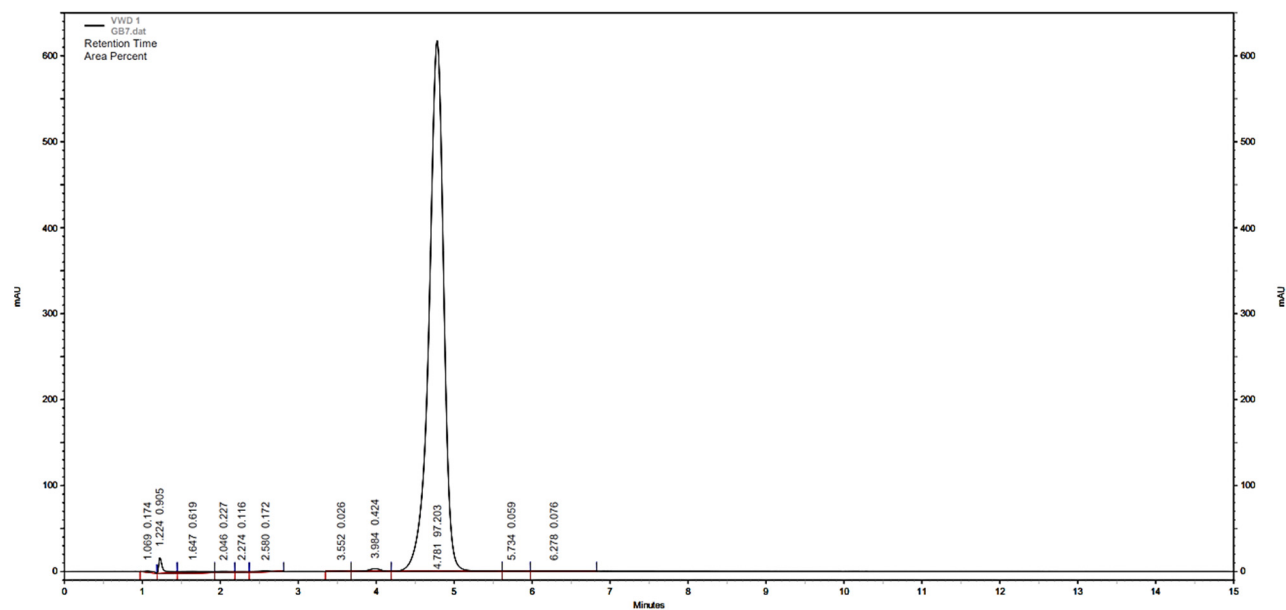

## 5. Mass Spectrometry

\*MSD2 SPC, time=0.169 of D:\DATA 2019\JULY\19072019\BVC\_NU\_GB7.D ES-API, Neg, Scan, Frag: 70, "scan"

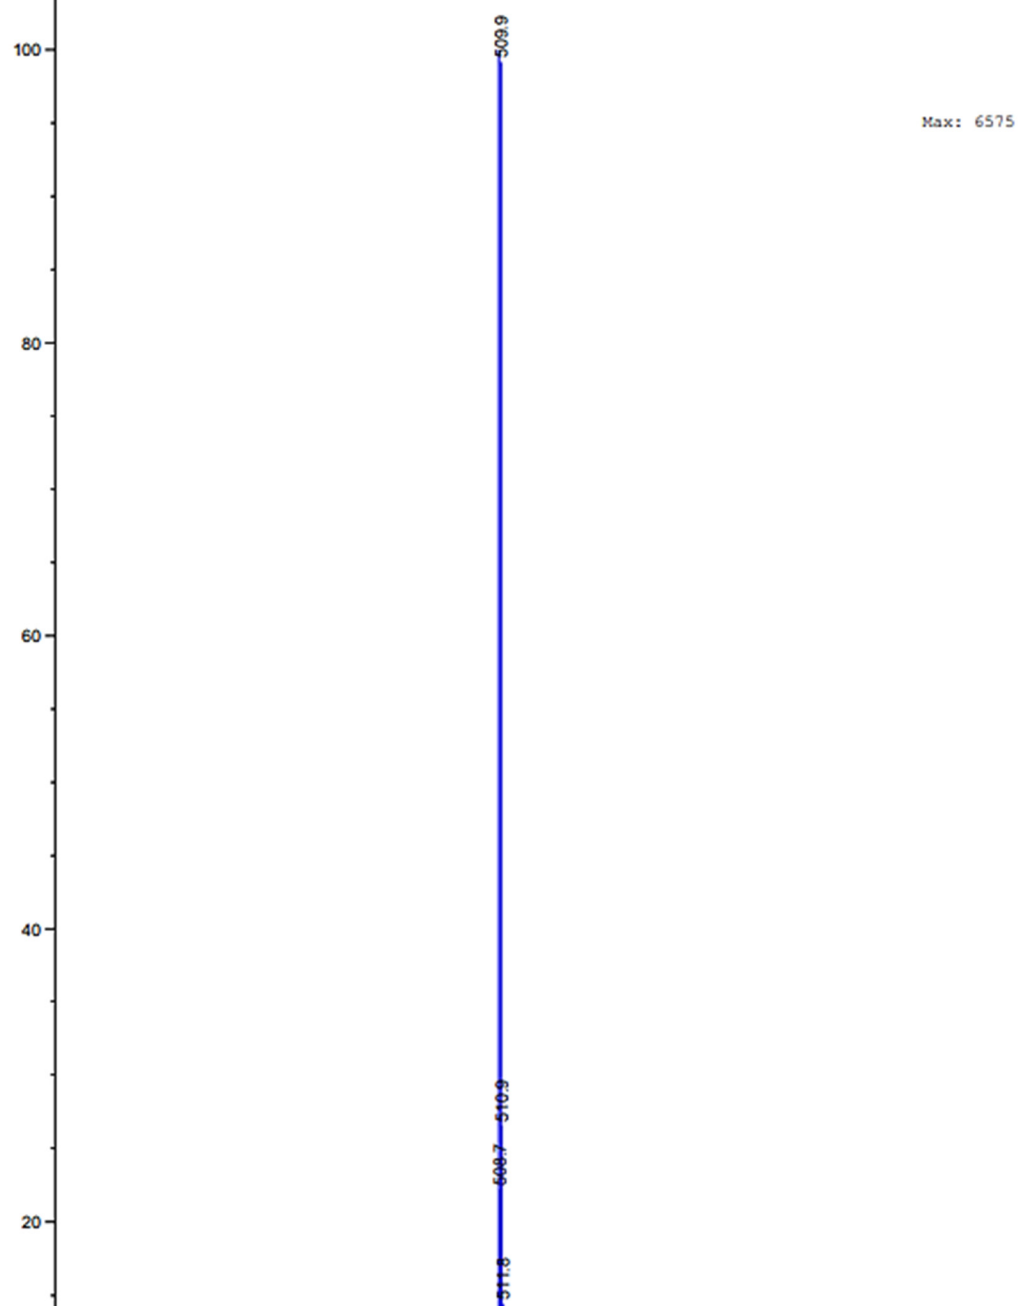

## 6. UV

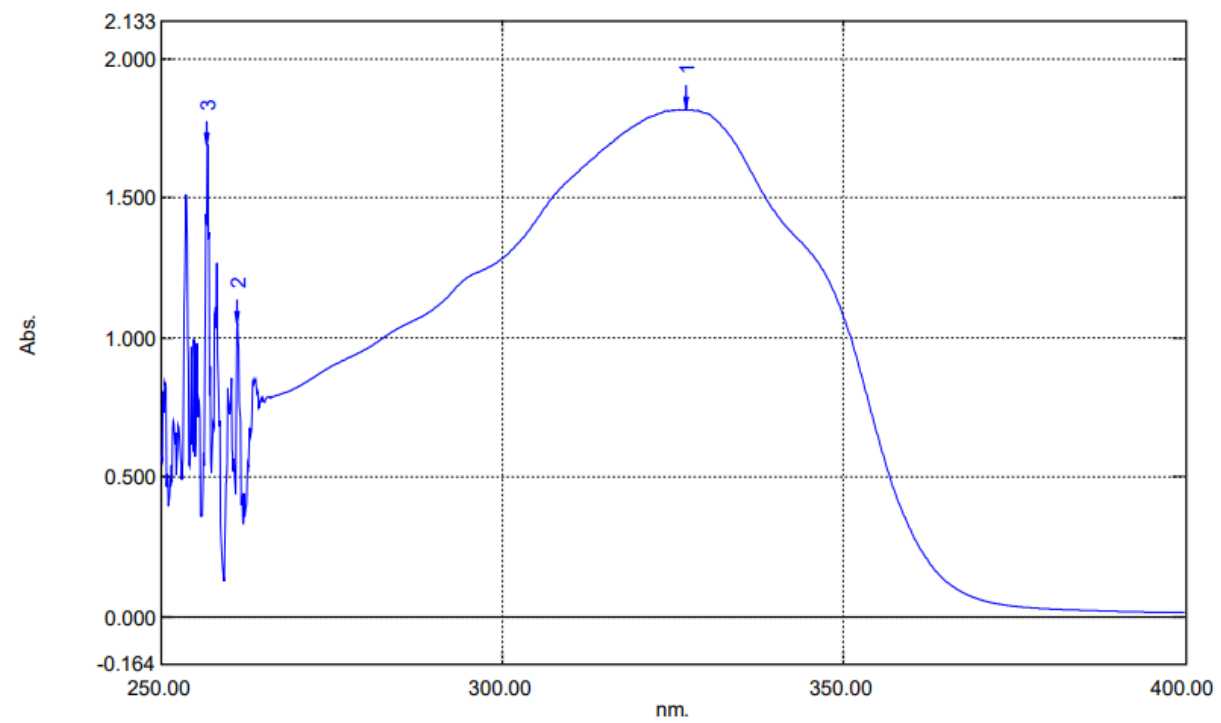

## 2-(5-benzylidene-2,4-dioxothiazolidin-3-yl)-N-(4-methoxybenzo[d]thiazol-2-yl)acetamide (GB8)

### 1. FTIR

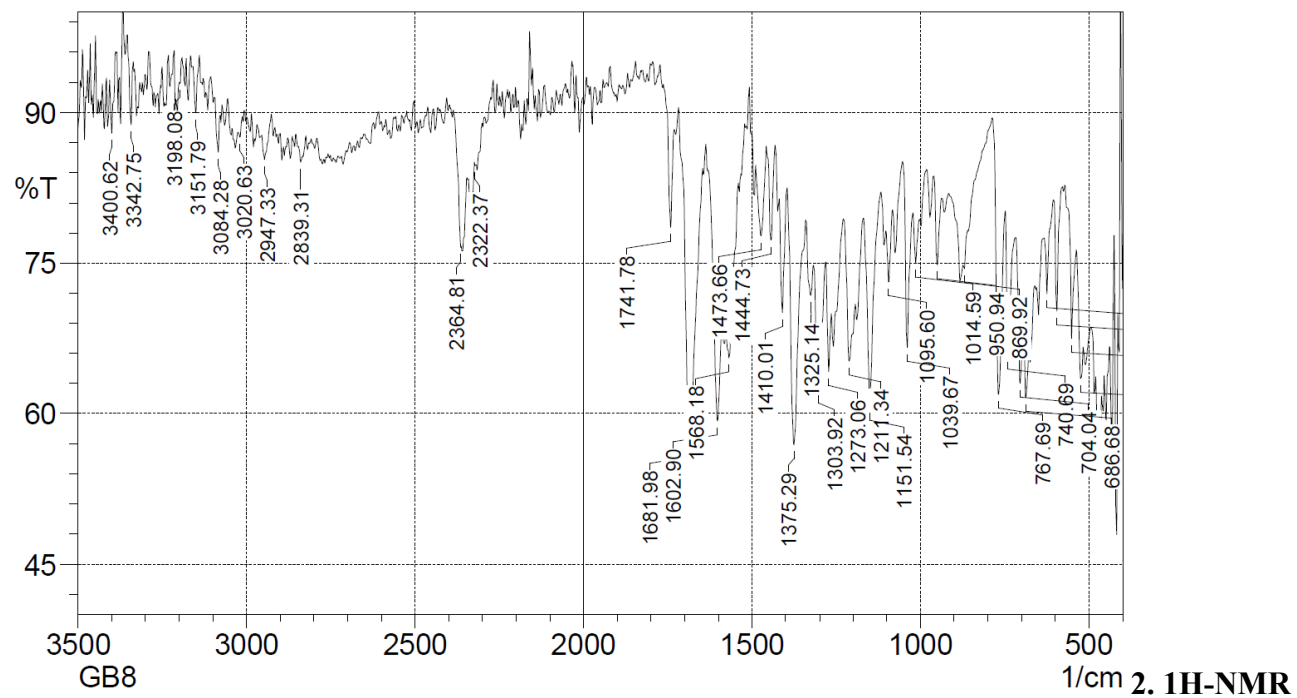

SAIFNM190323A-13(GB8)

SAIF Cochin

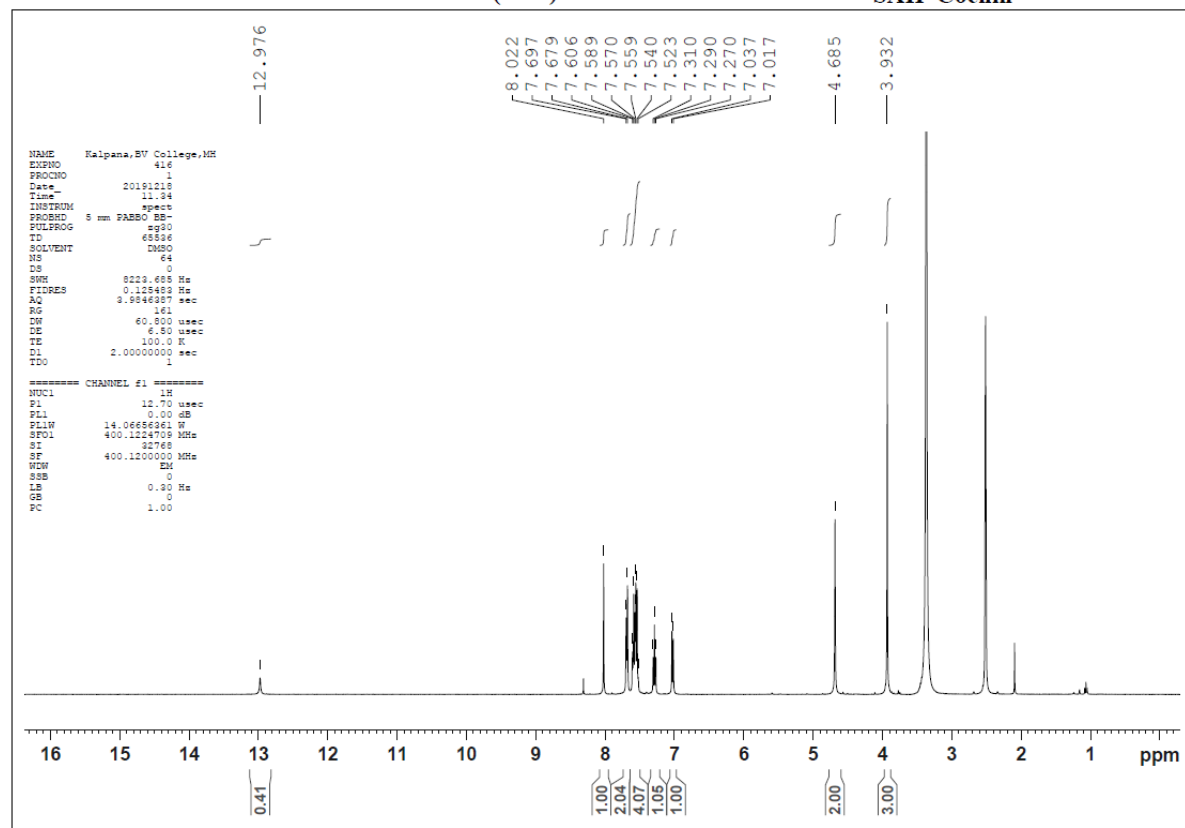

### 3. 13C-NMR

SAIFNM190323A-14(GB8)

SAIF Cochin

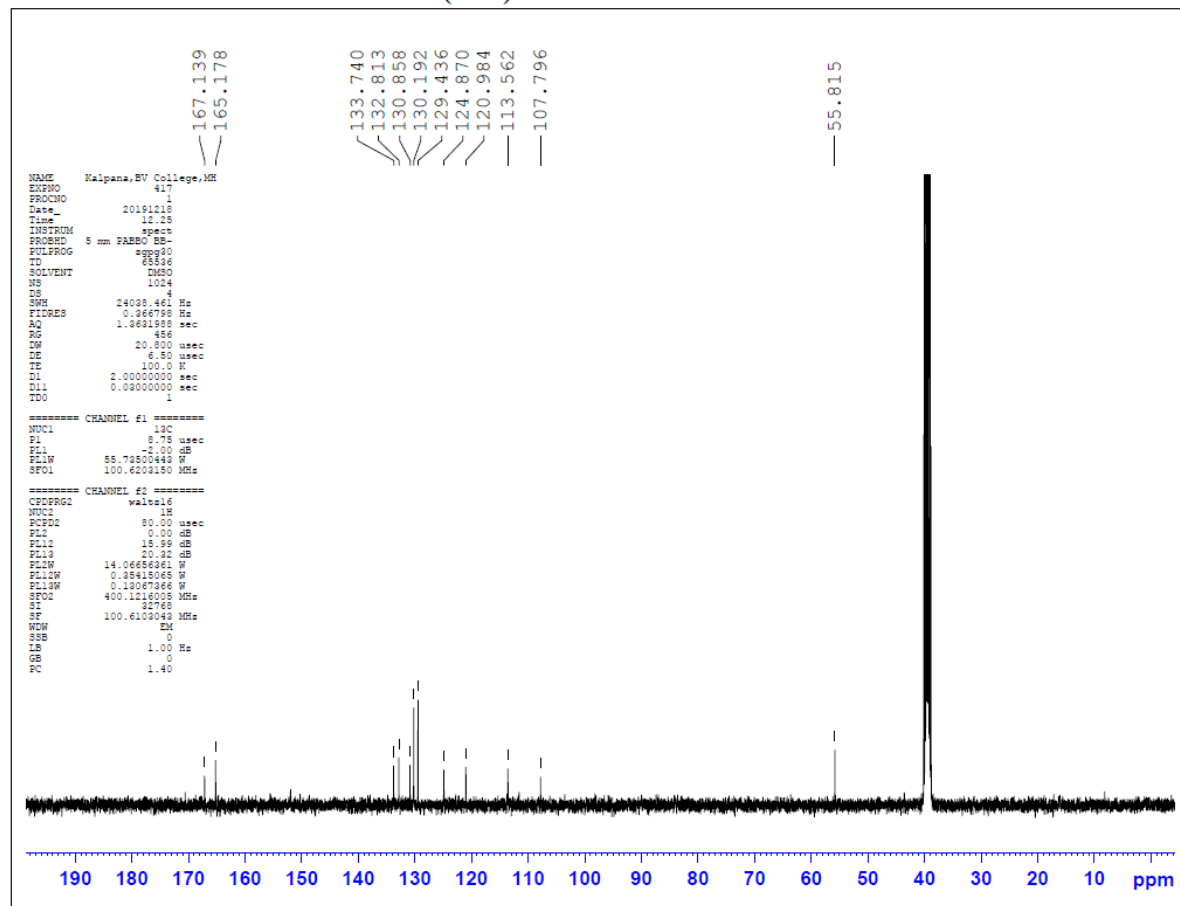

#### 4. HPLC



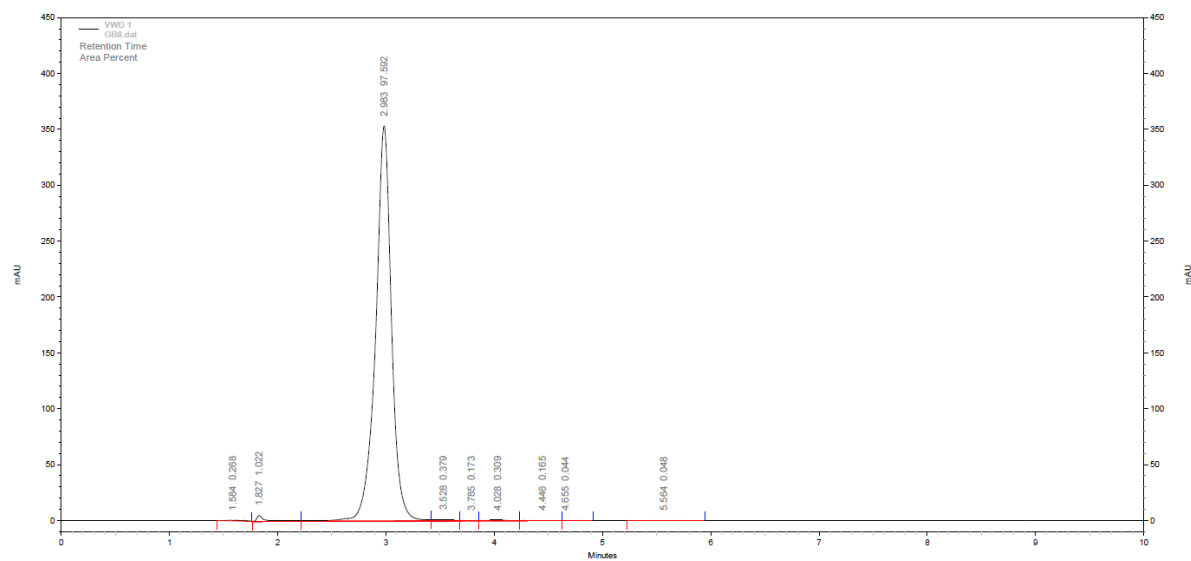

## 4. Mass

MS Spectrum

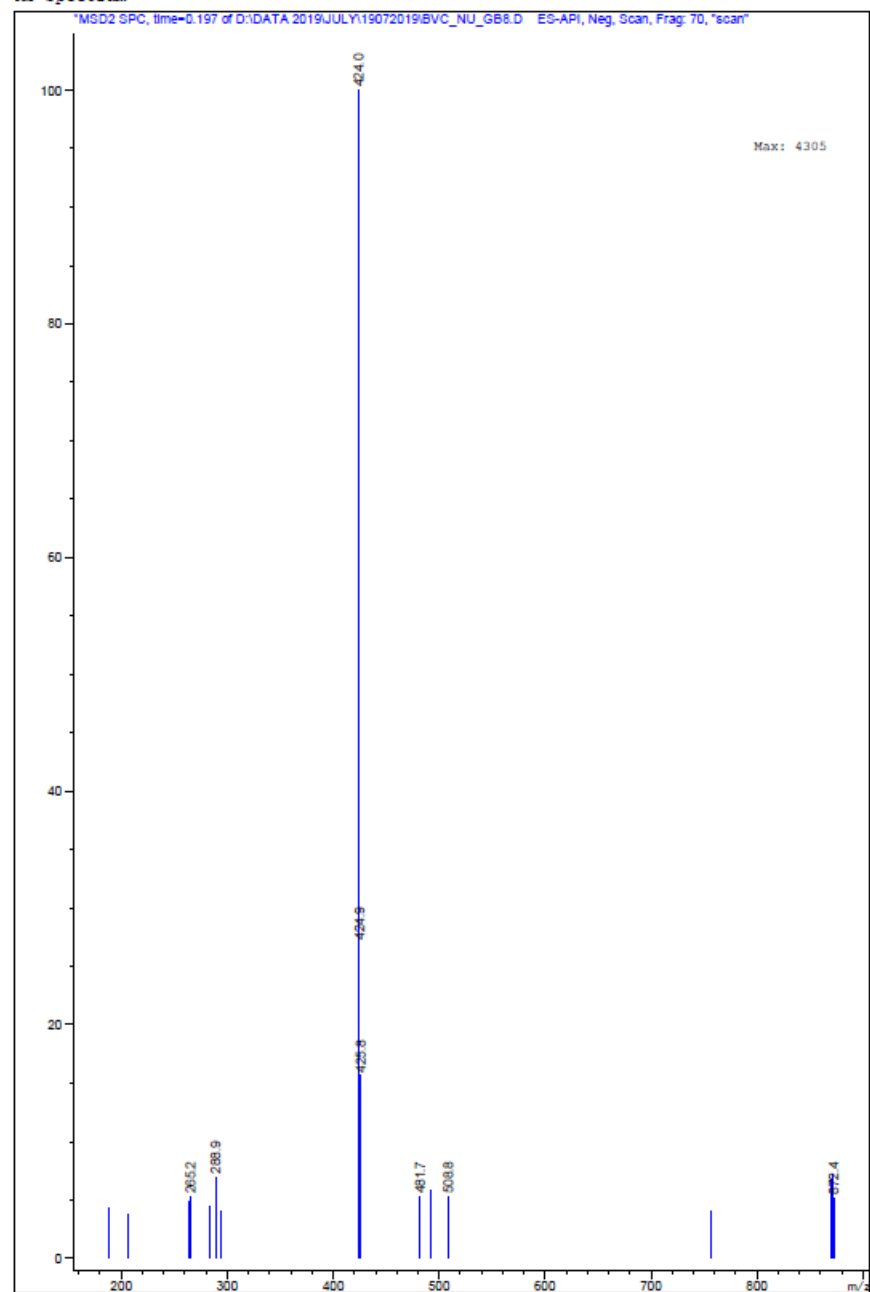

**2-(5-benzylidene-2,4-dioxothiazolidin-3-yl)-N-(4-methylbenzo[d]thiazol-2-yl)acetamide (GB9)**

**1. FTIR –**

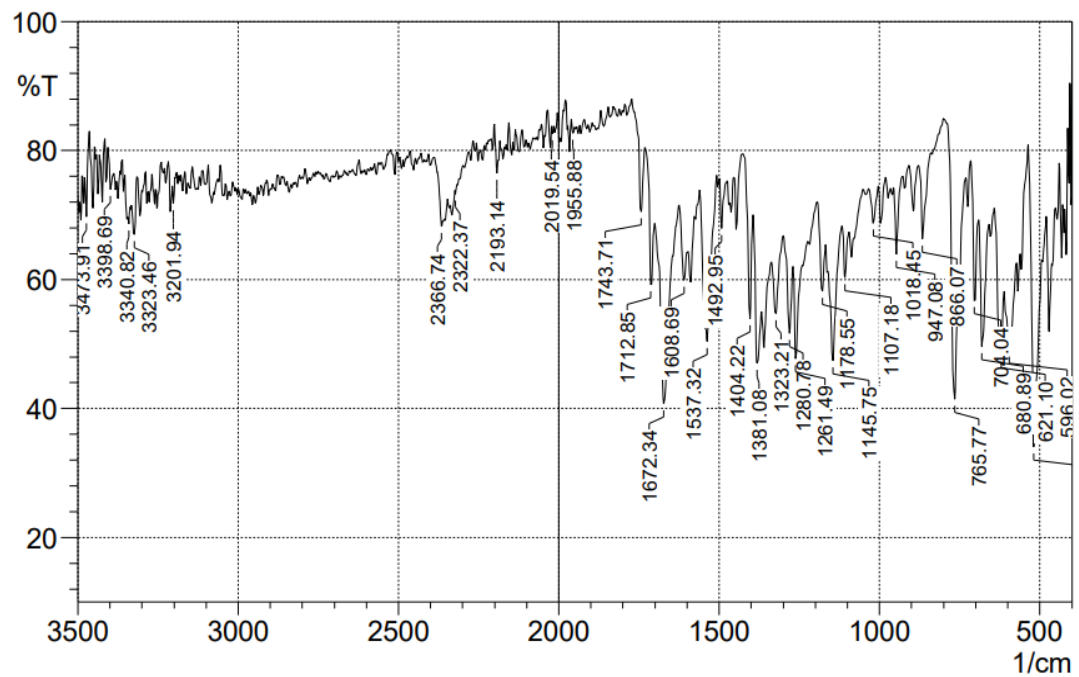

**2. <sup>1</sup>H-NMR**

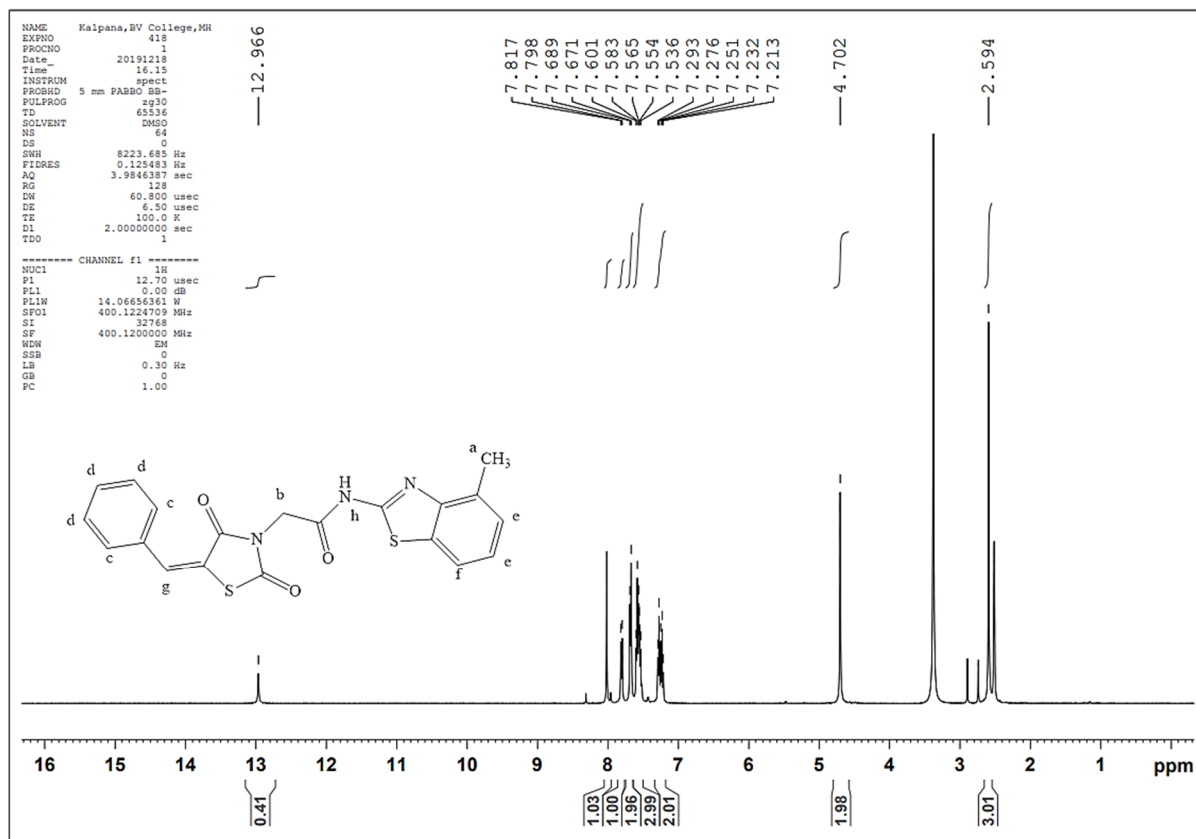

### 3. <sup>13</sup>C-NMR

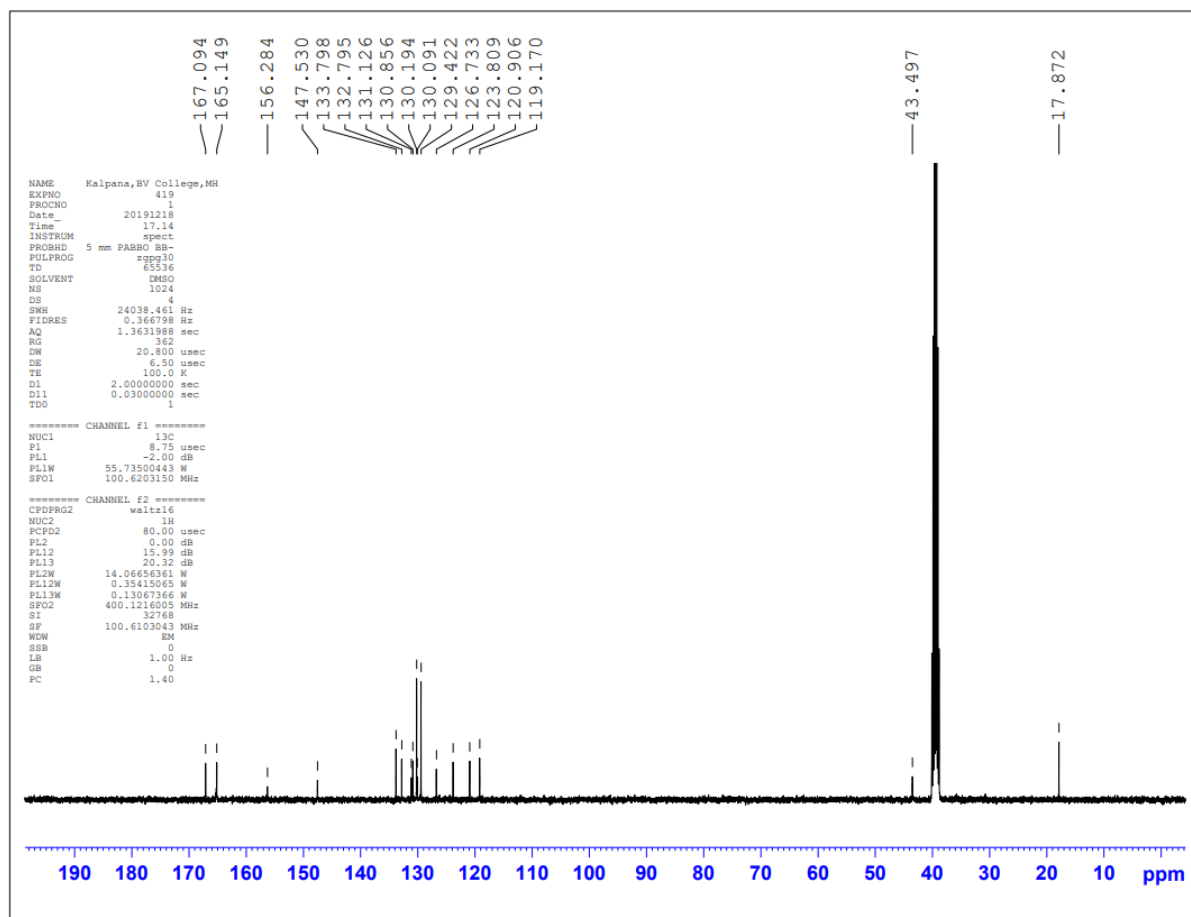

#### 4. HPLC Analysis

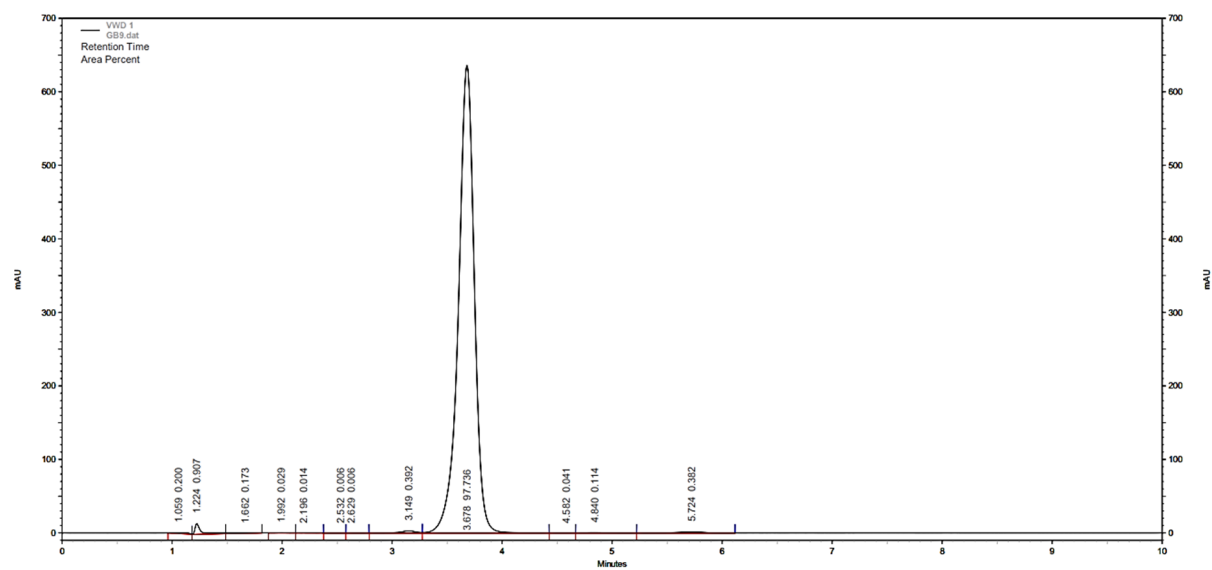

## 5. Mass Spectrometry

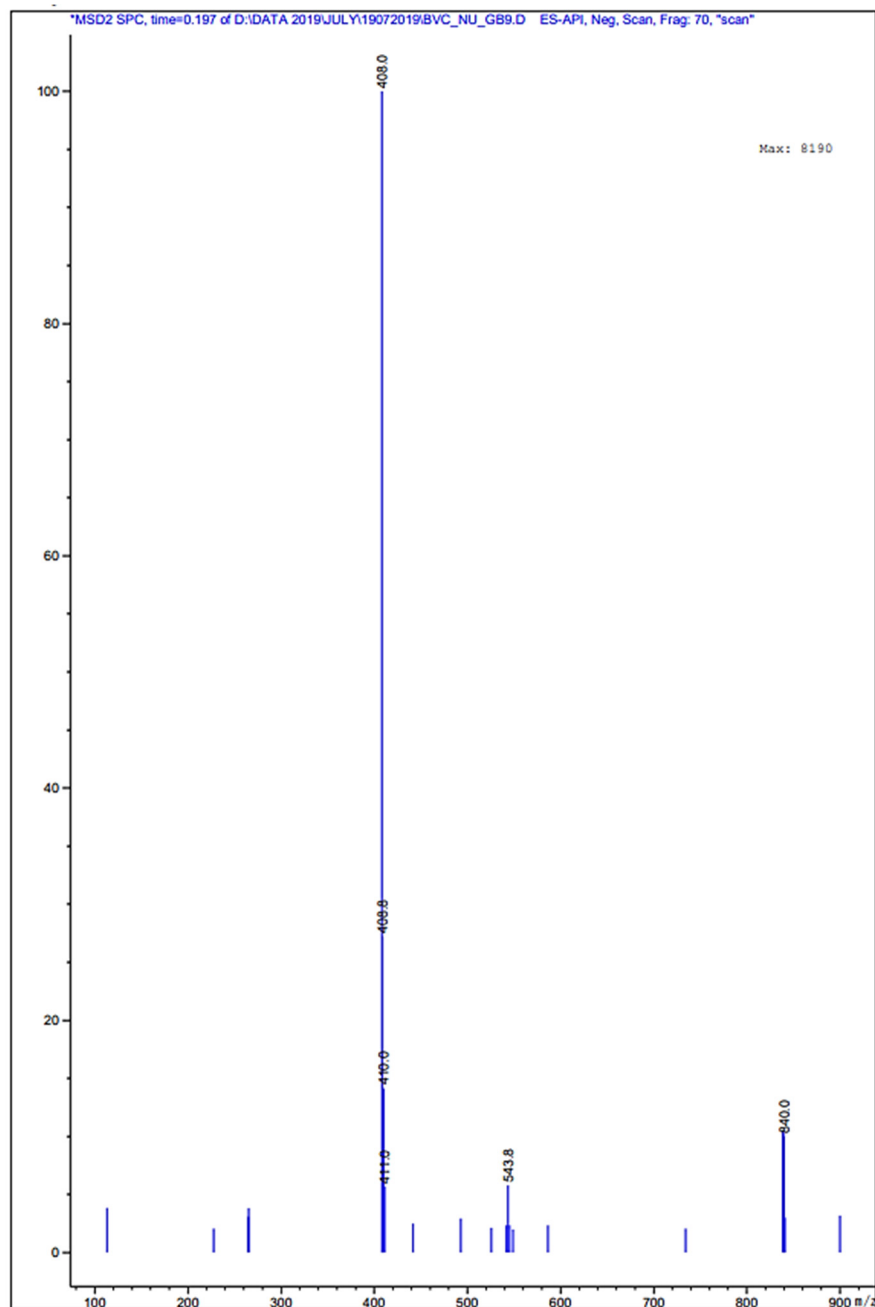

## 6. UV

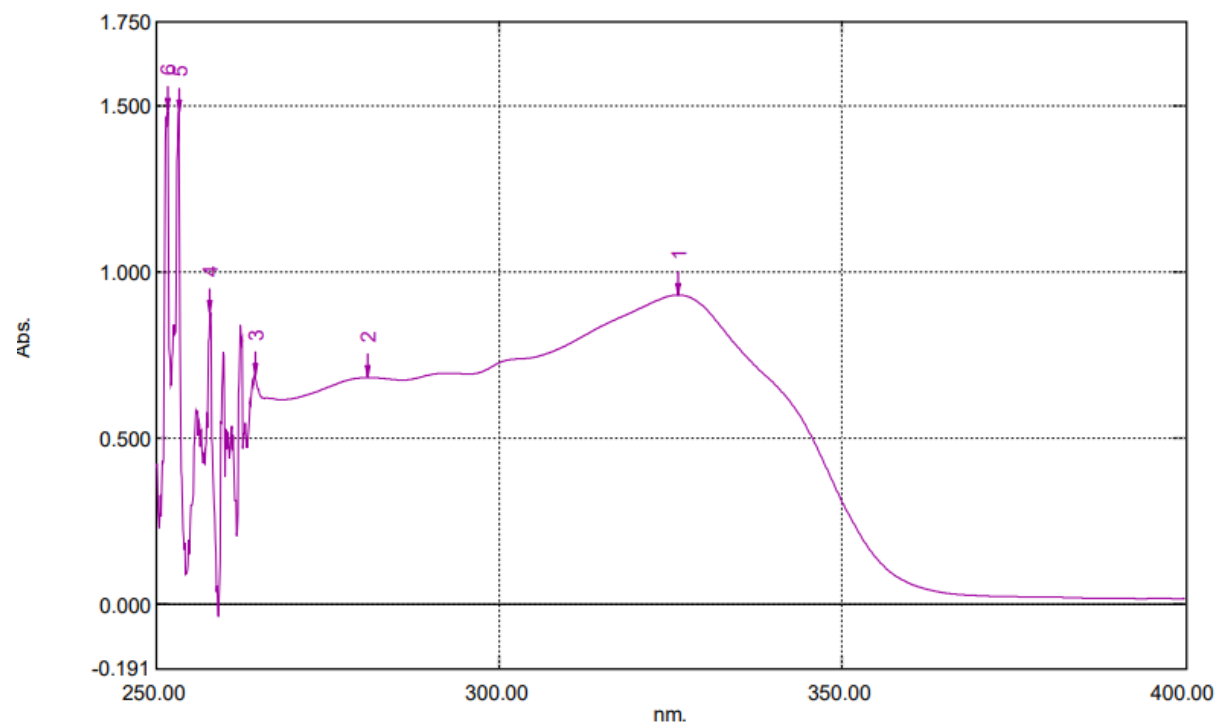



## 2-(5-(4-fluorobenzylidene)-2,4-dioxothiazolidin-3-yl)-N-(4-methylbenzo[d]thiazol-2-yl)acetamide (GB10)

### 1. FTIR

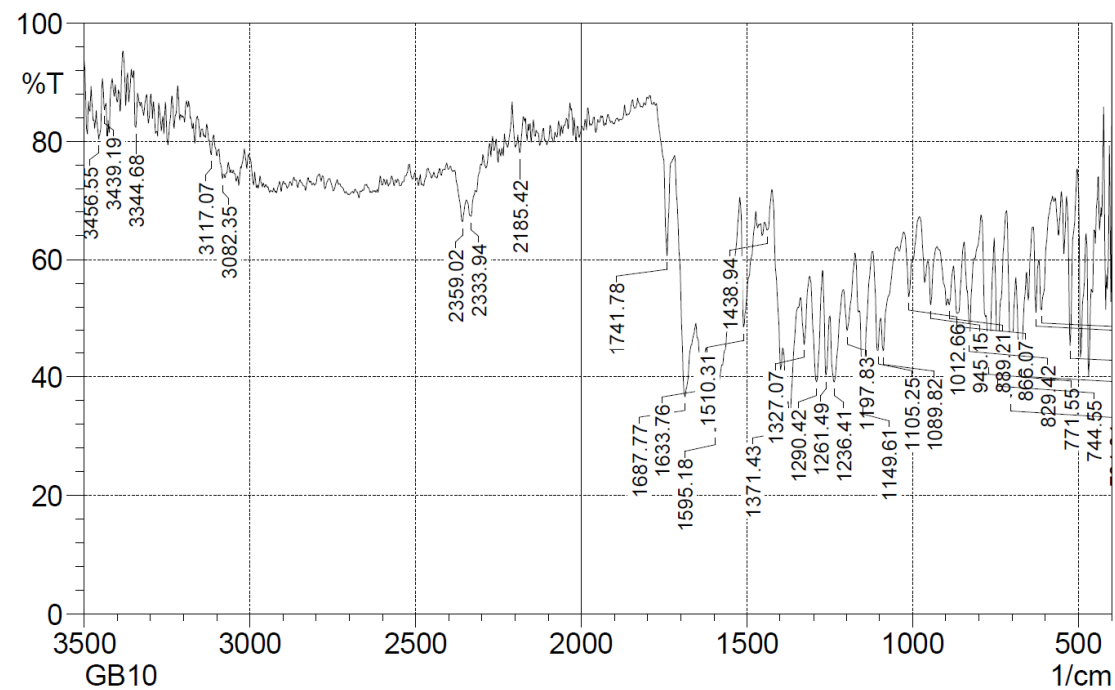

### 2. <sup>1</sup>H-NMR

SAIFNM190323A-17(GB10)

SAIF Cochin

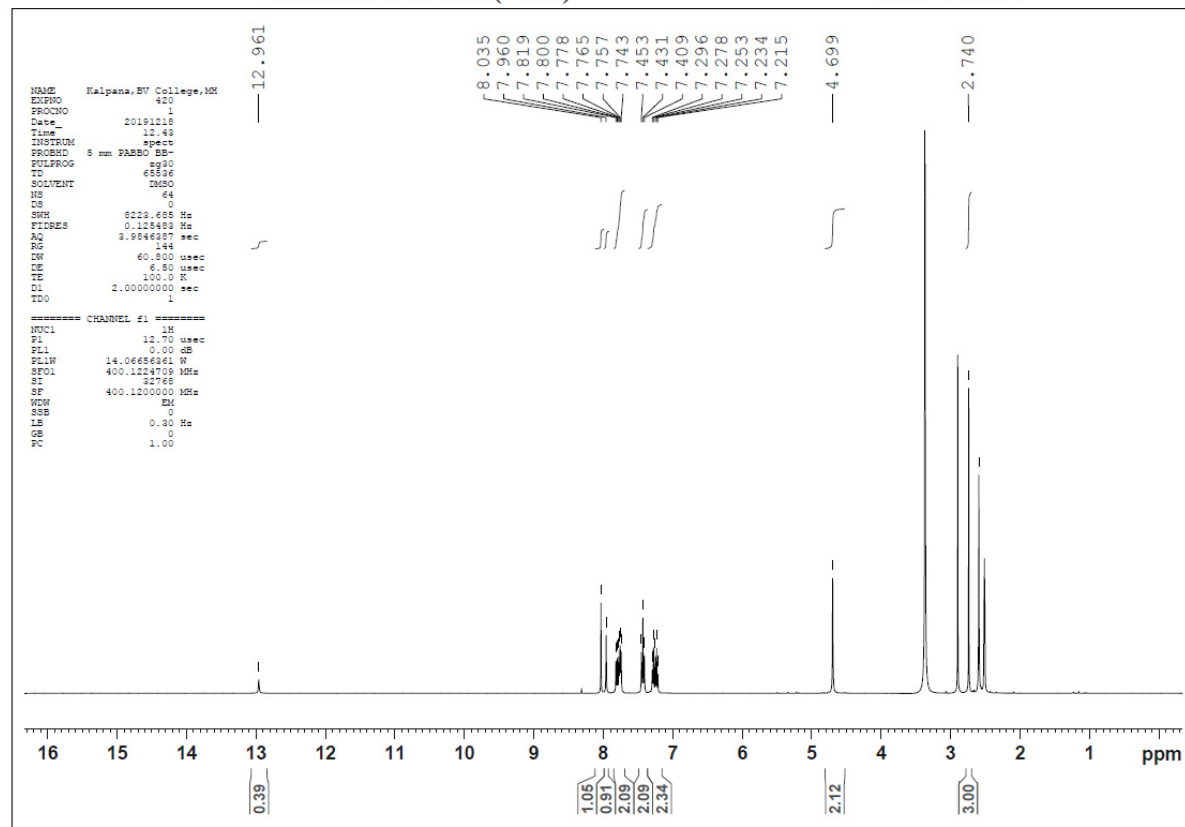

### 3. 13C-NMR

SAIFNM190323A-18(GB10)

SAIF Cochin

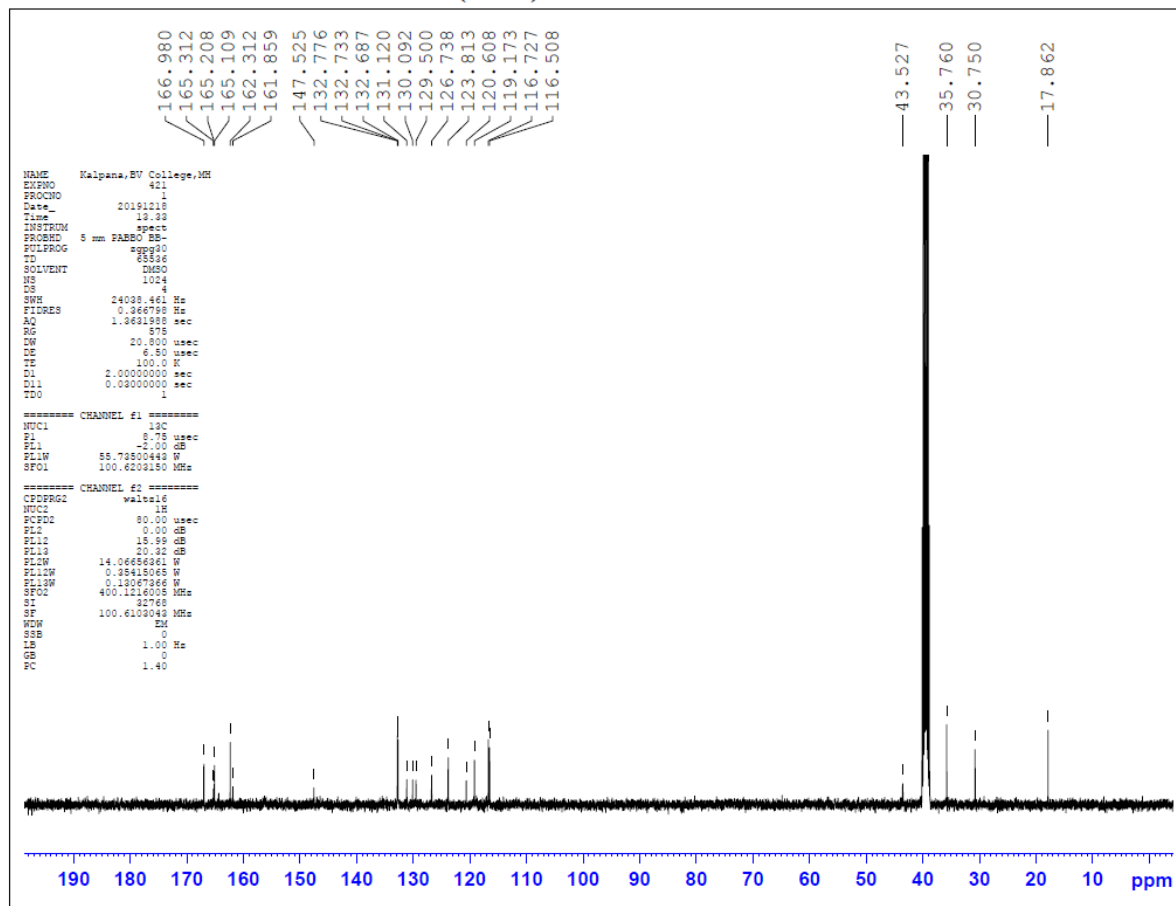

#### 4. HPLC

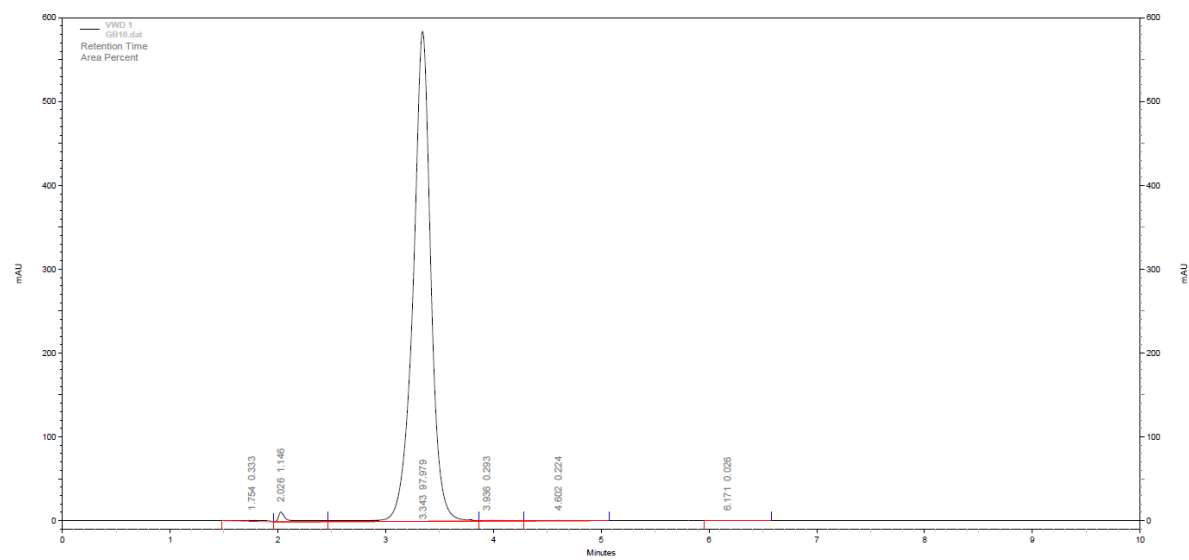

#### 4. Mass

MS Spectrum

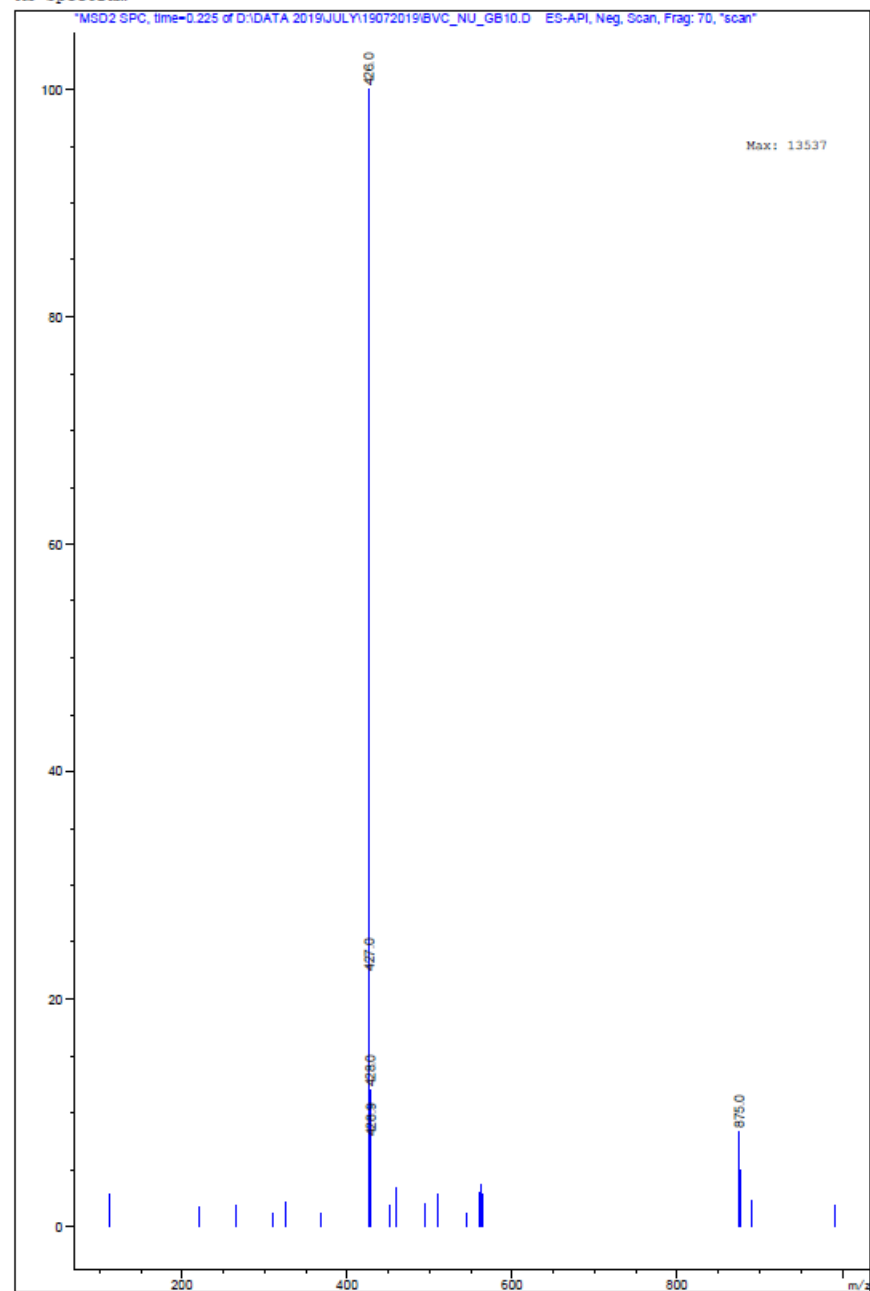

**2-(5-(4-chlorobenzylidene)-2,4-dioxothiazolidin-3-yl)-N-(4,6-difluorobenzo[d]thiazol-2-yl)acetamide (GB11)**

**1. FTIR**

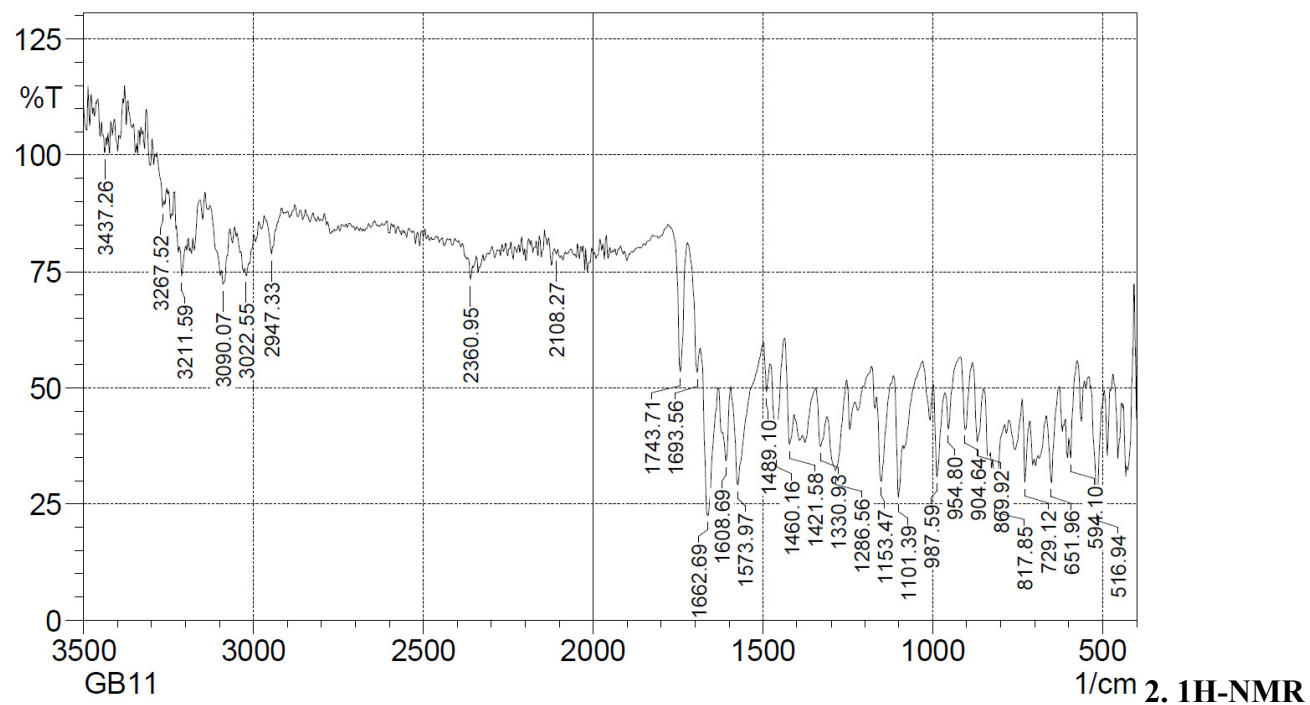

**2.  $^1\text{H-NMR}$**

SAIFNM190323A-19(GB11)

SAIF Cochin

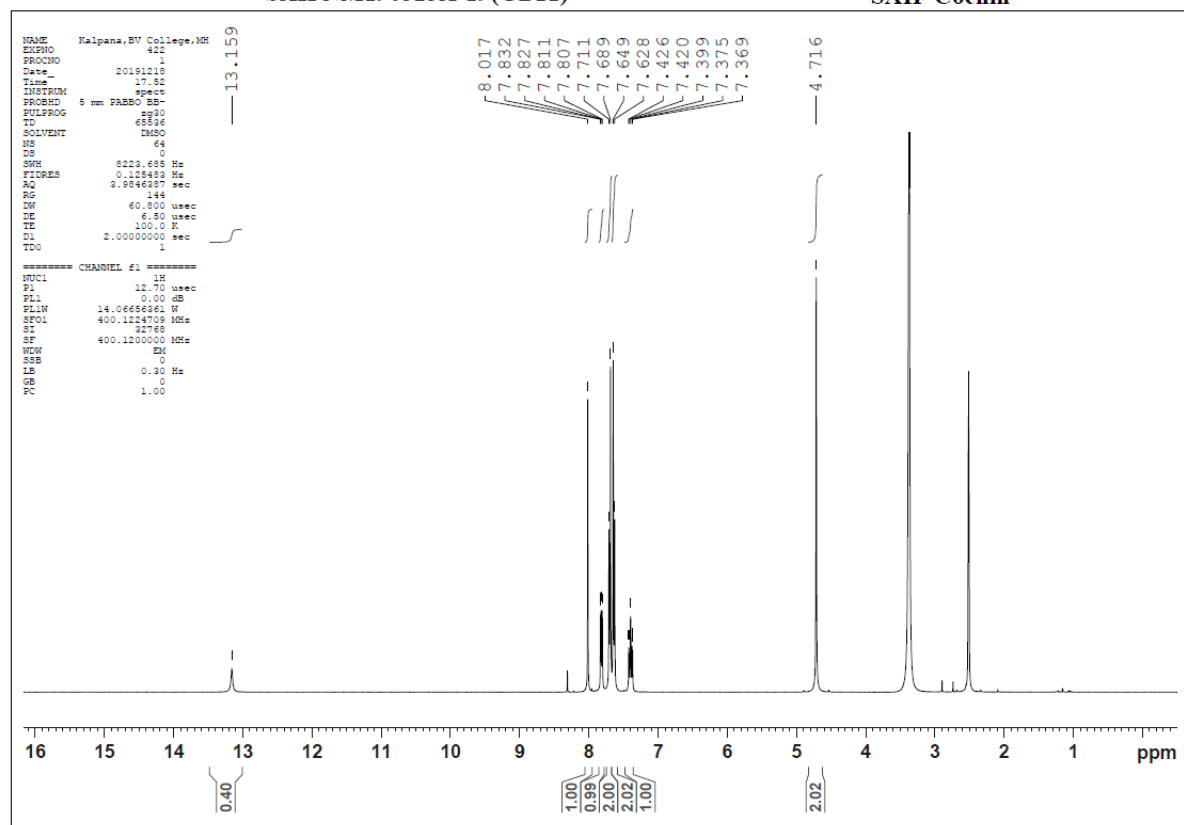

### 3. 13C-NMR

SAIFNM190323A-20(GB11)

SAIF Cochin

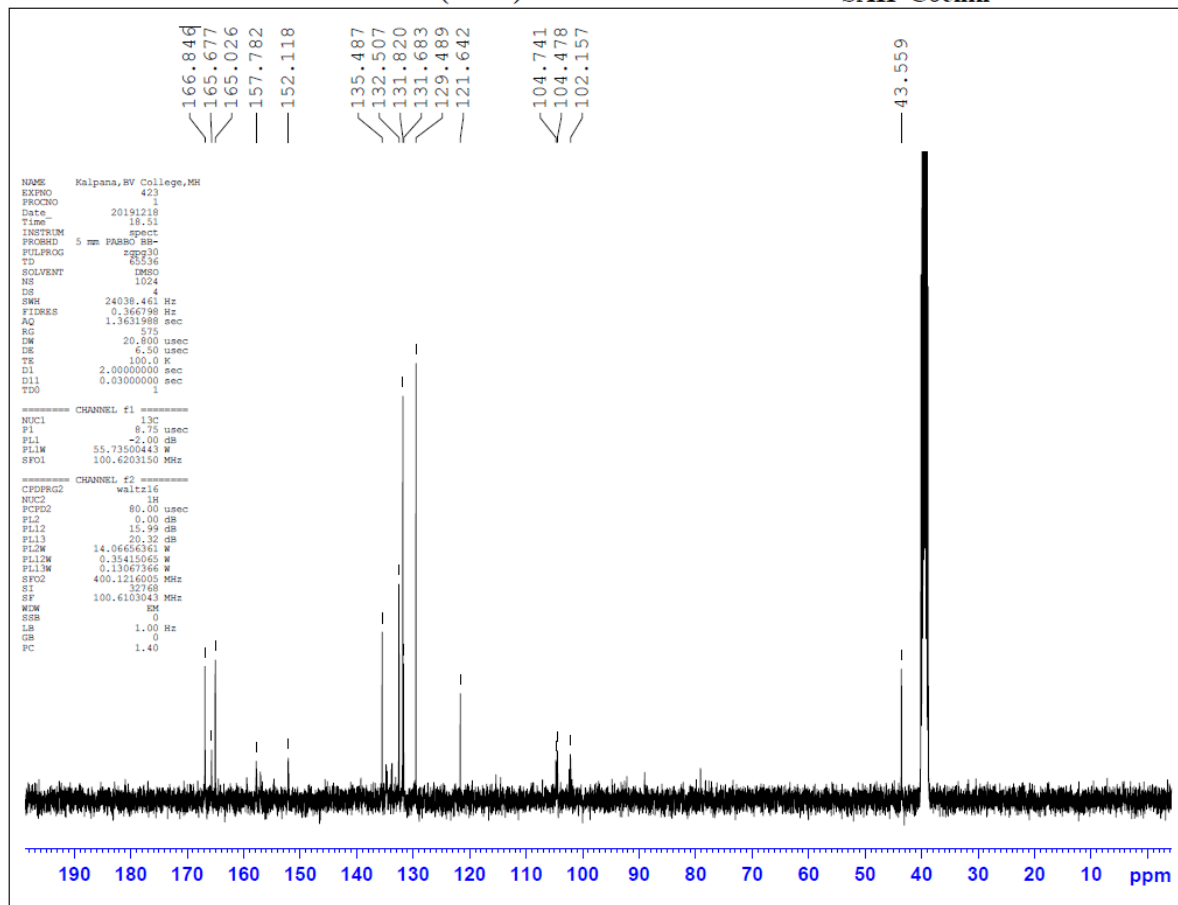

#### 4. HPLC



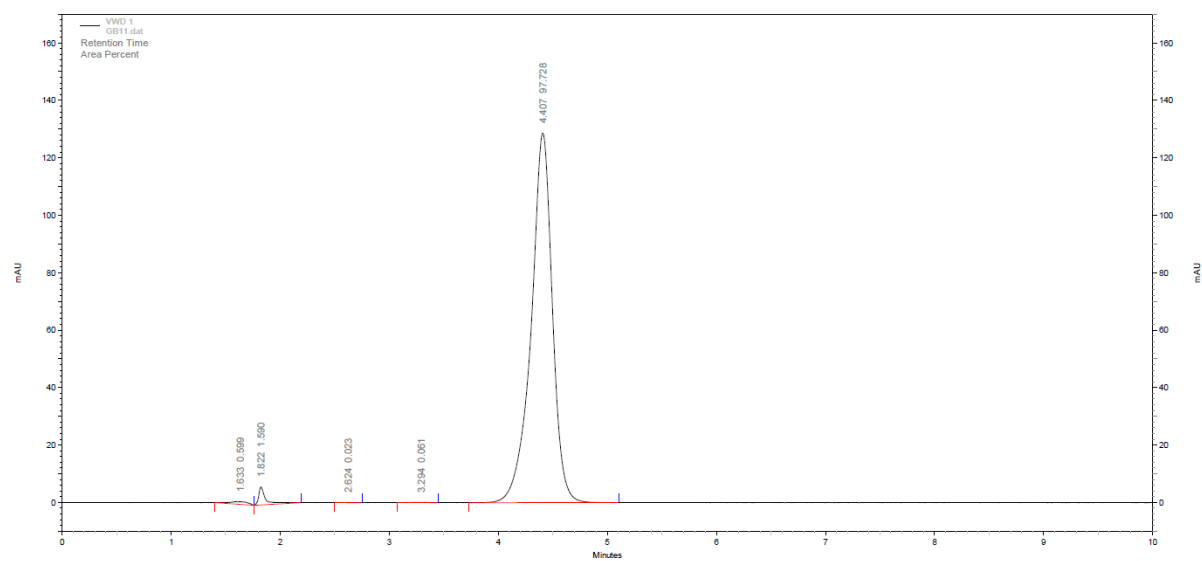

## 5. Mass

MS Spectrum

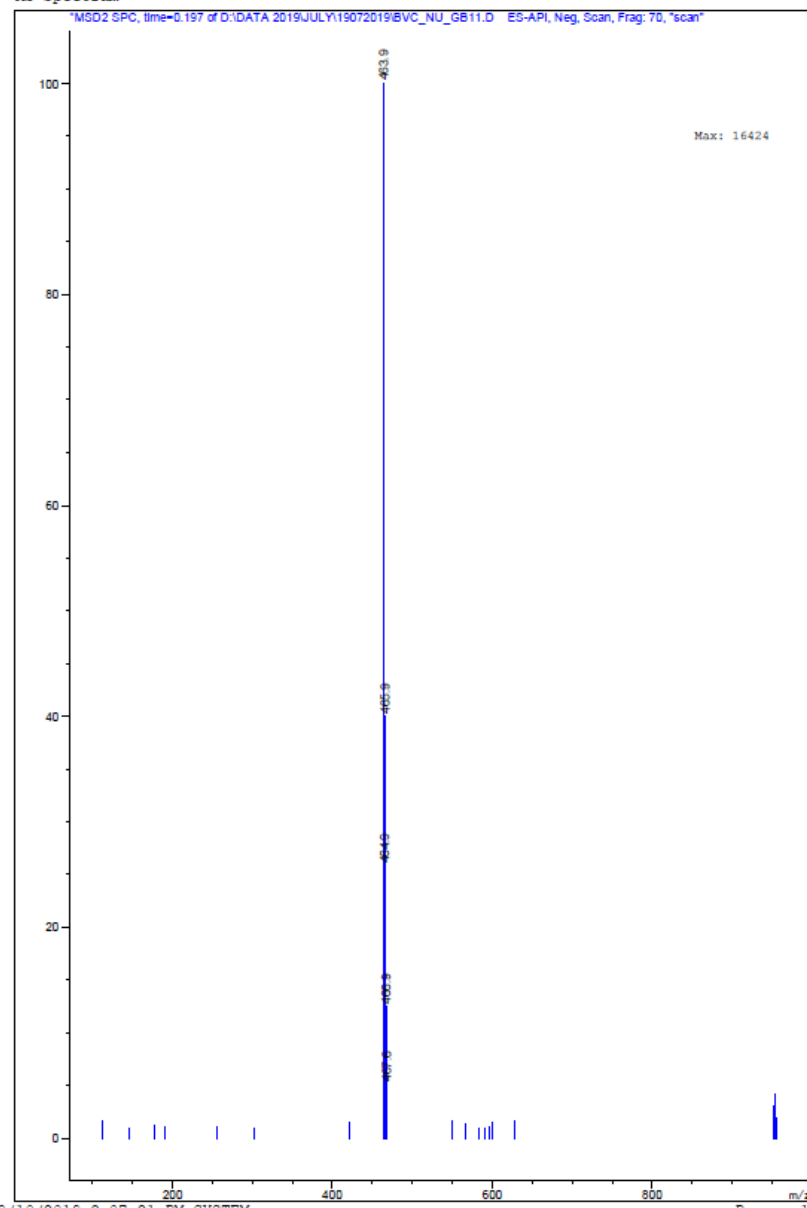

## 2-(5-benzylidene-2,4-dioxothiazolidin-3-yl)-N-(4,6-difluorobenzo[d]thiazol-2-yl)acetamide (GB12)

### 1. FTIR

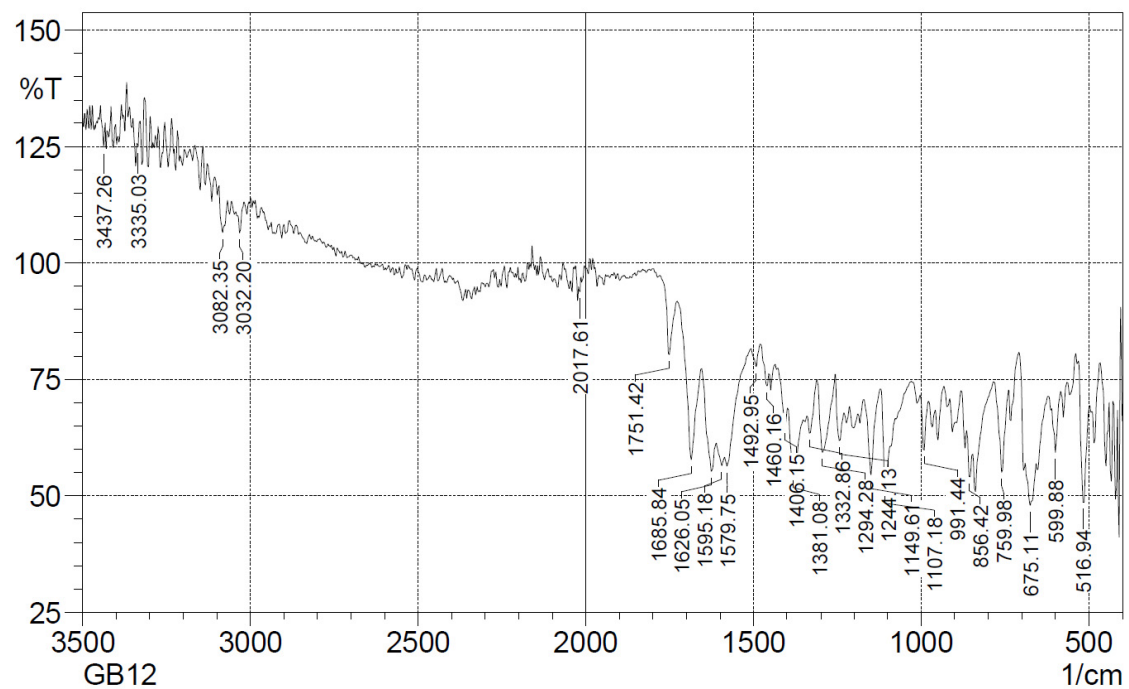

### 2. $^1\text{H-NMR}$

SAIFNM190323A-21(GB12)

SAIF Cochin

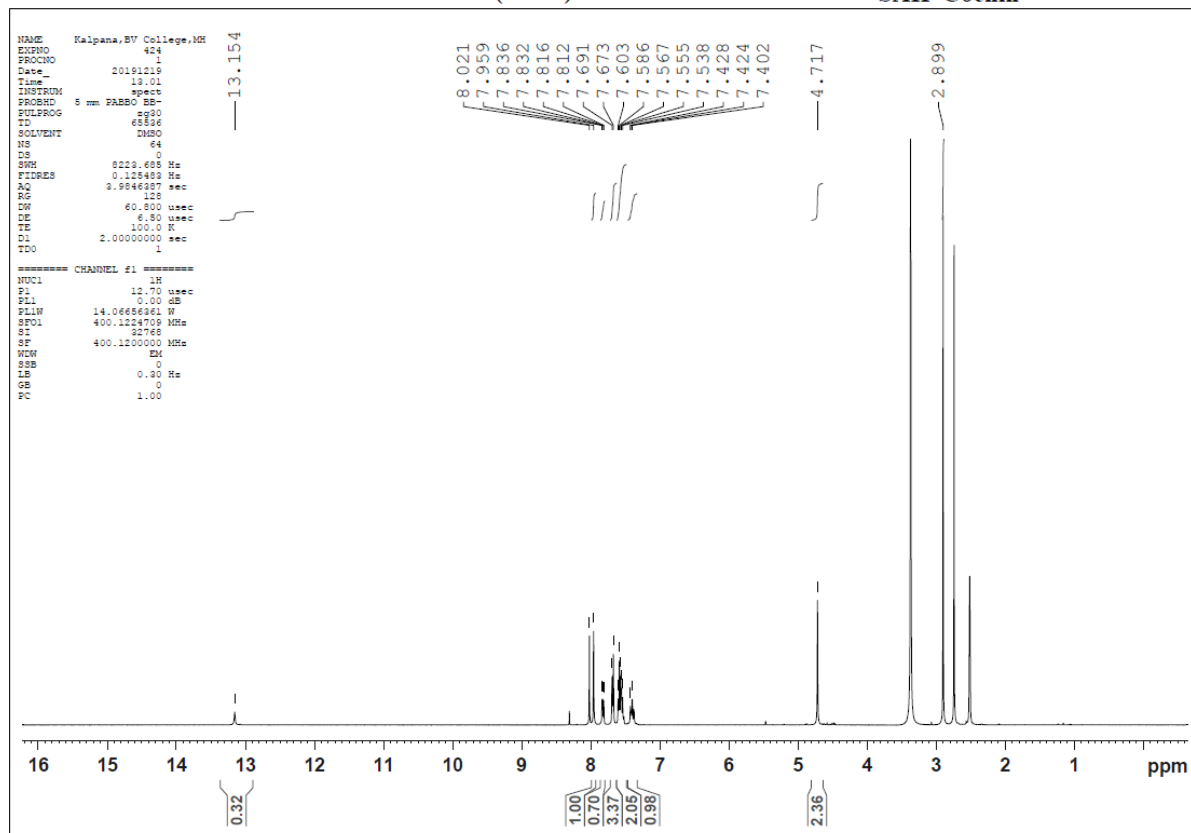

### 3. <sup>13</sup>C-NMR

SAIFNM190323A-22(GB12)

SAIF Cochin

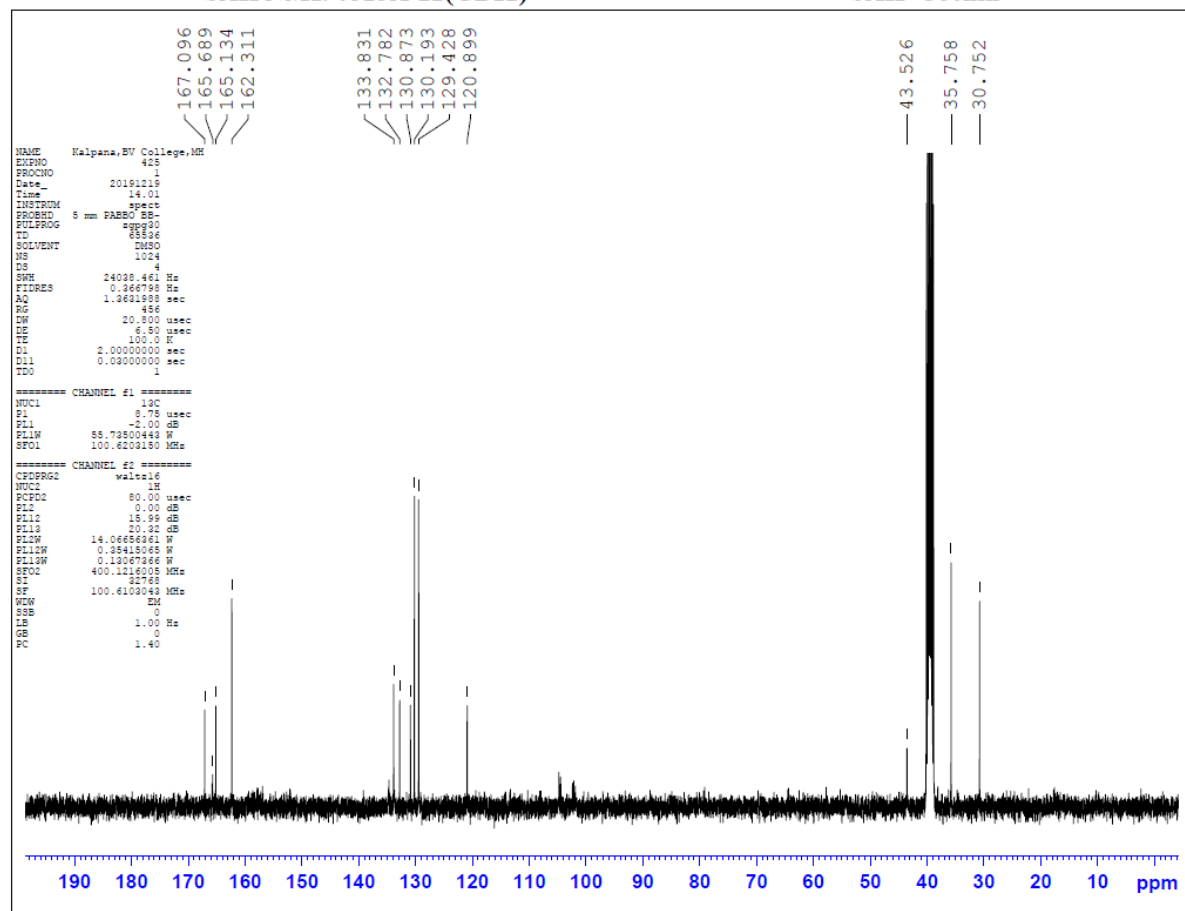

#### 4. HPLC

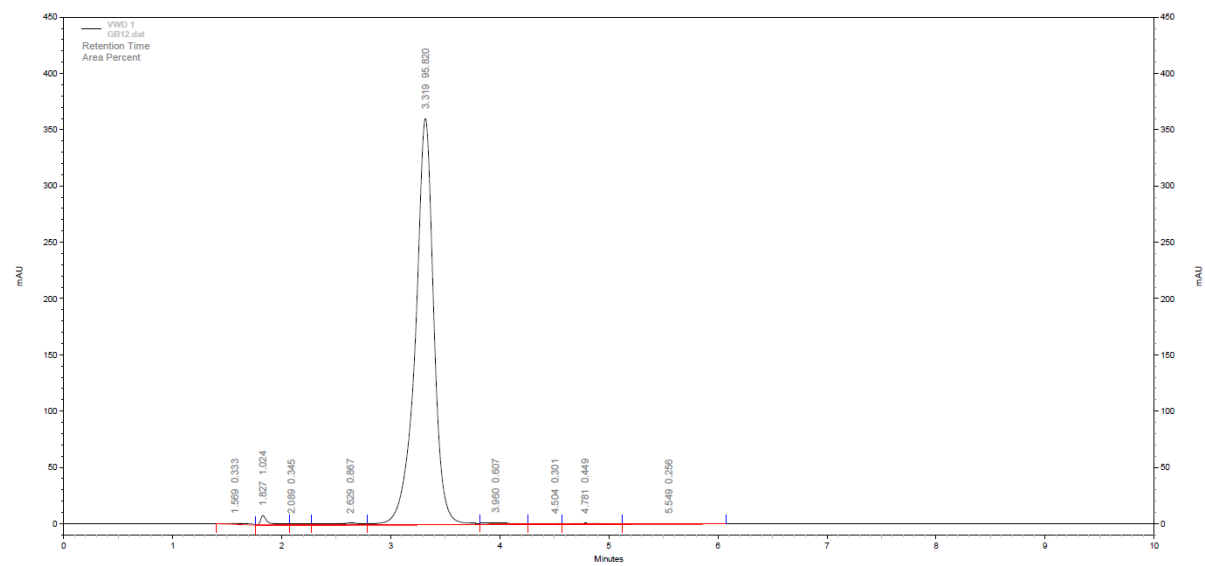

## 5. Mass

MS Spectrum

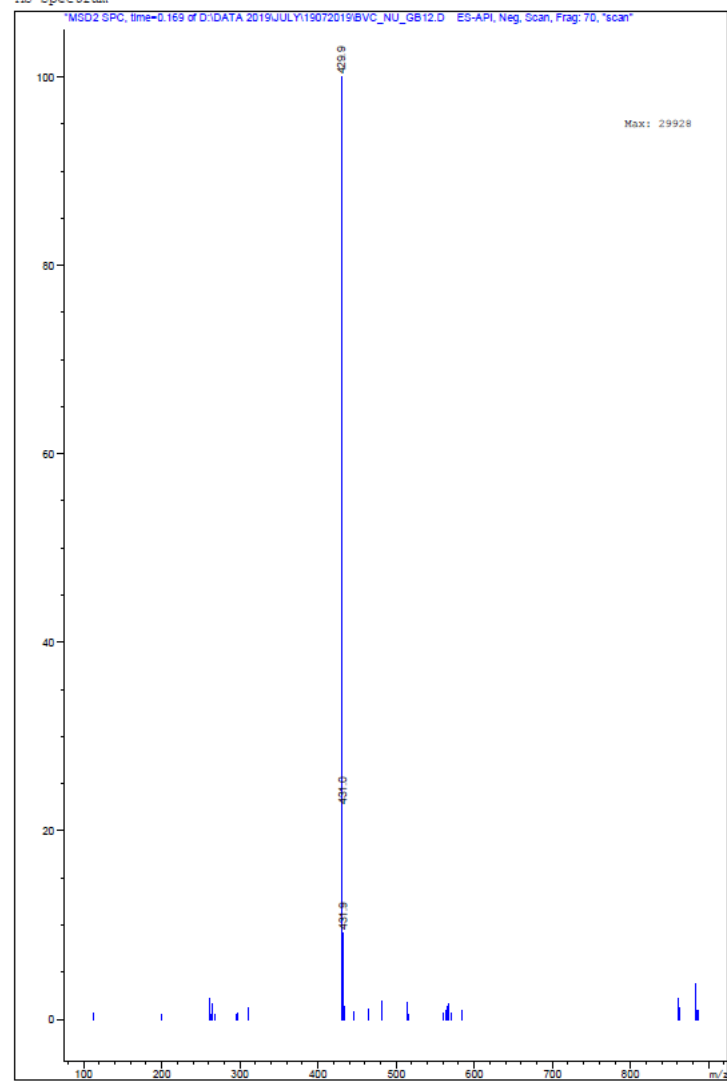

## 2-(5-(2,4-difluorobenzylidene)-2,4-dioxothiazolidin-3-yl)-N-(6-methylbenzo[d]thiazol-2-yl)acetamide (GB13)

### 1. FTIR

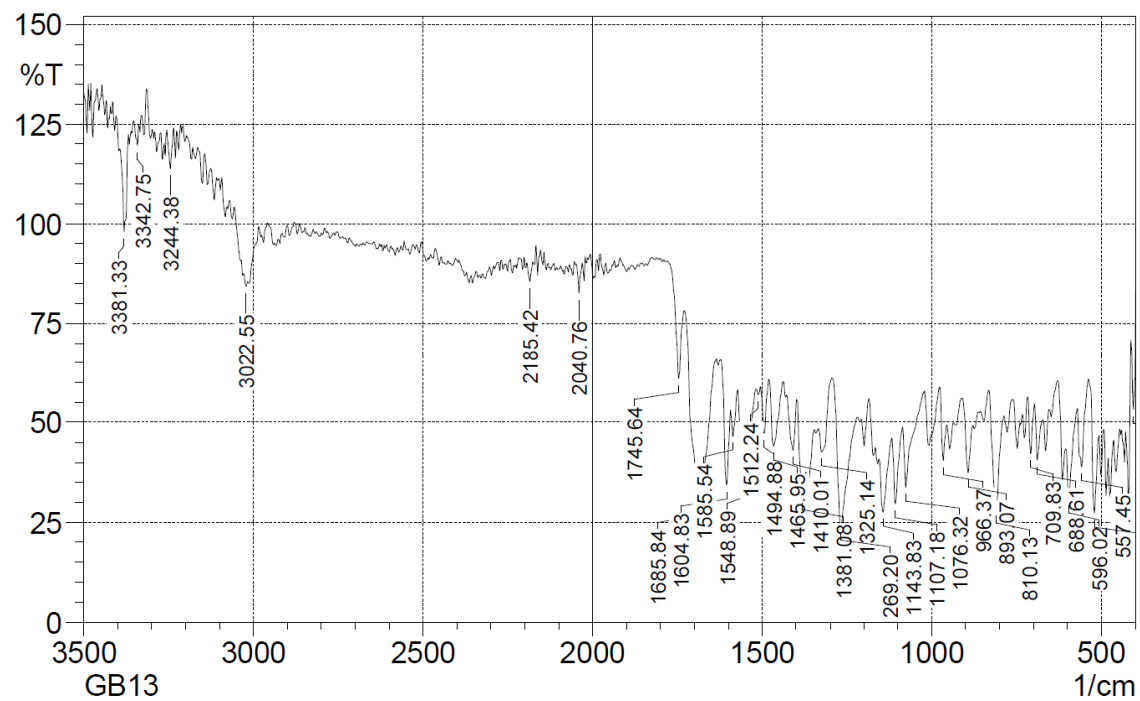

### 2. $^1\text{H}$ -NMR



SAIFNM190323A-23(GB13)

SAIF Cochin

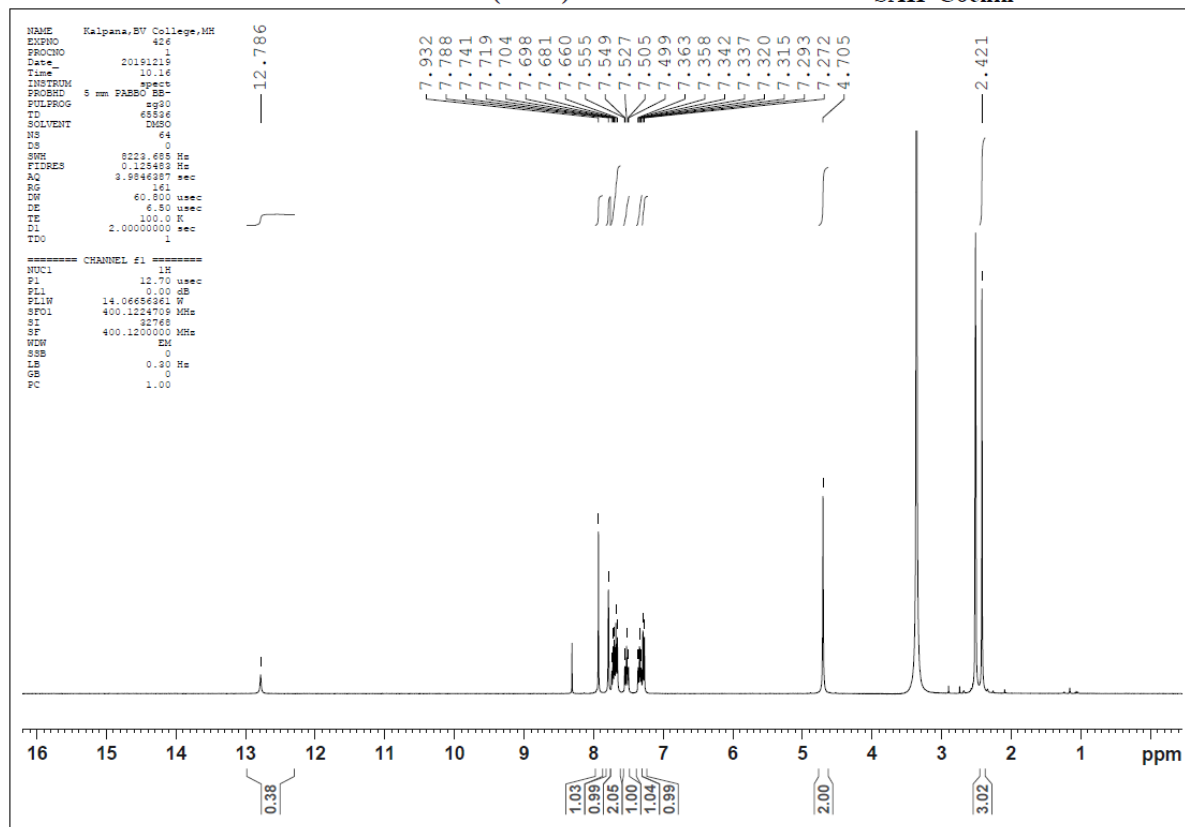

### 3. 13C-NMR

SAIFNM190323A-24(GB13)

SAIF Cochin

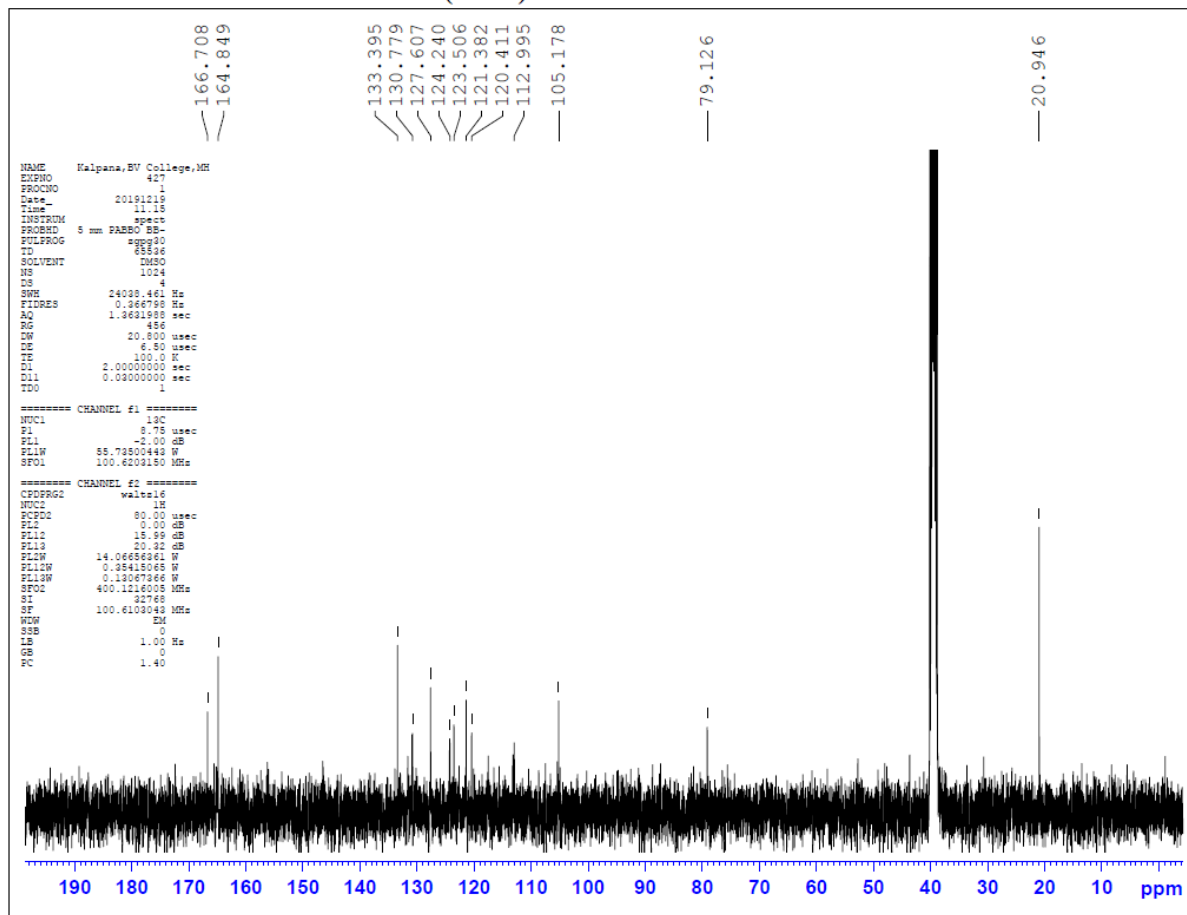

#### 4. HPLC

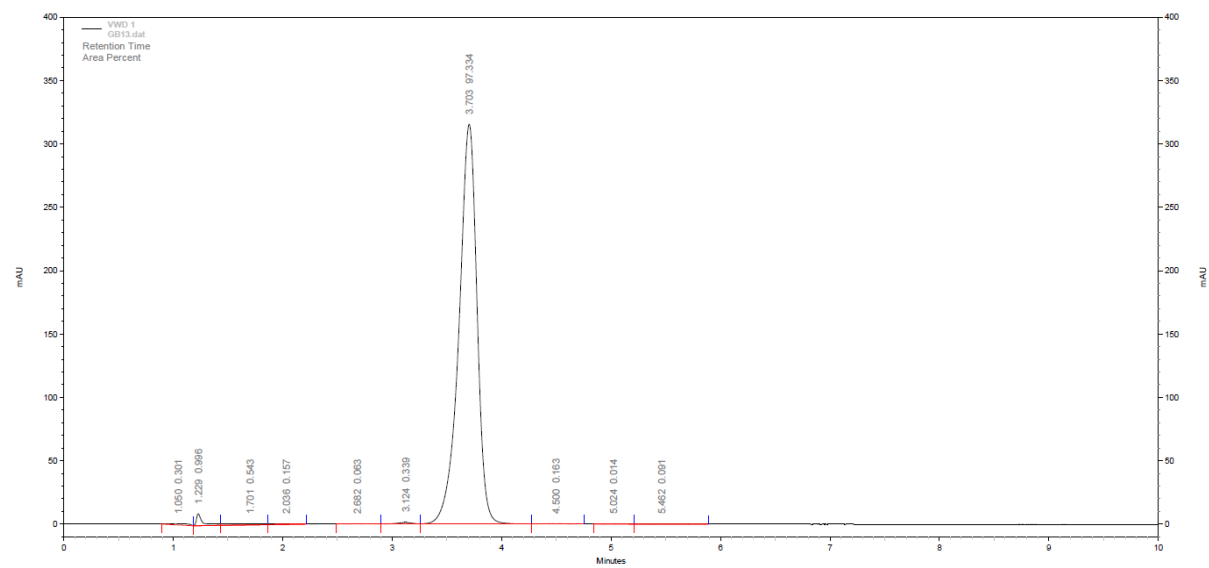

## 5. Mass



**N-(6-methylbenzo[d]thiazol-2-yl)-2-(5-(4-methylbenzylidene)-2,4-dioxothiazolidin-3-yl)acetamide (GB14)**

**1. FTIR**

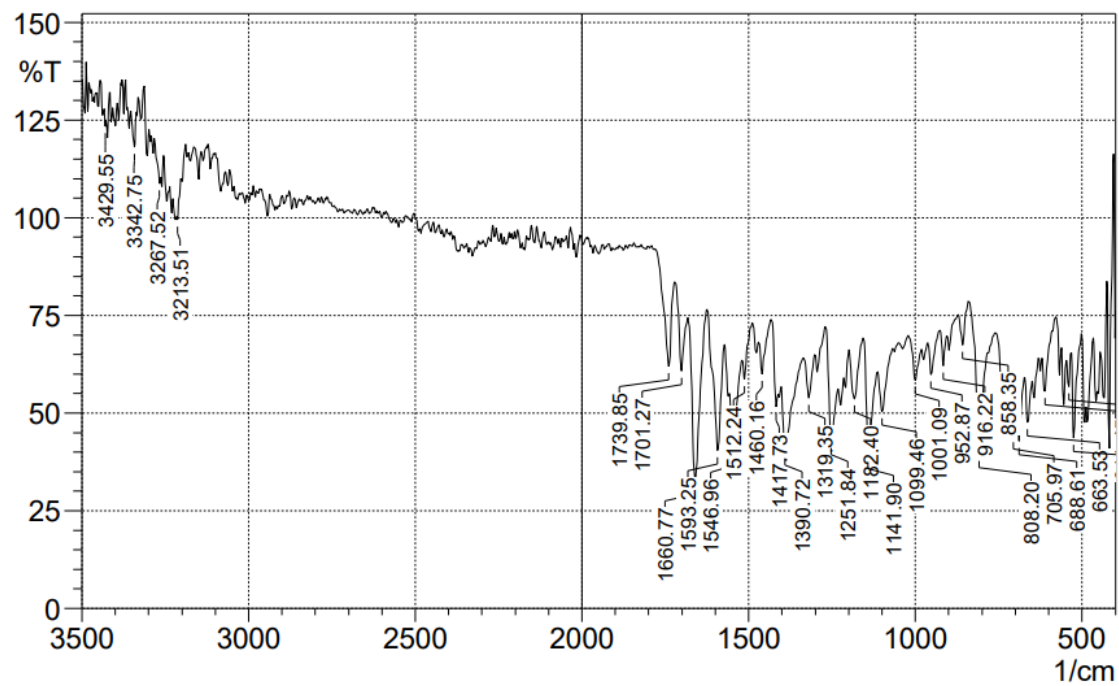

**2. <sup>1</sup>H-NMR**

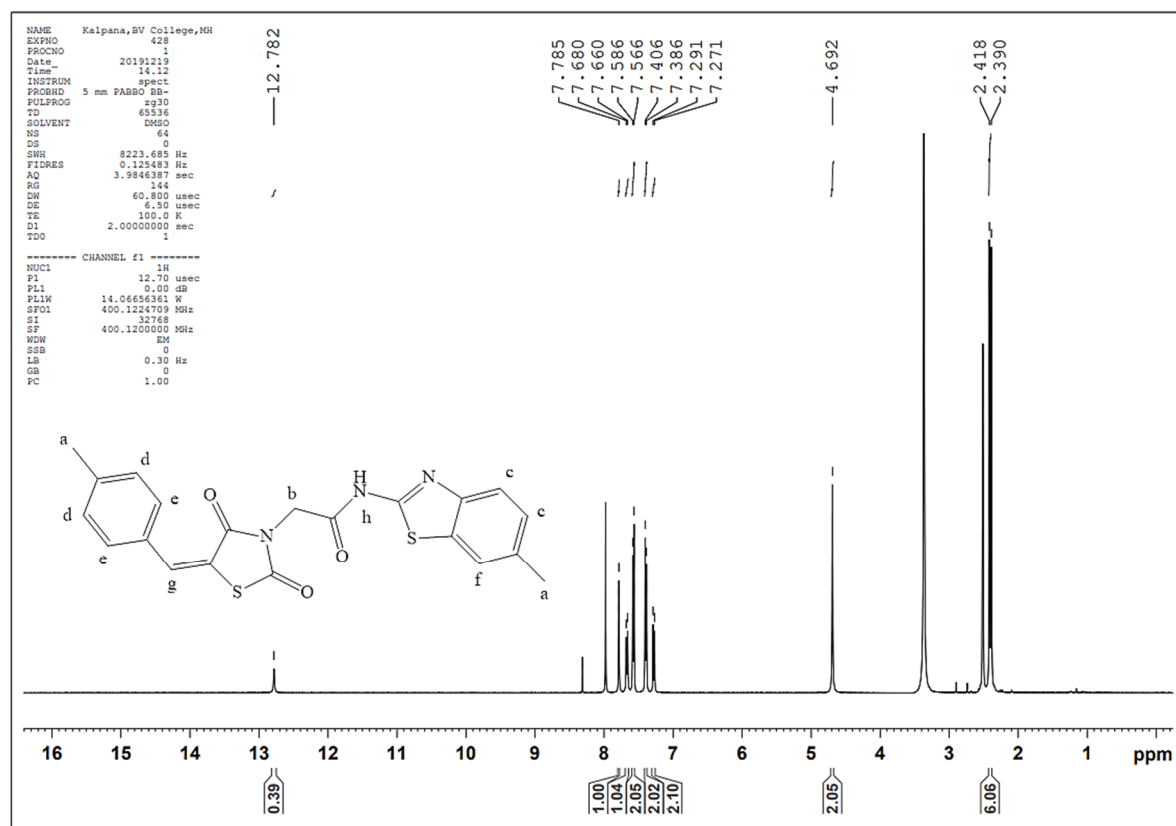

### 3. $^{13}\text{C}$ -NMR

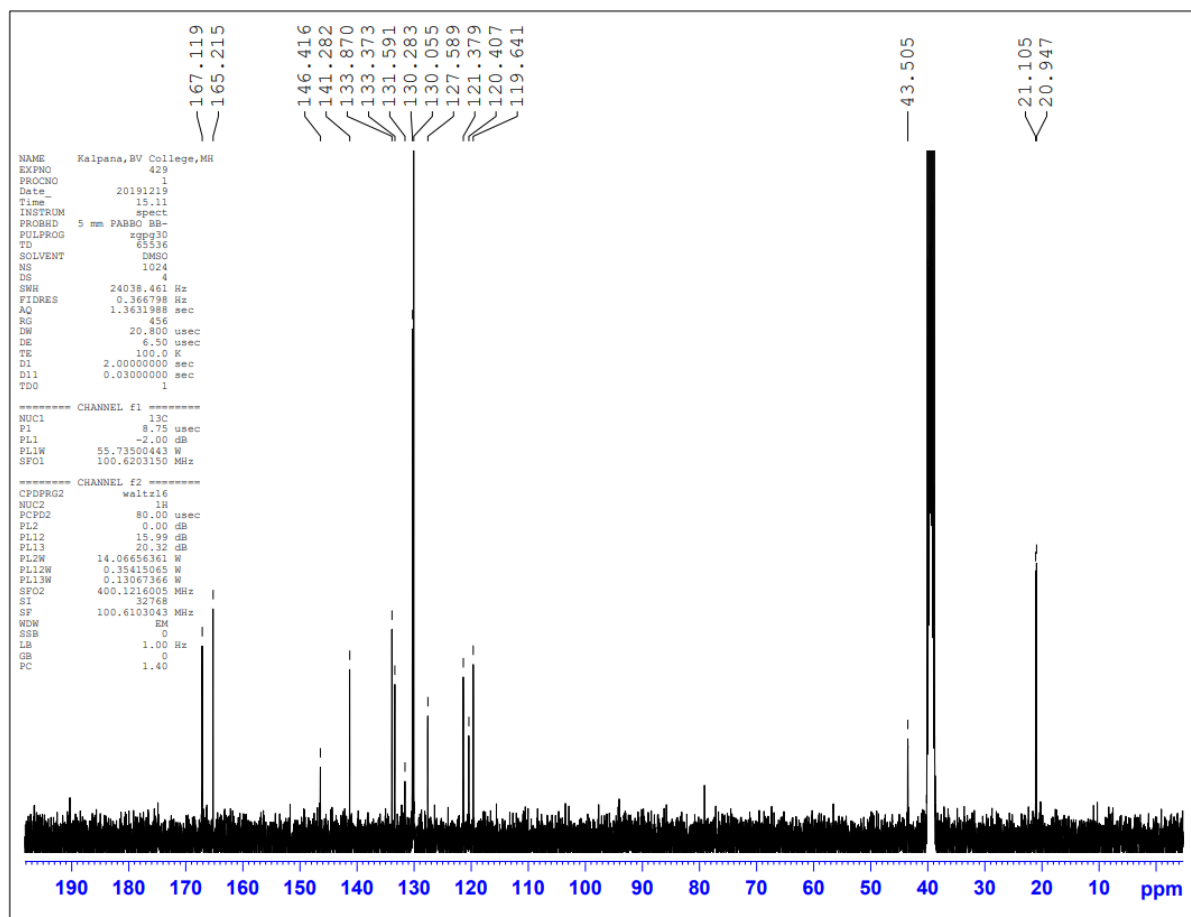

#### 4. HPLC Analysis

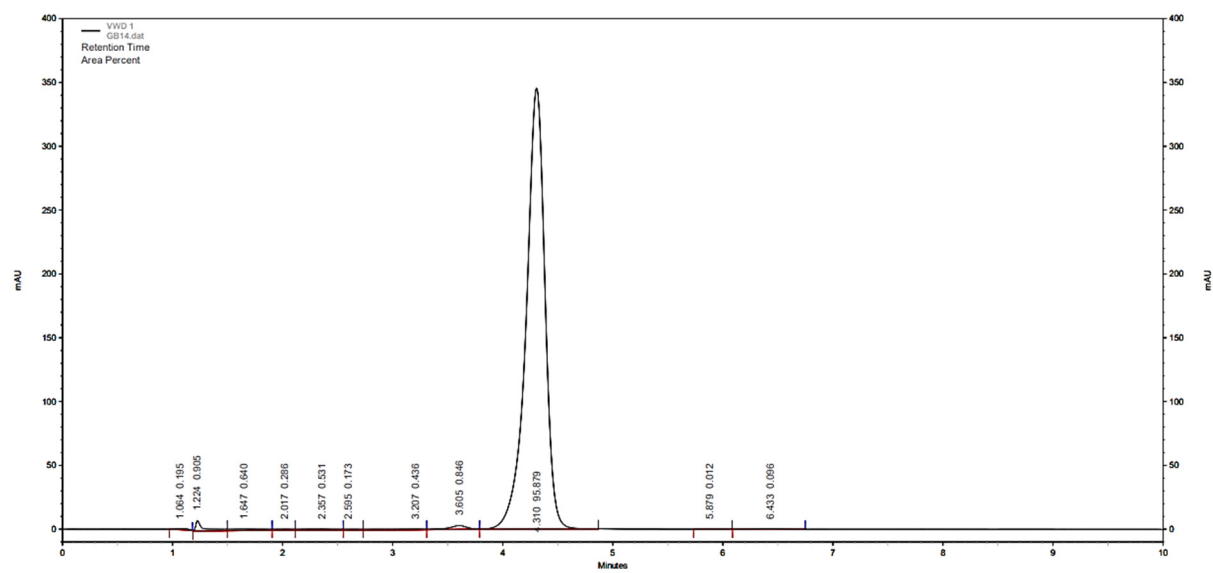

## 5. Mass Spectrometry



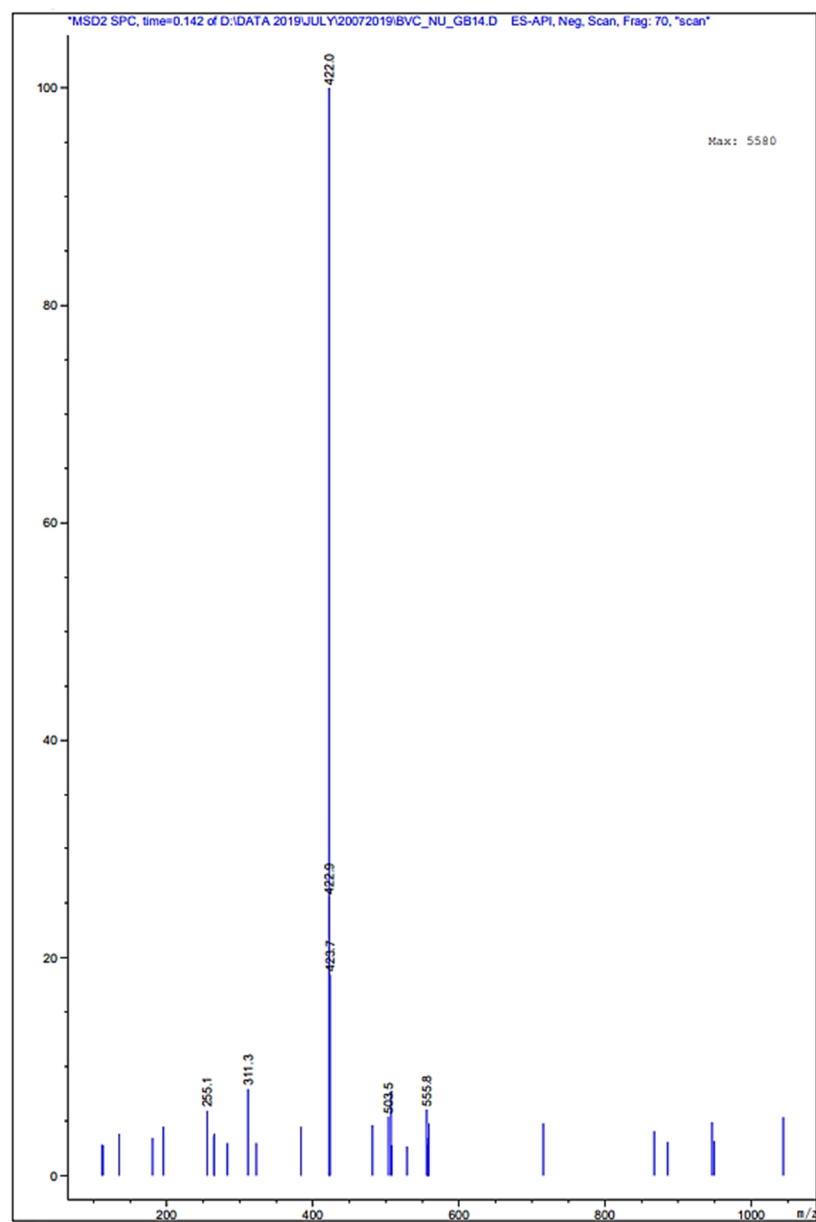

## 6. UV

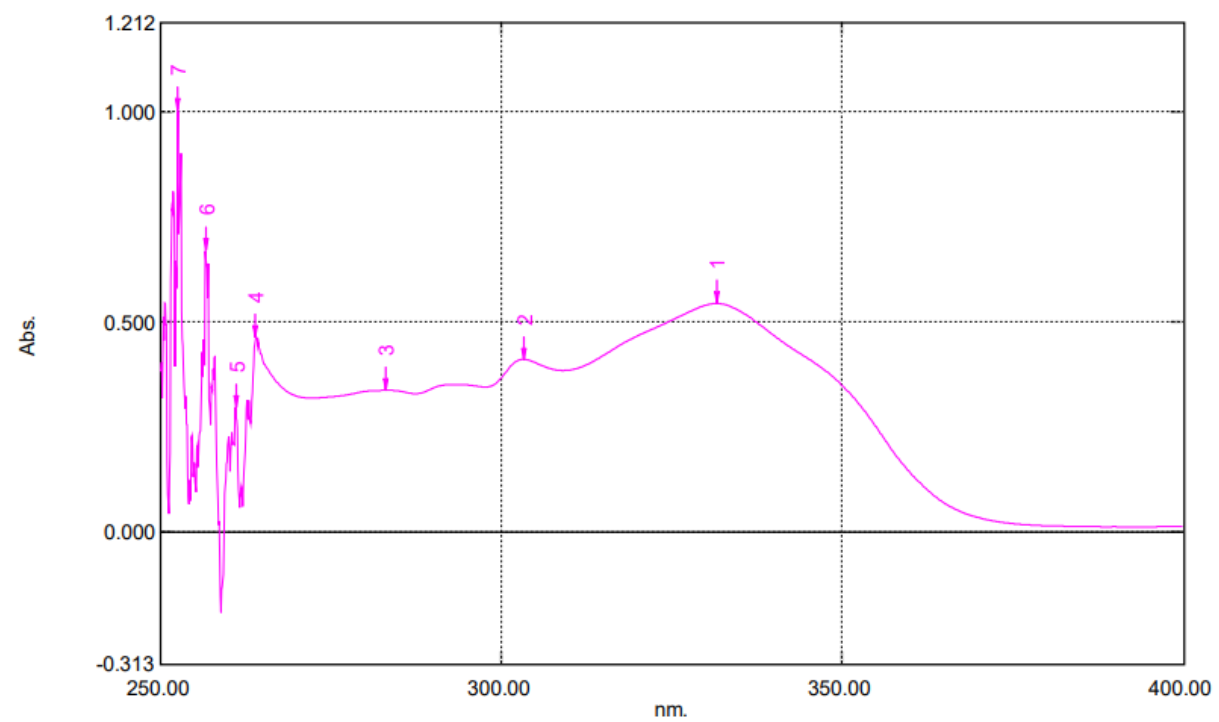

**2-(5-(3,4-dimethylbenzylidene)-2,4-dioxothiazolidin-3-yl)-N-(6-methylbenzo[d]thiazol-2-yl)acetamide (GB15)**

**1. FTIR –**

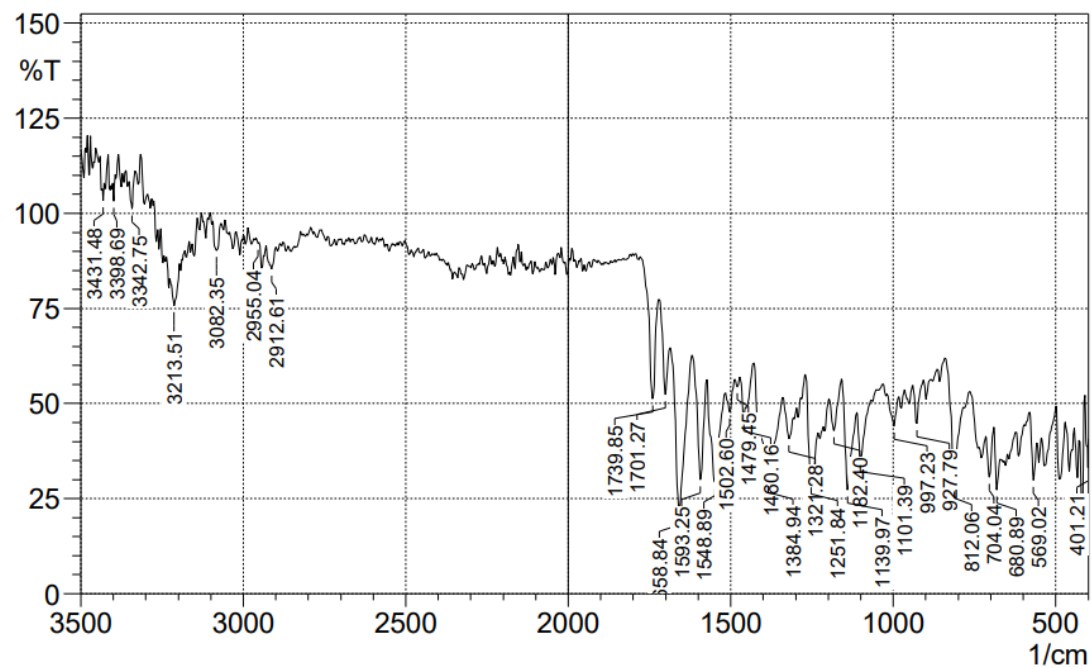

**2. <sup>1</sup>H-NMR**

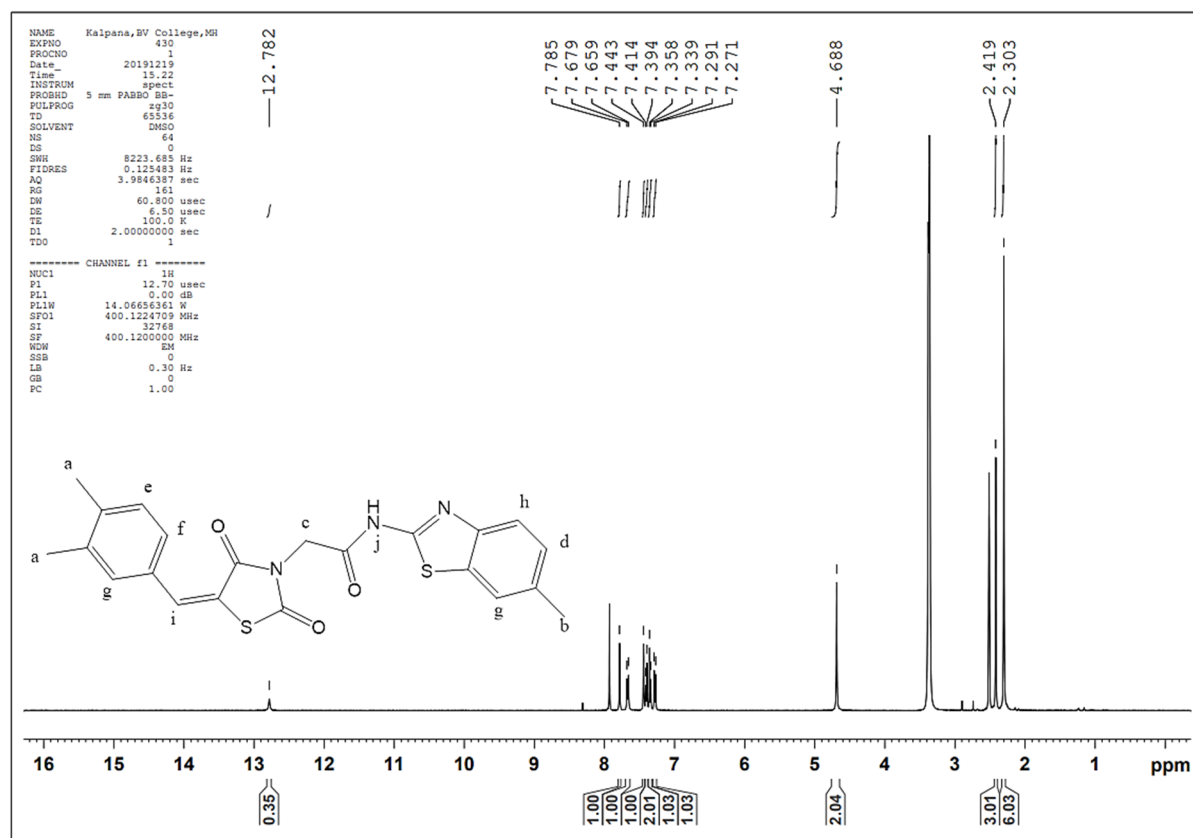

### 3. <sup>13</sup>C-NMR

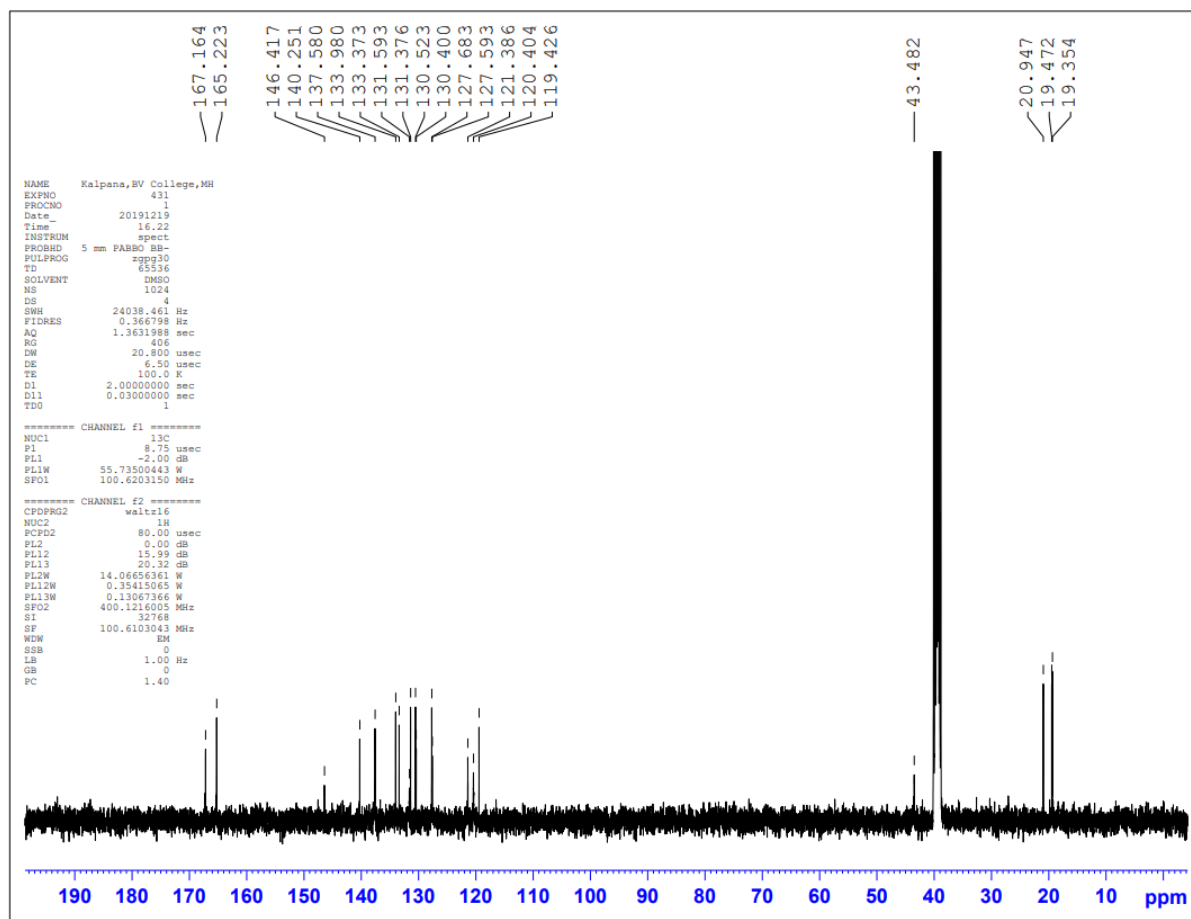

#### 4. HPLC Analysis

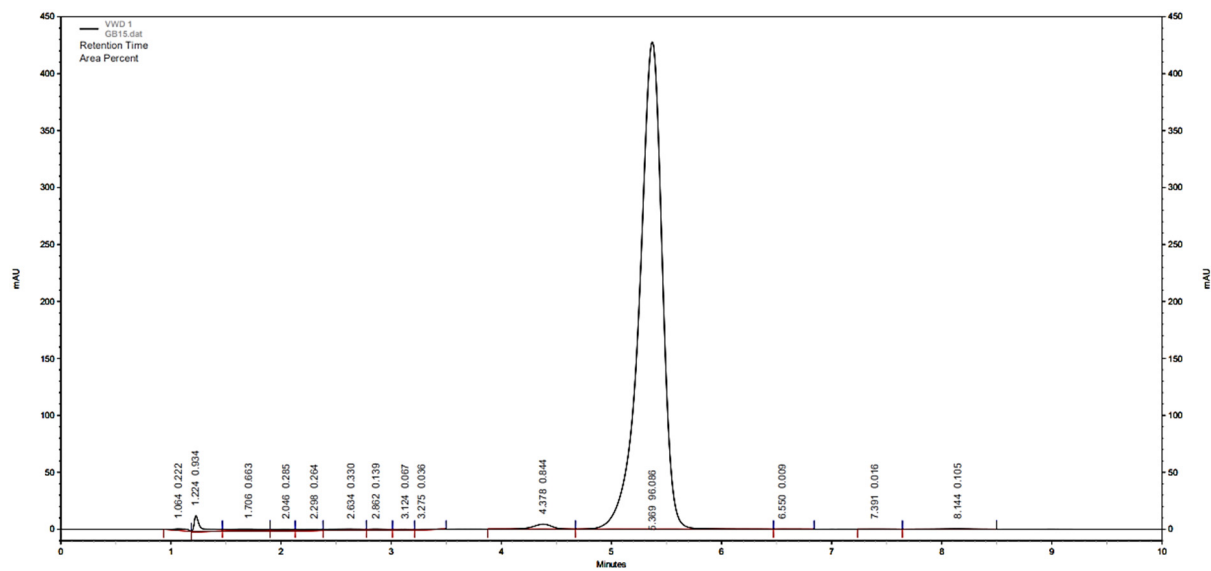

## 5. Mass Spectrometry

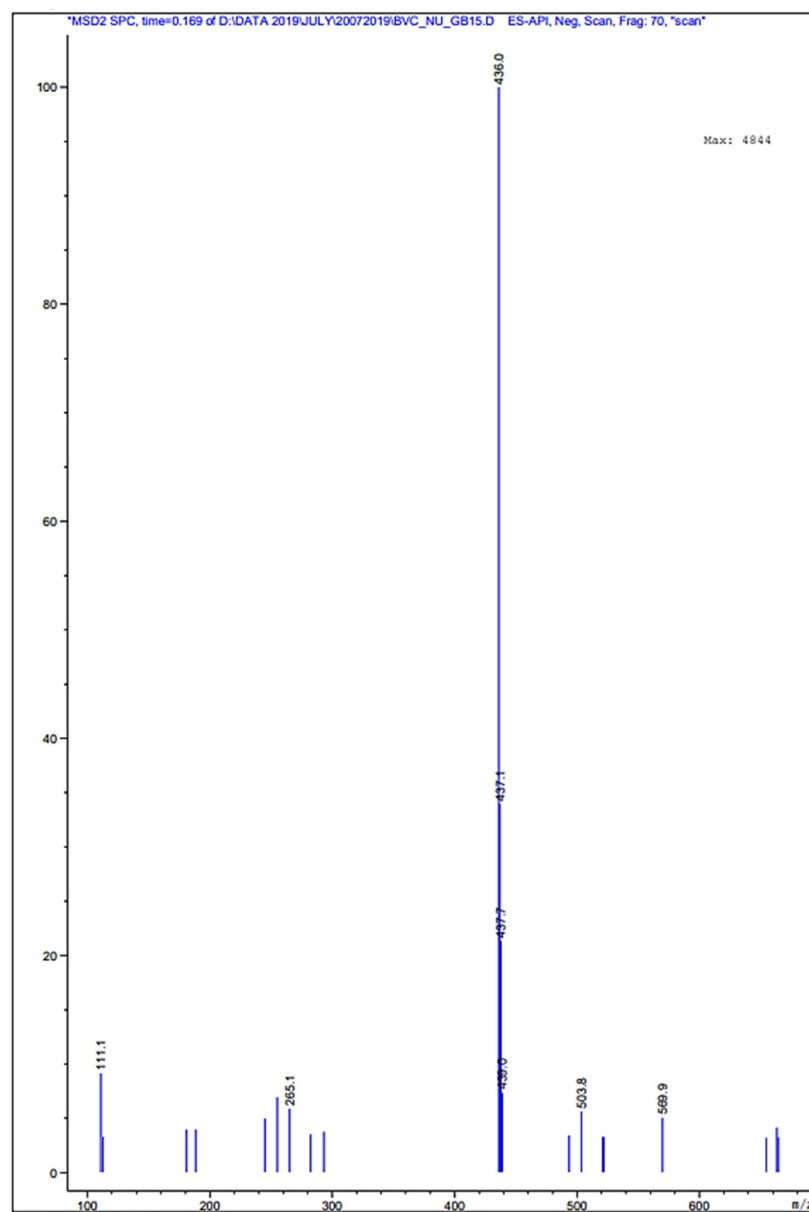

## 6. UV

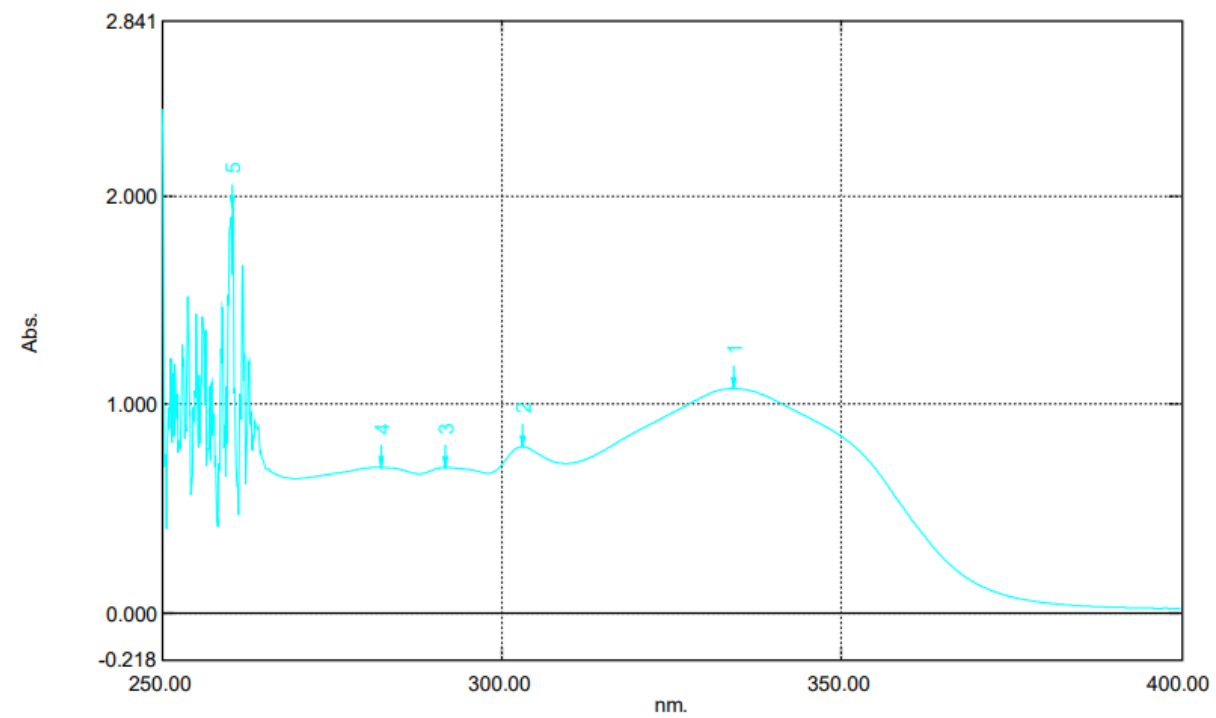



**2-(5-(4-chlorobenzylidene)-2,4-dioxothiazolidin-3-yl)-N-(6-methylbenzo[d]thiazol-2-yl)acetamide (GB16)**

**1. FTIR –**

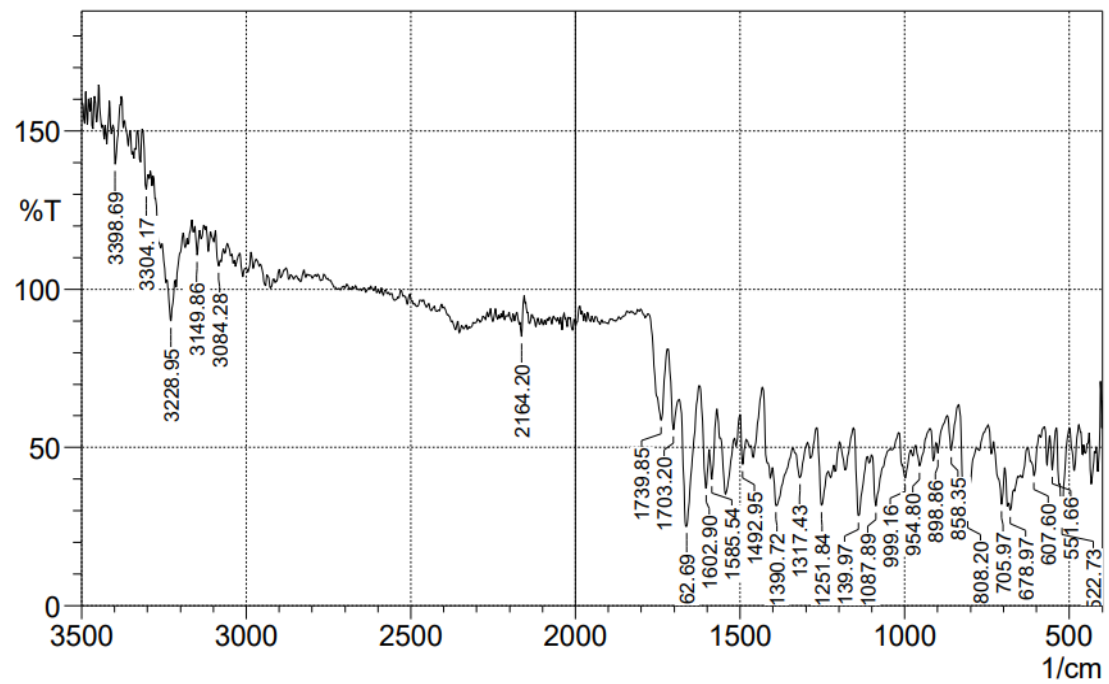

**2. <sup>1</sup>H-NMR**

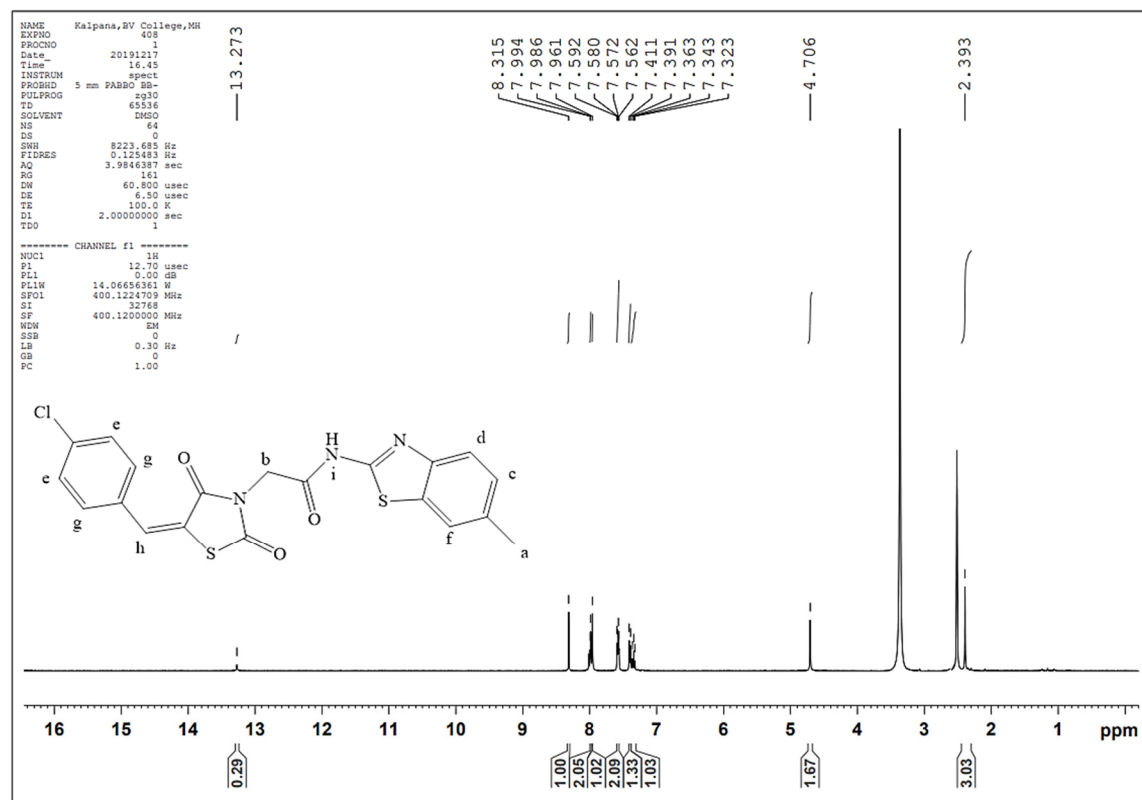

### 3. <sup>13</sup>C-NMR

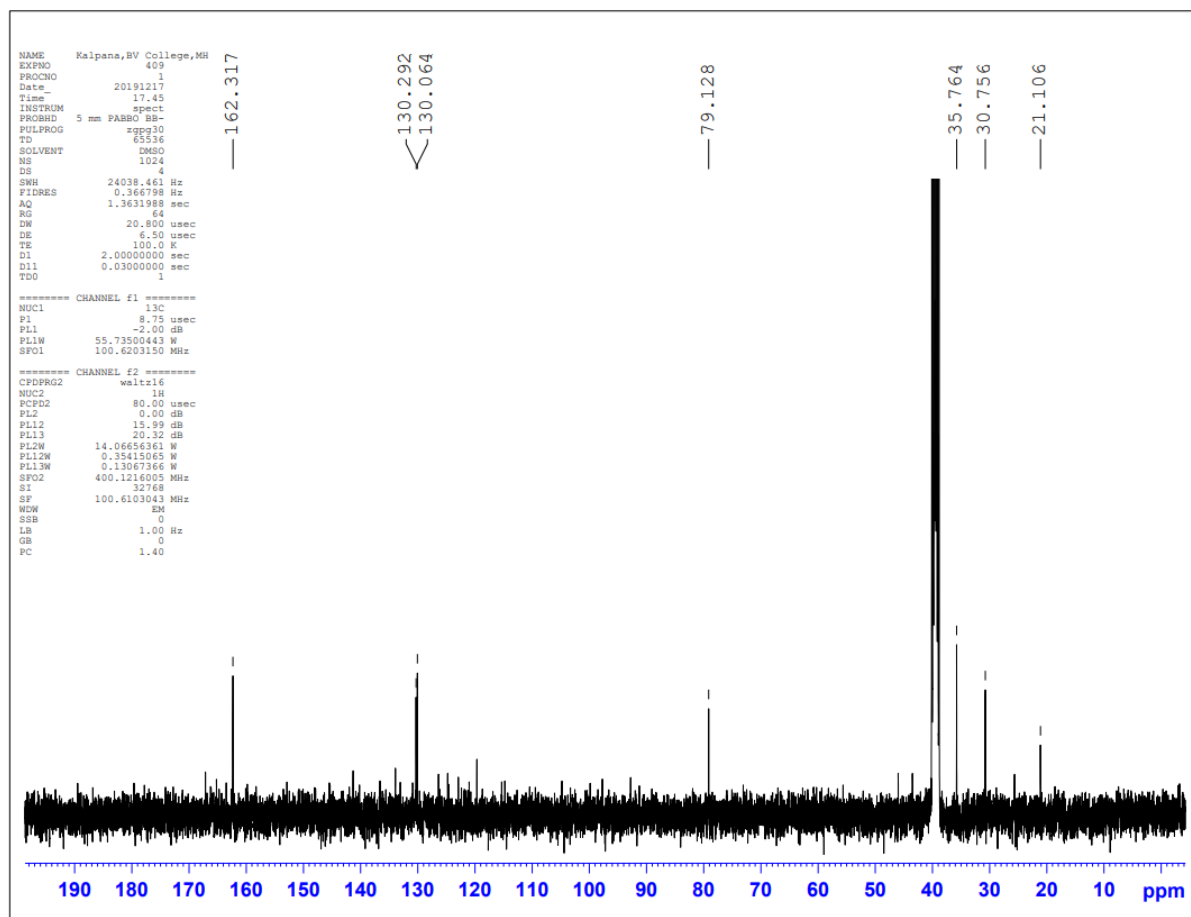

#### 4. HPLC Analysis

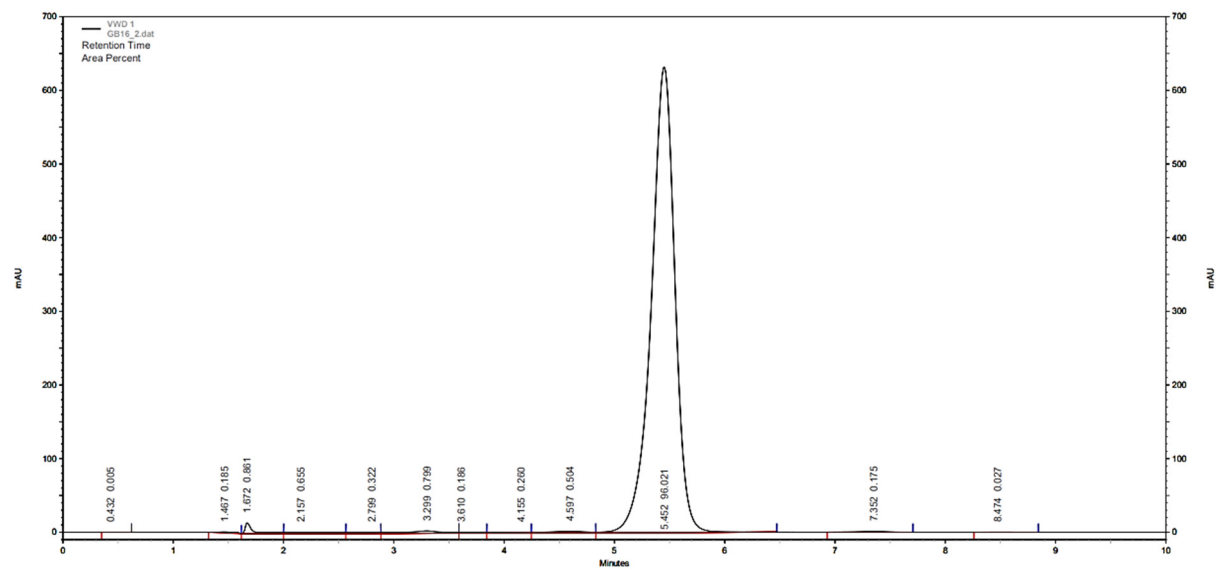

## 5. Mass Spectrometry

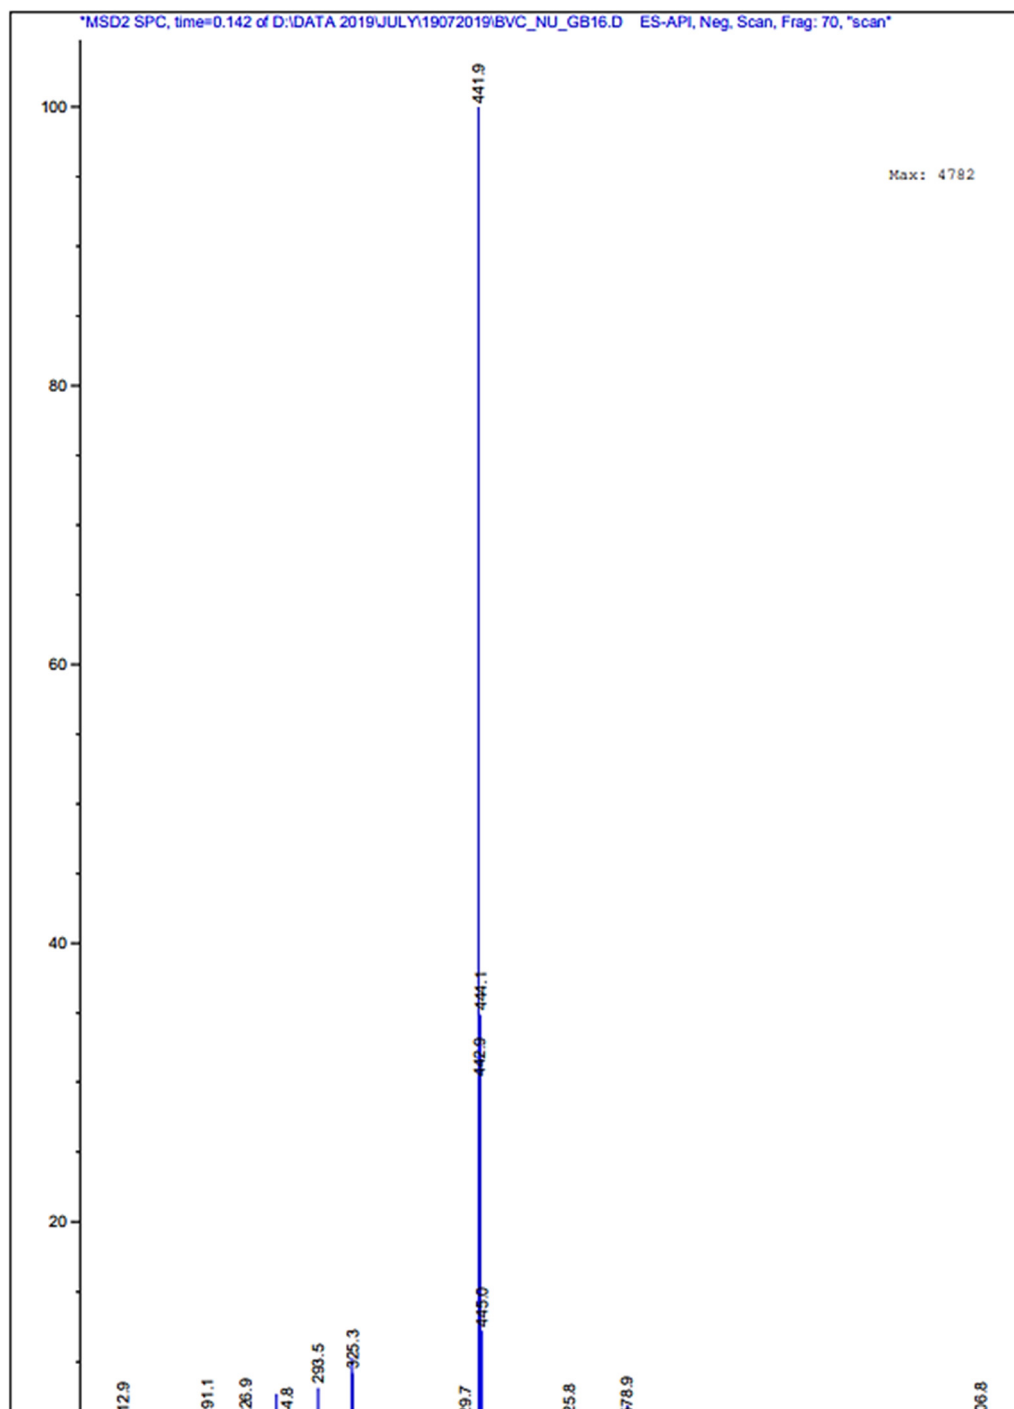

## 6. UV

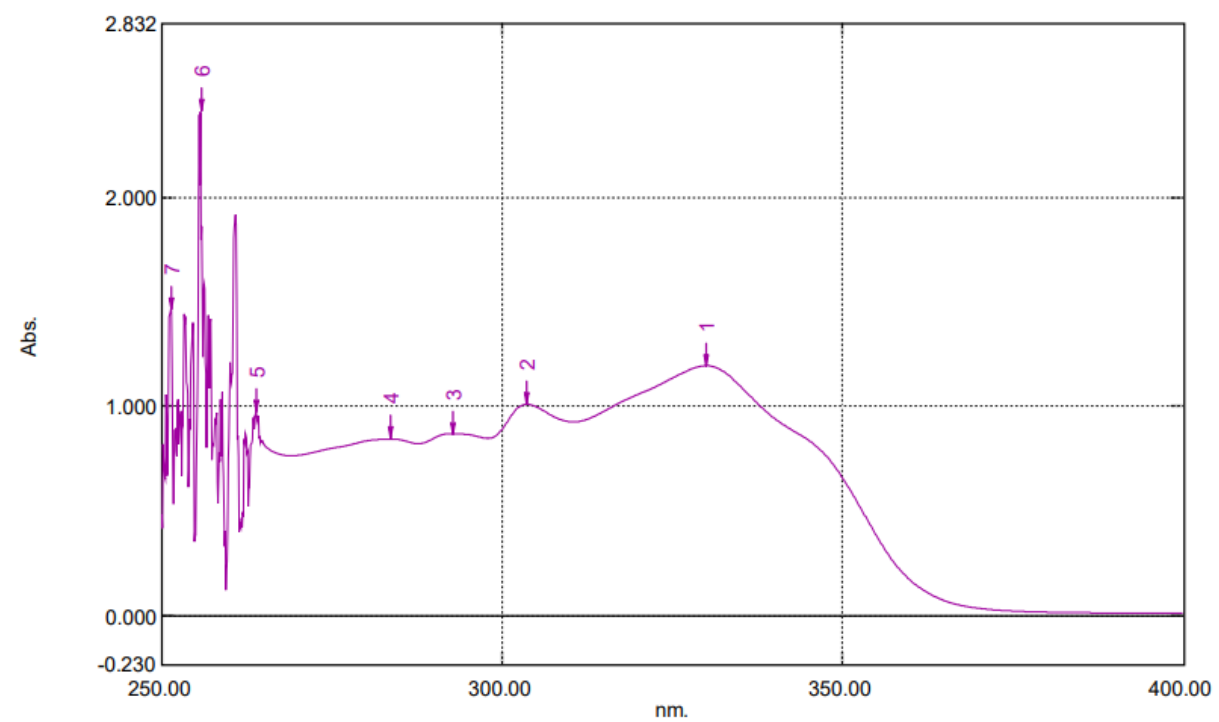

**2-(5-(4-chlorobenzylidene)-2,4-dioxothiazolidin-3-yl)-N-(6-ethoxybenzo[d]thiazol-2-yl)acetamide (GB17)**

**1. FTIR –**

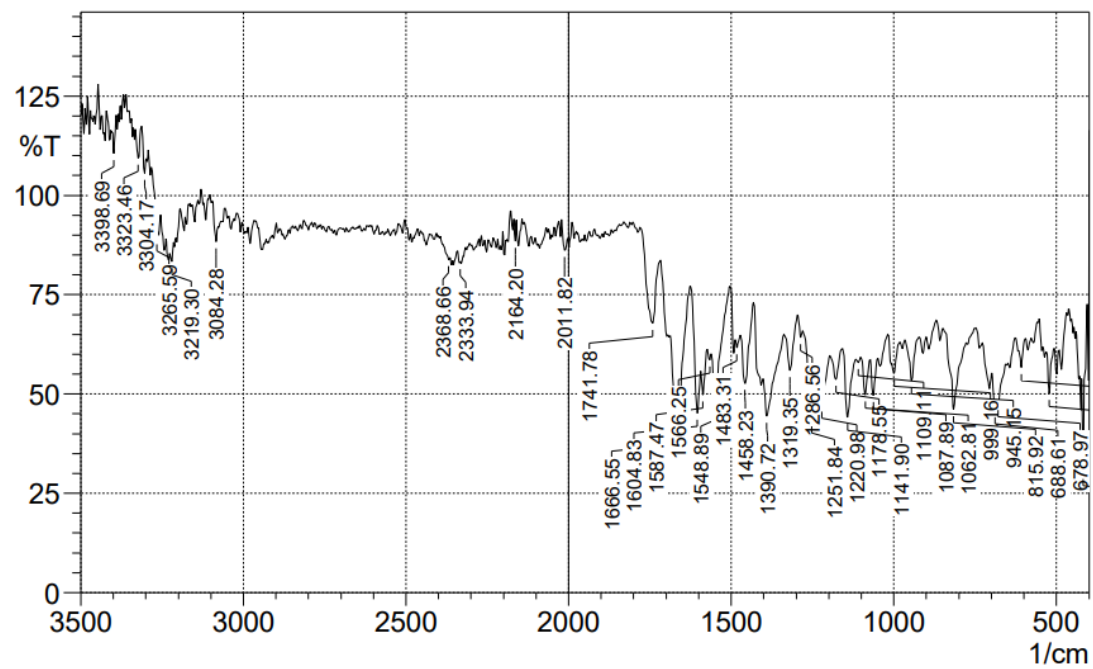

**2. <sup>1</sup>H-NMR**

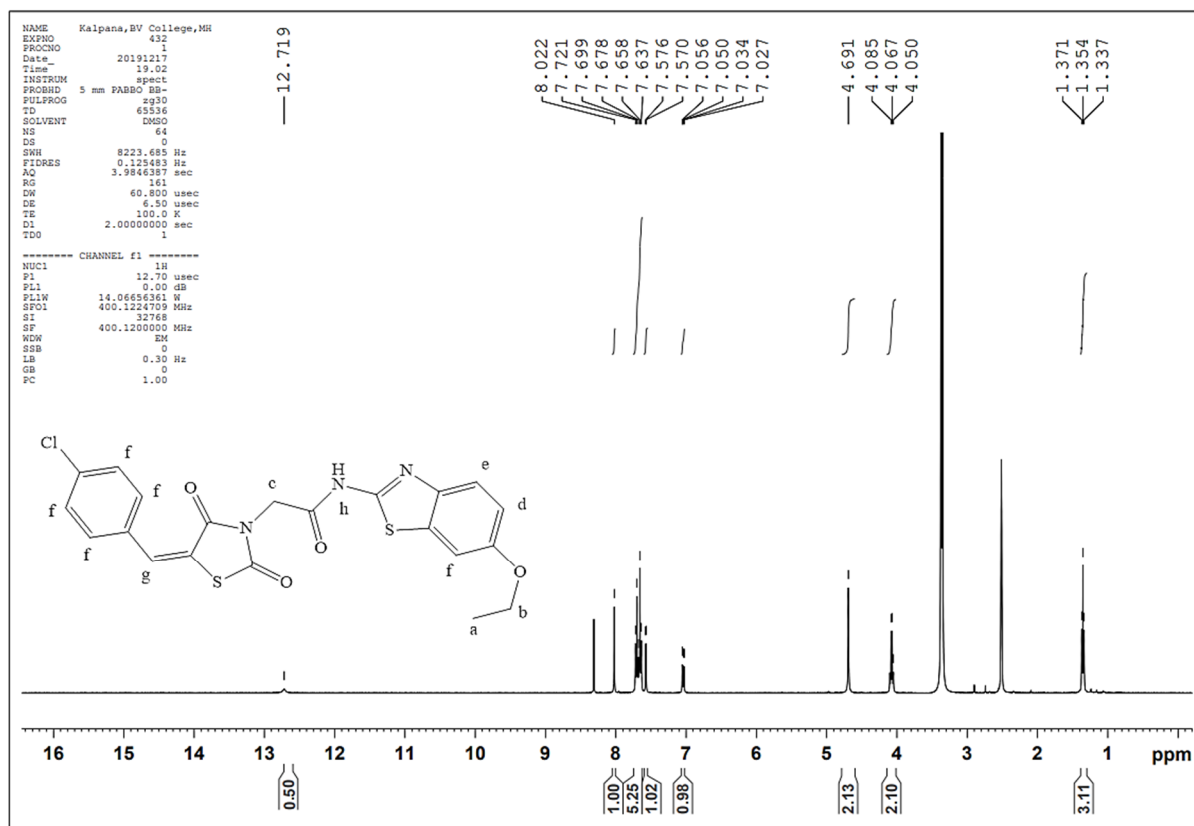

### 3. <sup>13</sup>C-NMR



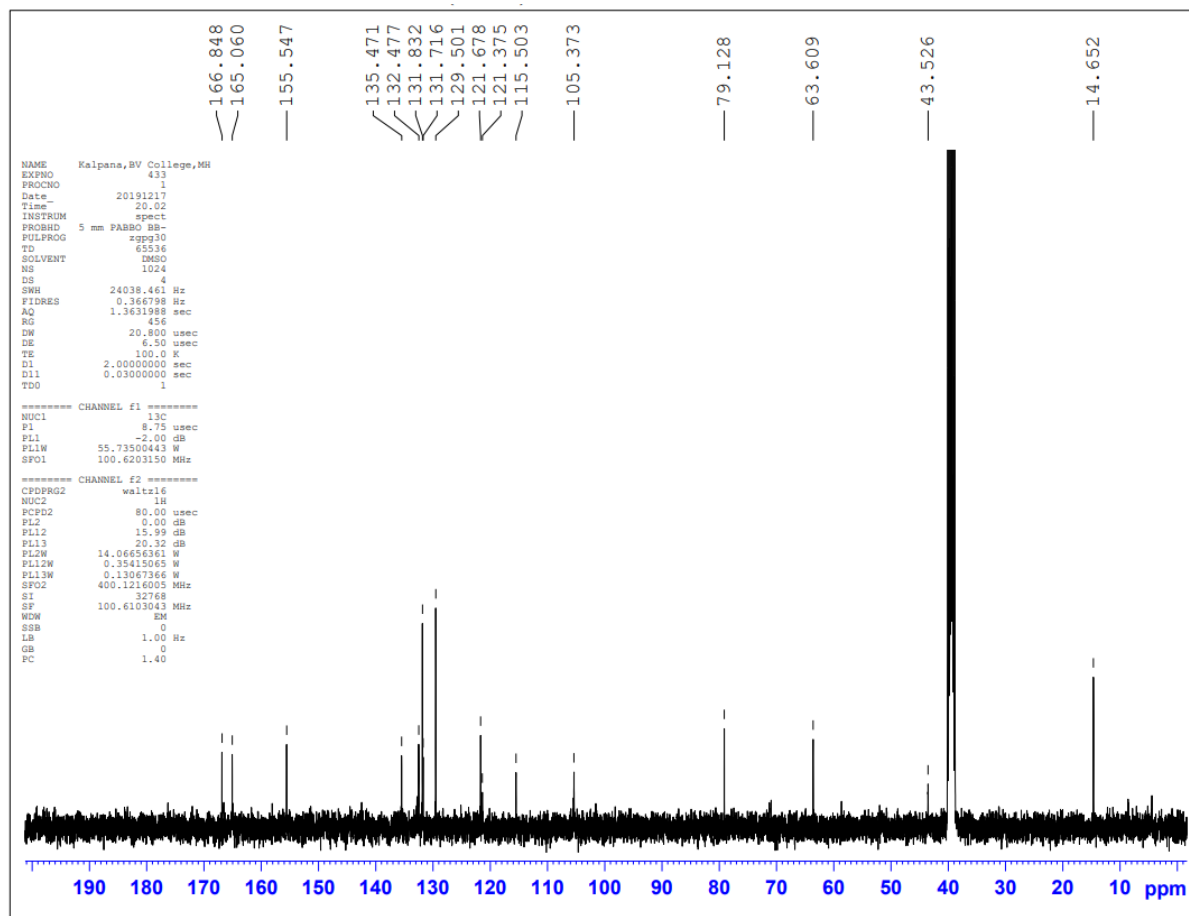

#### 4. HPLC Analysis

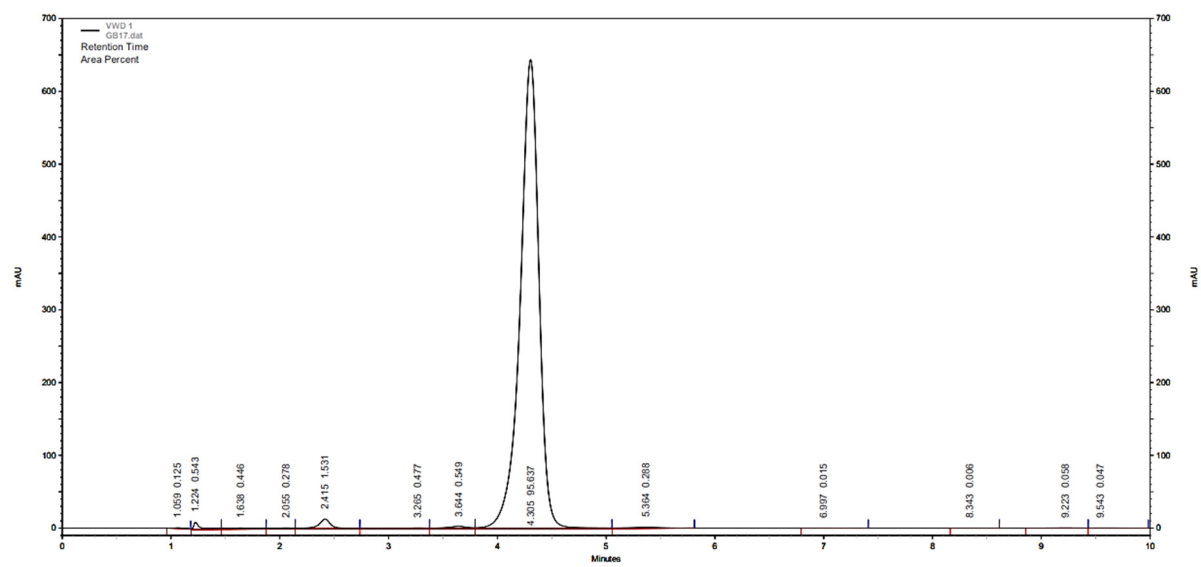

## 5. Mass Spectrometry

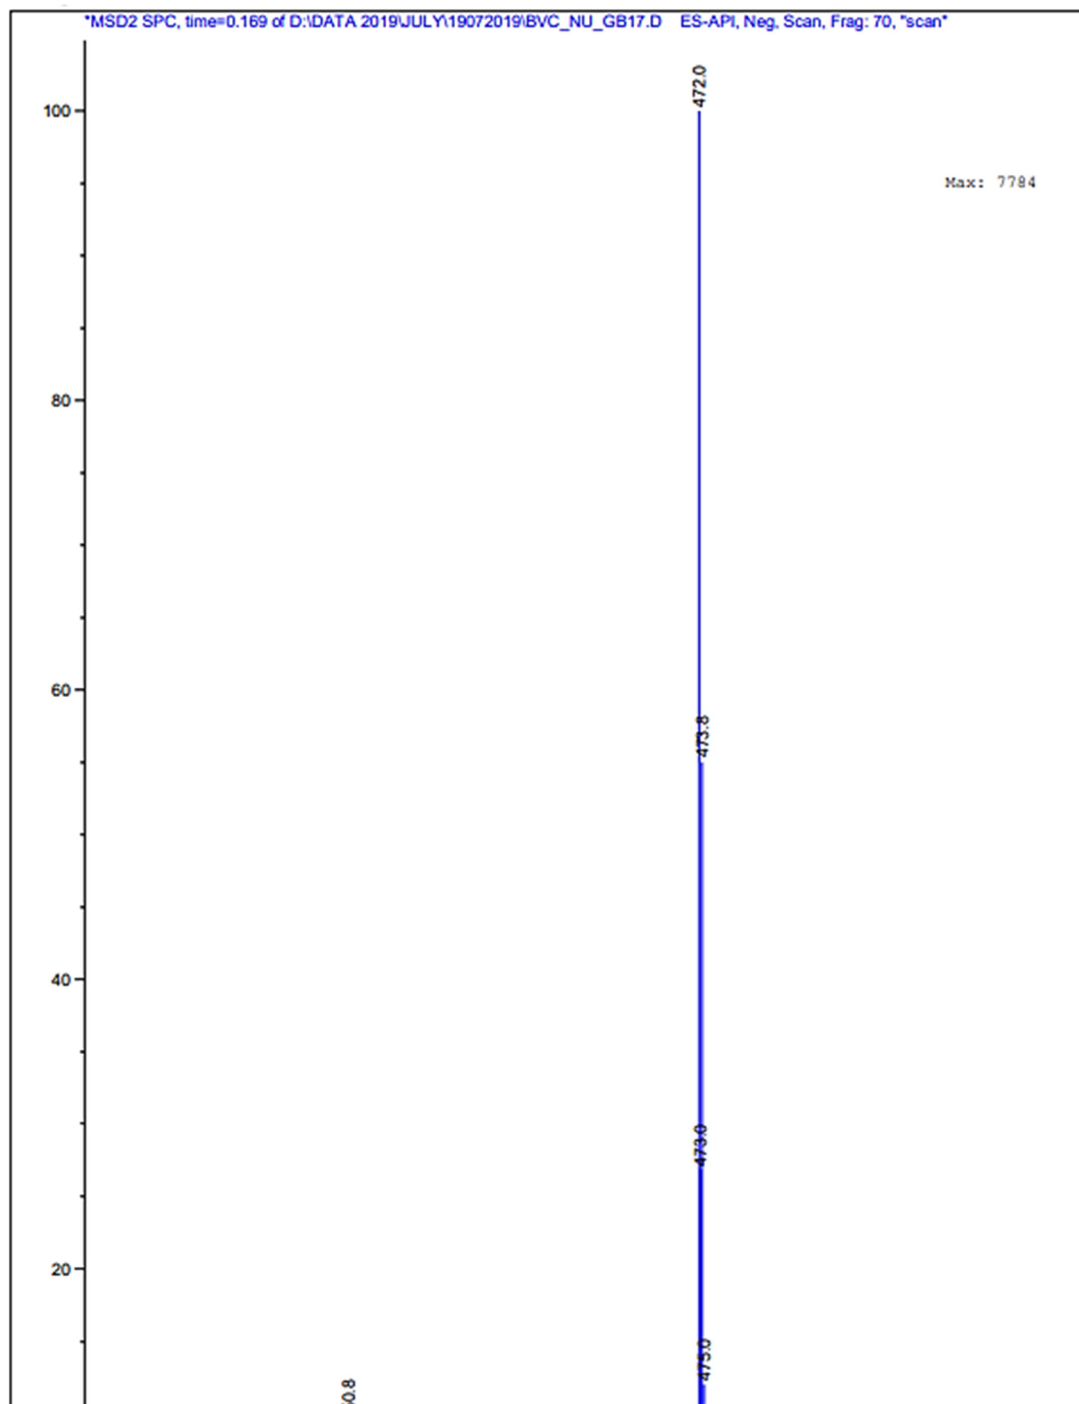

## 6. UV

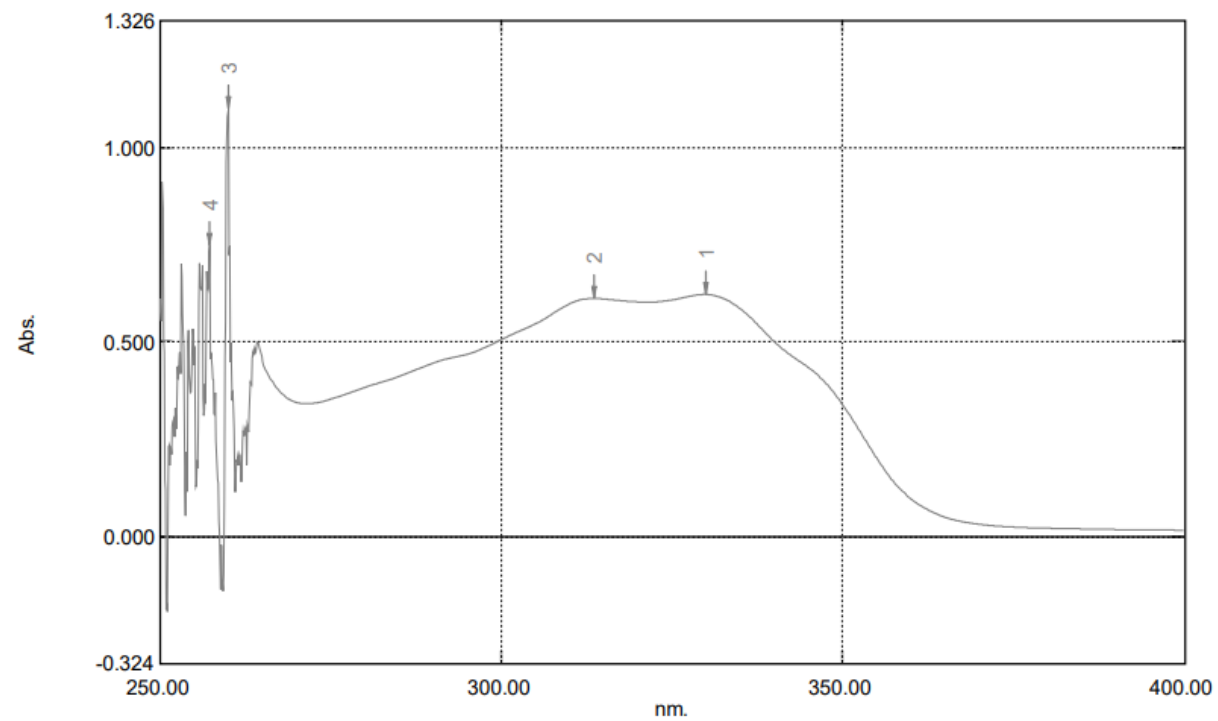

**N-(4,6-difluorobenzo[d]thiazol-2-yl)-2-(5-(4-fluorobenzylidene)-2,4-dioxothiazolidin-3-yl)acetamide (GB18)**

**1. FTIR**

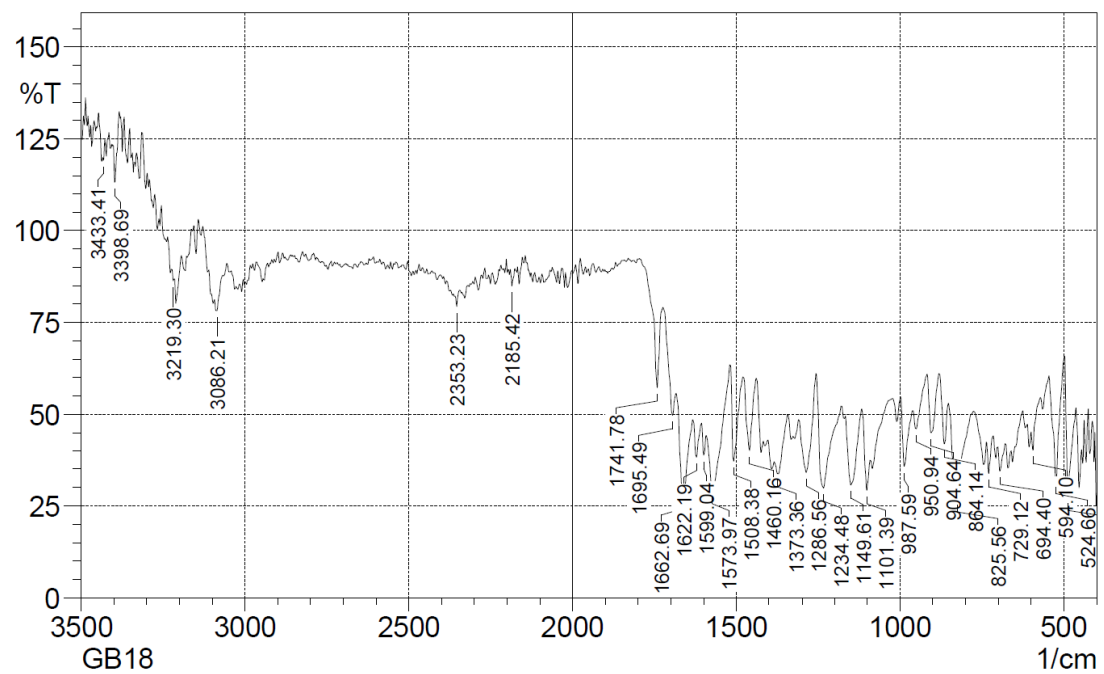

**2. 1H-NMR**

SAIFNM190323A-31(GB18)

SAIF Cochin

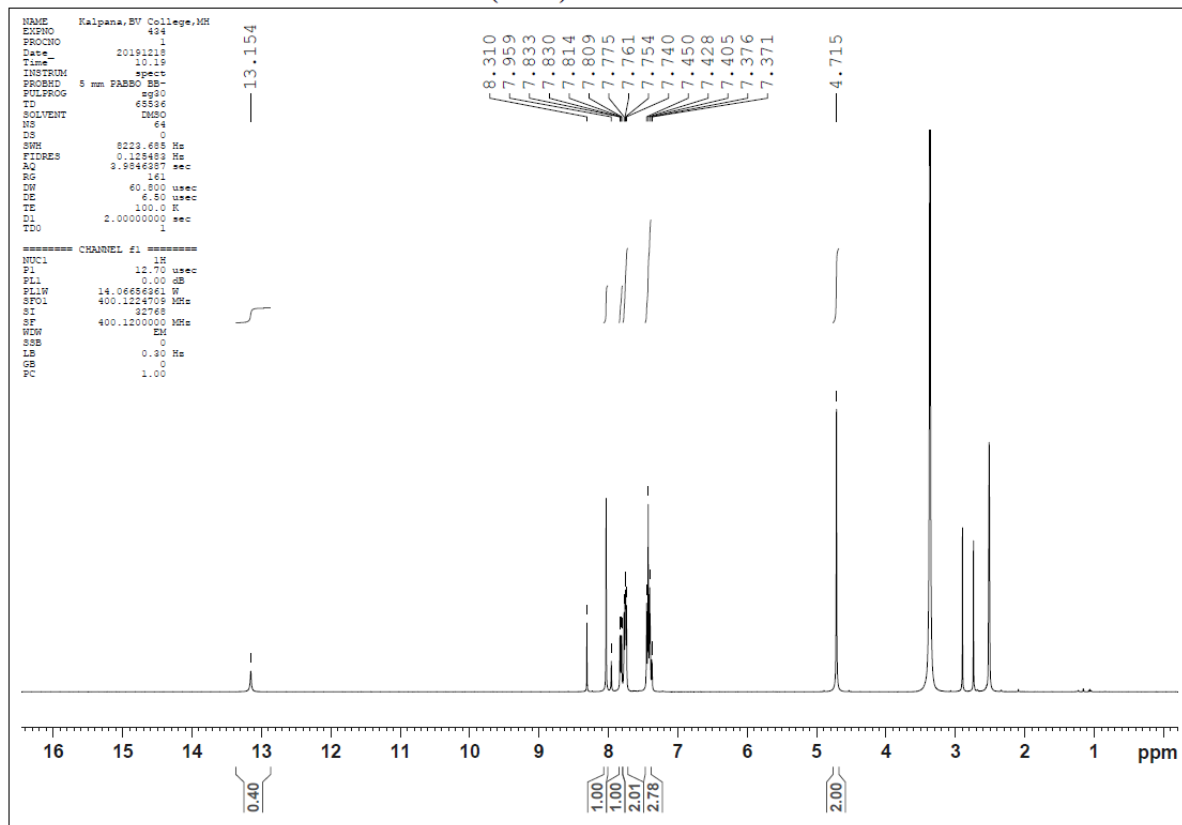

### 3. 13C-NMR

SAIFNM190323A-32(GB18)

SAIF Cochin

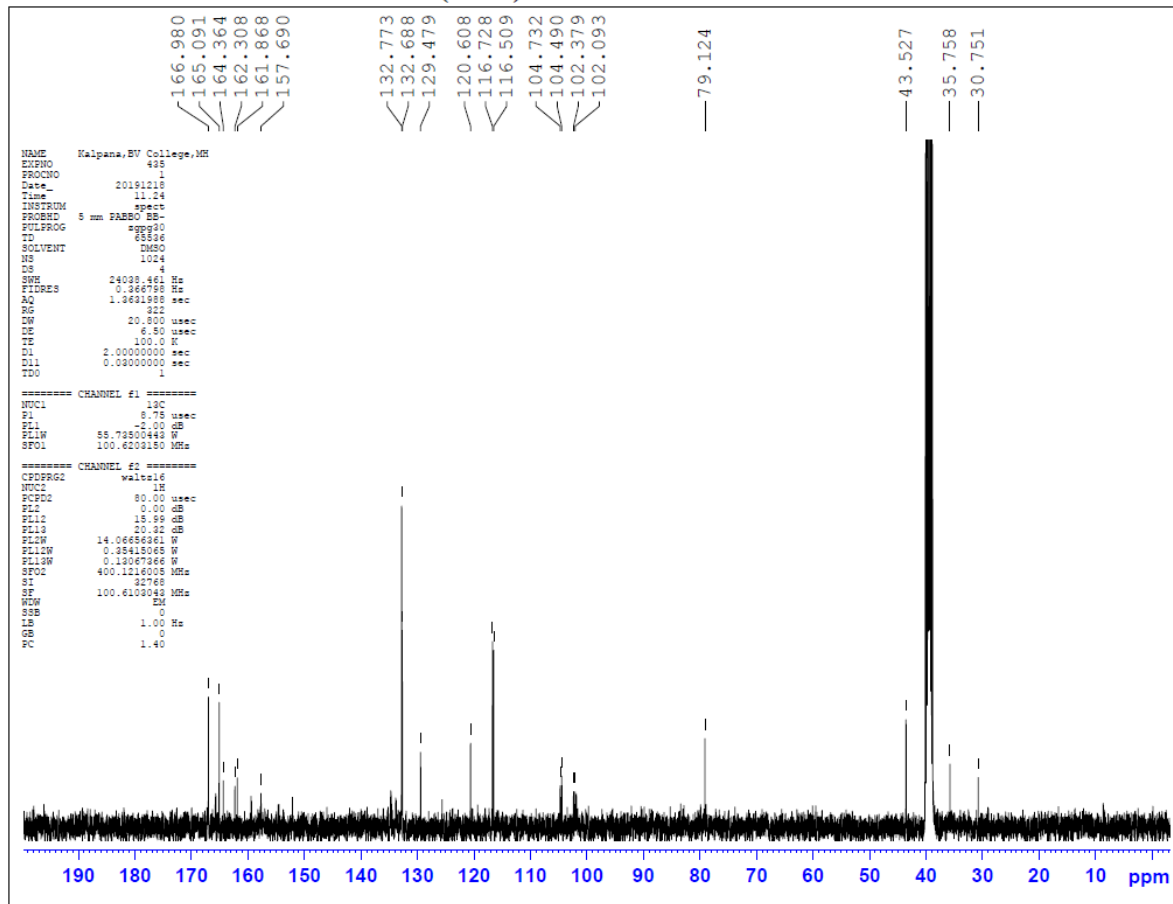

#### 4. HPLC

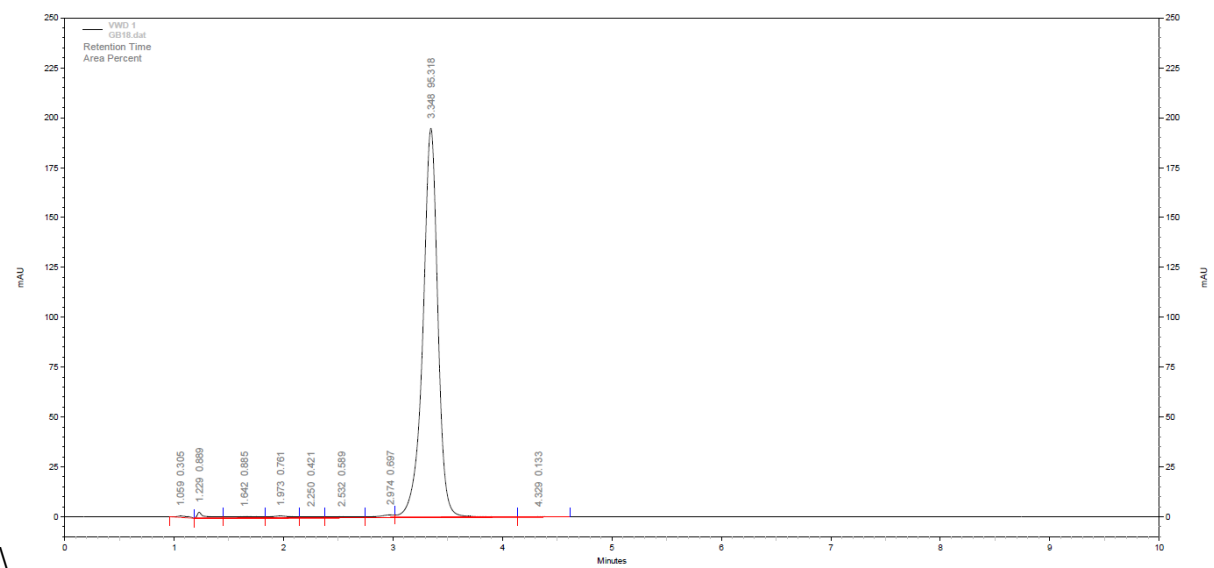

## 5. Mass



MS Spectrum

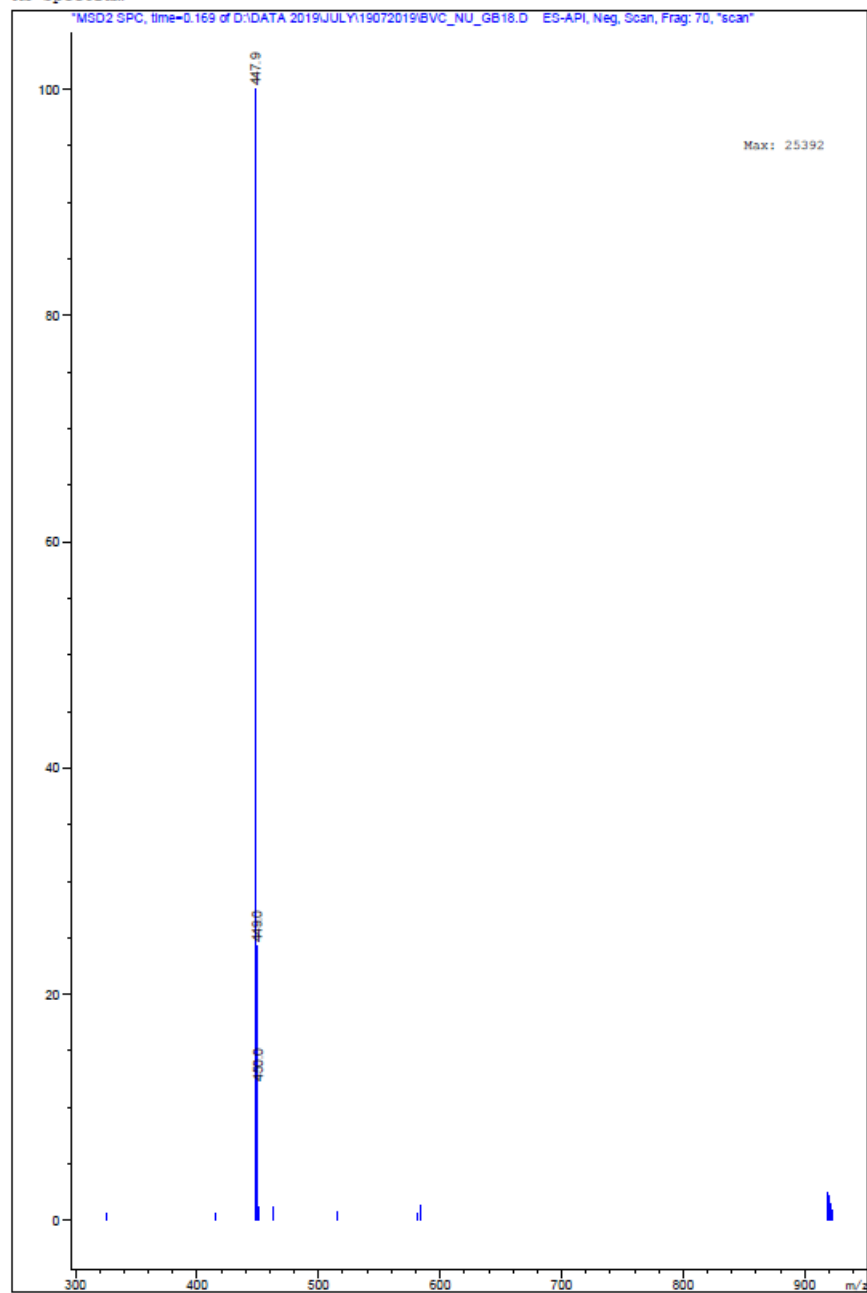

**N-(4,6-difluorobenzo[d]thiazol-2-yl)-2-(5-(4-methylbenzylidene)-2,4-dioxothiazolidin-3-yl)acetamide (GB19)**

**1. FTIR**

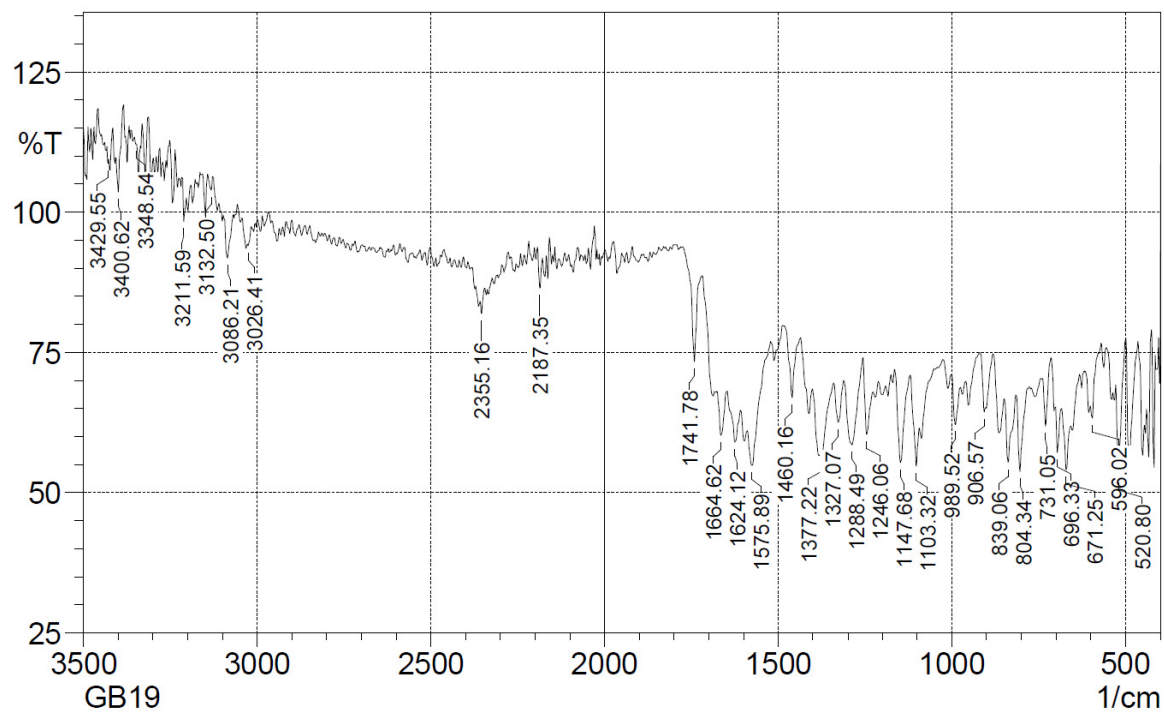

**2. 1H-NMR**

SAIFNM190323A-33(GB19)

SAIF Cochin

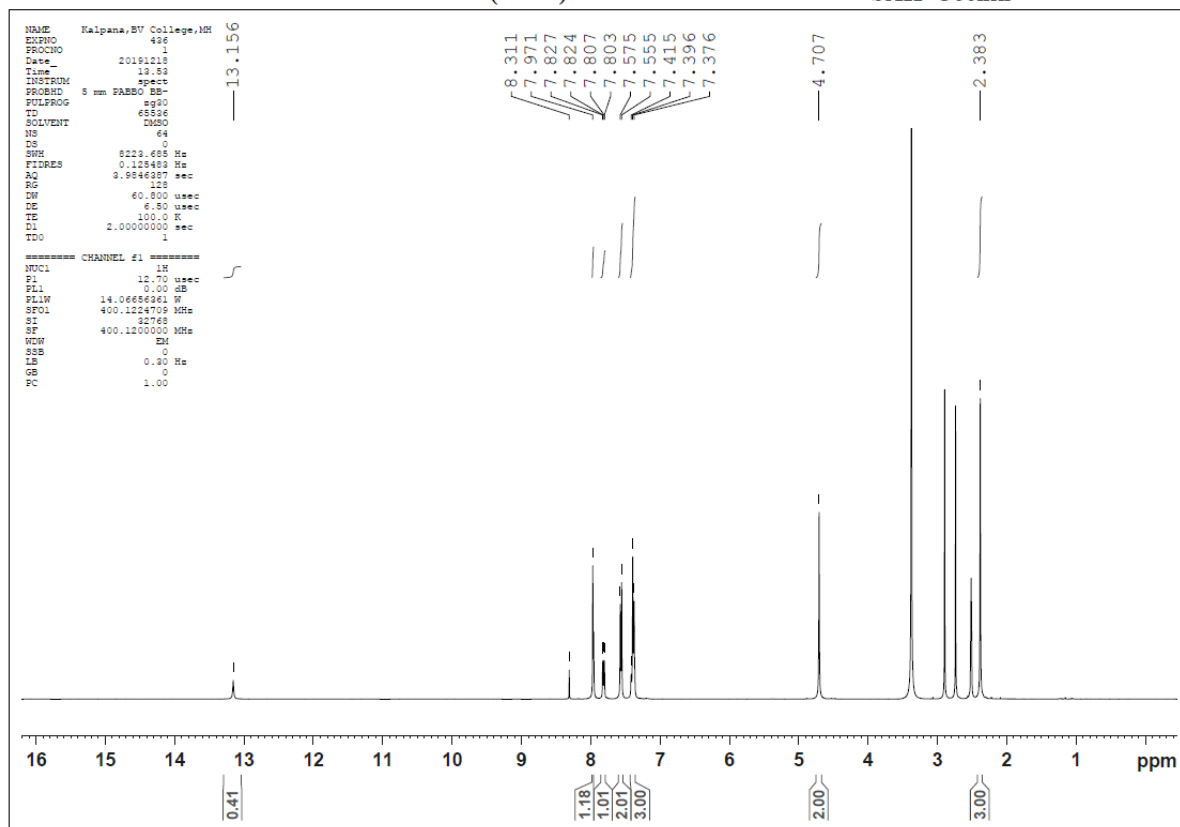

### 3. 13C-NMR

SAIFNM190323A-34(GB19)

SAIF Cochin

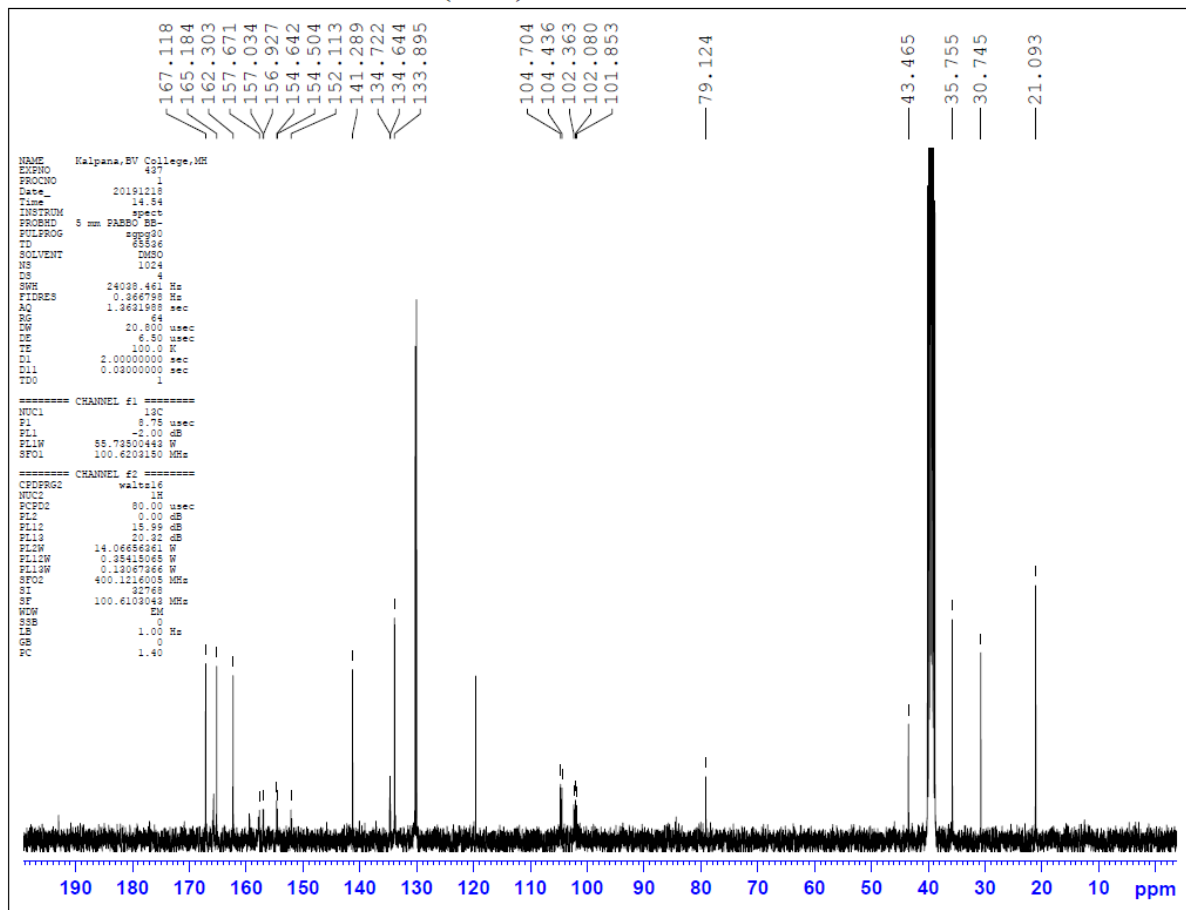

#### 4. HPLC

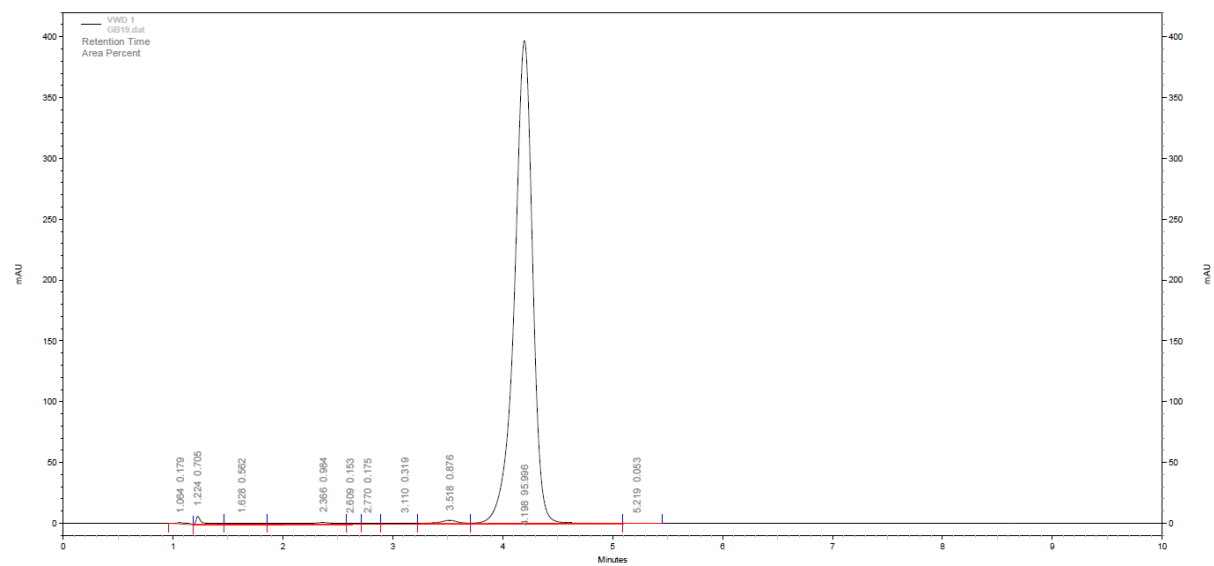

## 5. Mass

MS Spectrum

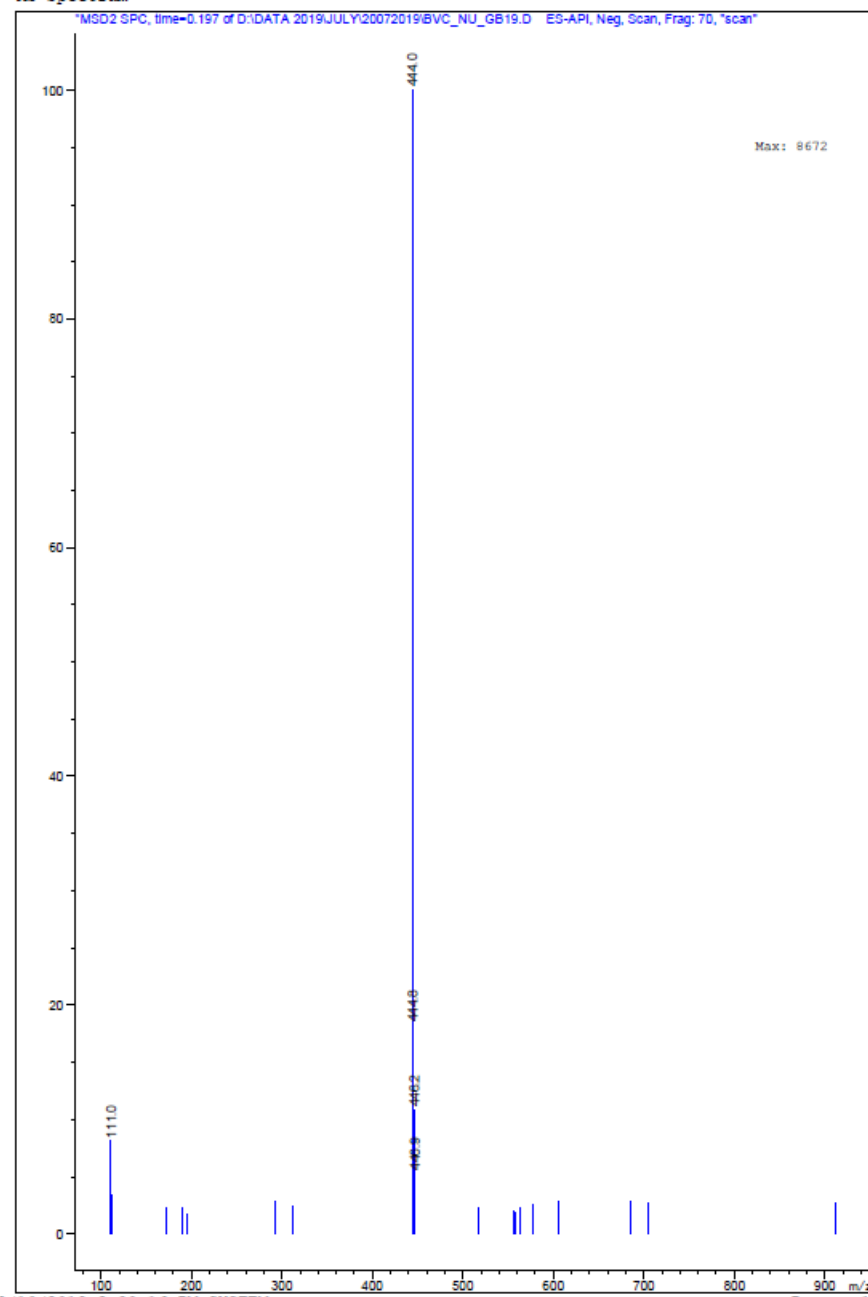

**N-(4,6-difluorobenzo[d]thiazol-2-yl)-2-(5-(3,4-dimethylbenzylidene)-2,4-dioxothiazolidin-3-yl)acetamide (GB20)**

**1. FTIR**

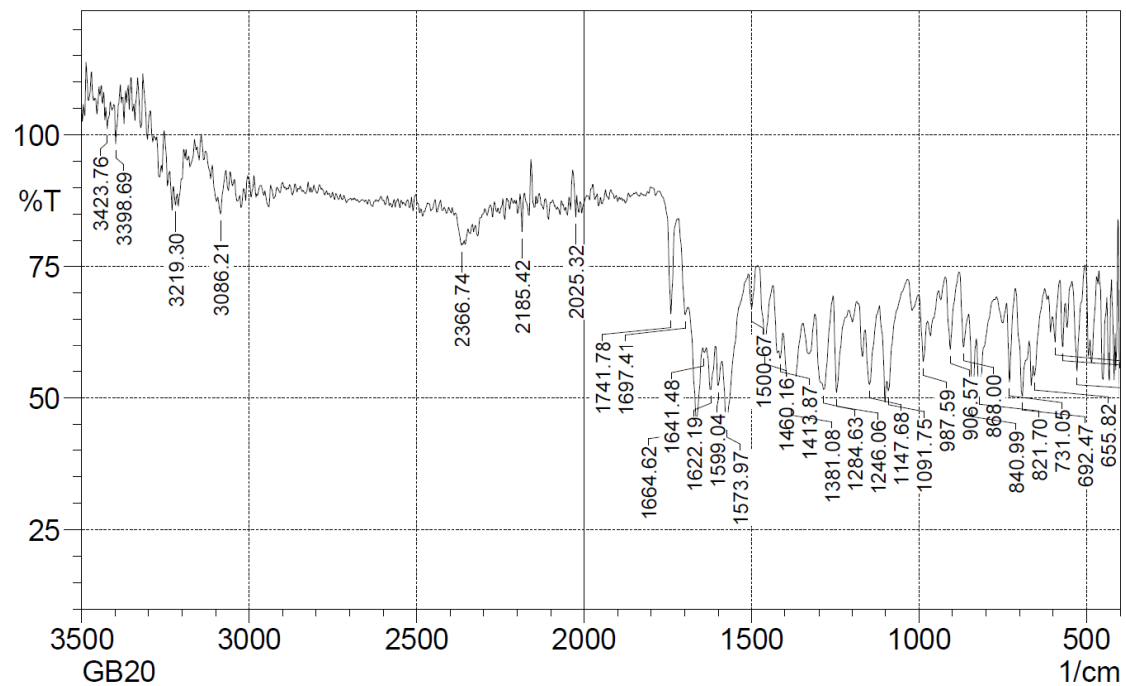

**2. 1H-NMR**

SAIFNM190323A-35(GB20)

SAIF Cochin

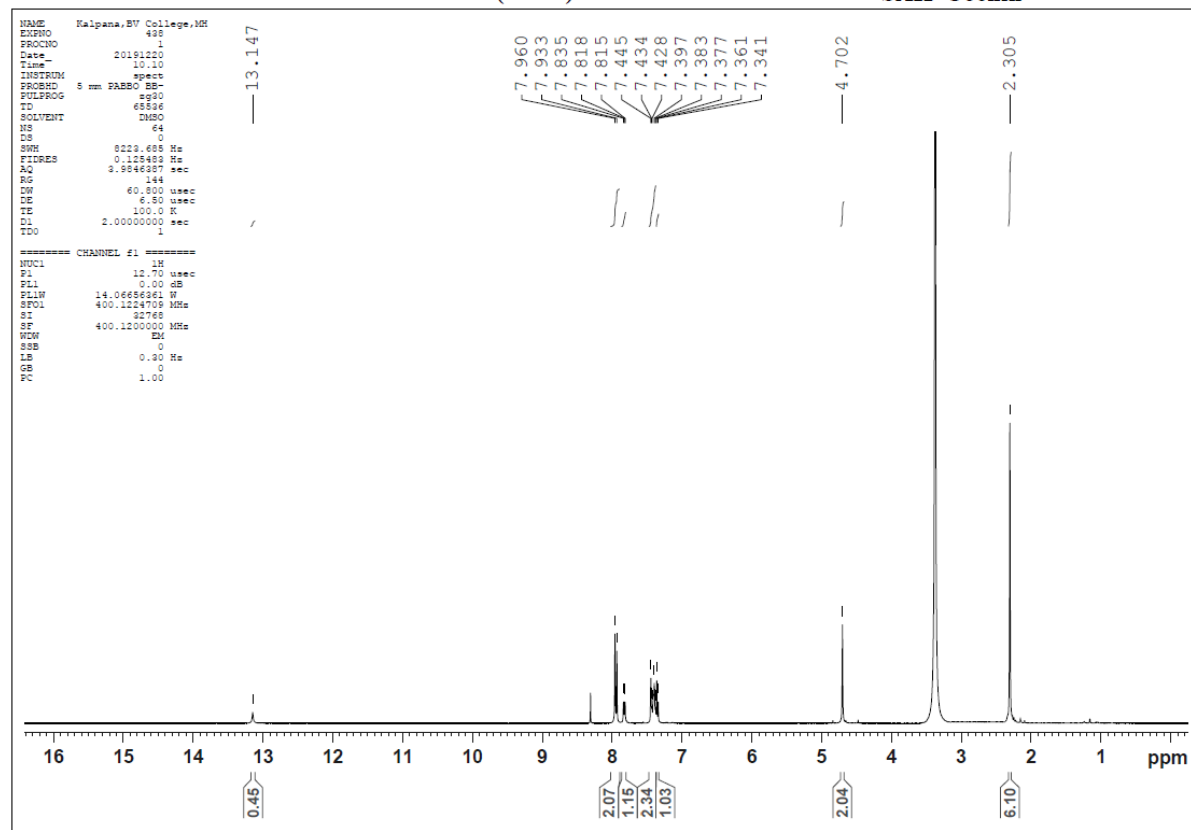

### 3. 13C-NMR



SAIFNM190323A-36(GB20)

SAIF Cochin

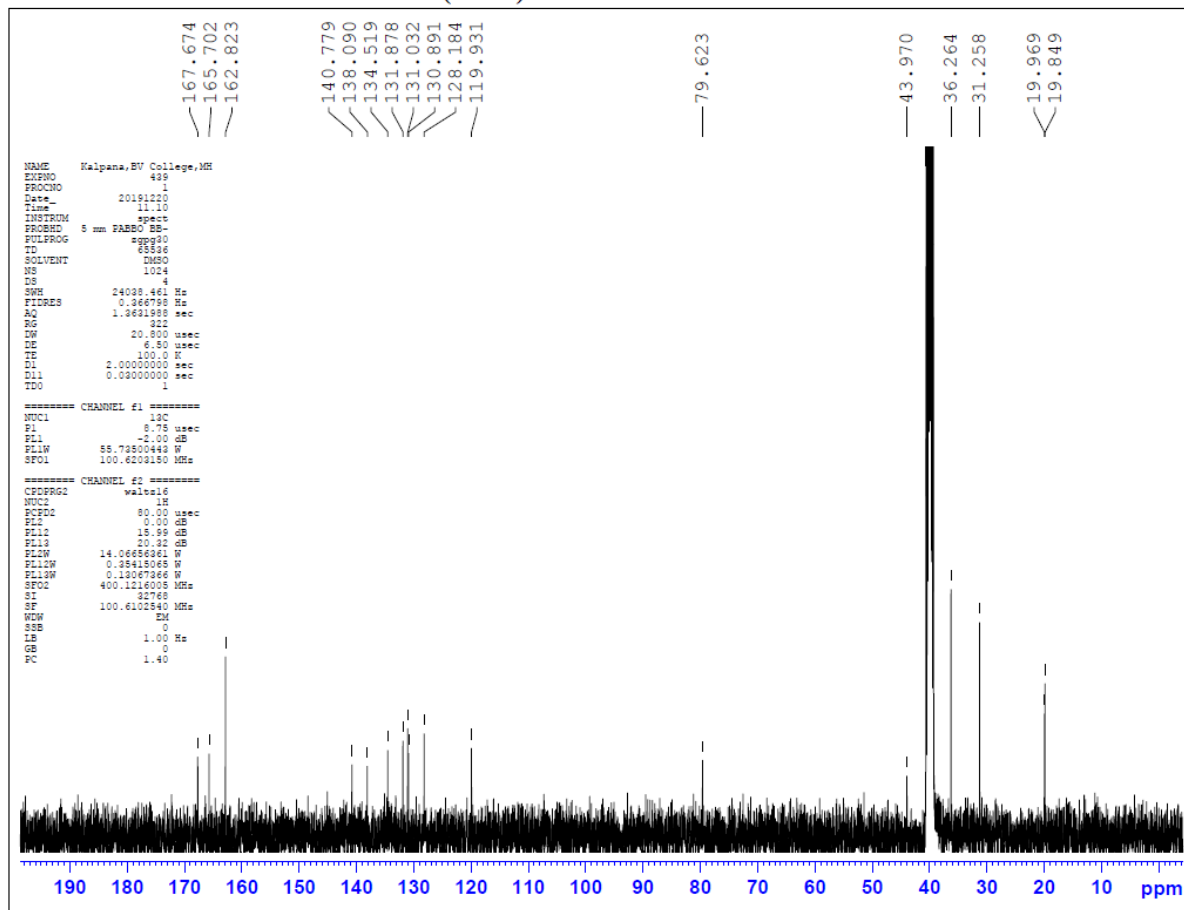

#### 4. HPLC

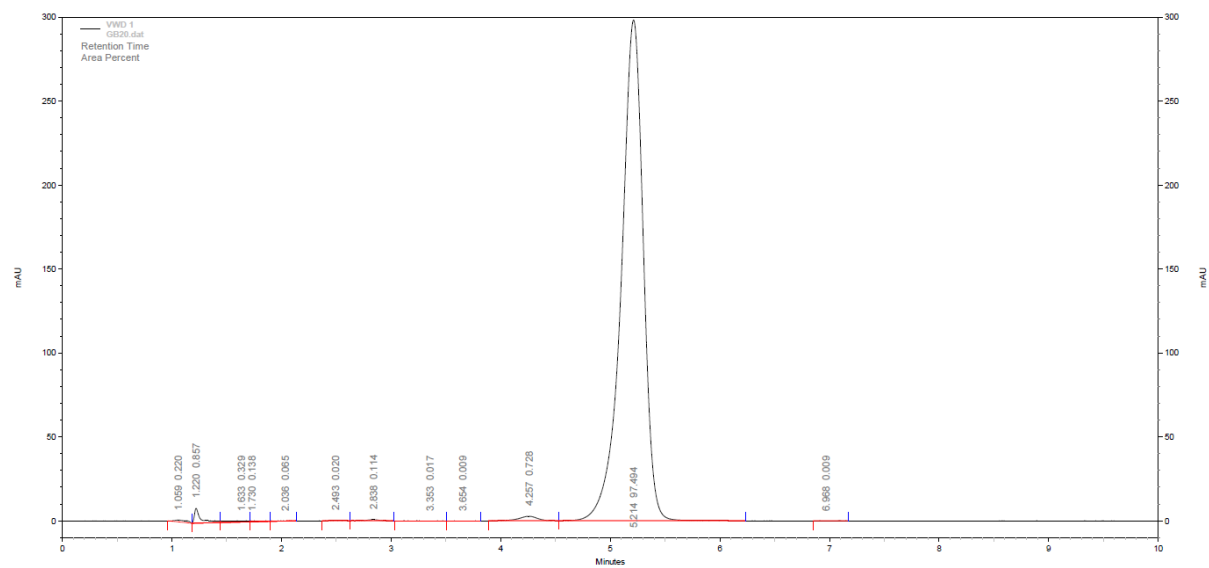

## 5. Mass

MS Spectrum

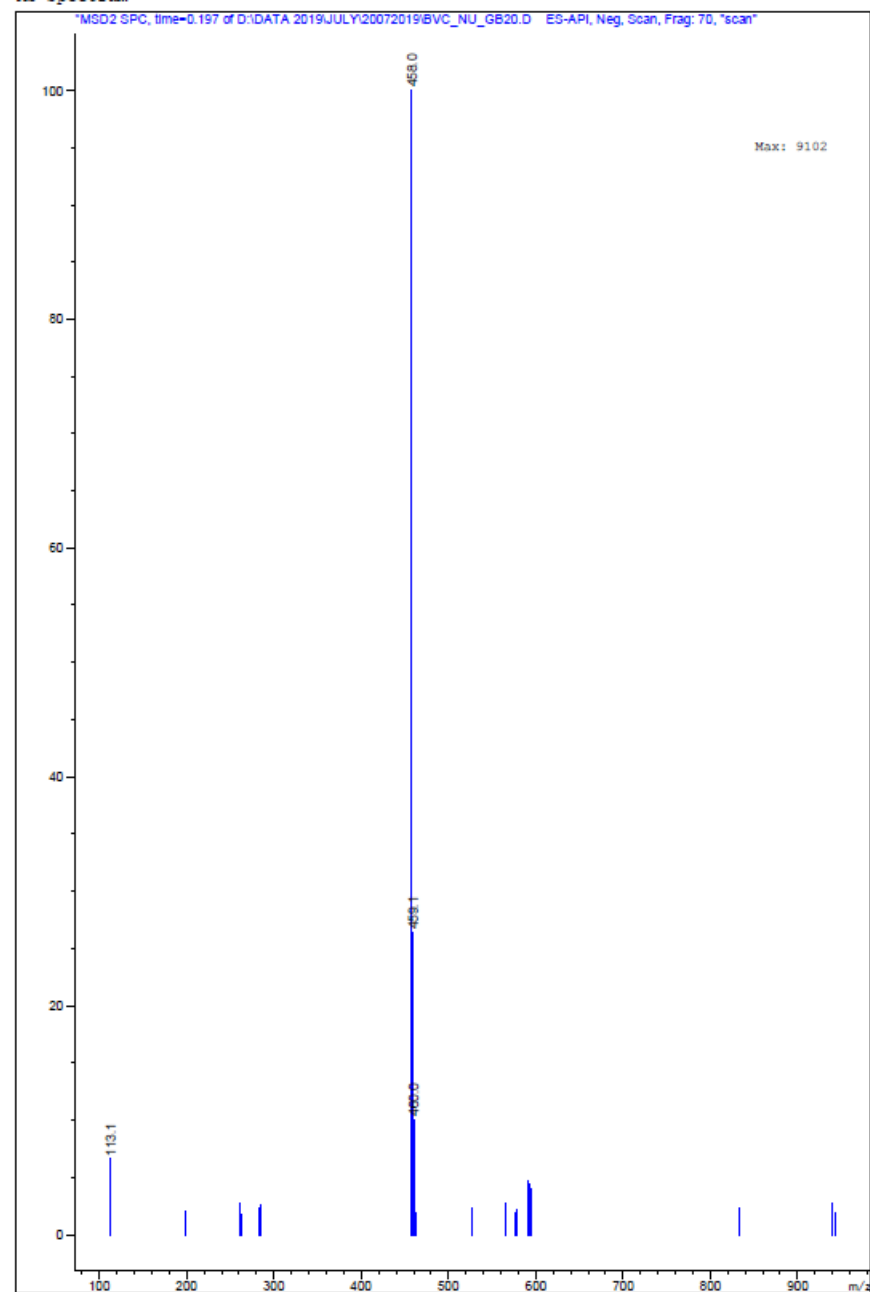

**N-(5,6-dimethylbenzo[d]thiazol-2-yl)-2-(5-(4-methylbenzylidene)-2,4-dioxothiazolidin-3-yl)acetamide (GB21)**

**1. FTIR**

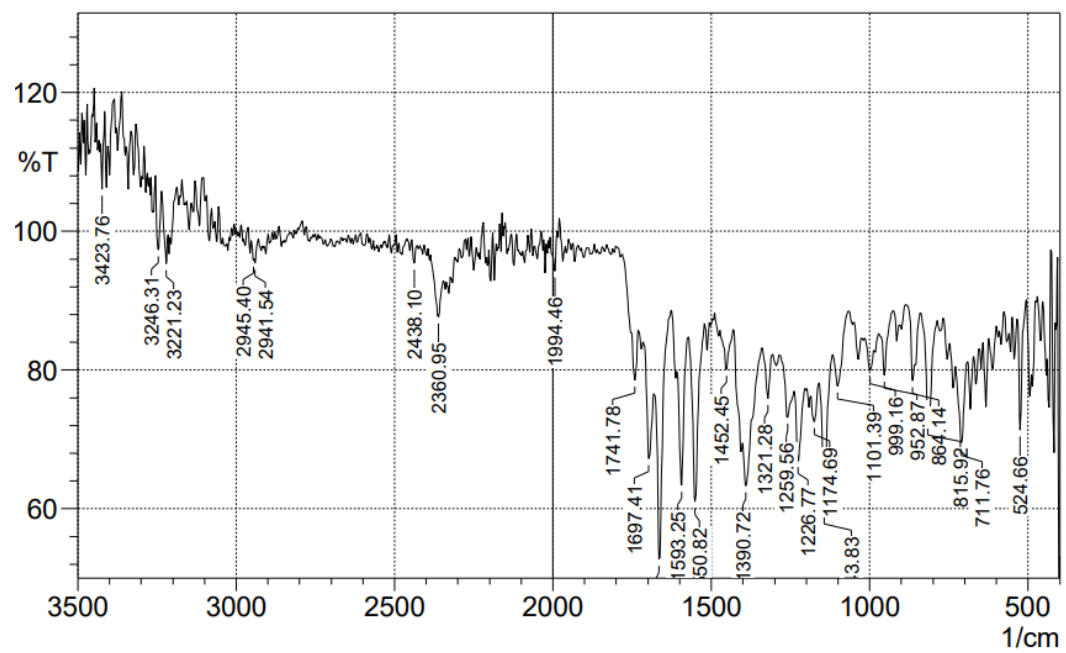

**2. <sup>1</sup>H-NMR**

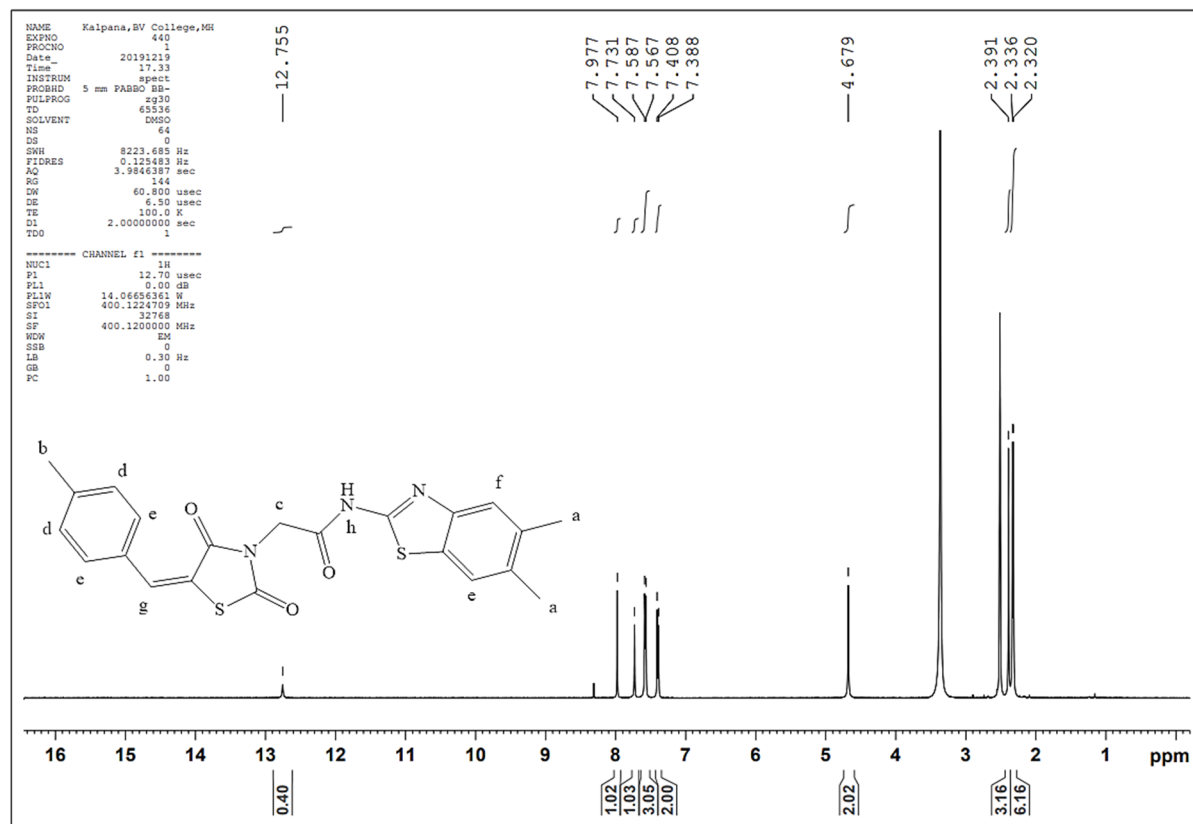

### 3. <sup>13</sup>C-NMR

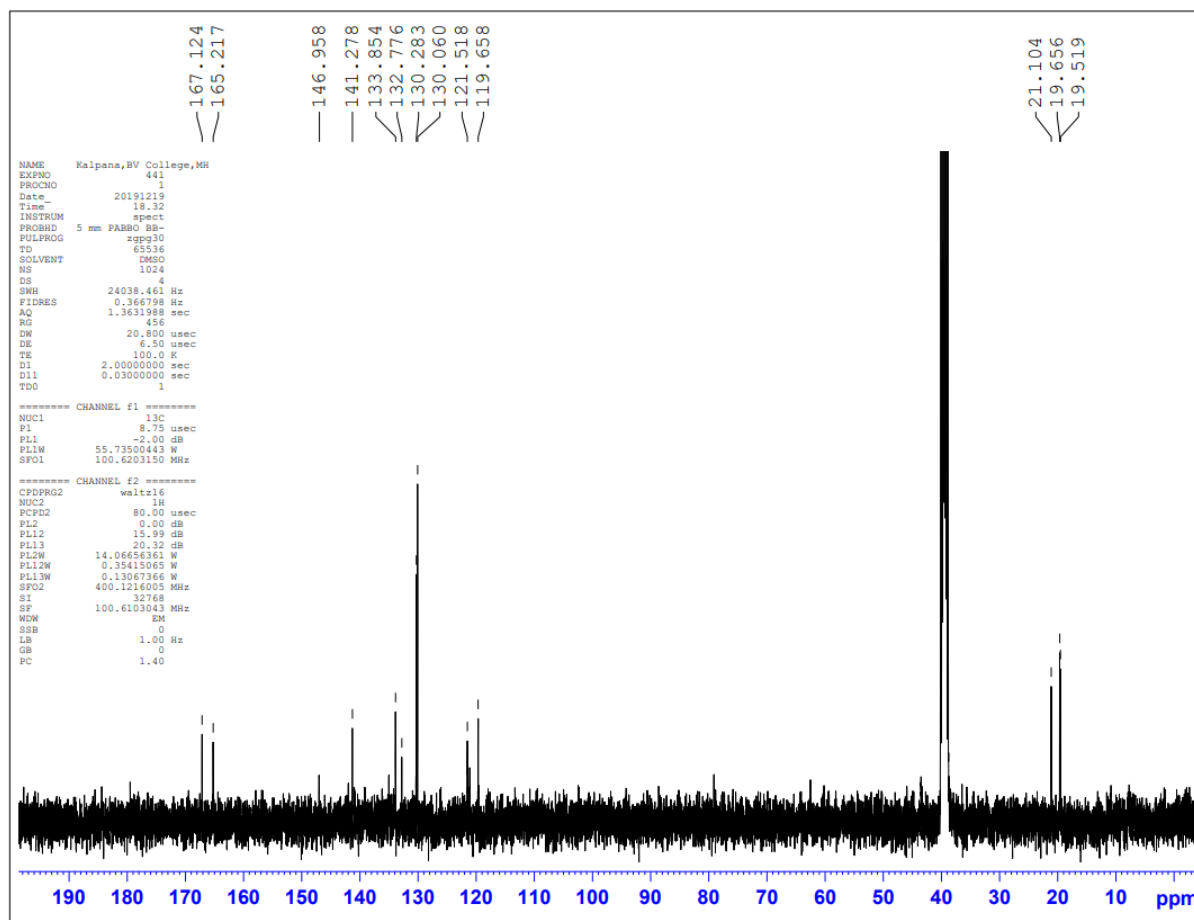

#### 4. HPLC Analysis

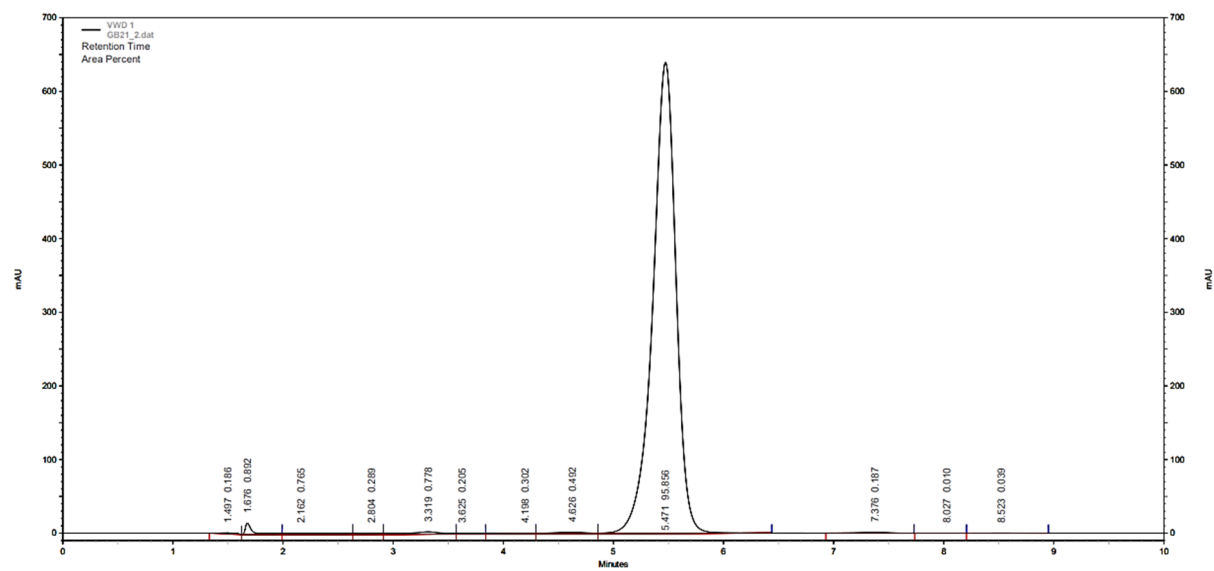

## 5. Mass Spectrometry

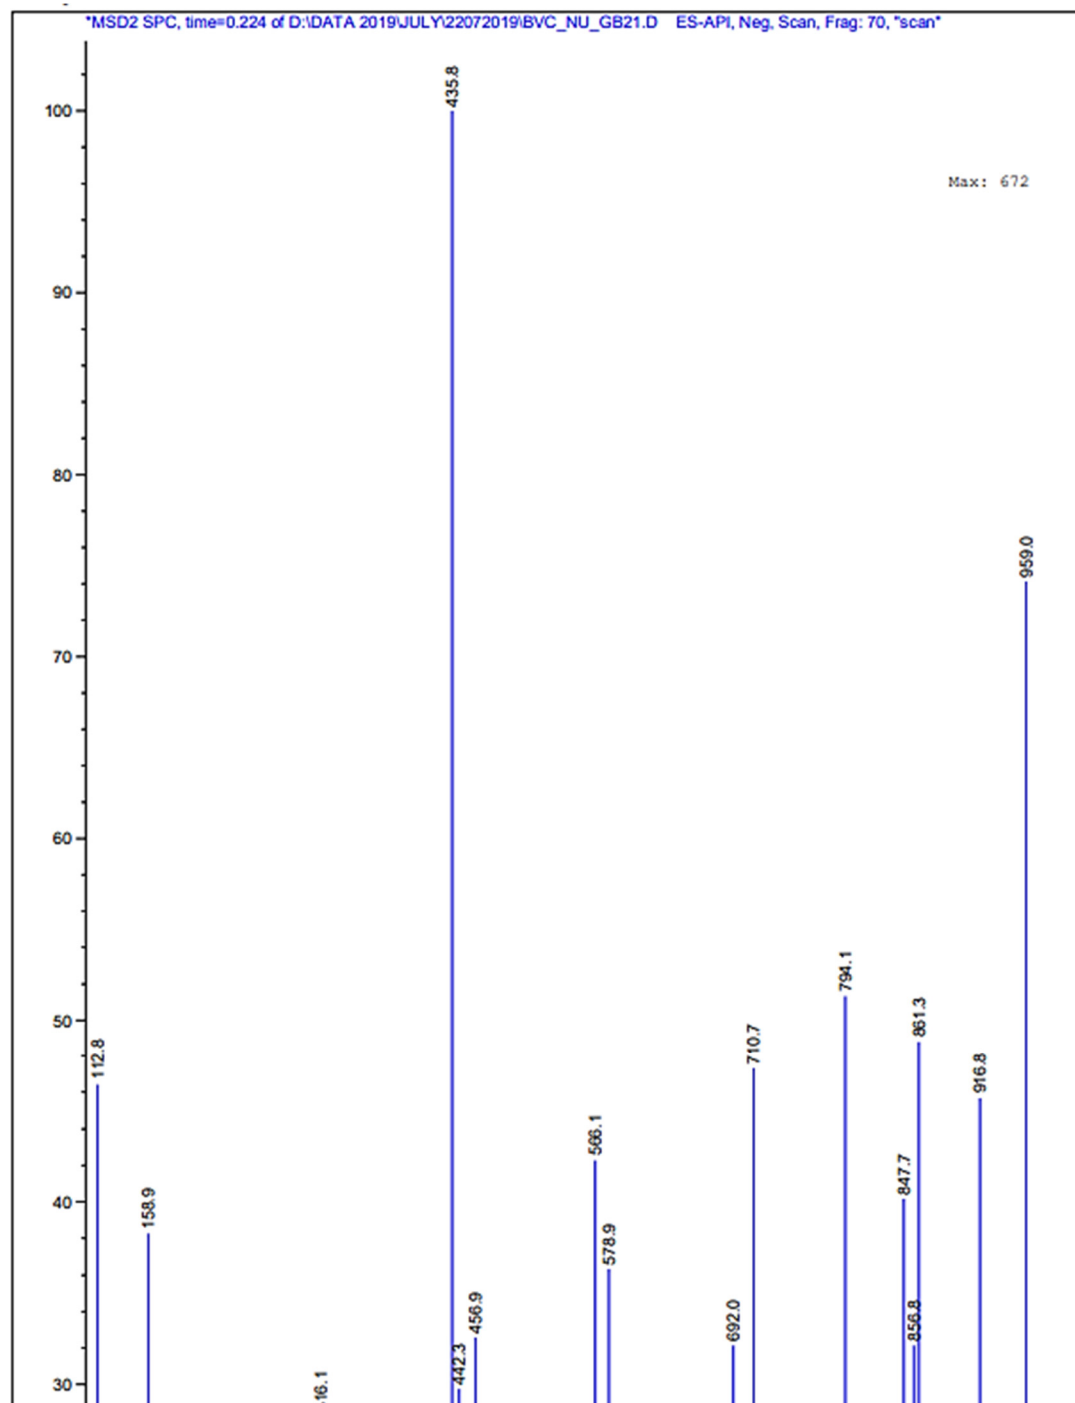



## 6. UV

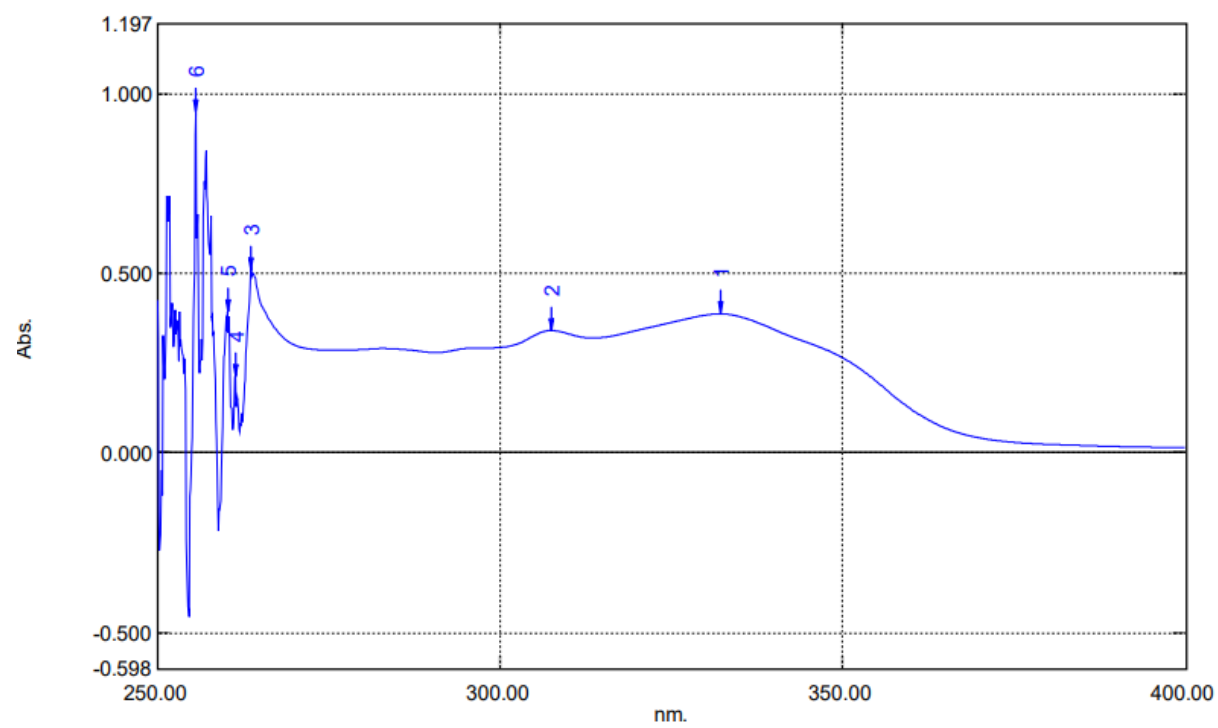

## 2-(5-benzylidene-2,4-dioxothiazolidin-3-yl)-N-(5,6-dimethylbenzo[d]thiazol-2-yl)acetamide (GB22)

### 1. FTIR

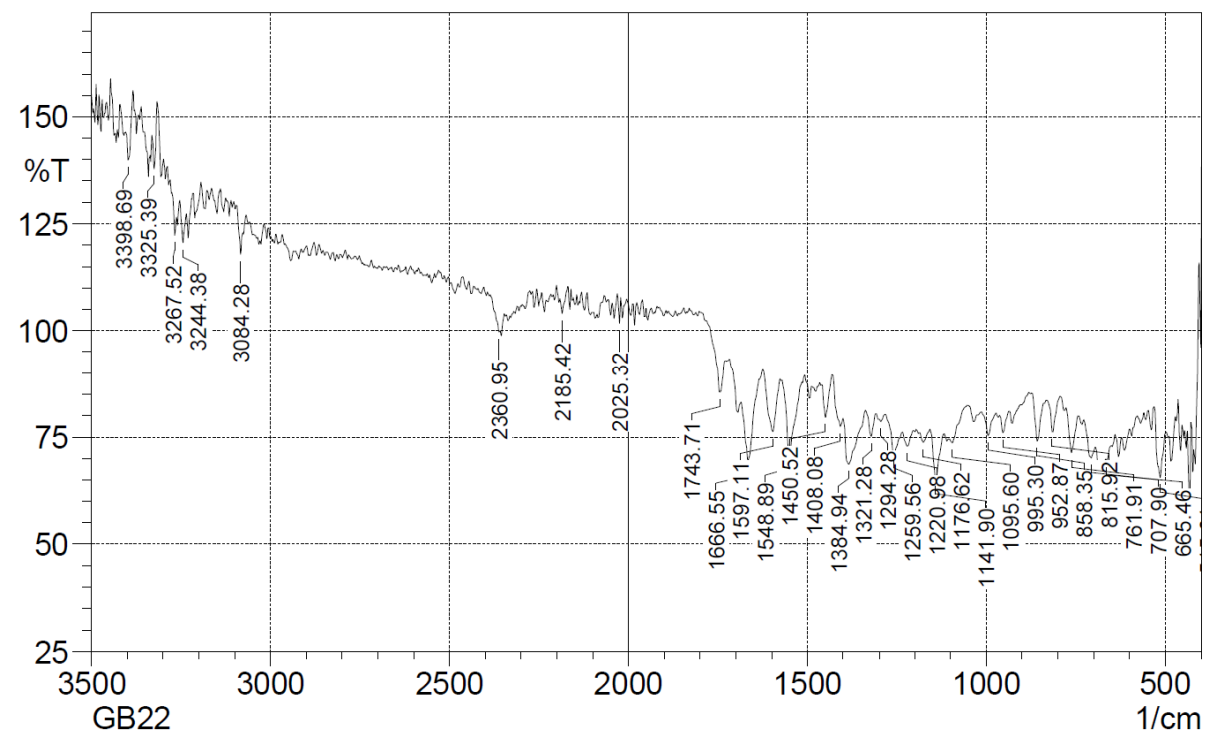

### 2. $^1\text{H}$ -NMR

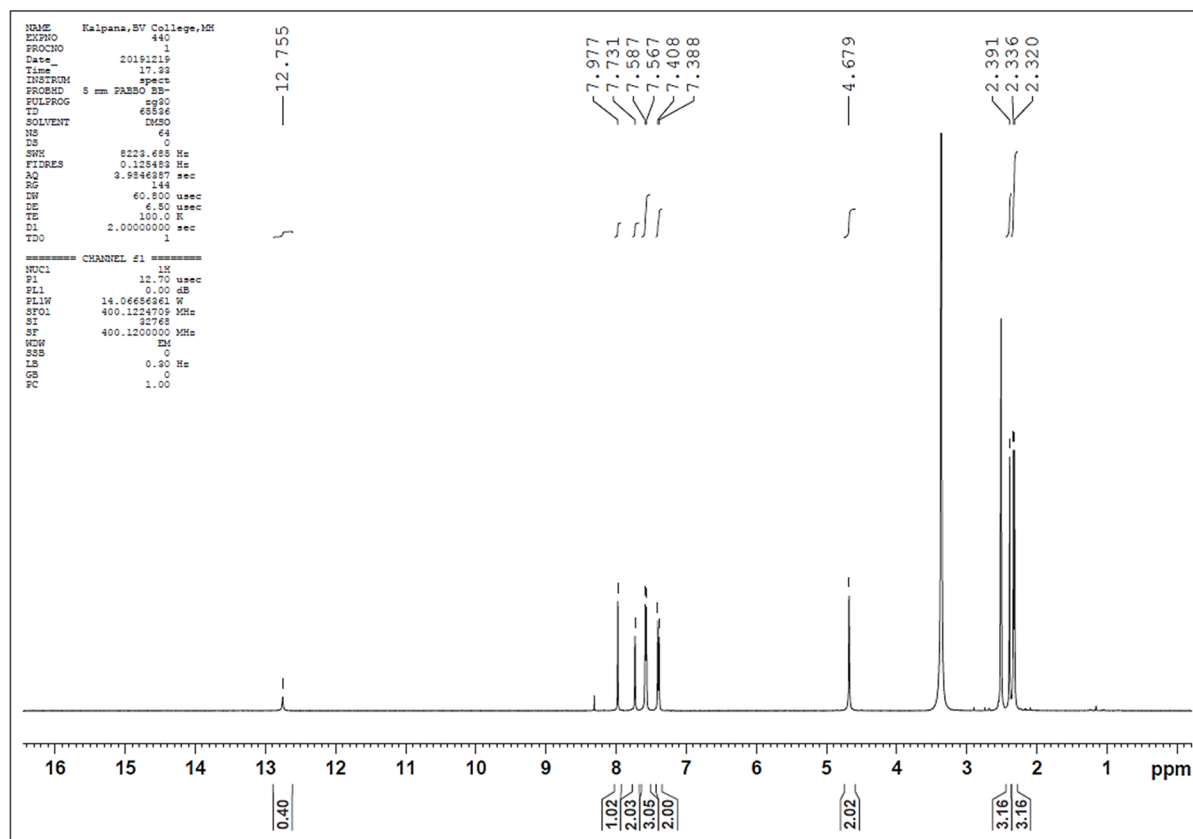

### 3. <sup>13</sup>C-NMR

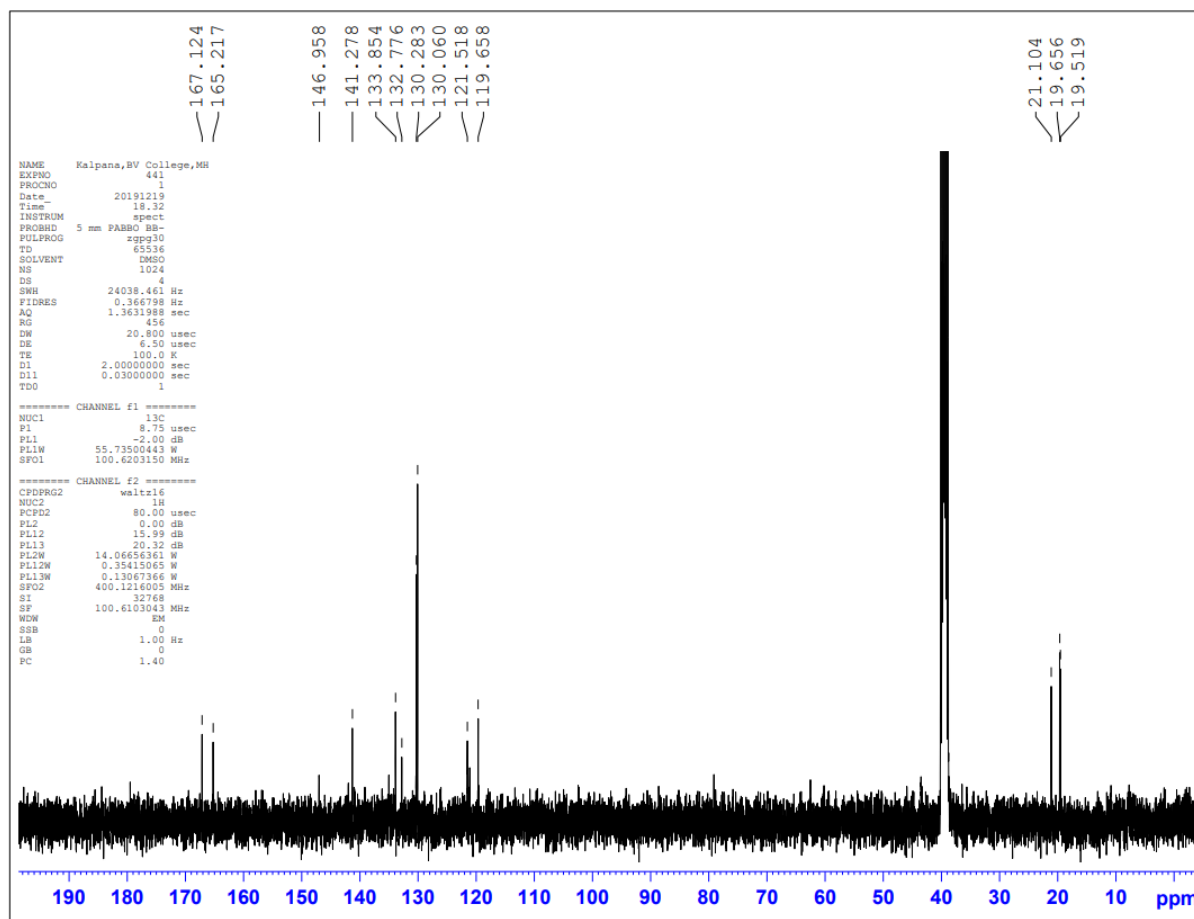

#### 4. HPLC

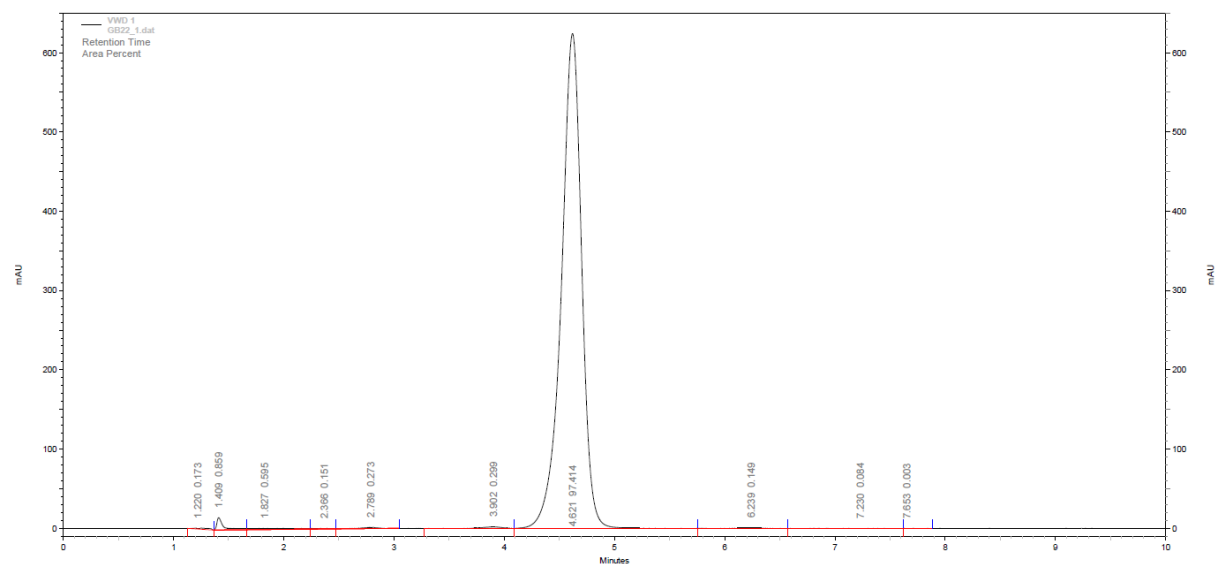

## 5. Mass

MS Spectrum

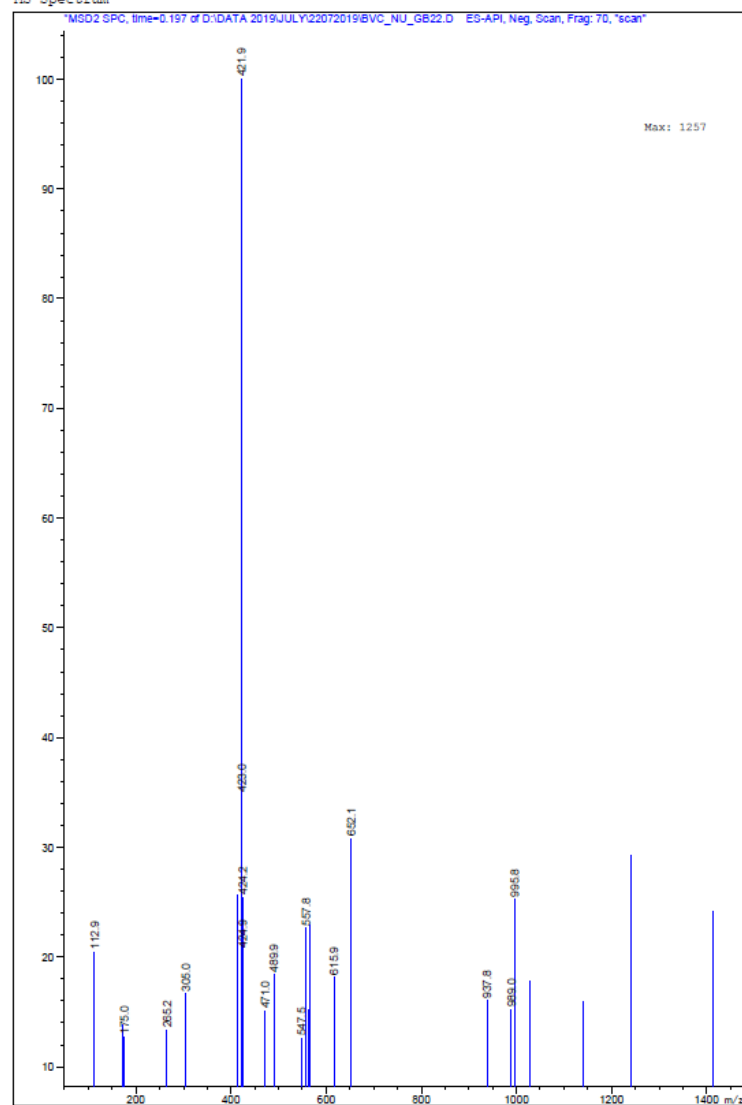

**2-(5-(4-bromobenzylidene)-2,4-dioxothiazolidin-3-yl)-N-(5,6-dimethylbenzo[d]thiazol-2-yl)acetamide (GB23)**

**1. FTIR**

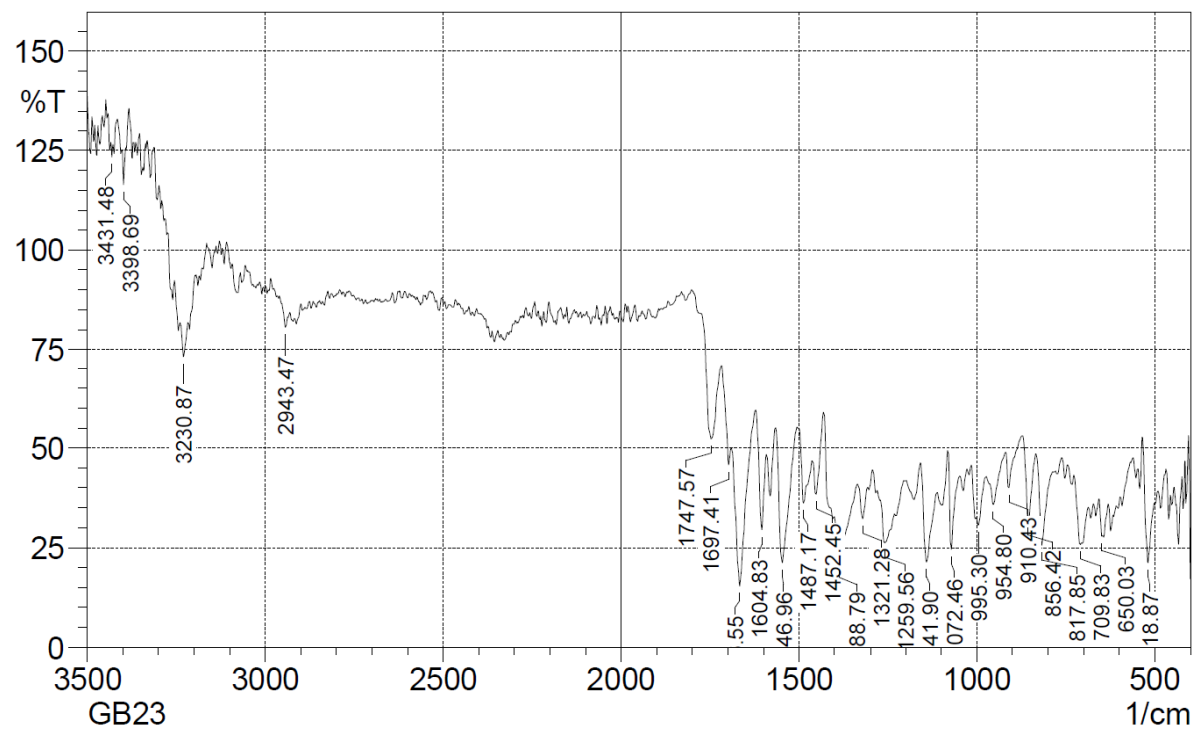

**2. <sup>1</sup>HNMR**

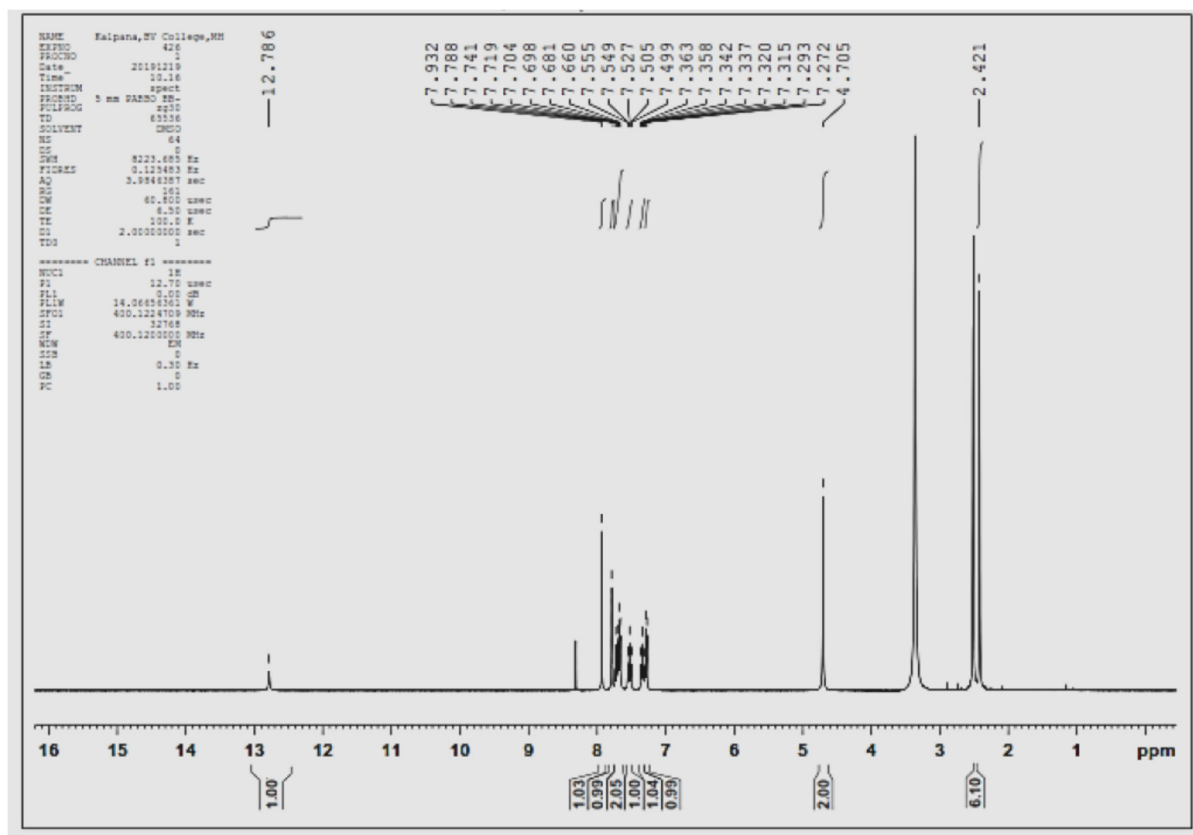

3.  $^{13}\text{C}$ NMR



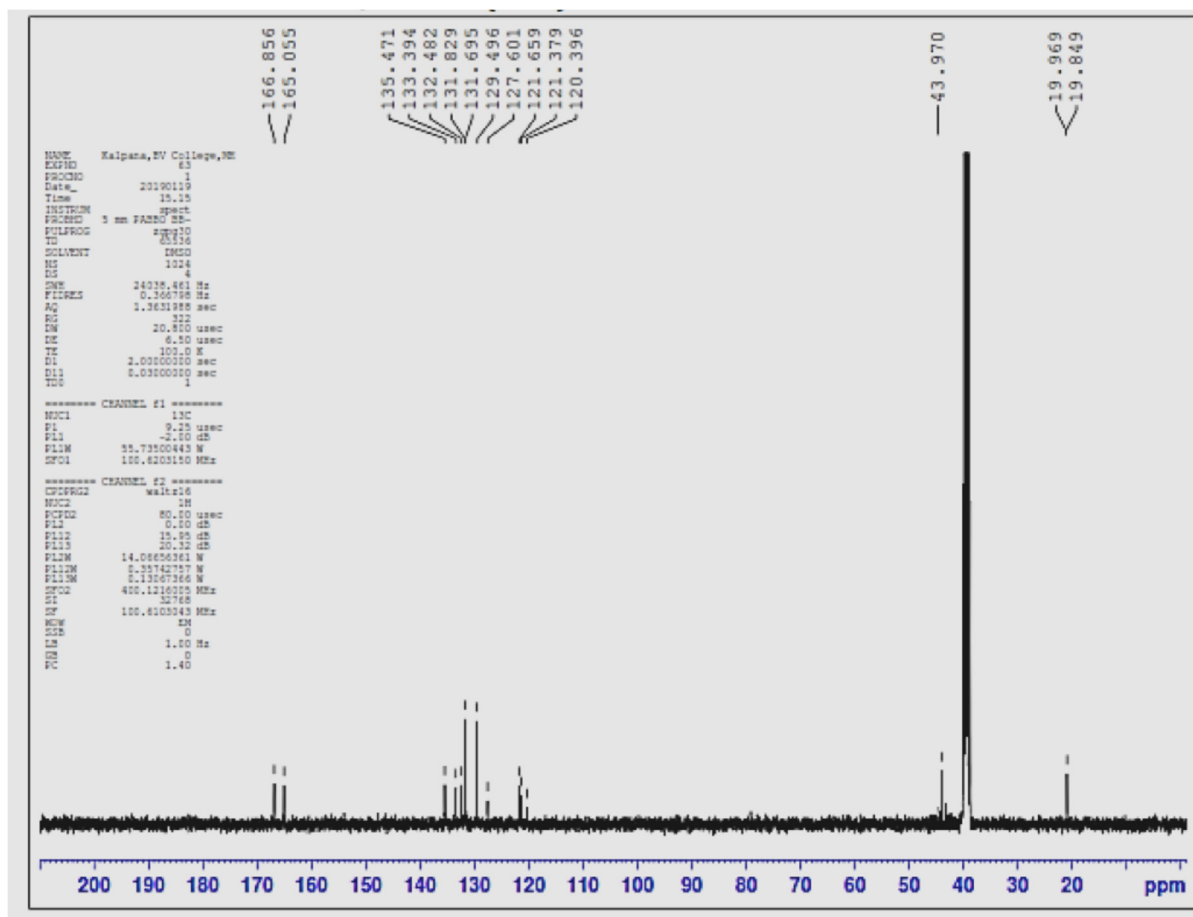

#### 4. HPLC

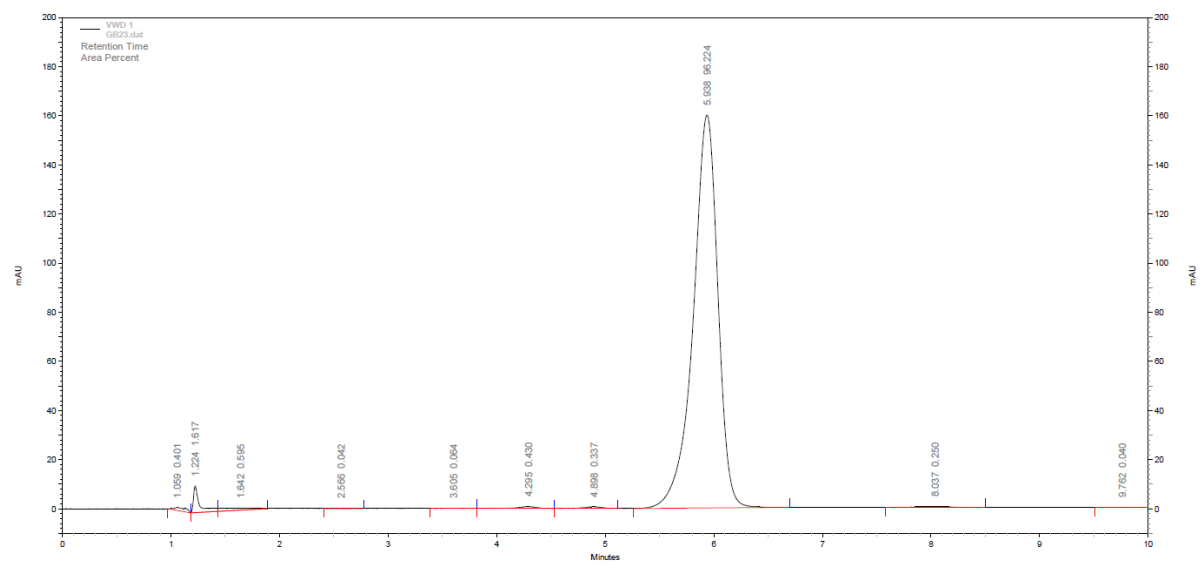

## 5. Mass

MS Spectrum

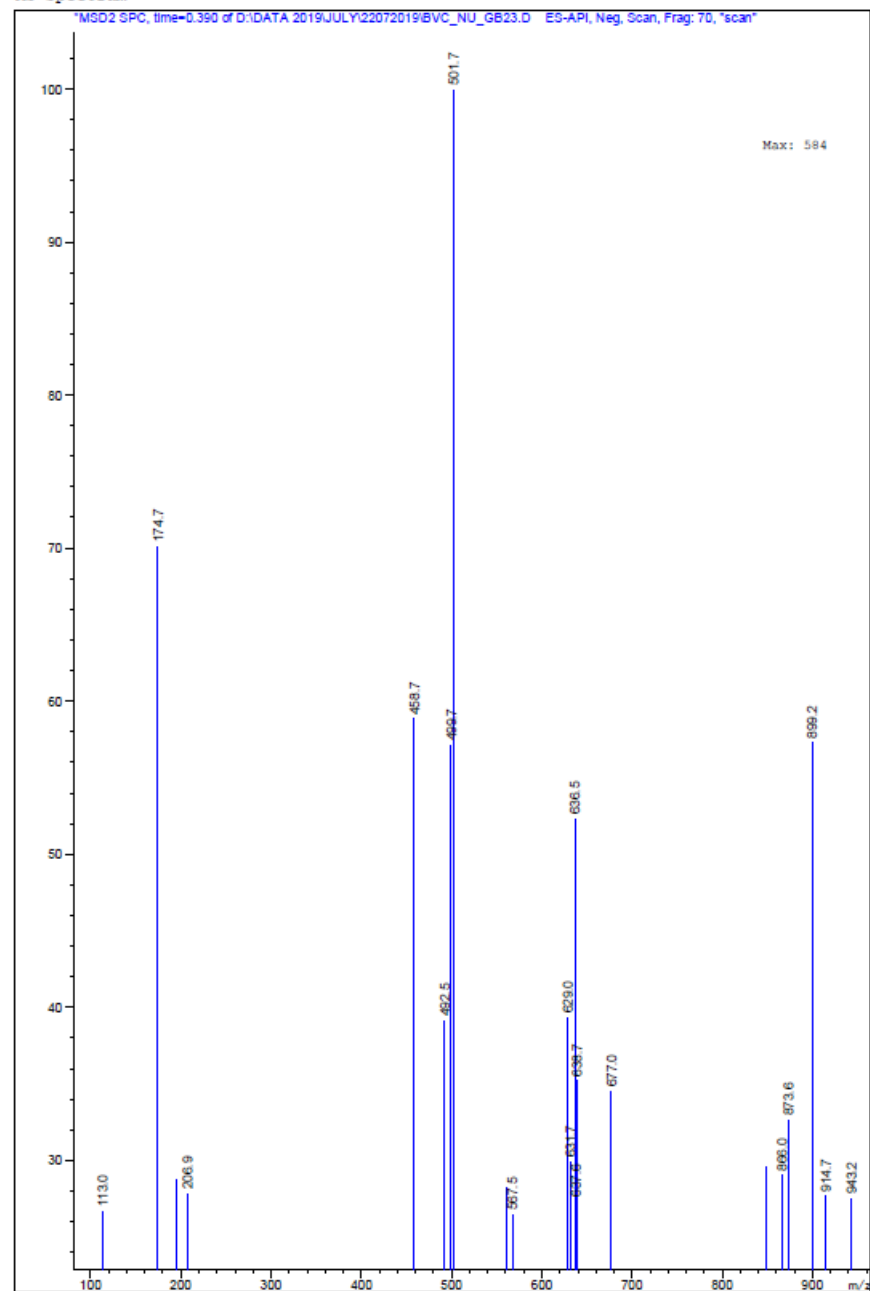

**2-(5-(4-chlorobenzylidene)-2,4-dioxothiazolidin-3-yl)-N-(5,6-dimethylbenzo[d]thiazol-2-yl)acetamide (GB24)**

**1. FTIR –**

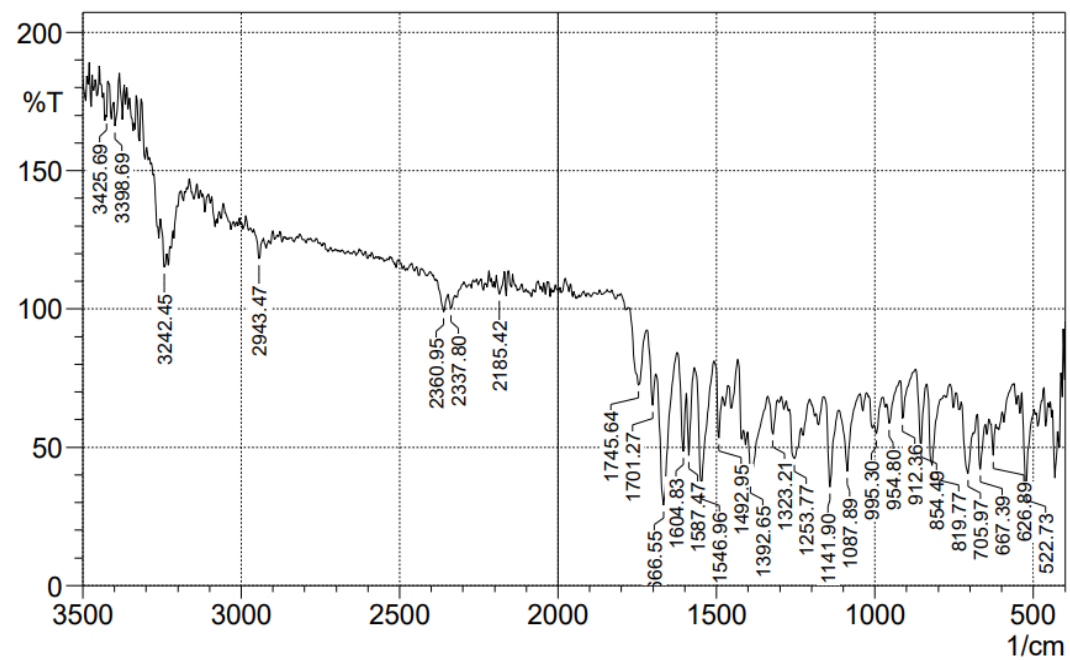

**2. <sup>1</sup>H-NMR**

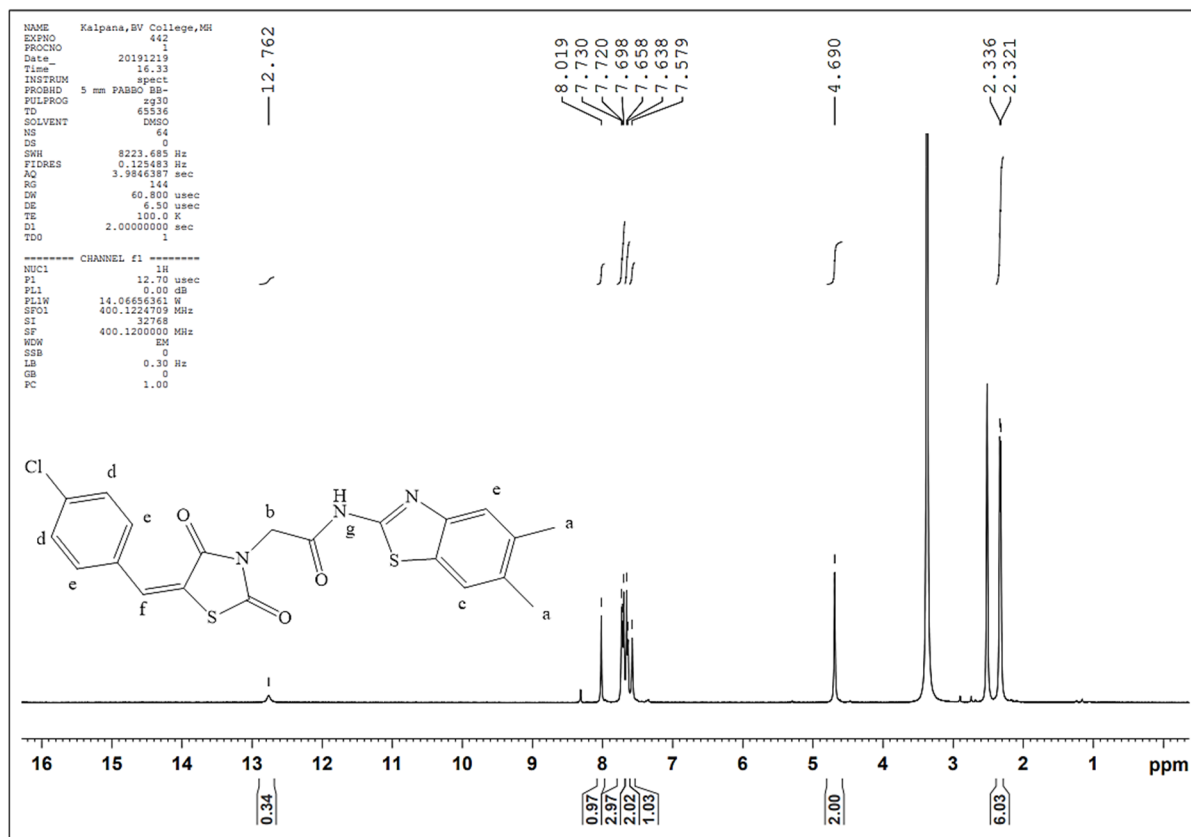

### 3. <sup>13</sup>C-NMR

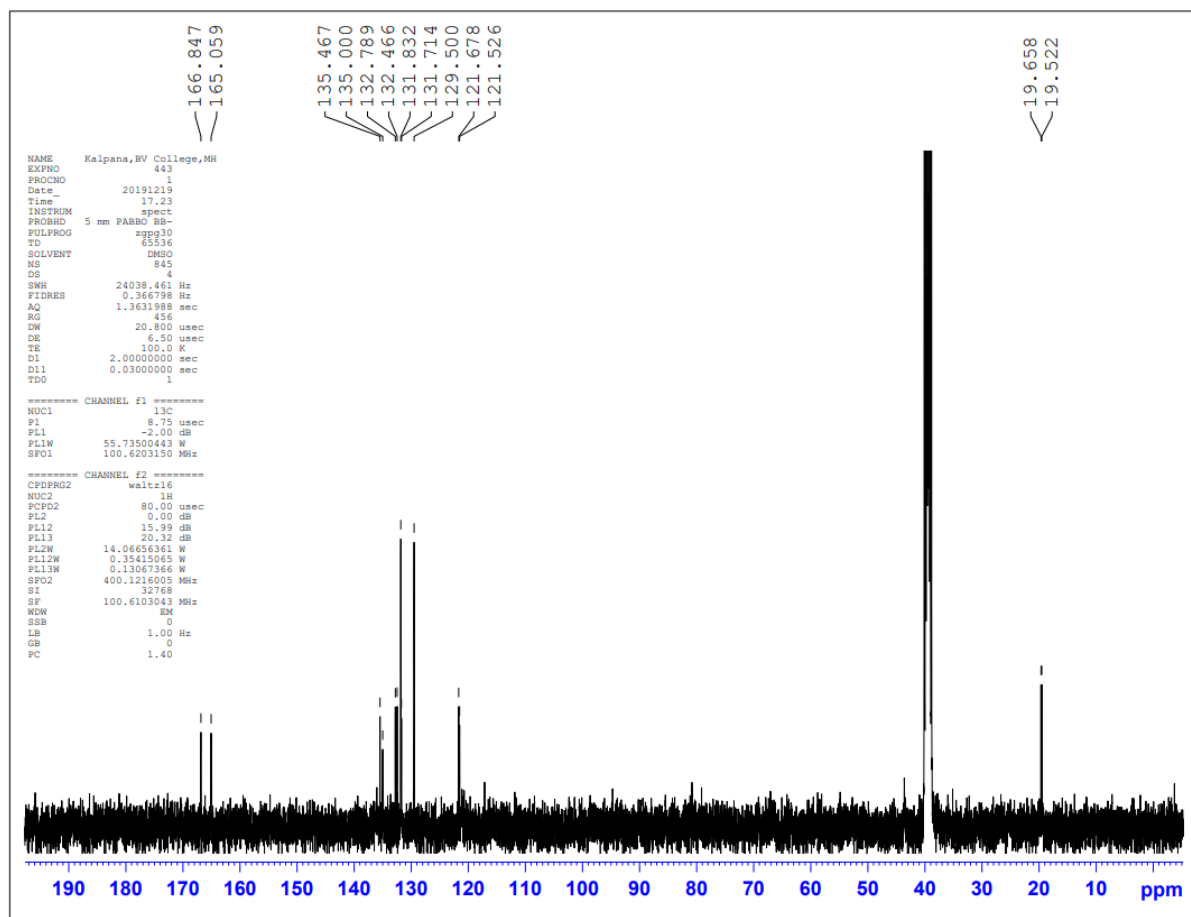

#### 4. HPLC Analysis

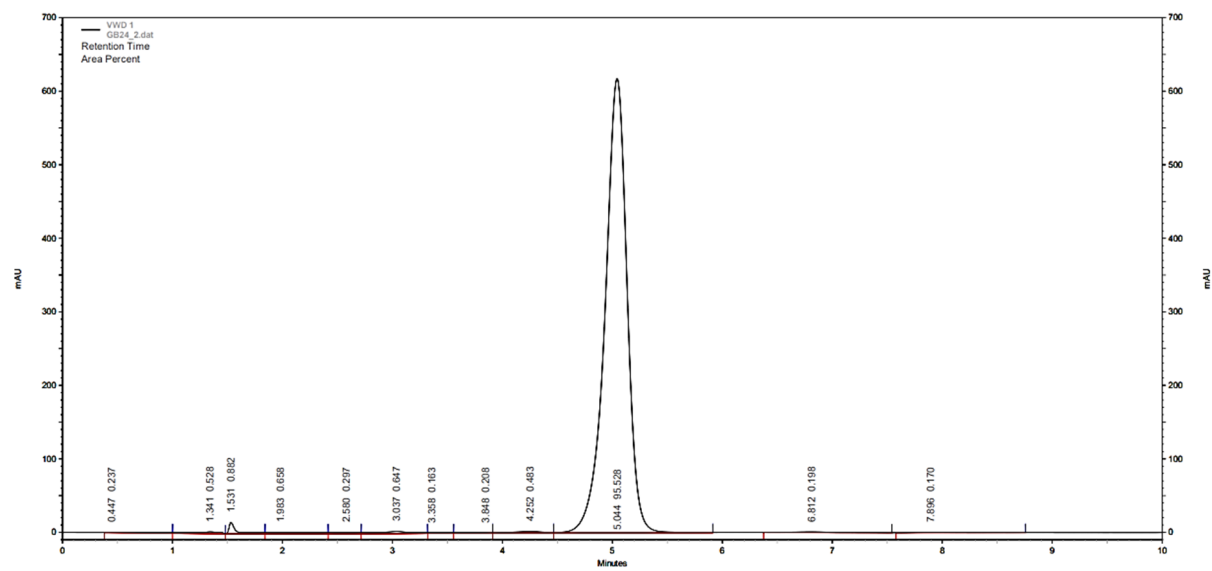

## 5. Mass Spectrometry

\*MSD2 SPC, time=0.252 of D:\DATA 2019\JULY\22072019\BVC\_NU\_GB24.D ES-API, Neg. Scan, Frag: 70, "scan"

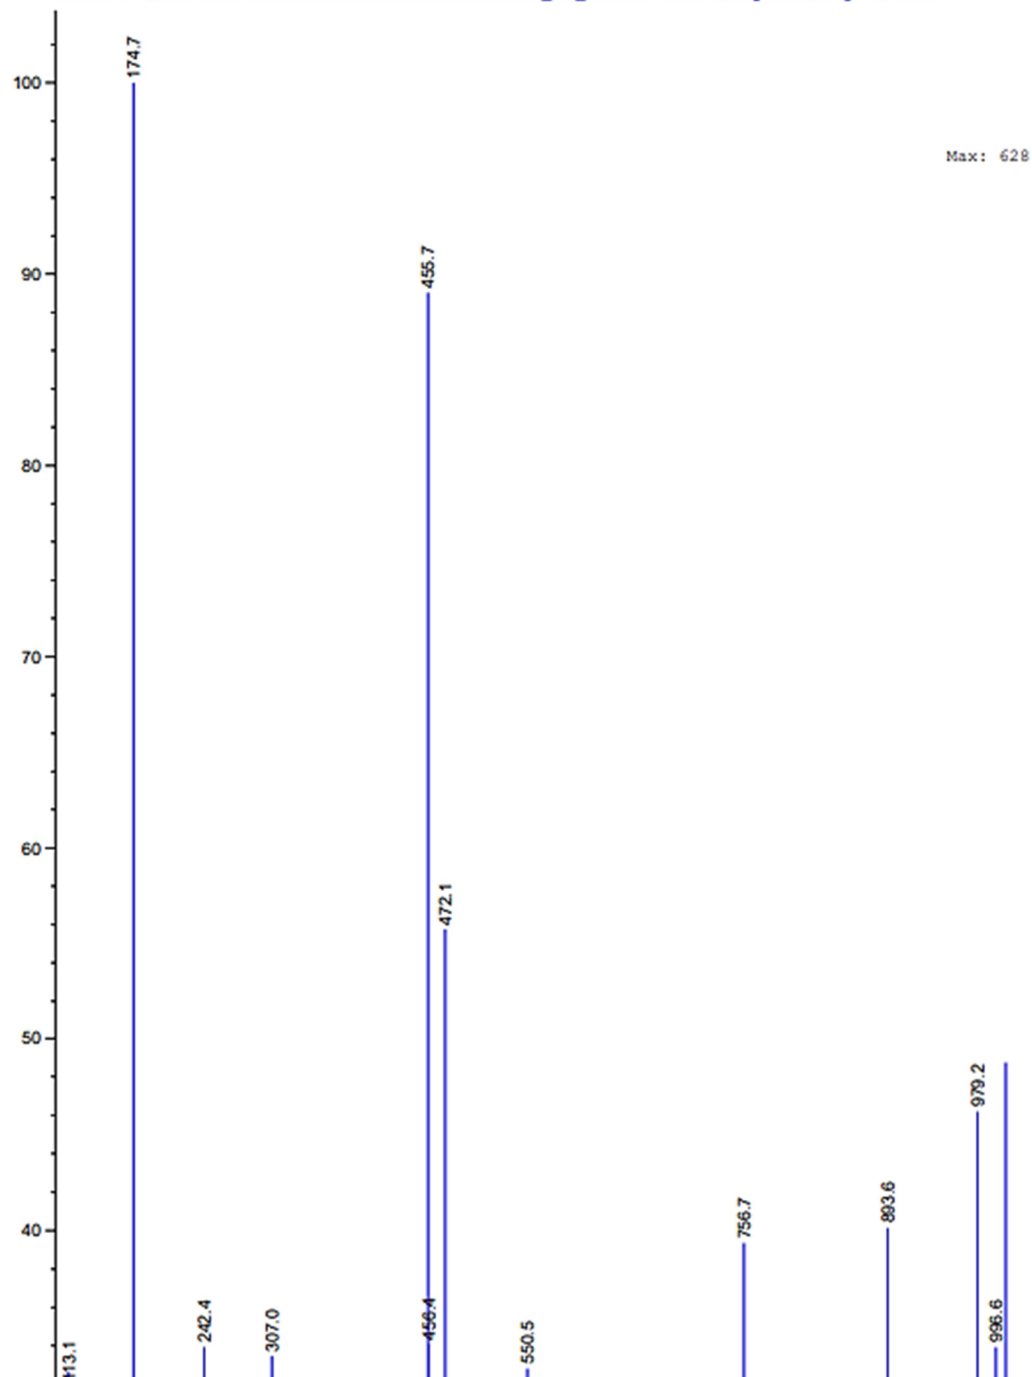



## 6. UV

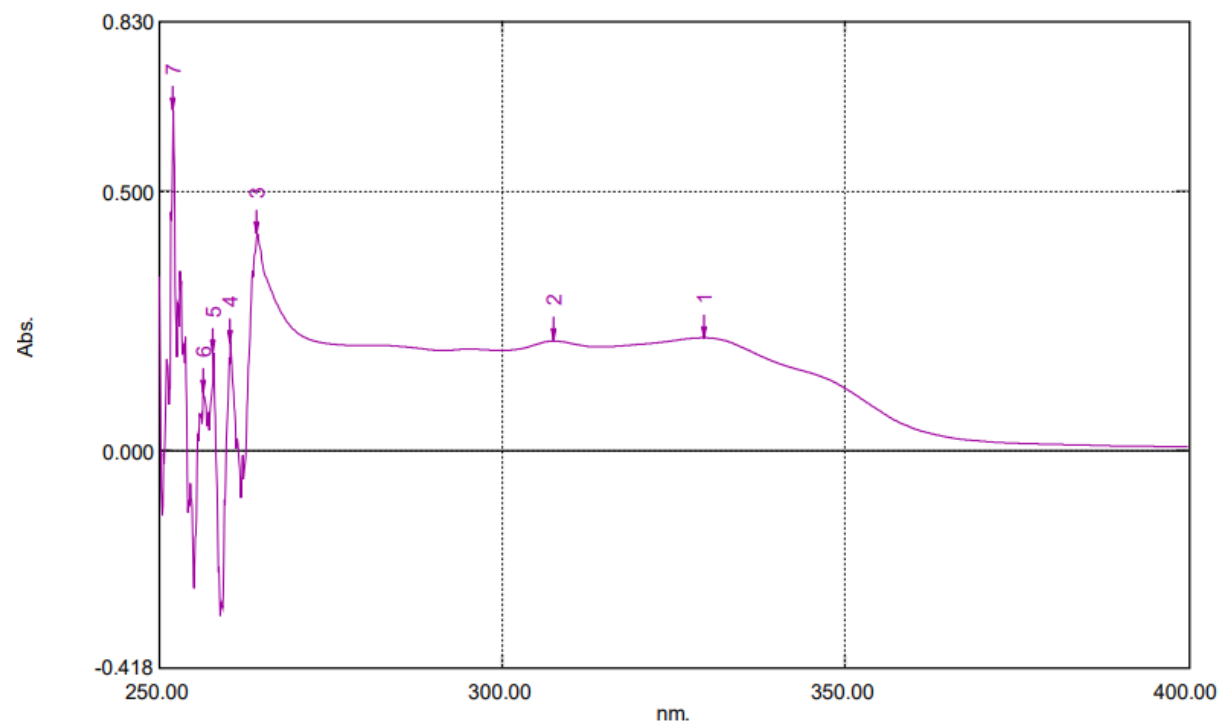

**N-(5,6-dimethylbenzo[d]thiazol-2-yl)-2-(5-(4-fluorobenzylidene)-2,4-dioxothiazolidin-3-yl)acetamide (GB25)**

**1. FTIR**

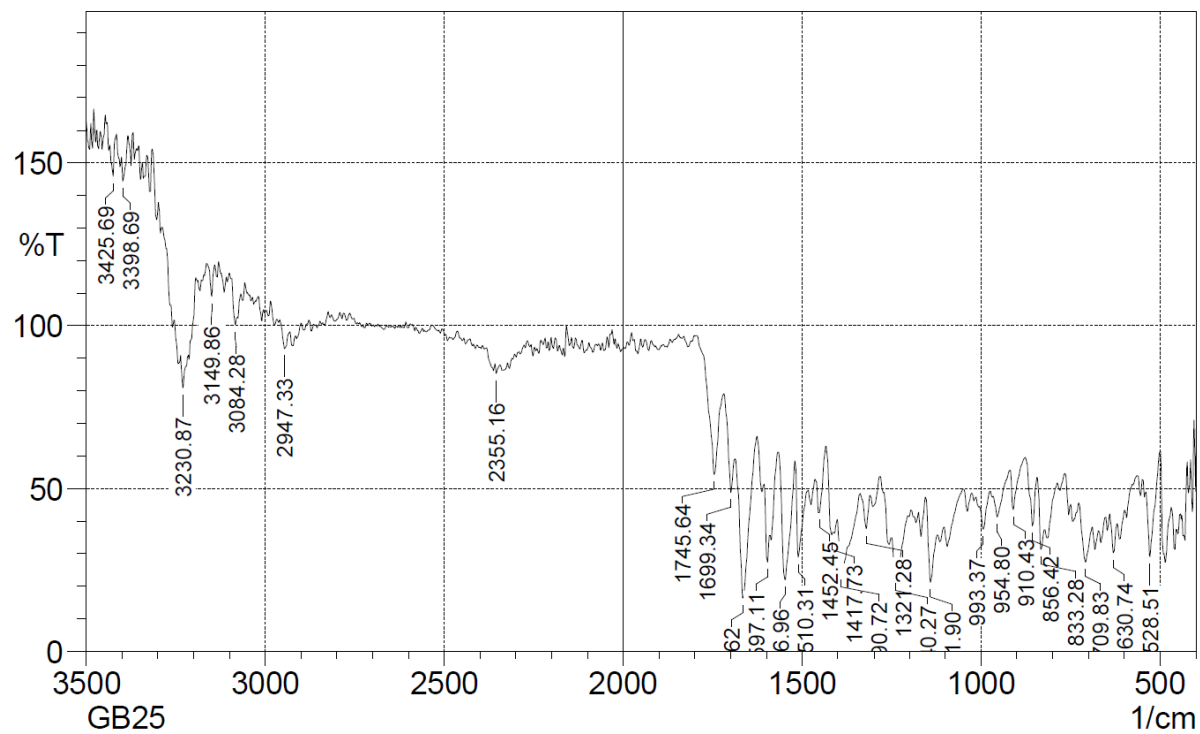

**2. <sup>1</sup>H NMR**

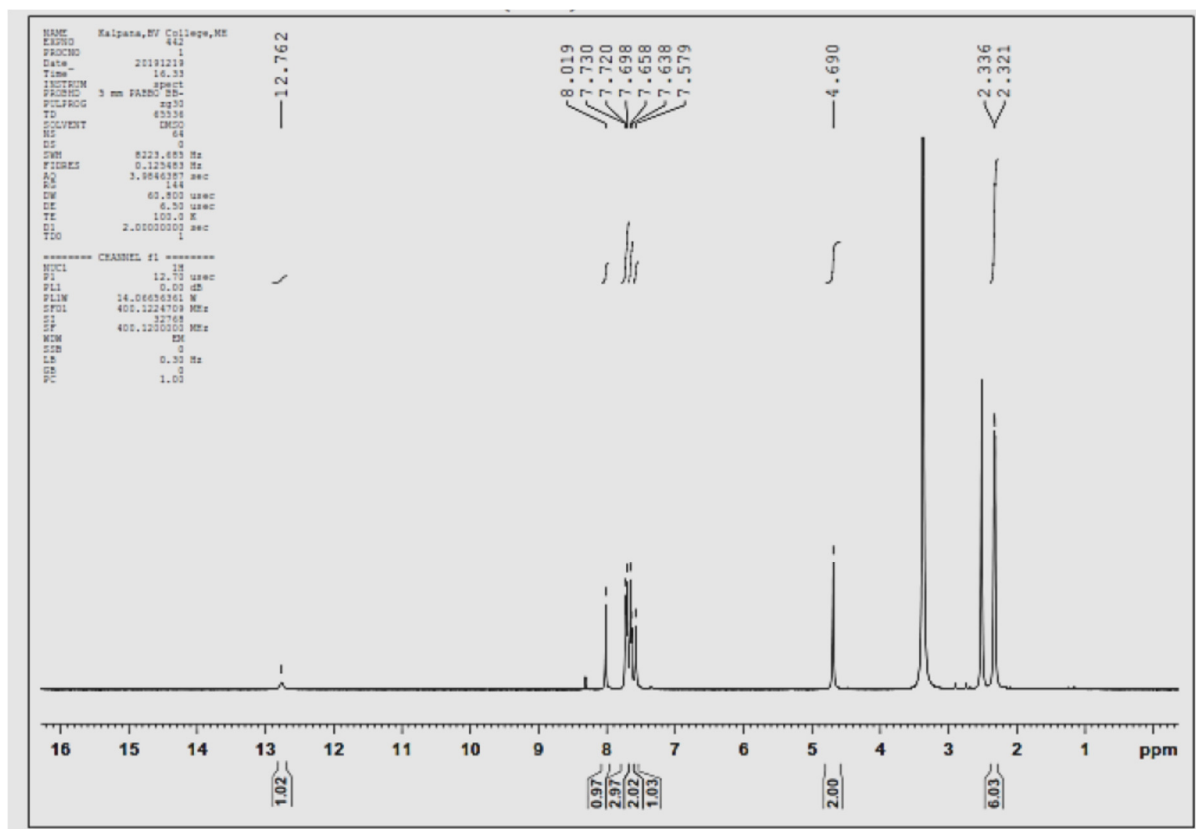

3.  $^{13}\text{C}$ NMR

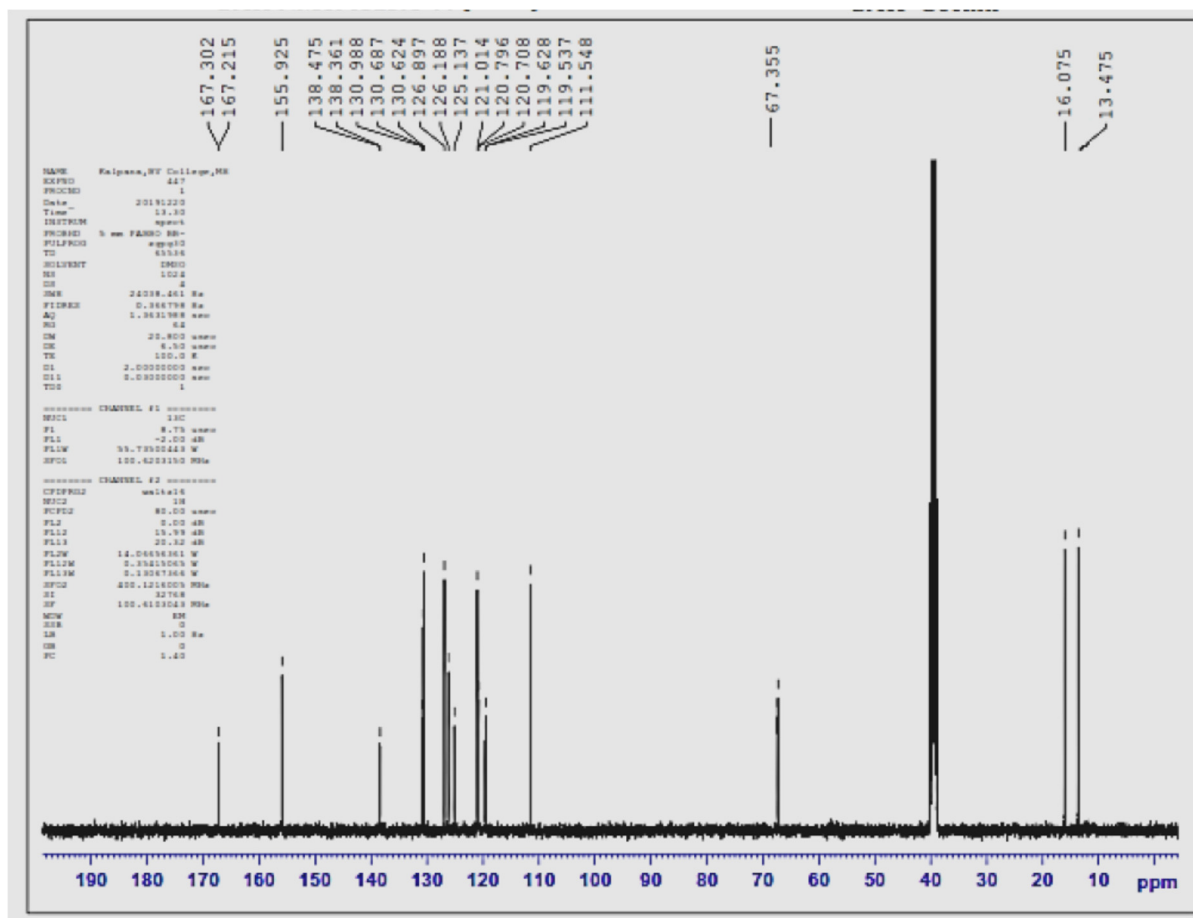

#### 4. HPLC

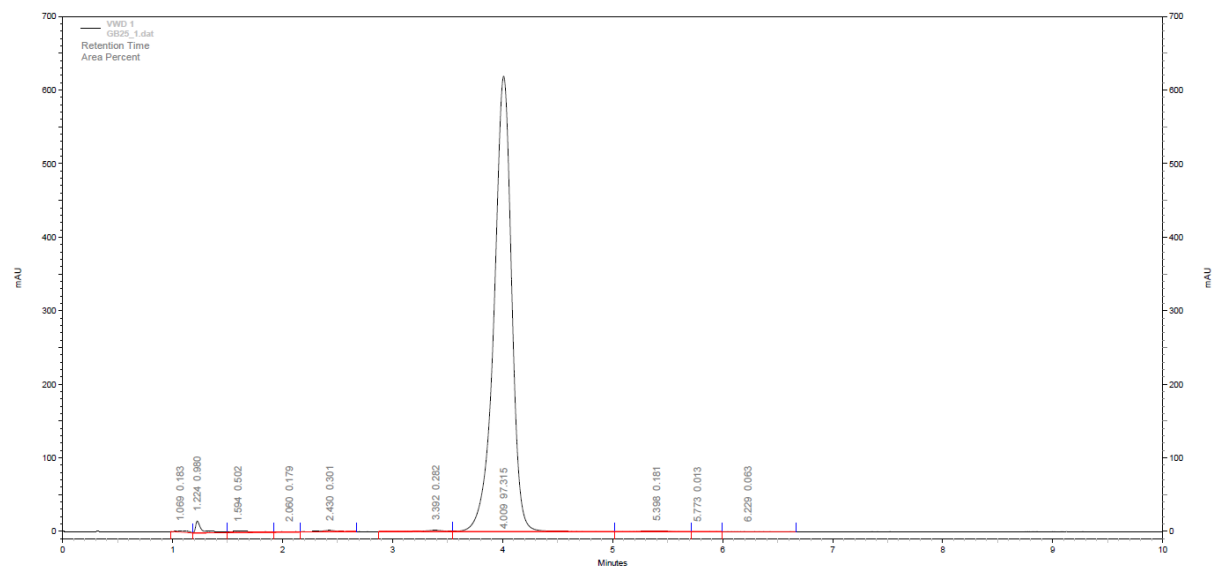

## 5. Mass

MS Spectrum

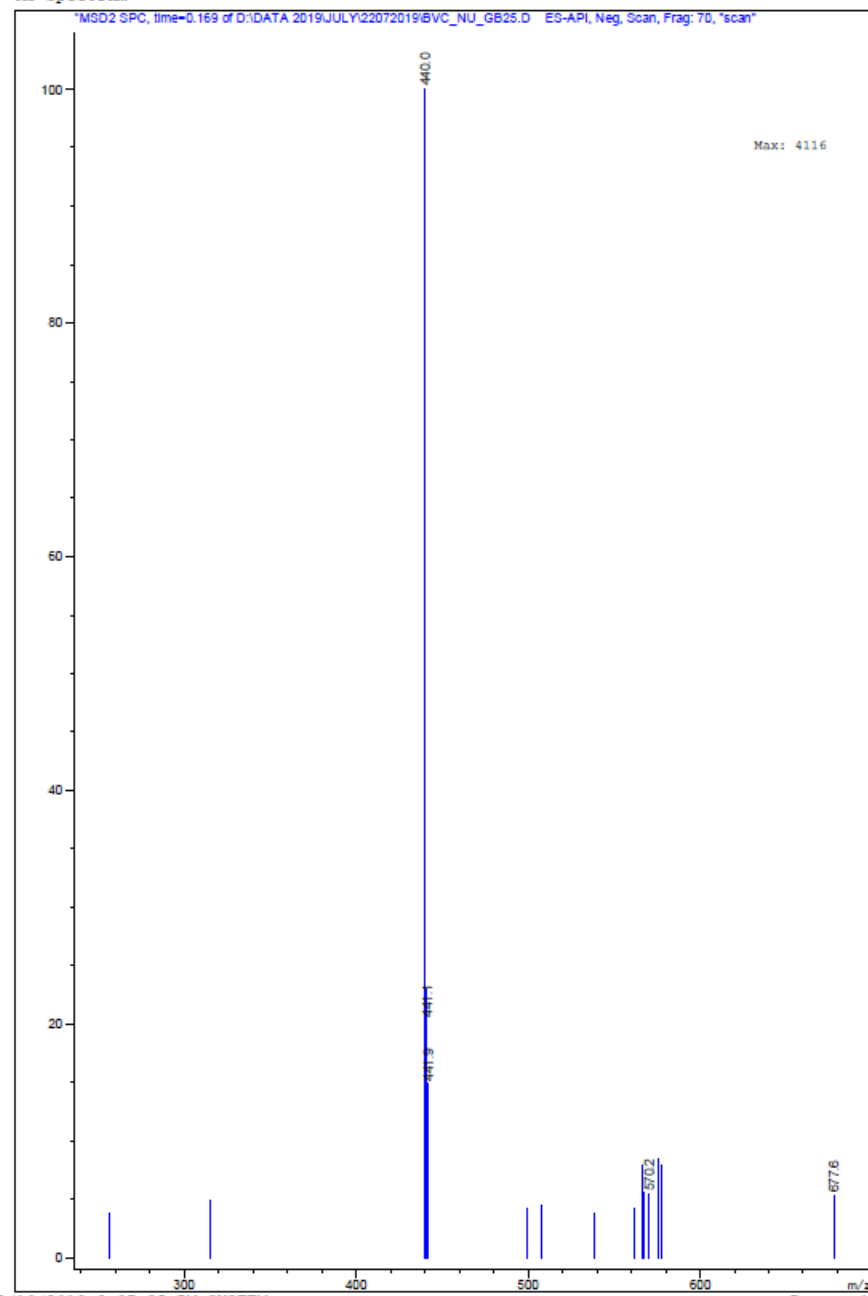

**N-(5,6-dimethylbenzo[d]thiazol-2-yl)-2-(5-(3,4-dimethylbenzylidene)-2,4-dioxothiazolidin-3-yl)acetamide (GB26)**

**1. FTIR**

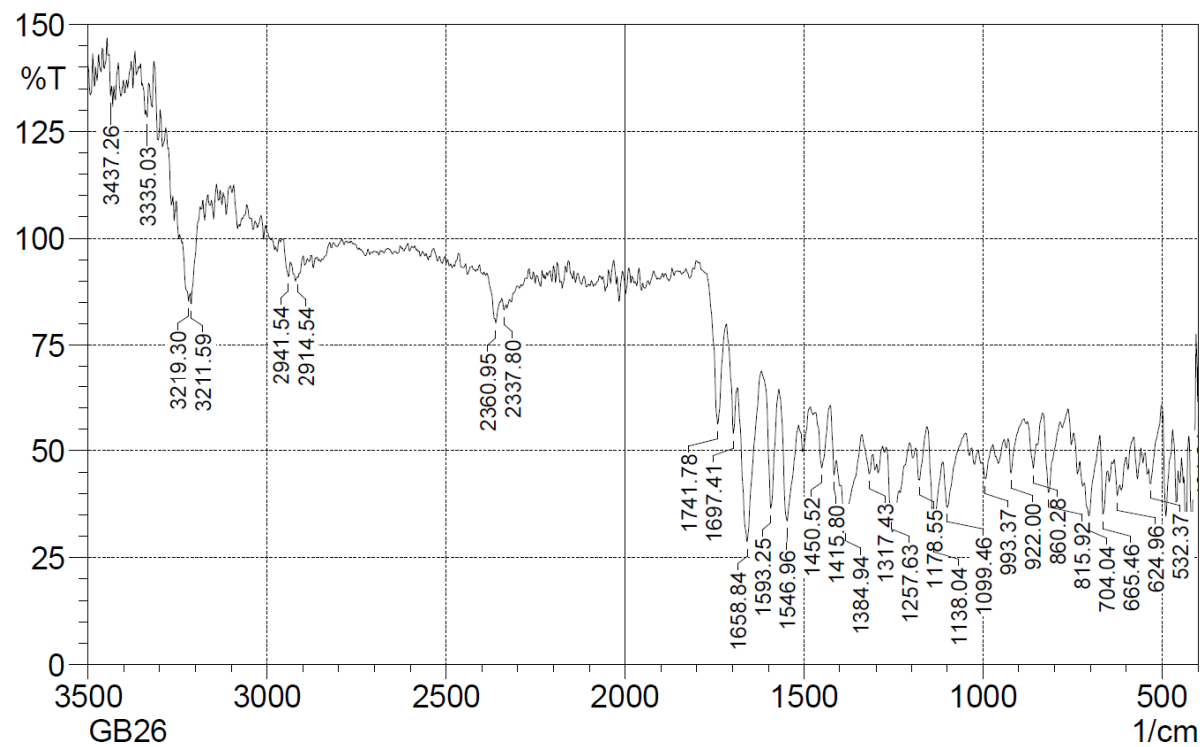

**2. <sup>1</sup>H-NMR**

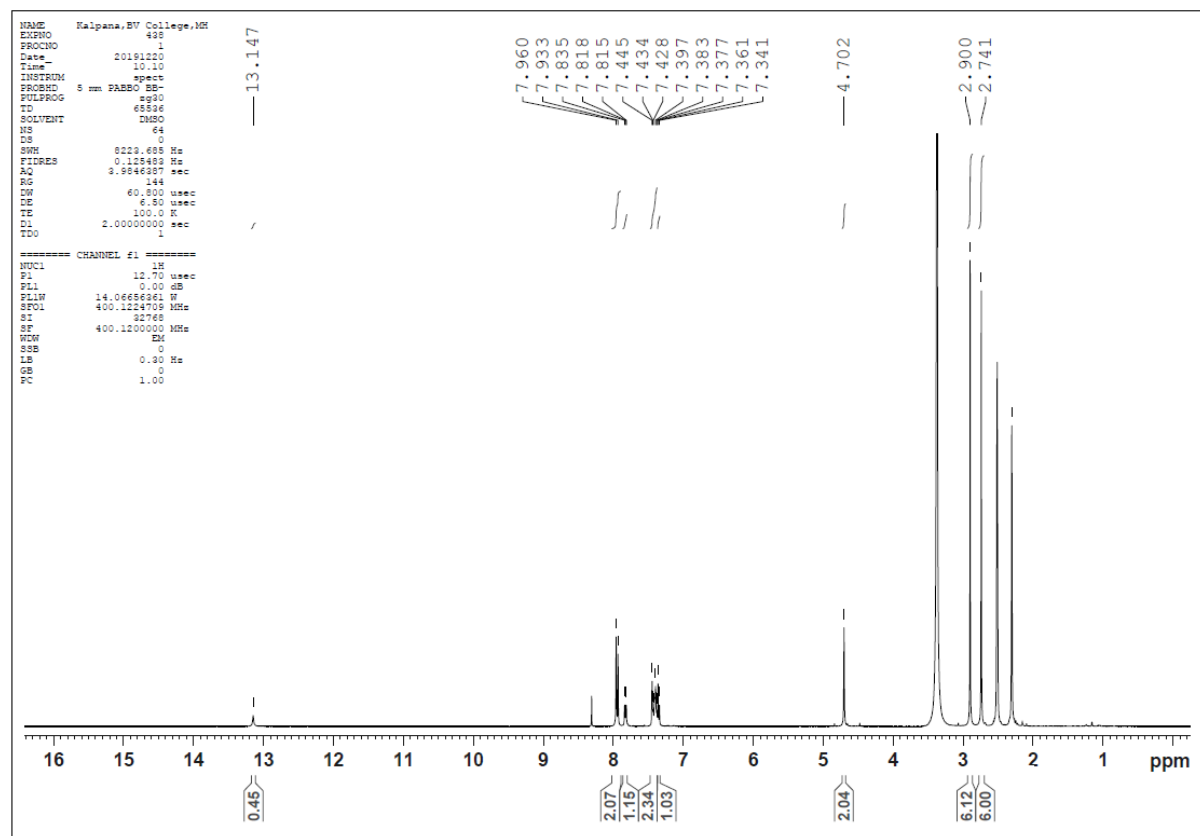

### 3. 13C-NMR



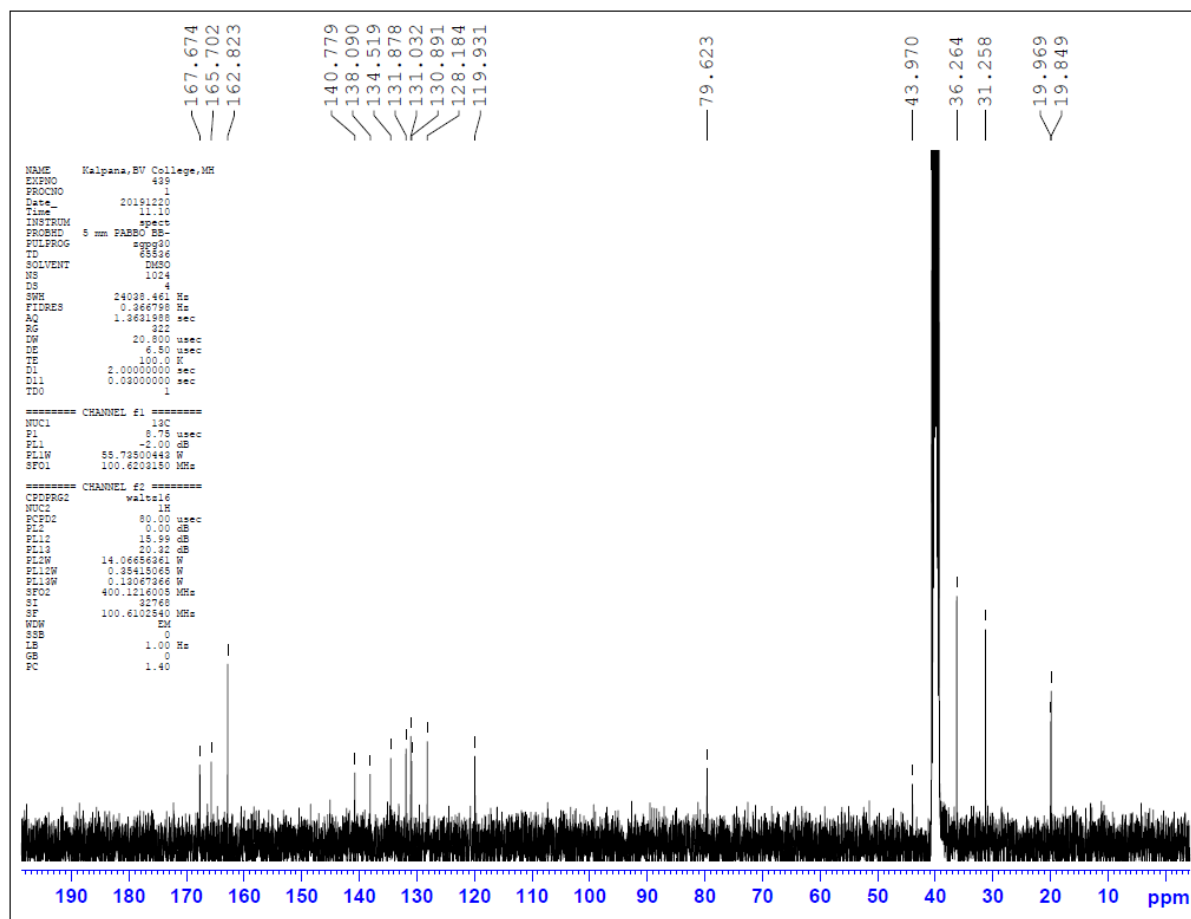

#### 4. HPLC

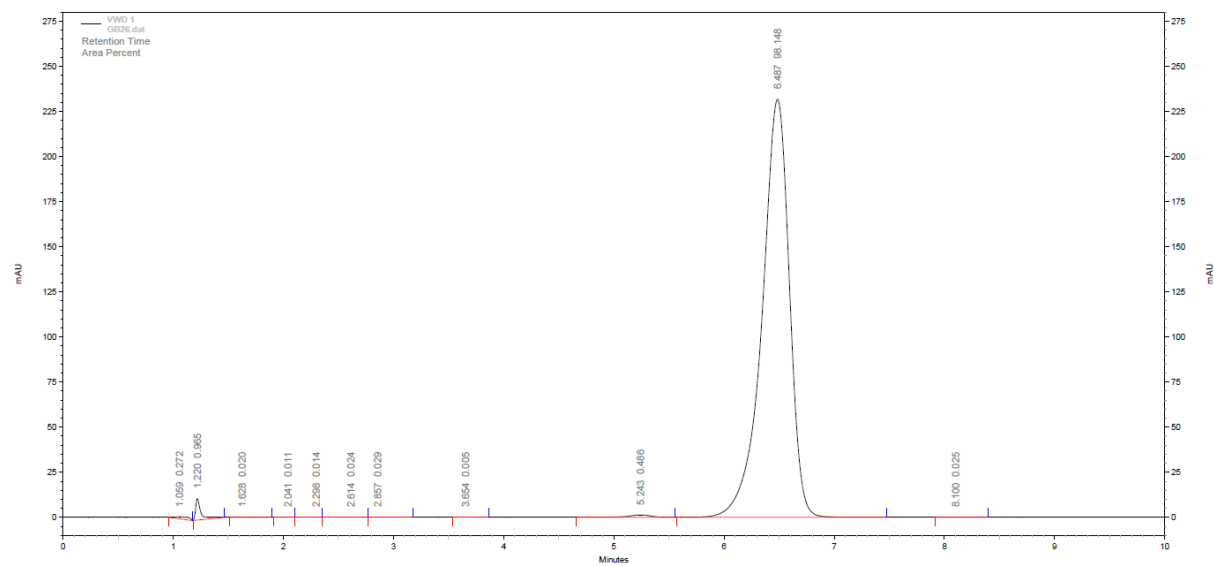

## 5. Mass

MS Spectrum

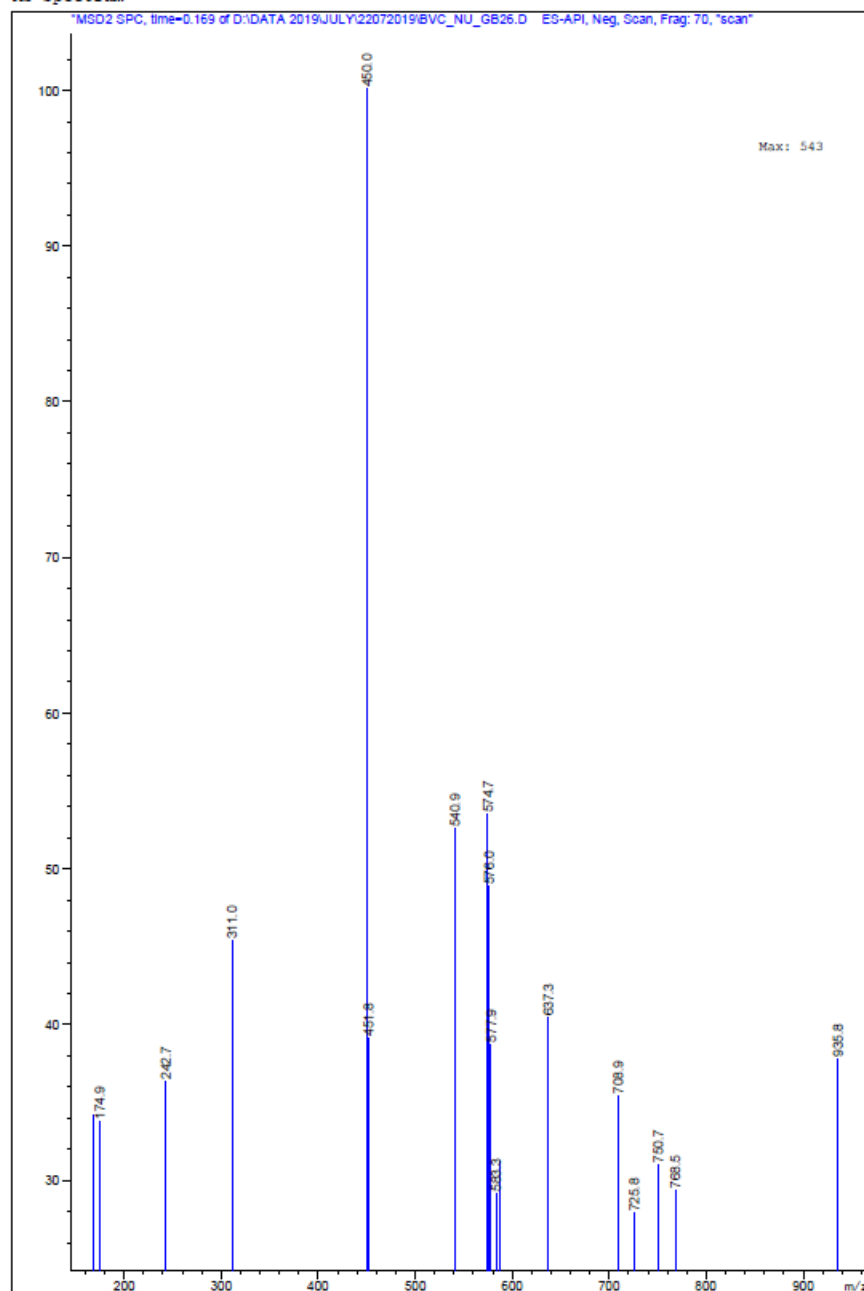

**N-(4-methoxybenzo[d]thiazol-2-yl)-2-(5-(4-methylbenzylidene)-2,4-dioxothiazolidin-3-yl)acetamide (GB27)**

**1. FTIR**

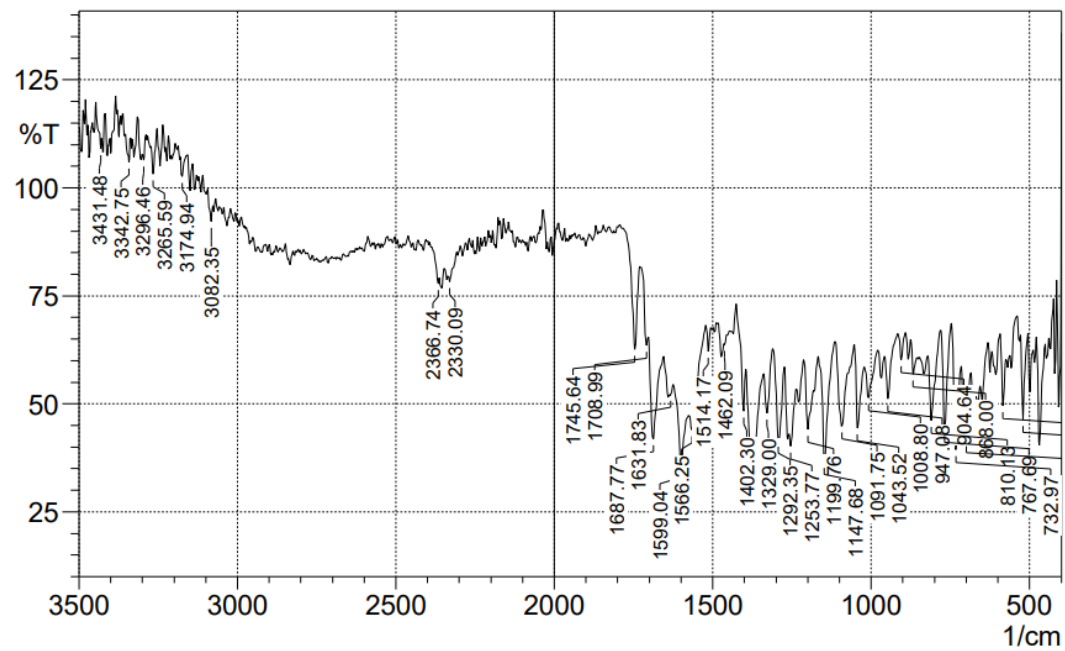

**2. <sup>1</sup>H-NMR**

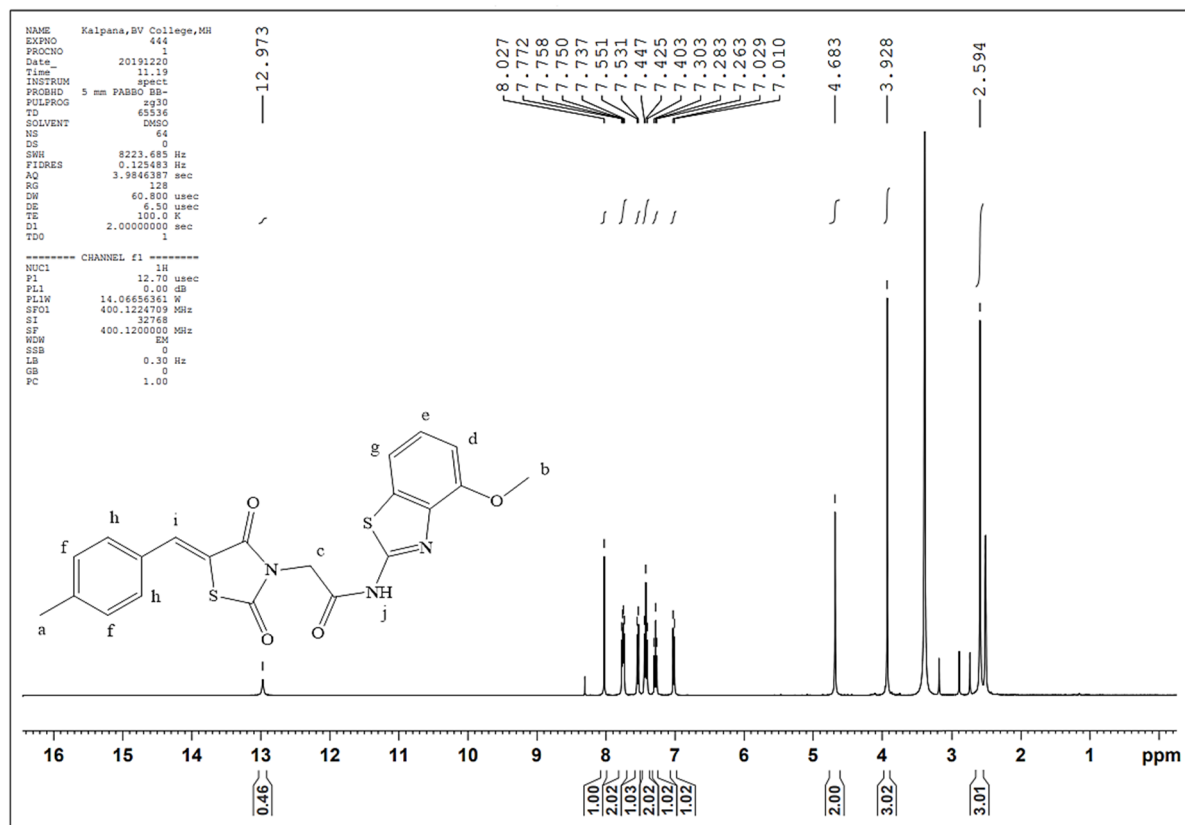

### 3. <sup>13</sup>C-NMR

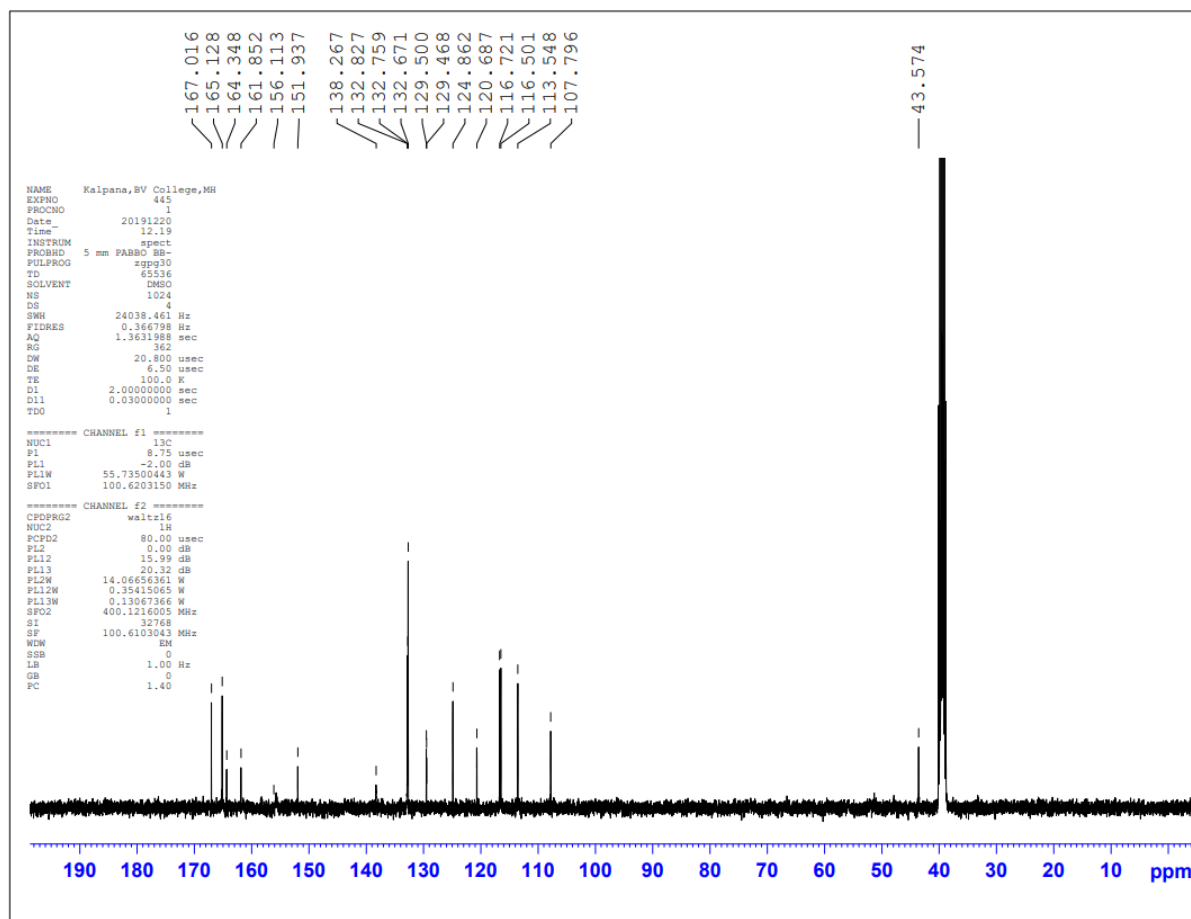

#### 4. HPLC Analysis

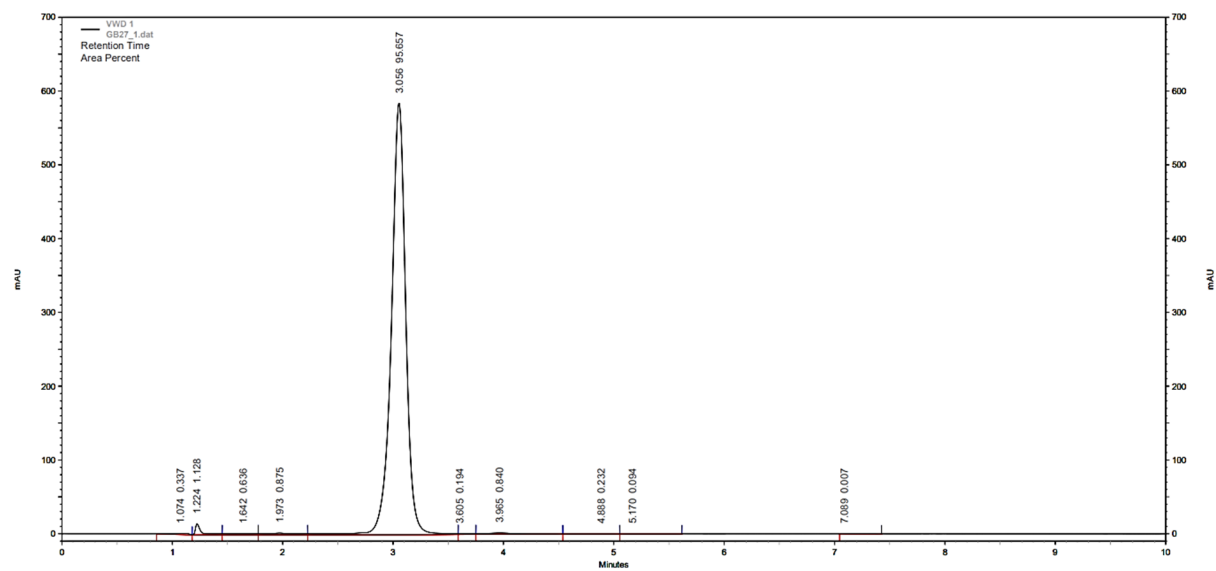

## 5. Mass Spectrometry

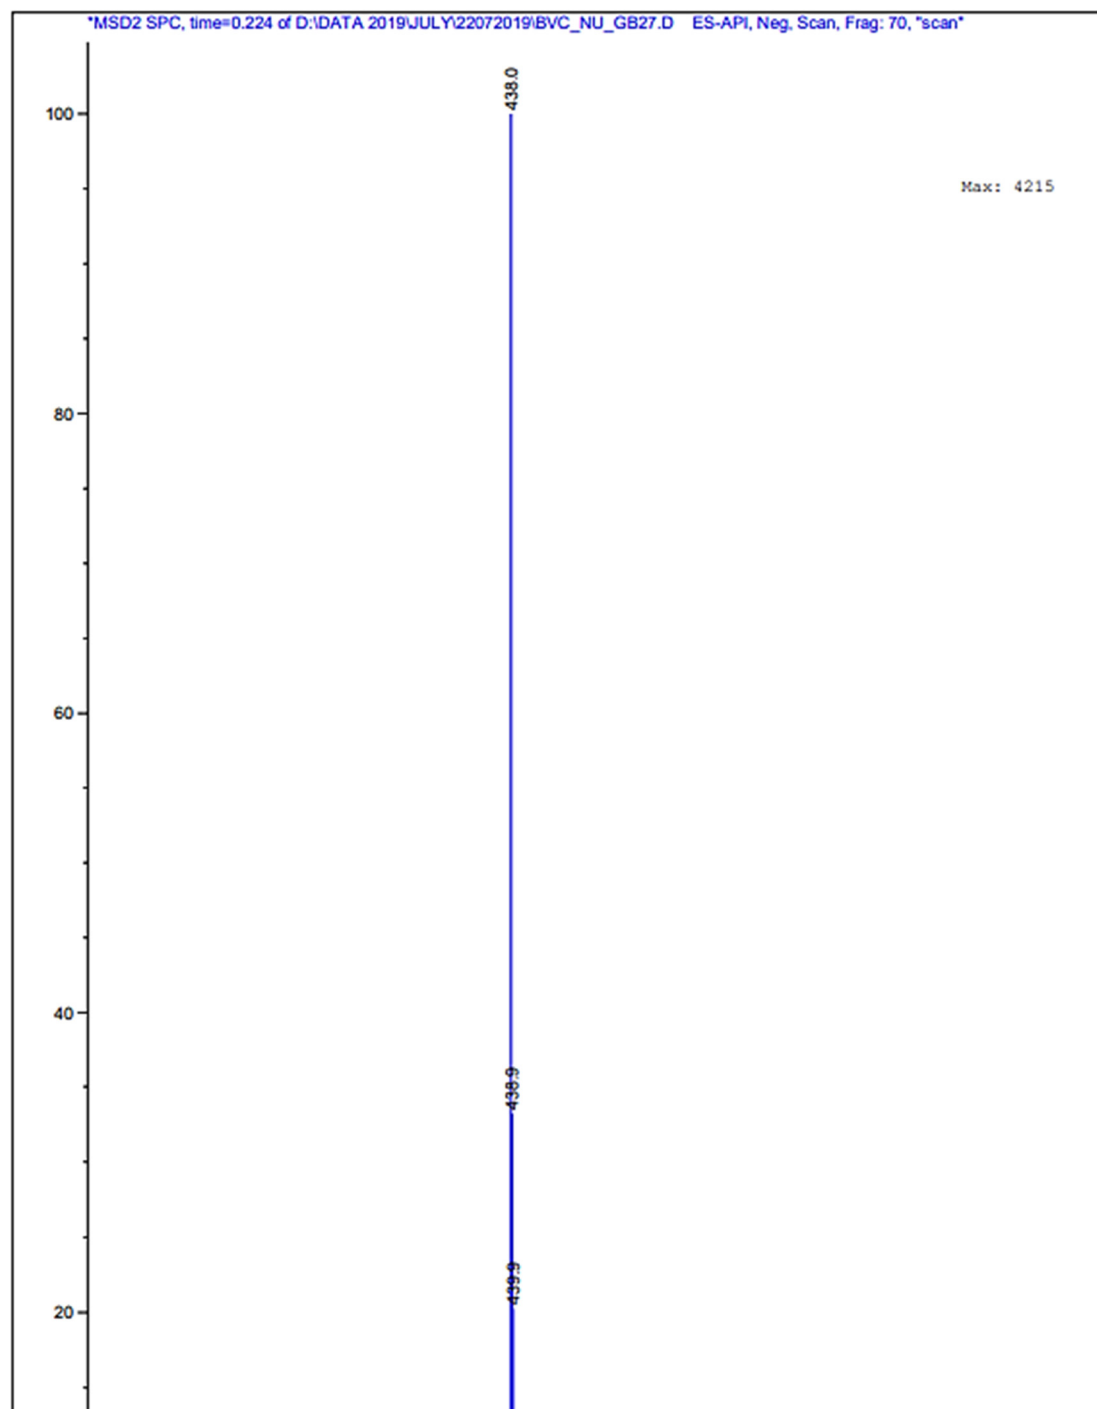



## 6. UV

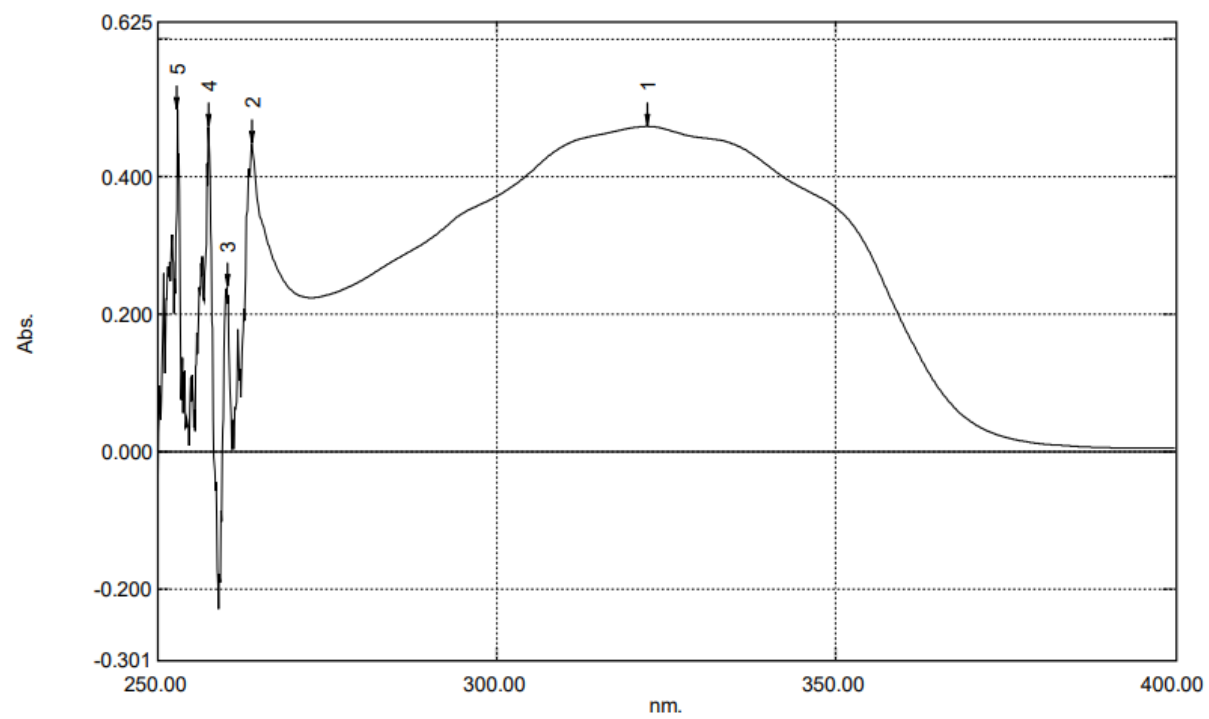

## 2-(5-benzylidene-2,4-dioxothiazolidin-3-yl)-N-(4-methylbenzo[d]thiazol-2-yl)acetamide (GB28)

### 1. FTIR

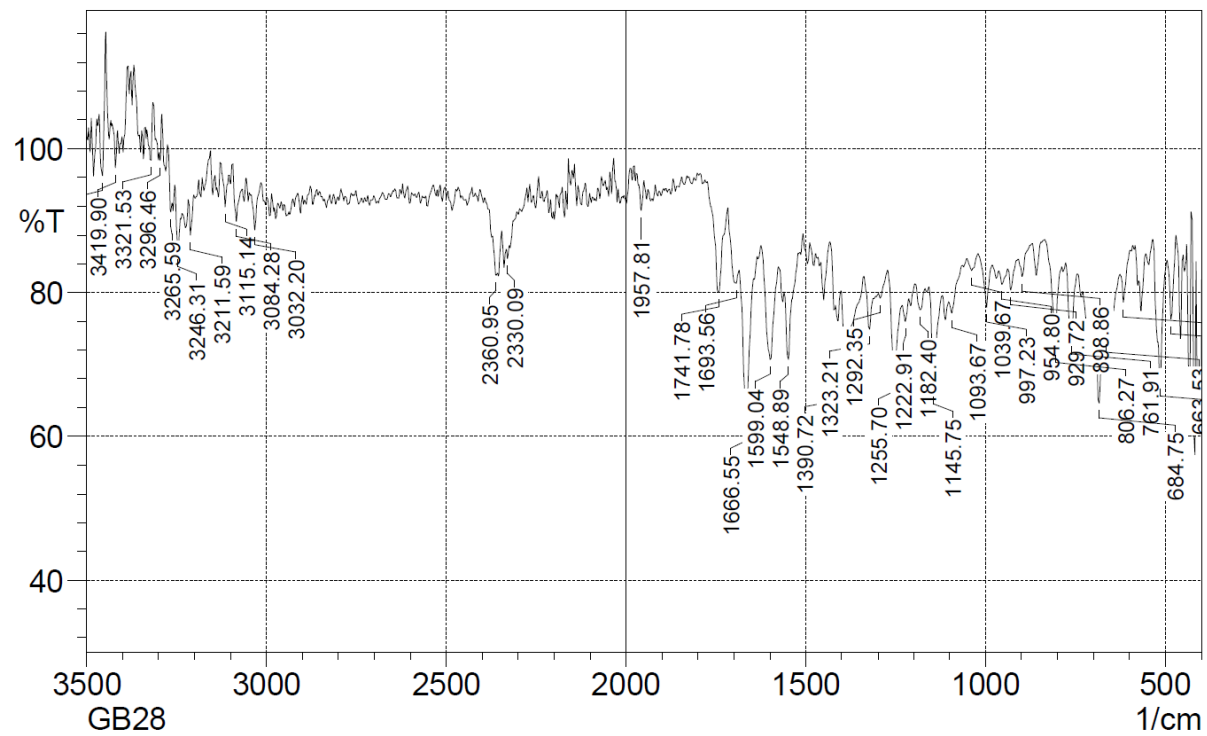

### 2. $^1\text{H}$ -NMR



### 3. <sup>13</sup>C-NMR



#### 4. HPLC

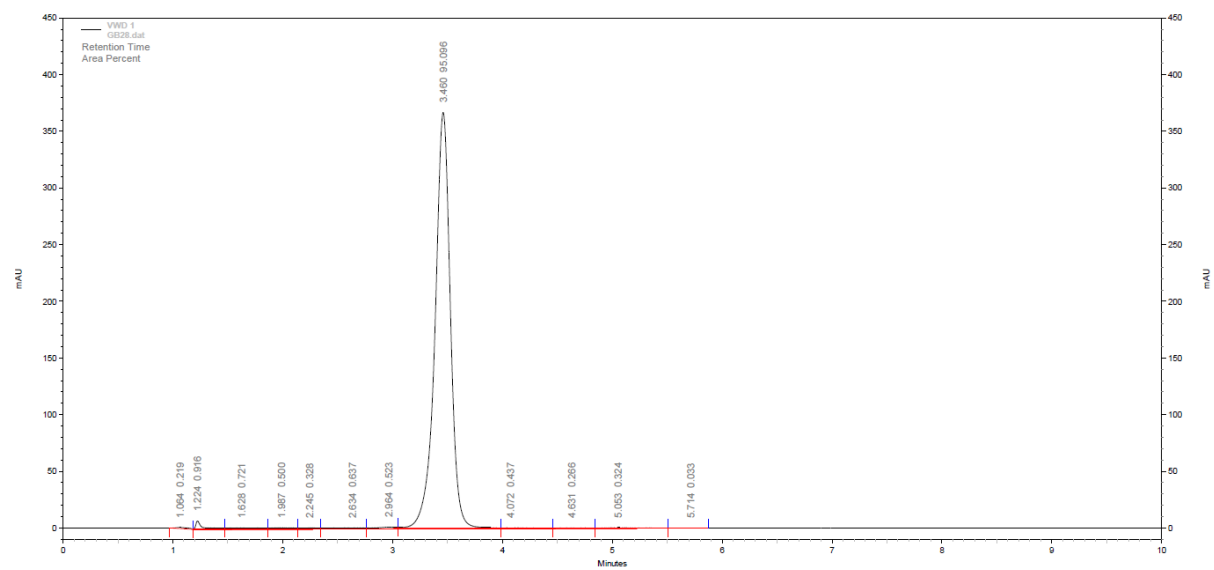

## 5. Mass

MS Spectrum

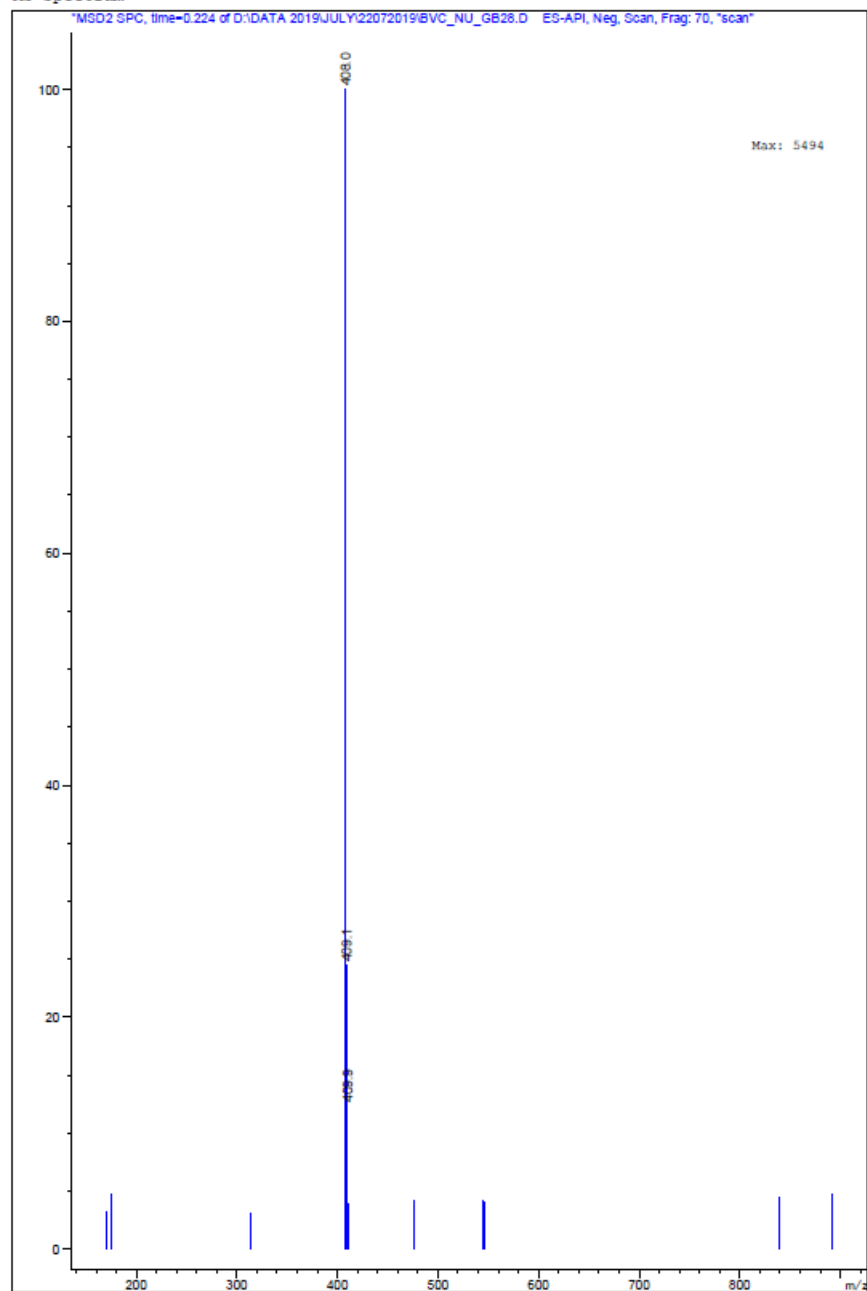

**N-(4,6-difluorobenzo[d]thiazol-2-yl)-2-(5-(2,4-difluorobenzylidene)-2,4-dioxothiazolidin-3-yl)acetamide (GB29)**

**1. FTIR**

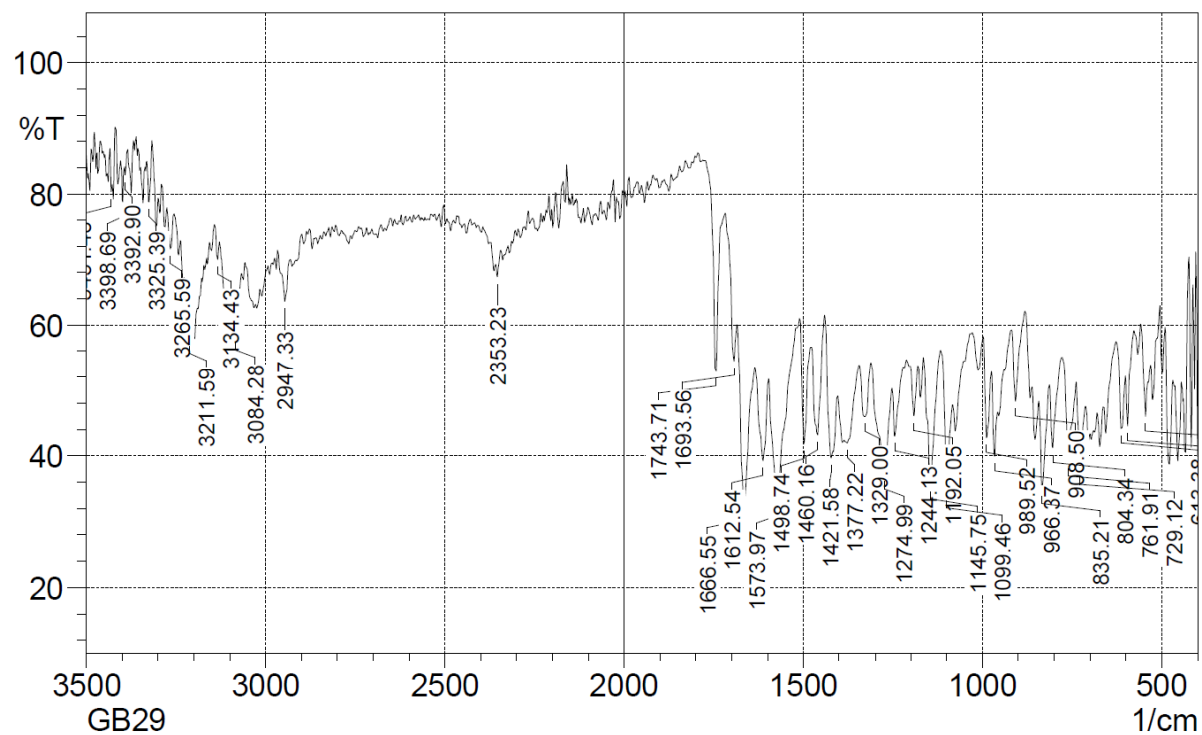

**2.  $^1\text{H}$ NMR**

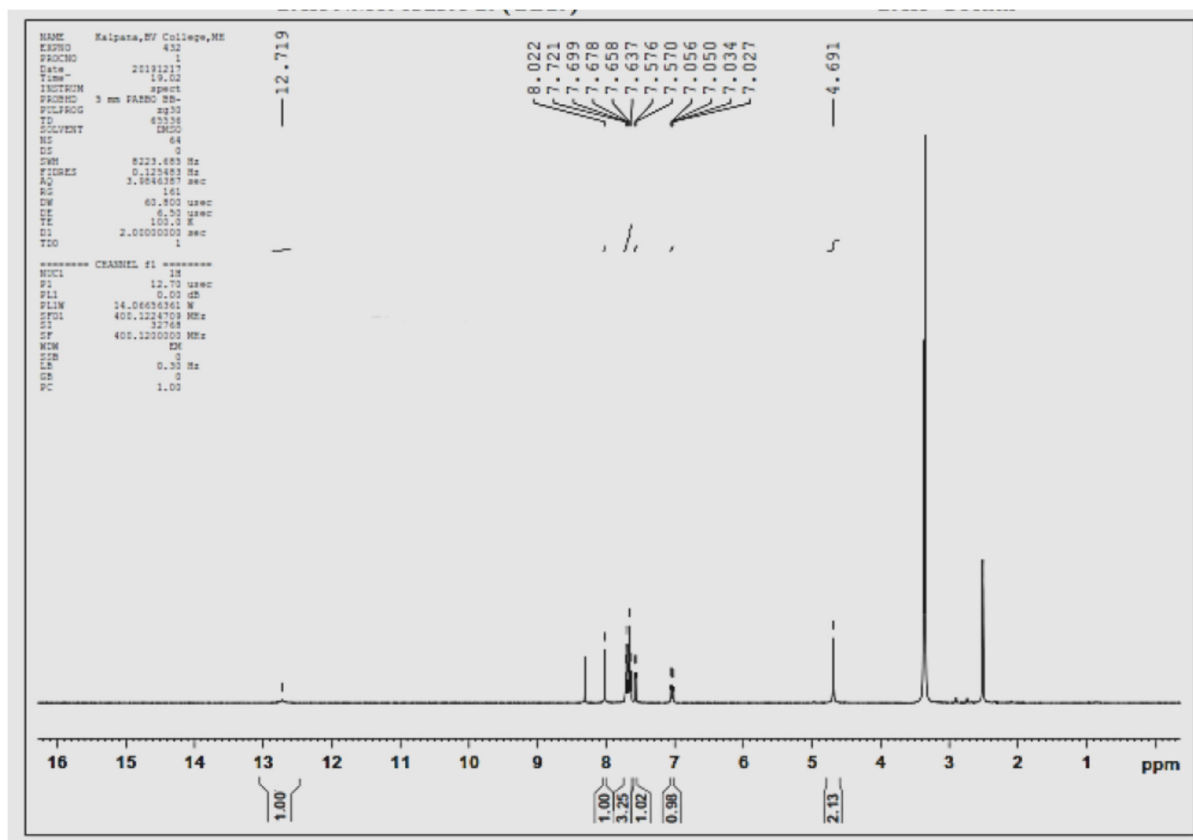

### 3. $^{13}\text{C}$ NMR



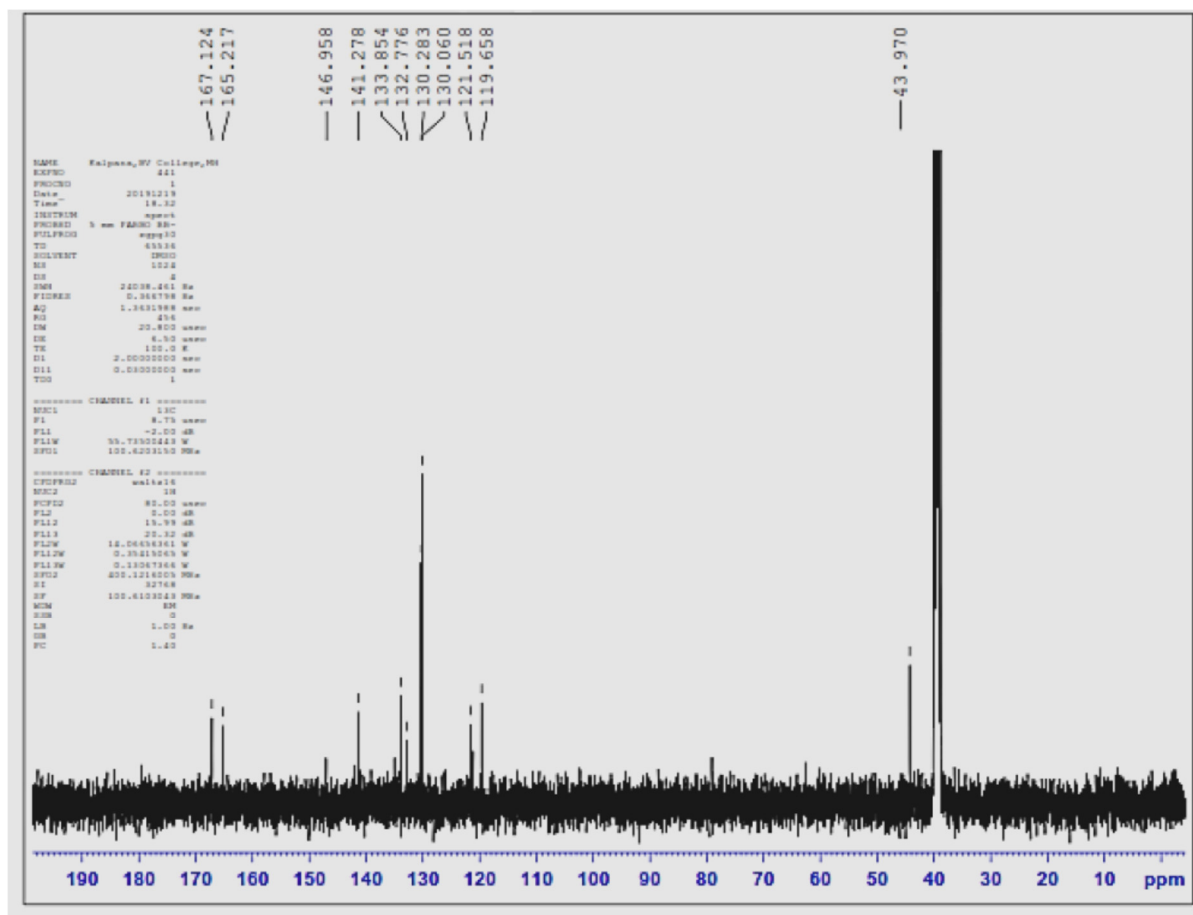

#### 4. HPLC

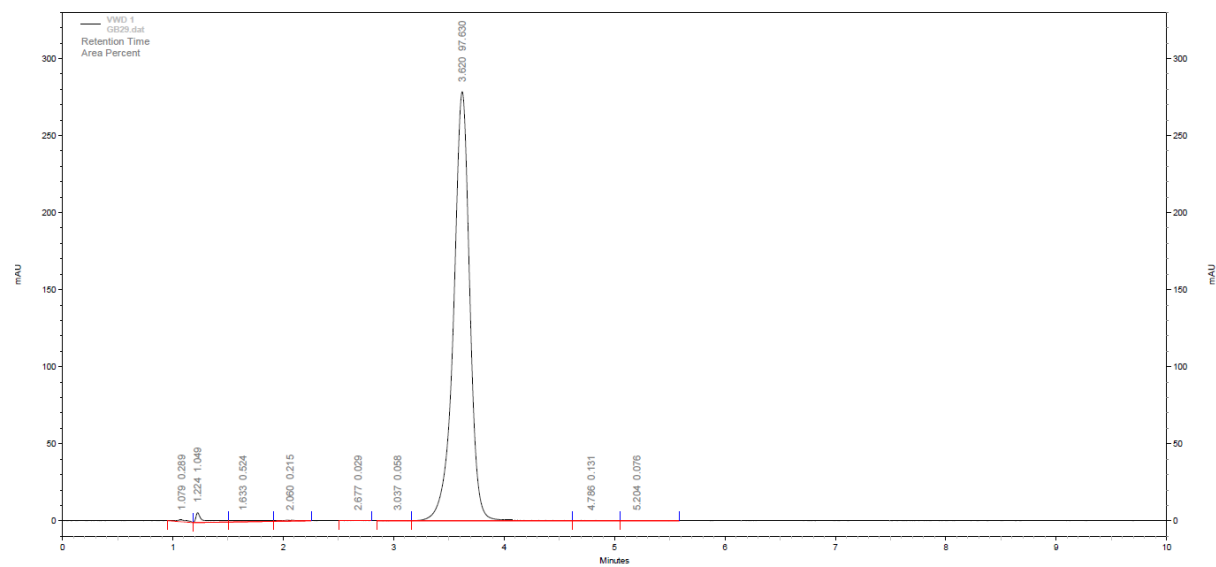

## 5. Mass

MS Spectrum

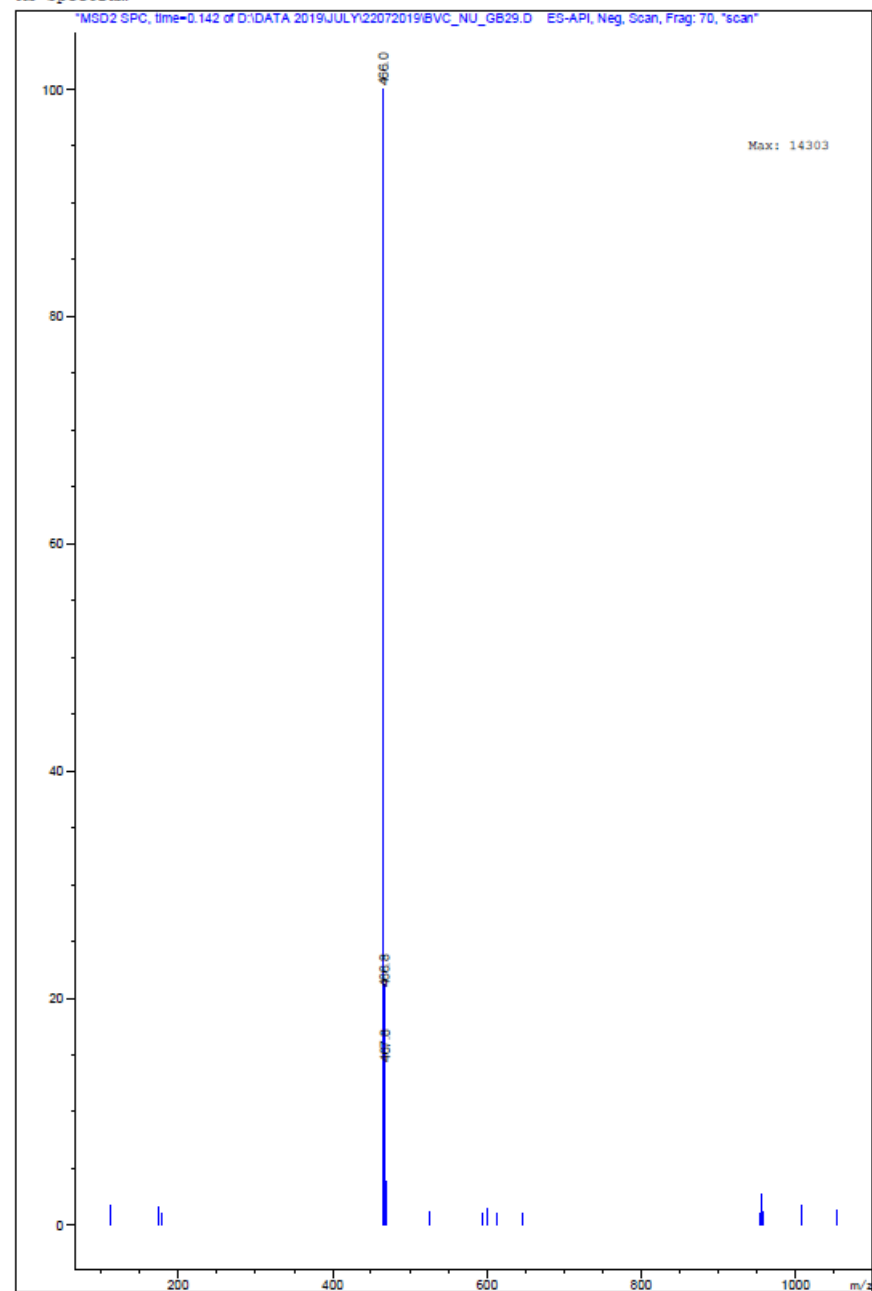

**2-(5-benzylidene-2,4-dioxothiazolidin-3-yl)-N-(4-fluorobenzo[d]thiazol-2-yl)acetamide (GB30)**

**1. FTIR**

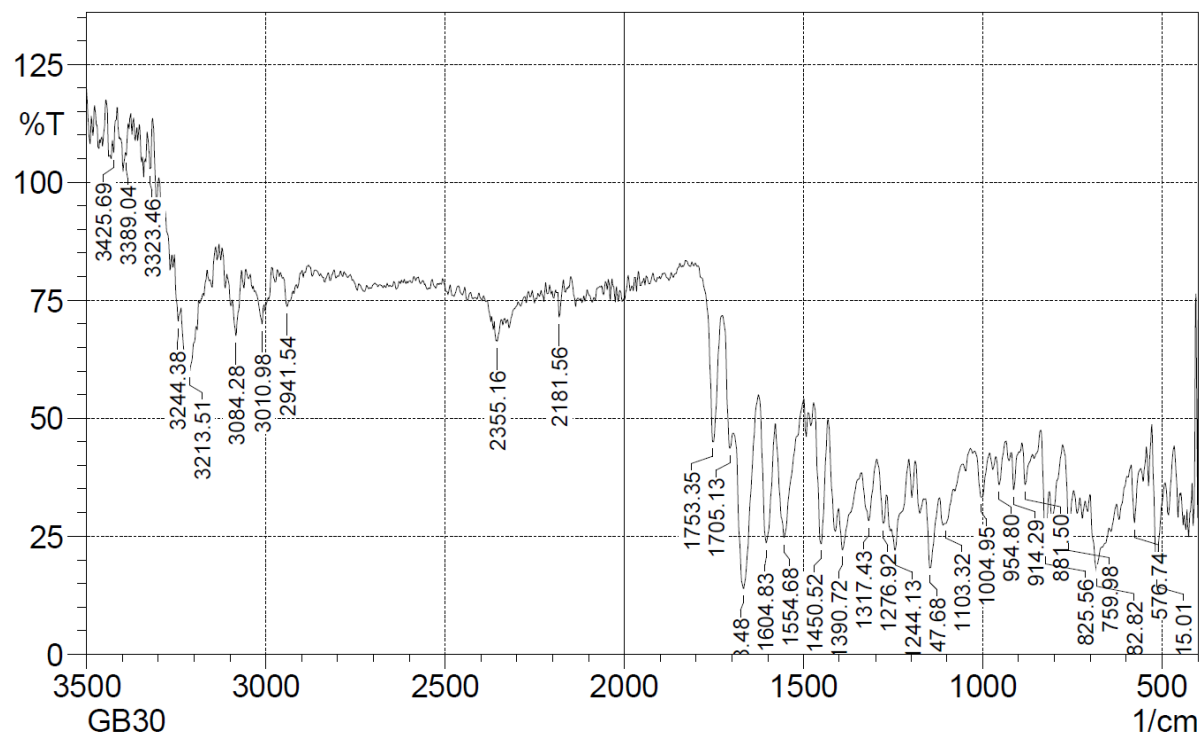

**2. 1H-NMR**

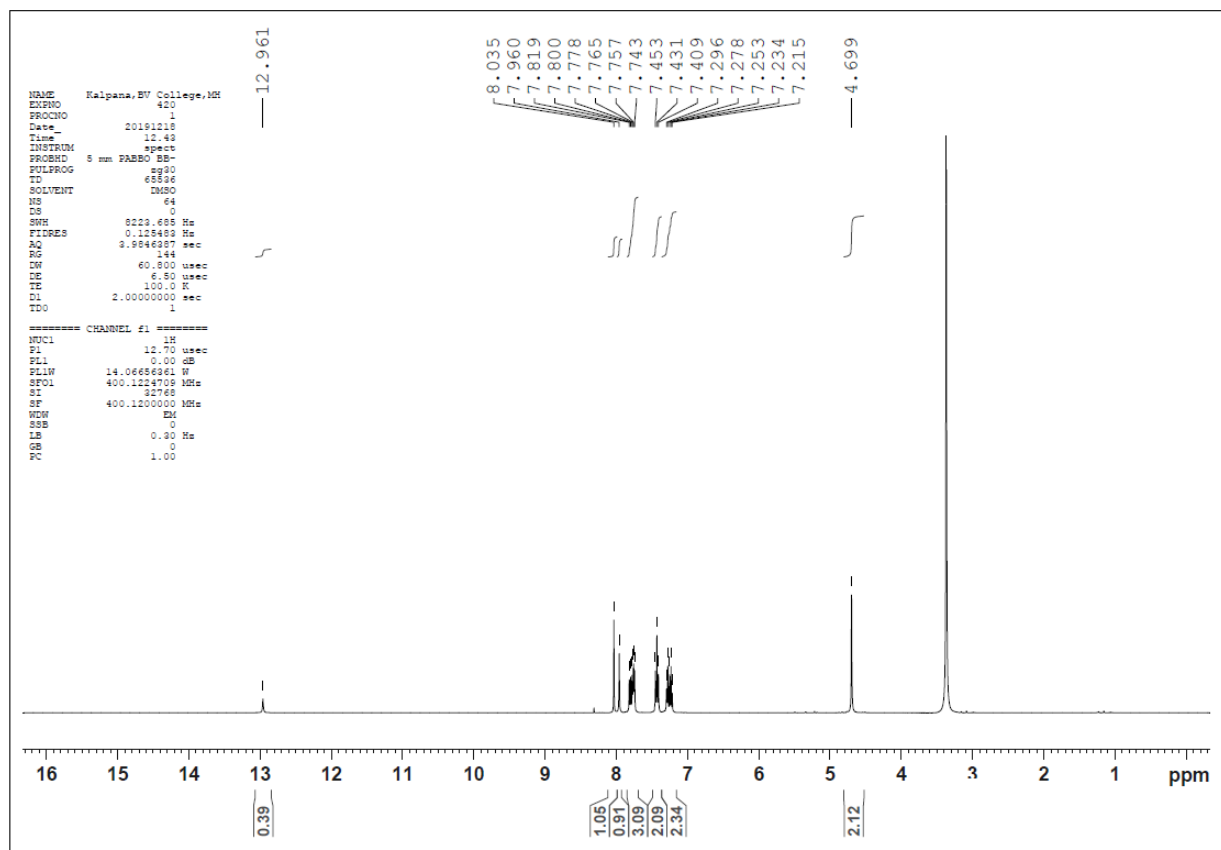

### 3. <sup>13</sup>C-NMR

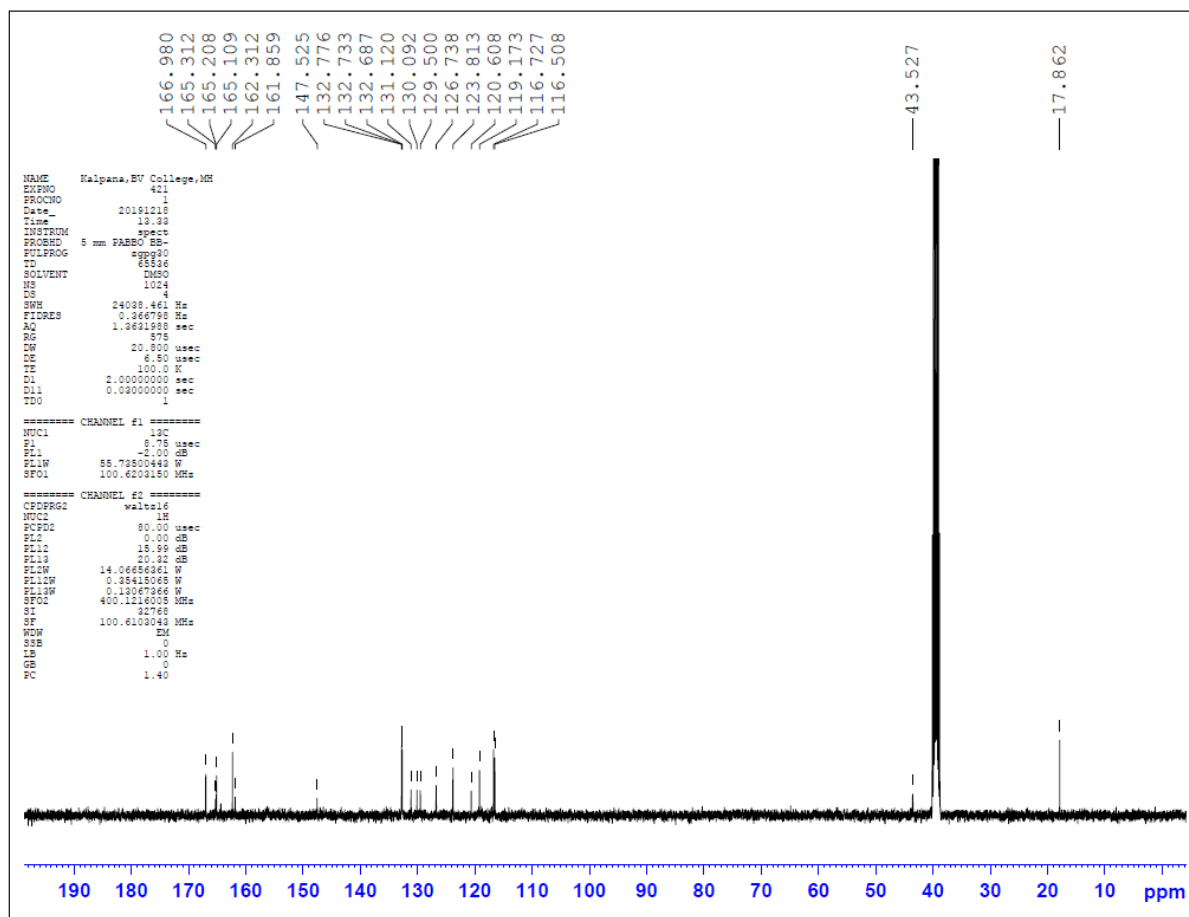

#### 4. HPLC

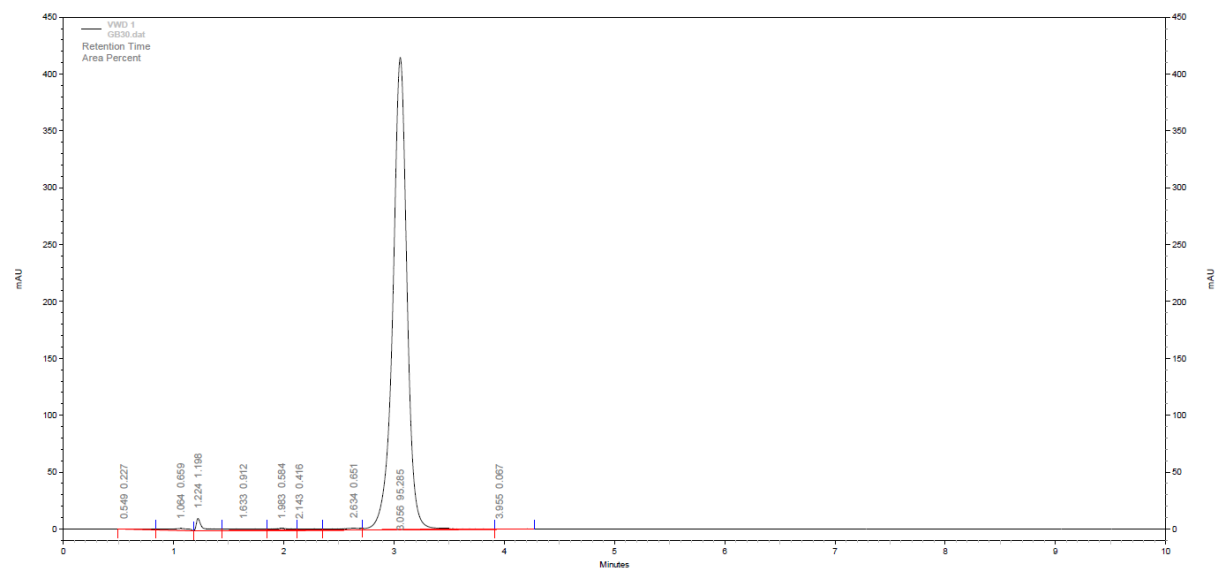

## 5. Mass

MS Spectrum

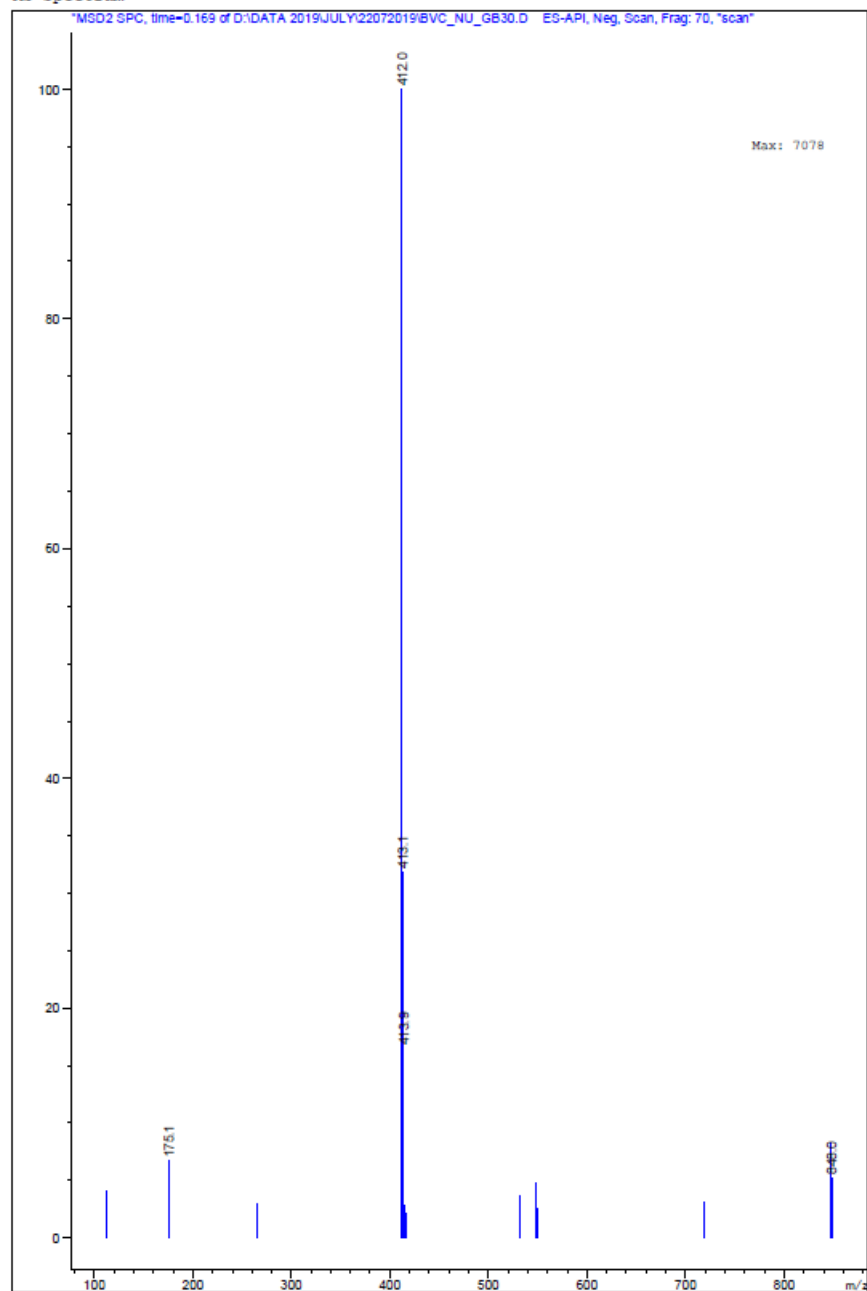



**2-(5-(4-bromobenzylidene)-2,4-dioxothiazolidin-3-yl)-N-(6-methylbenzo[d]thiazol-2-yl)acetamide (GB31)**

**1. FTIR**

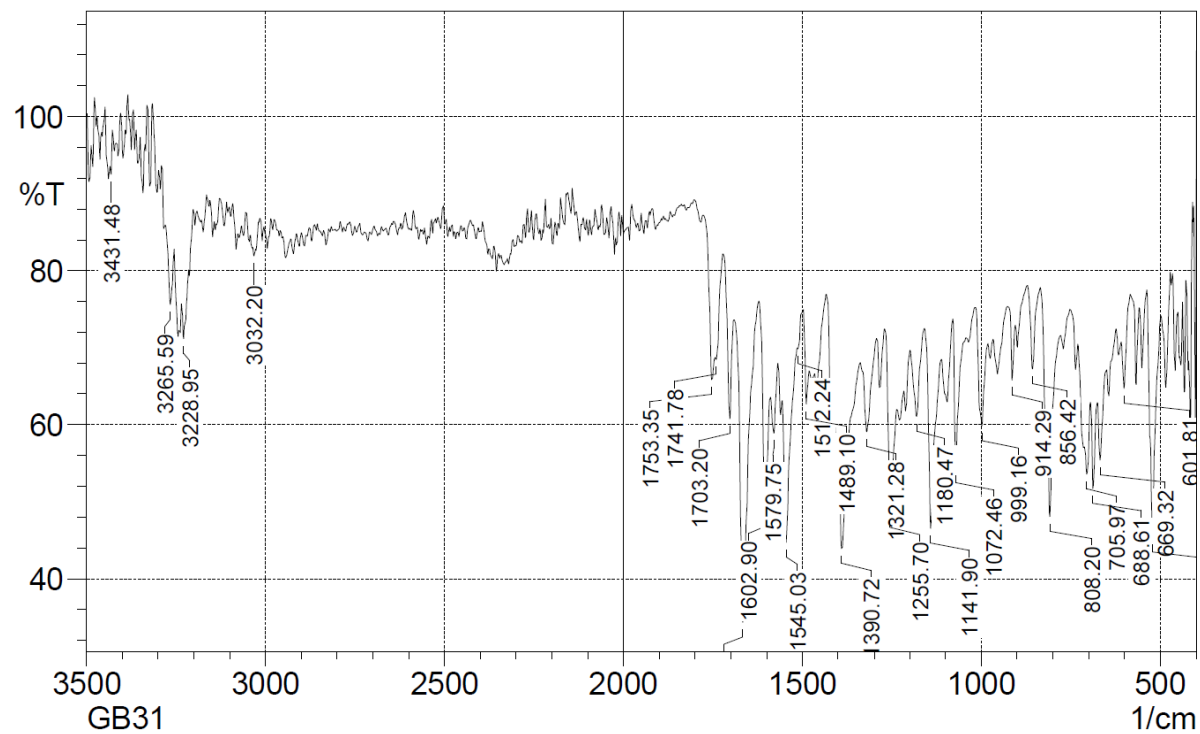

**2.  $^1\text{H}$ NMR**

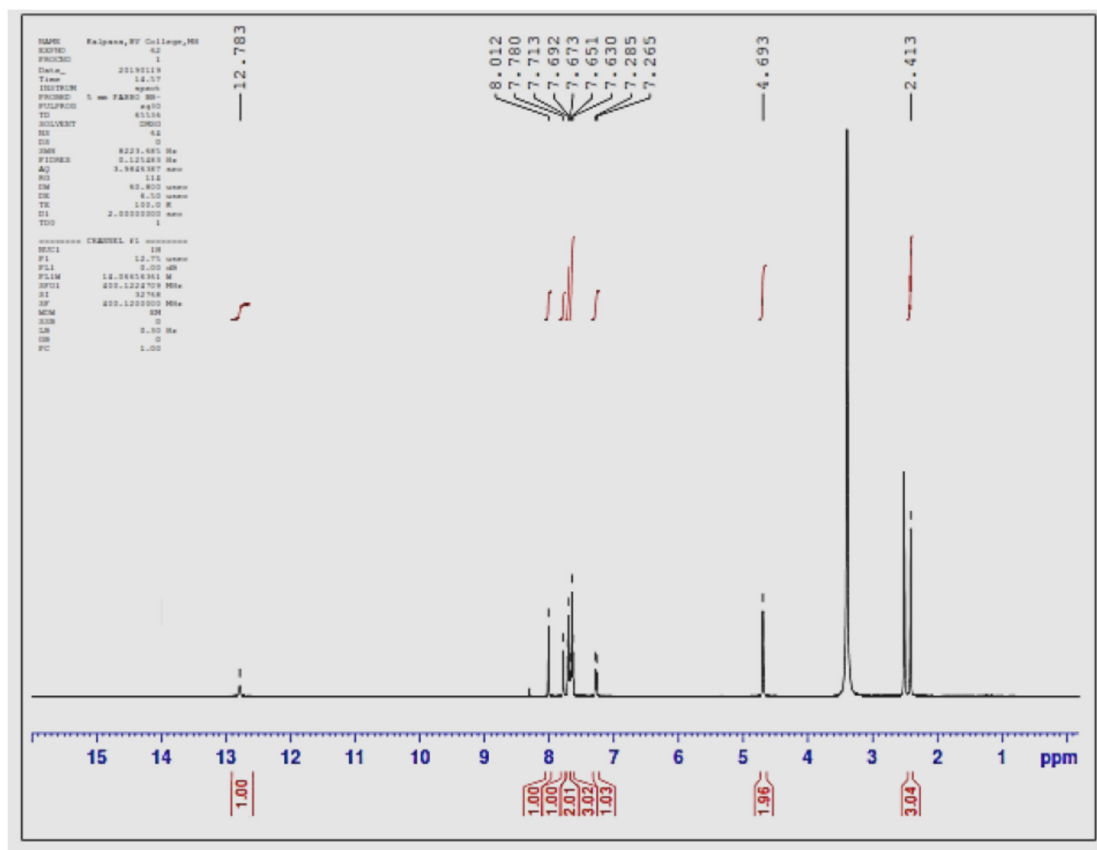

### 3. <sup>13</sup>CNMR

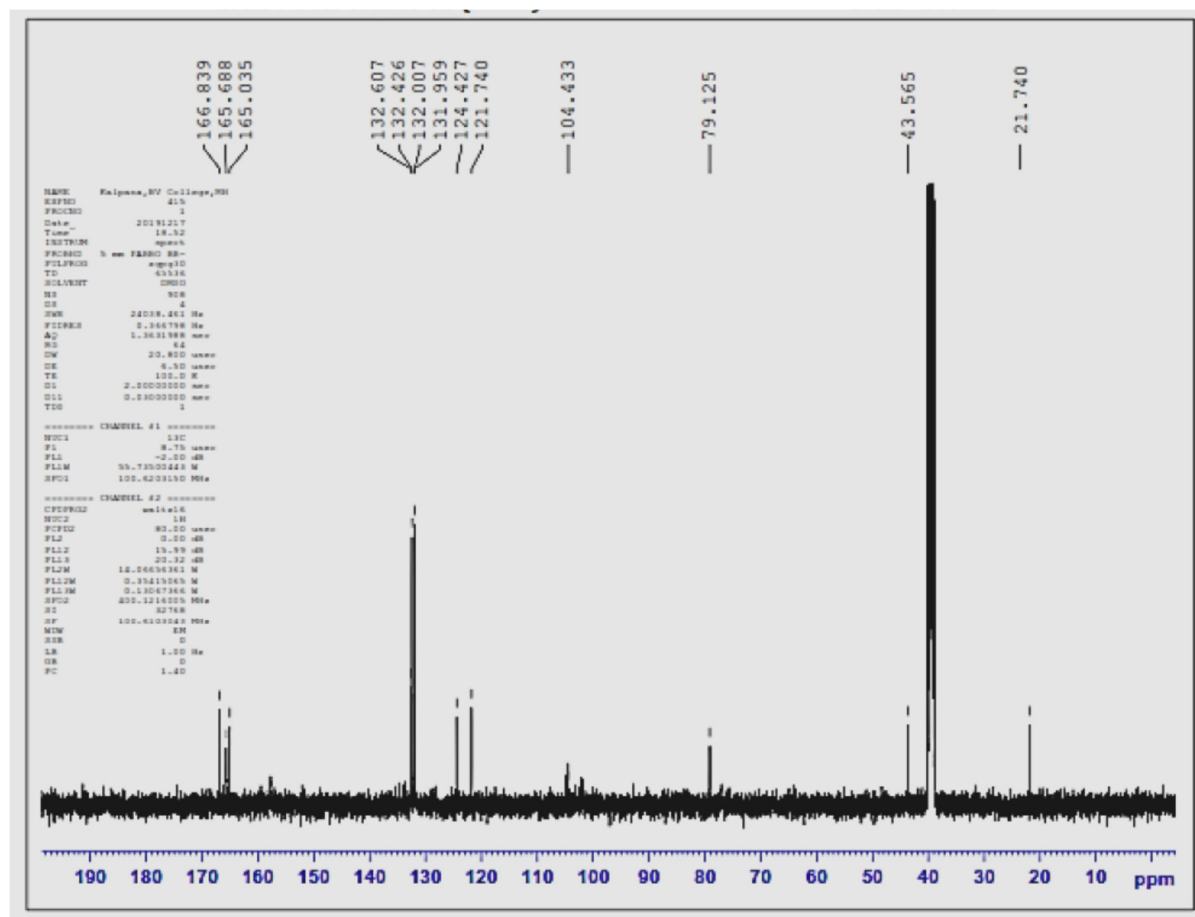

#### 4. HPLC

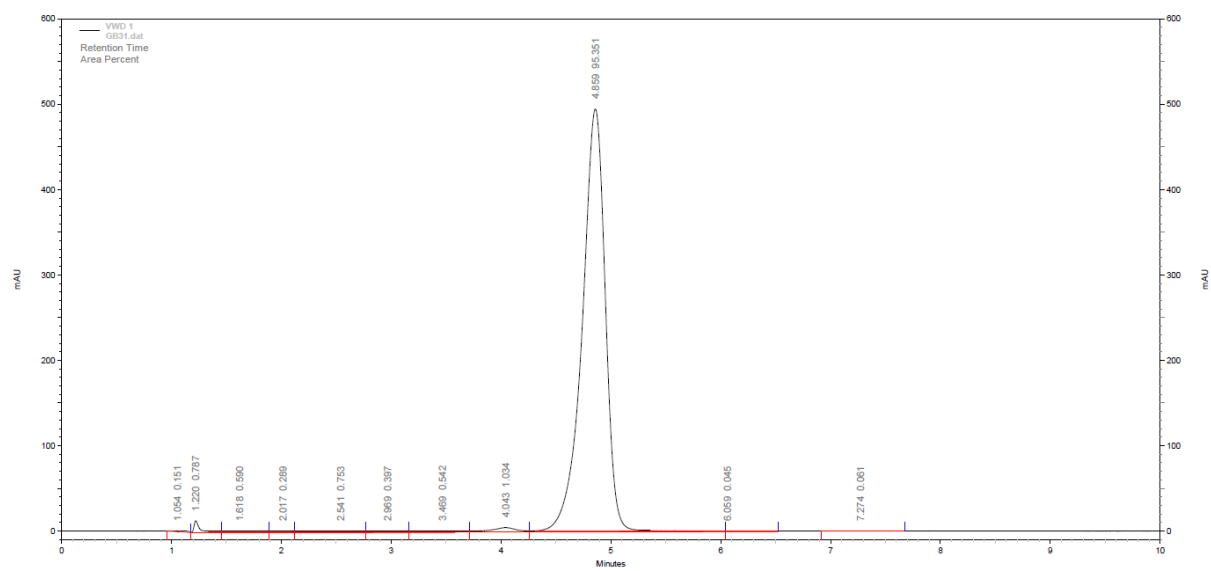

## 5. Mass

MS Spectrum

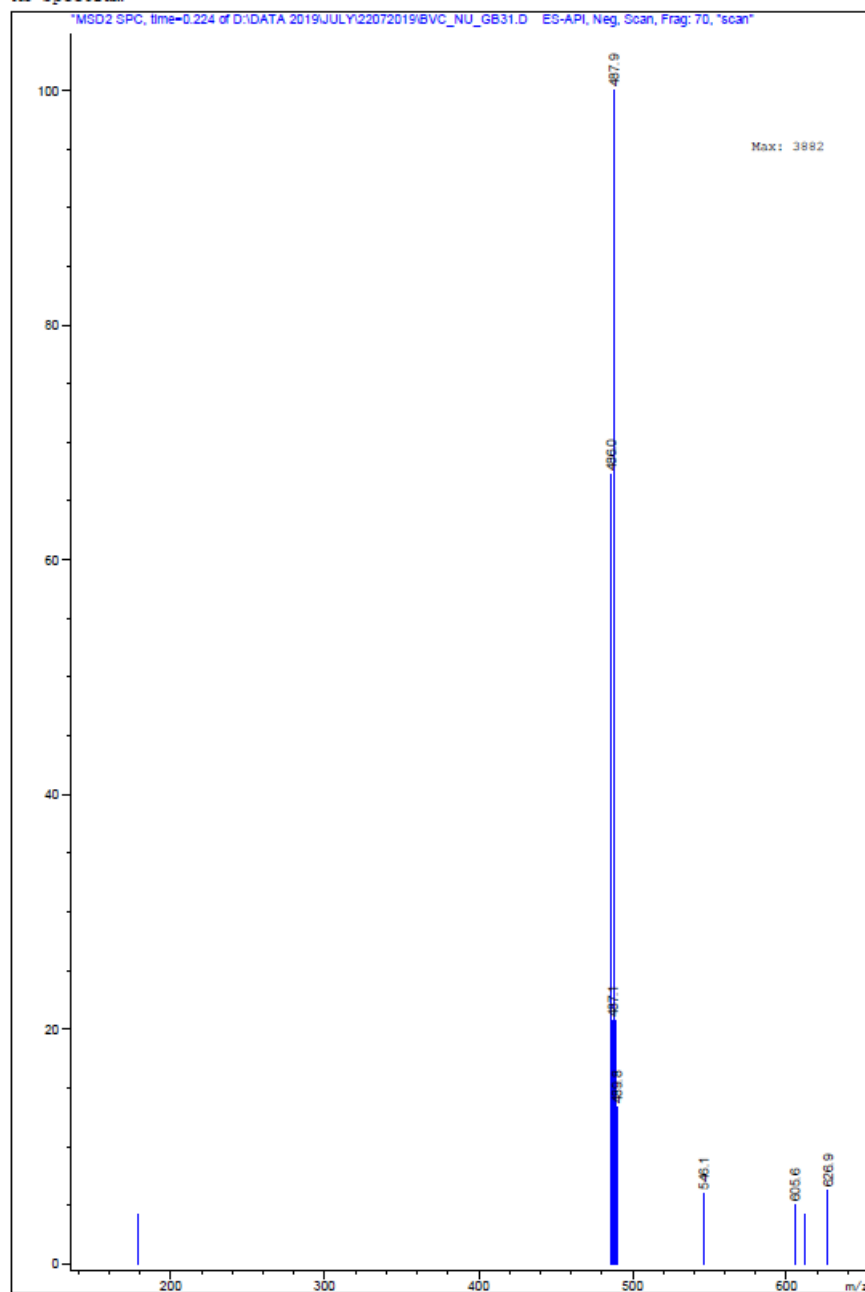

**N-(6-fluorobenzo[d]thiazol-2-yl)-2-(5-(4-methylbenzylidene)-2,4-dioxothiazolidin-3-yl)acetamide (GB32)**

**1. FTIR**

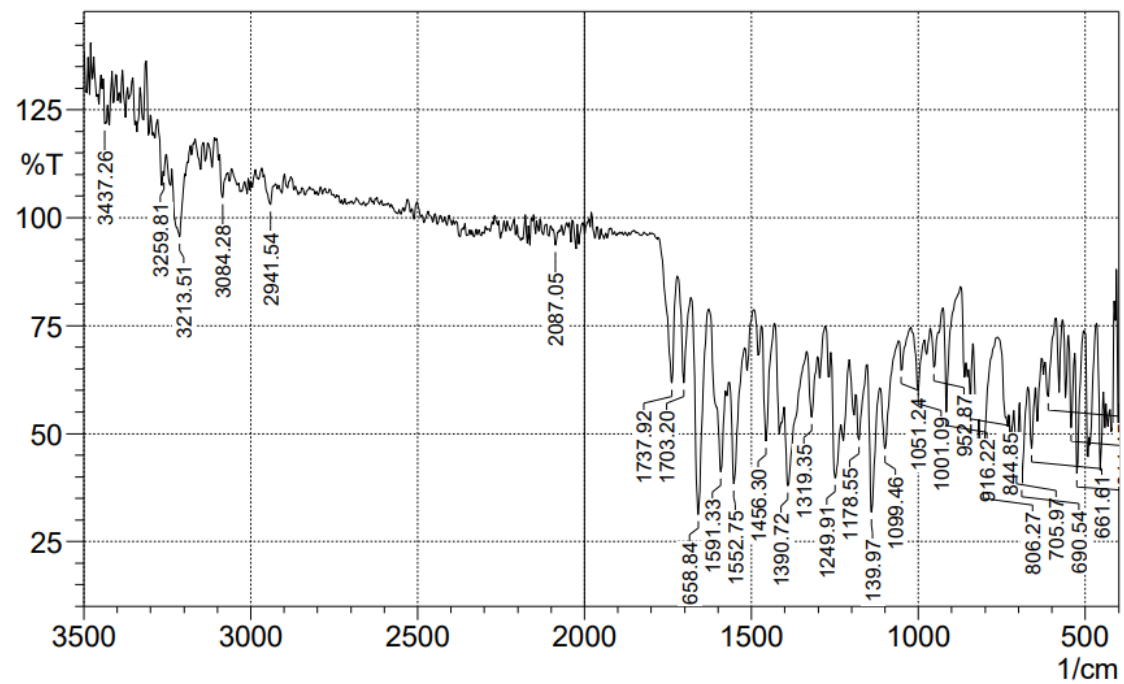

**2. <sup>1</sup>H-NMR**

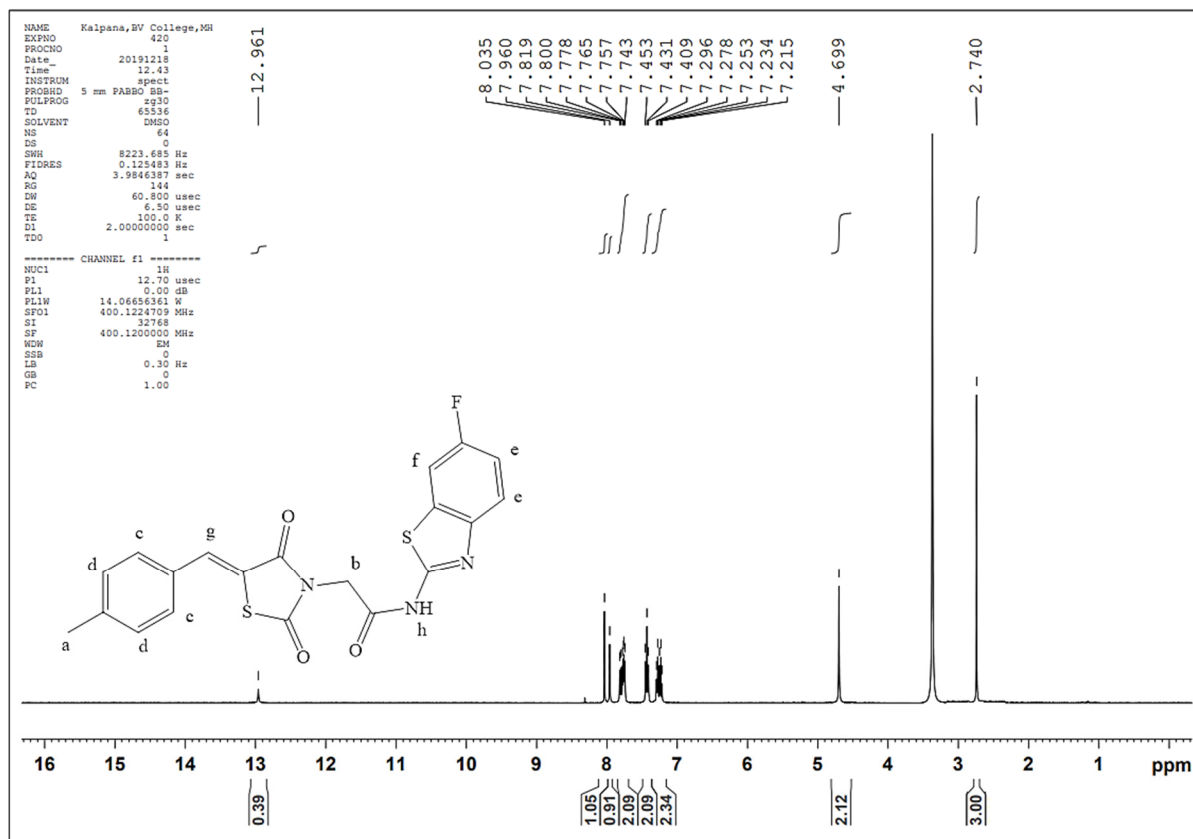

### 3. <sup>13</sup>C-NMR

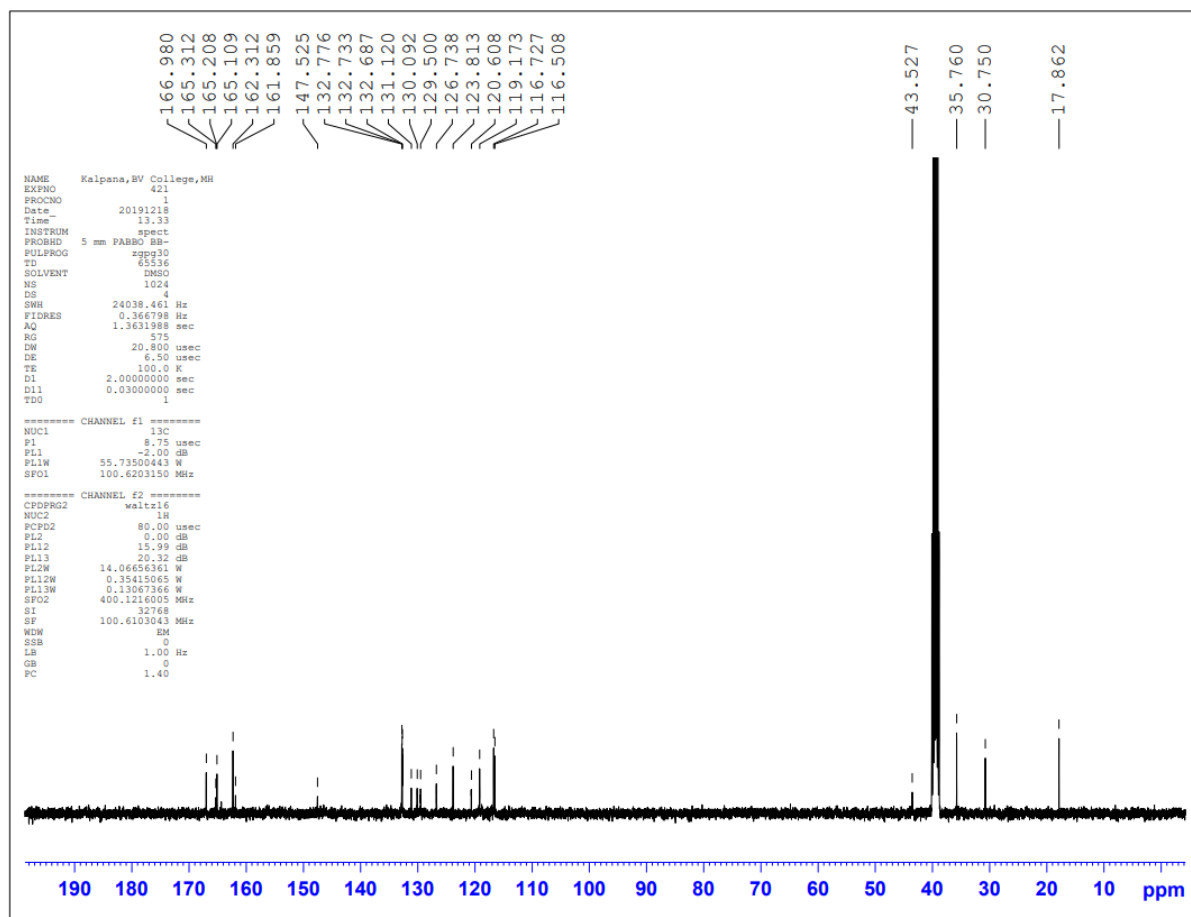

#### 4. HPLC Analysis



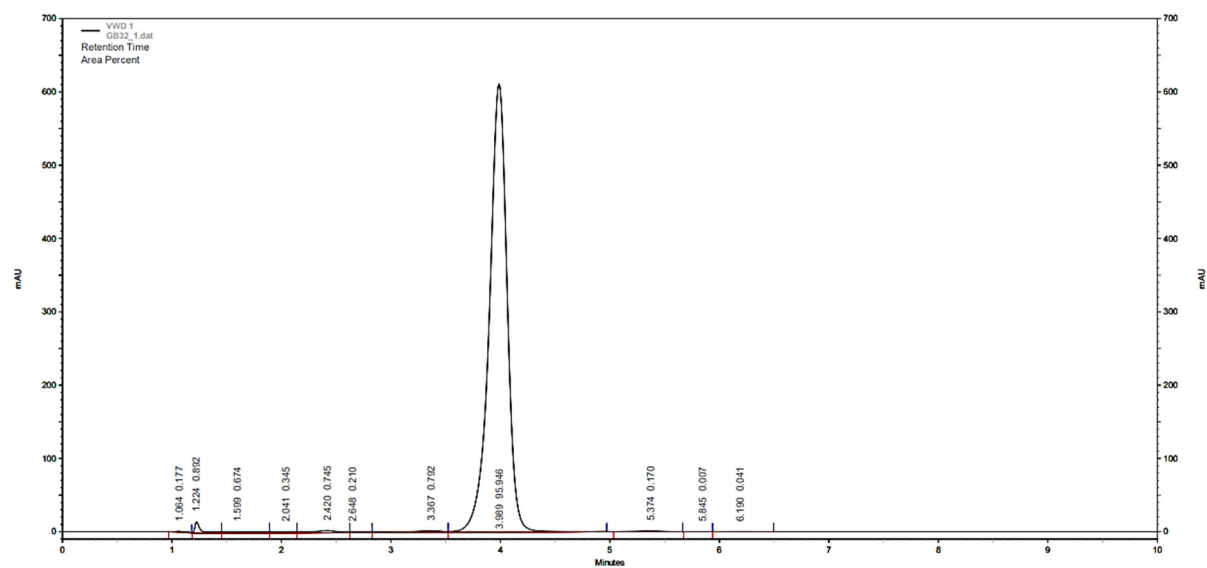

## 5. Mass Spectrometry

\*MSD2 SPC, time=0.224 of D:\DATA 2019\JULY22072019\BVC\_NU\_GB32.D ES-API, Neg. Scan, Frag: 70, "scan"

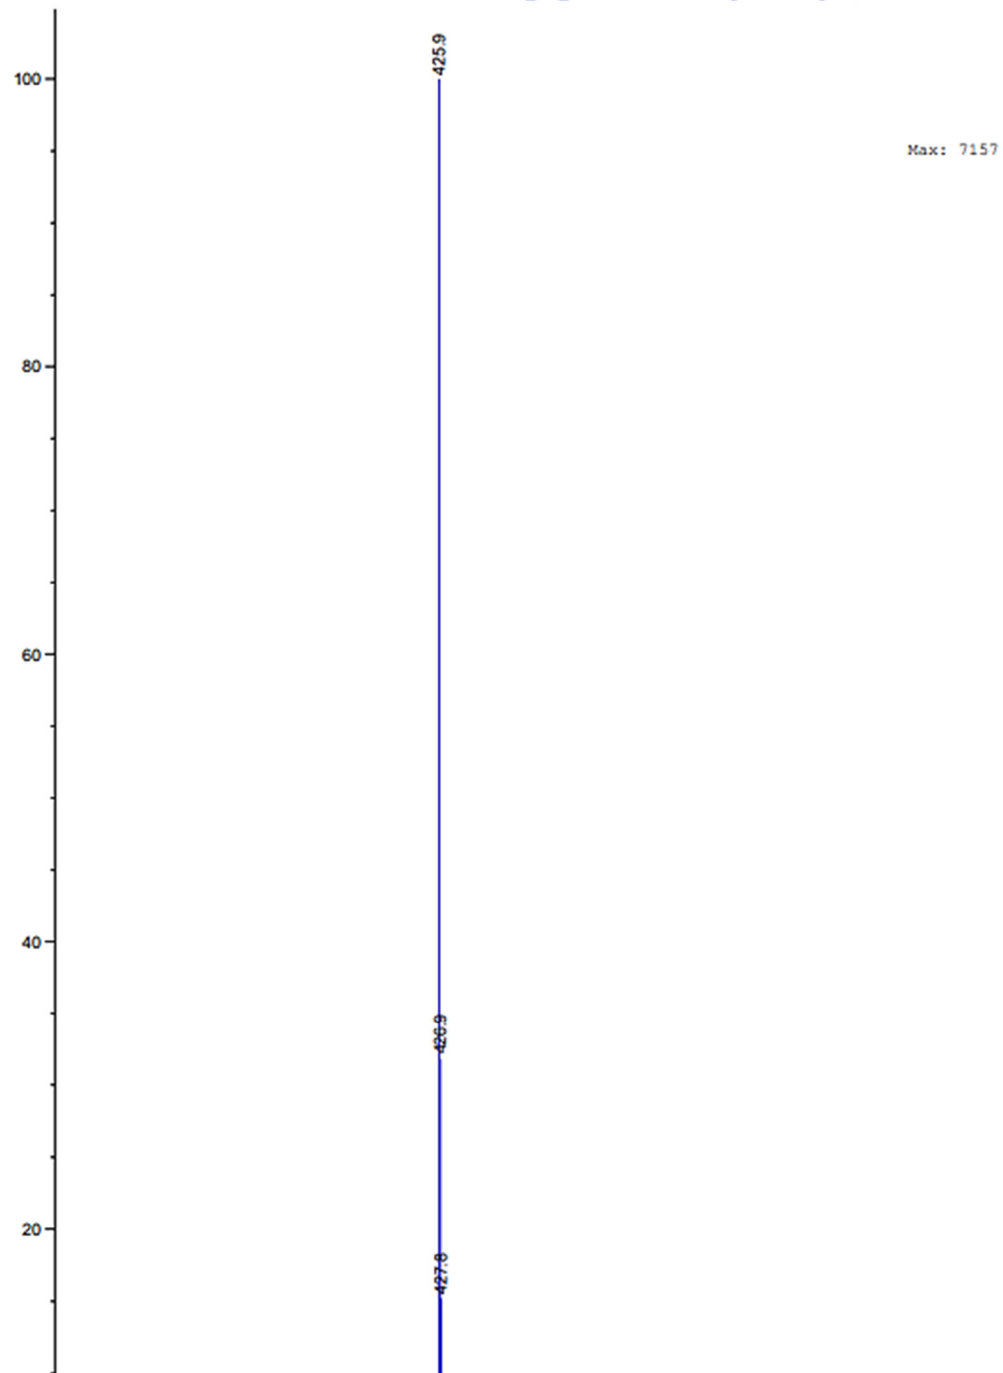

## 6. UV

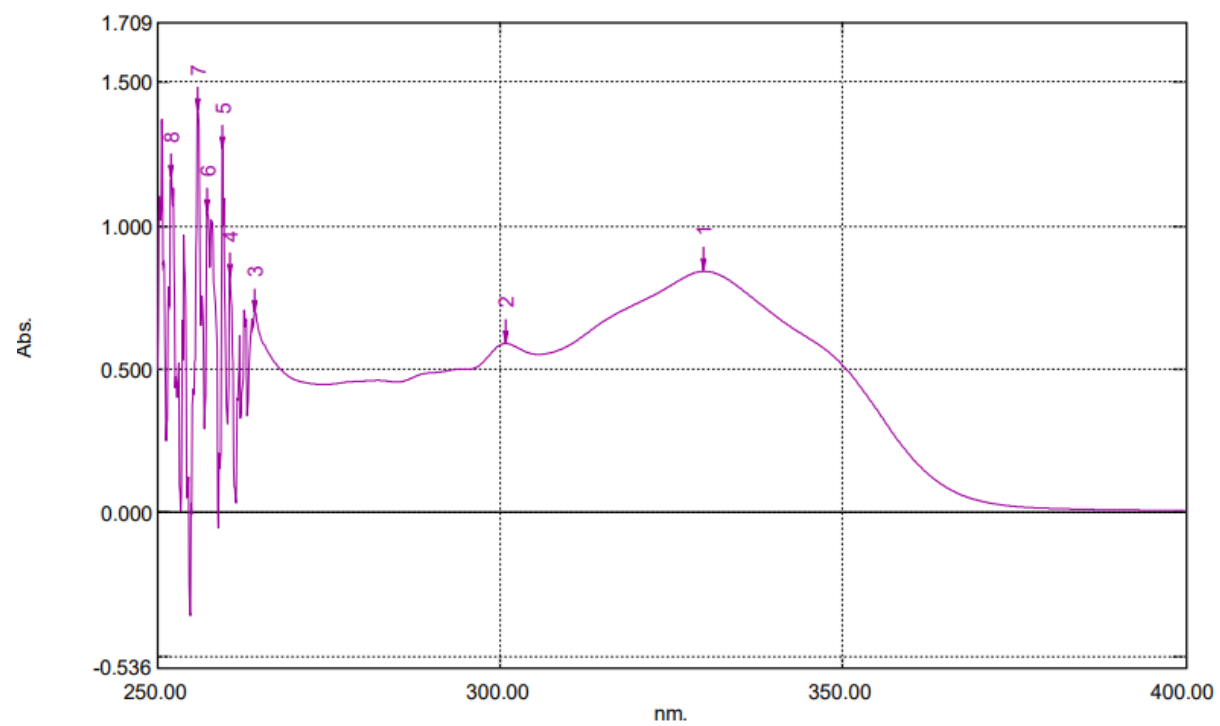

**2-(5-(4-chlorobenzylidene)-2,4-dioxothiazolidin-3-yl)-N-(6-fluorobenzo[d]thiazol-2-yl)acetamide (GB33)**

**1. FTIR**

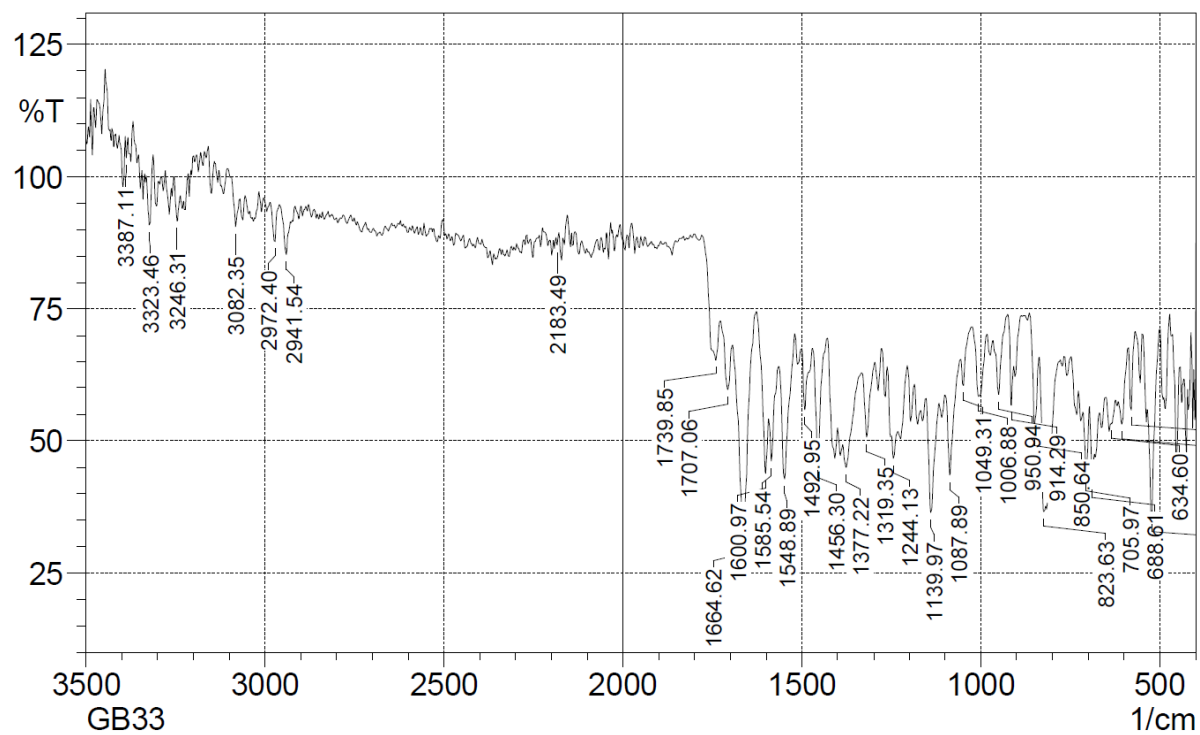

**2. <sup>1</sup>HNMR**

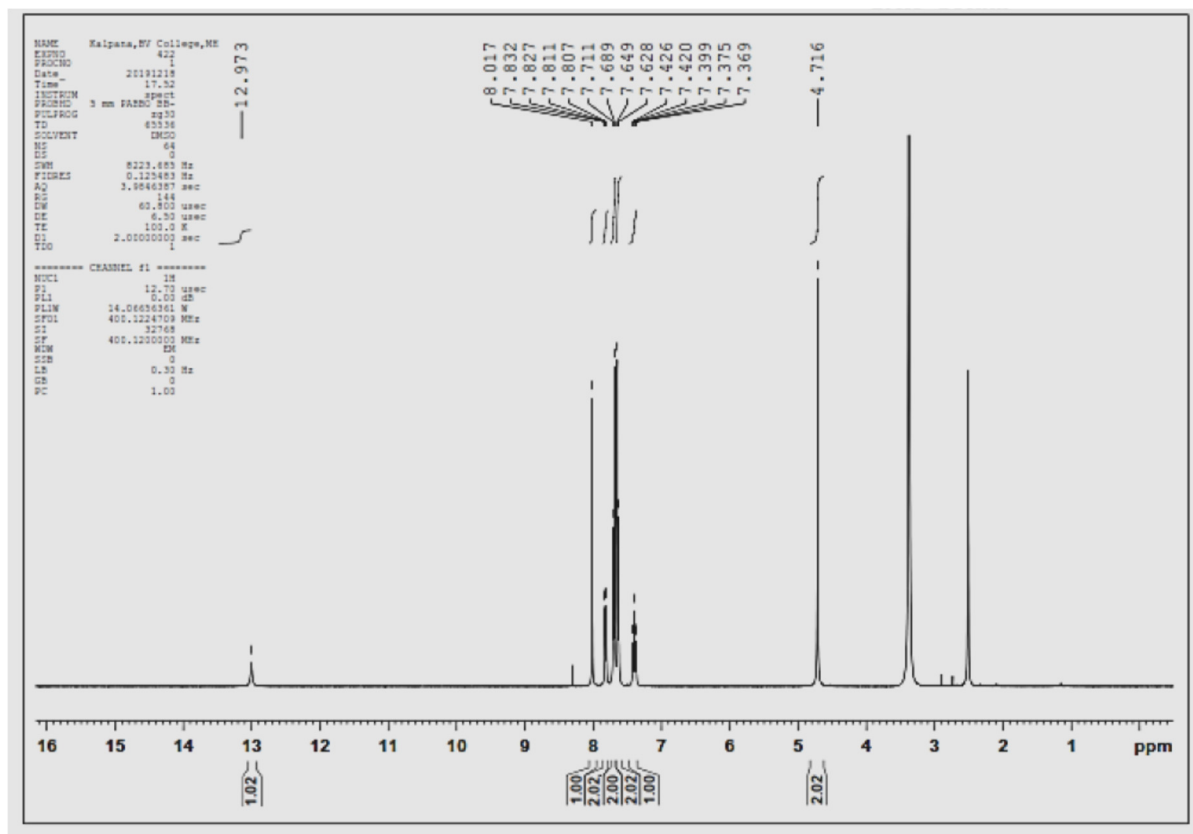

3.  $^{13}\text{C}$ NMR

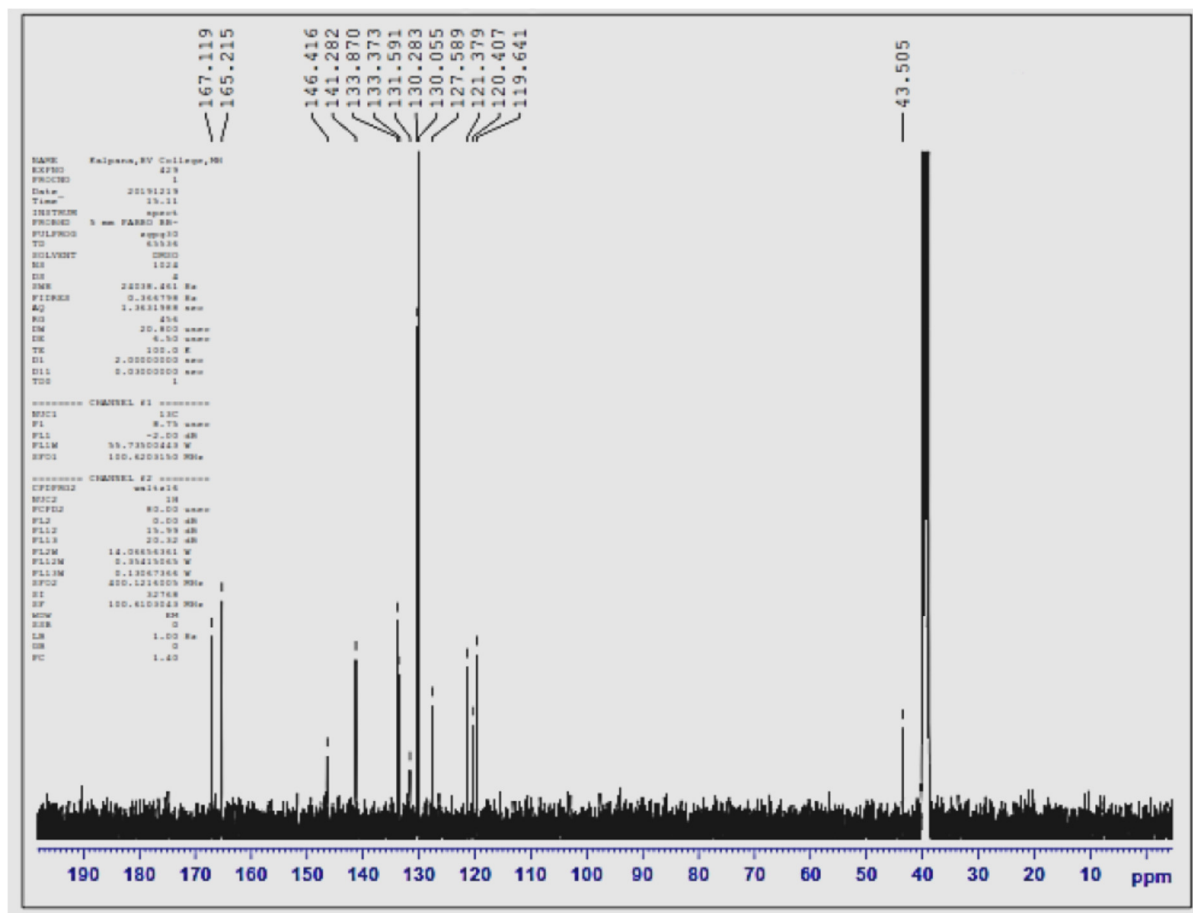

## 2. HPLC

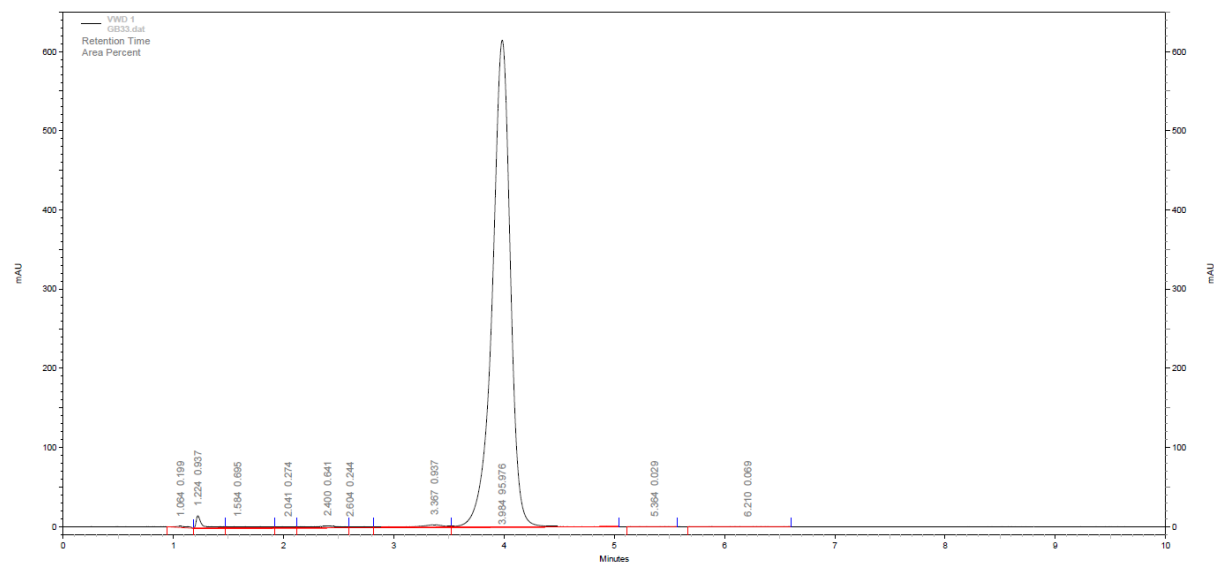

### 3. Mass

MS Spectrum

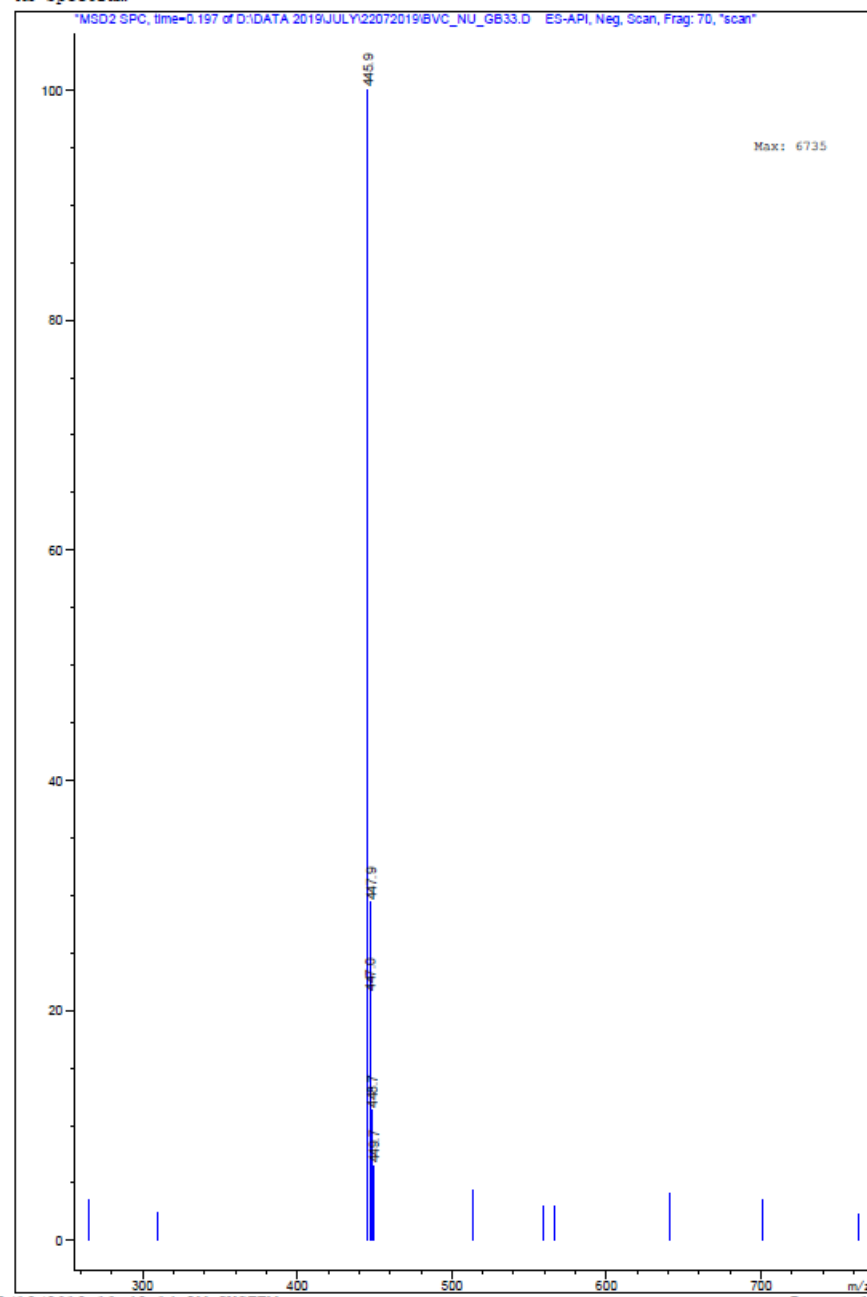



**N-(6-fluorobenzo[d]thiazol-2-yl)-2-(5-(4-fluorobenzylidene)-2,4-dioxothiazolidin-3-yl)acetamide (GB34)**

**1. FTIR**

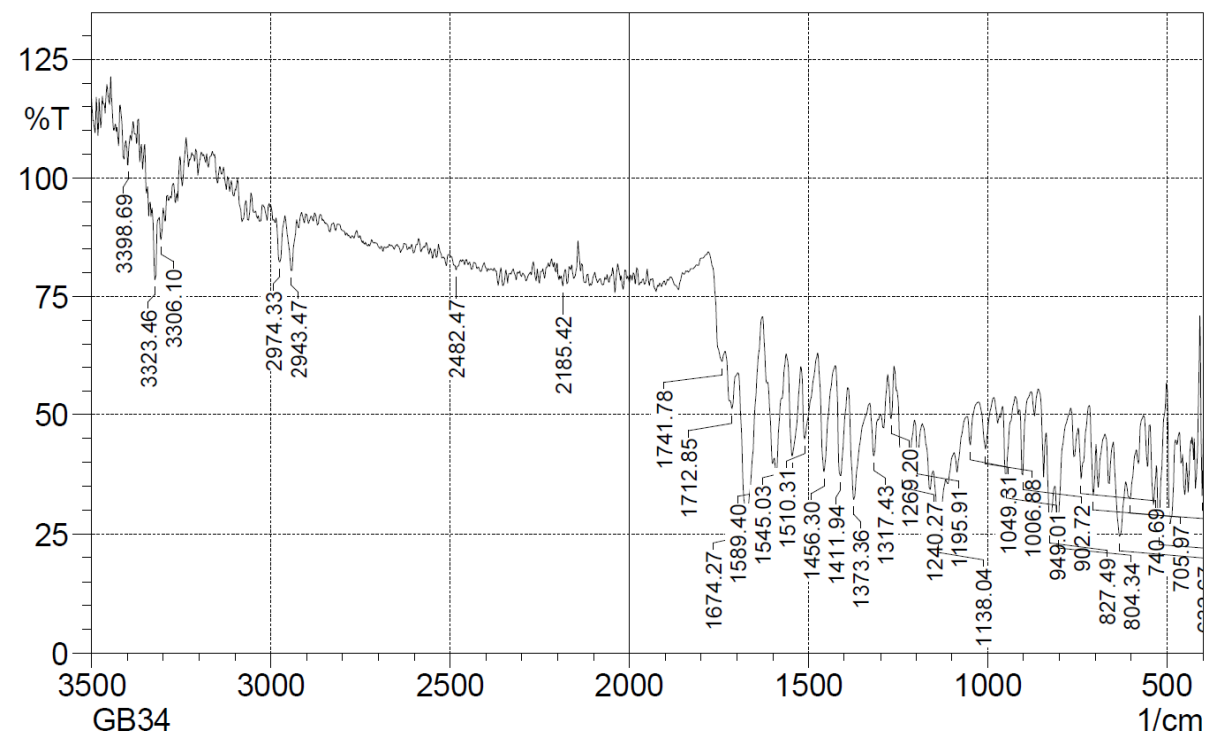

**2. <sup>1</sup>H NMR**

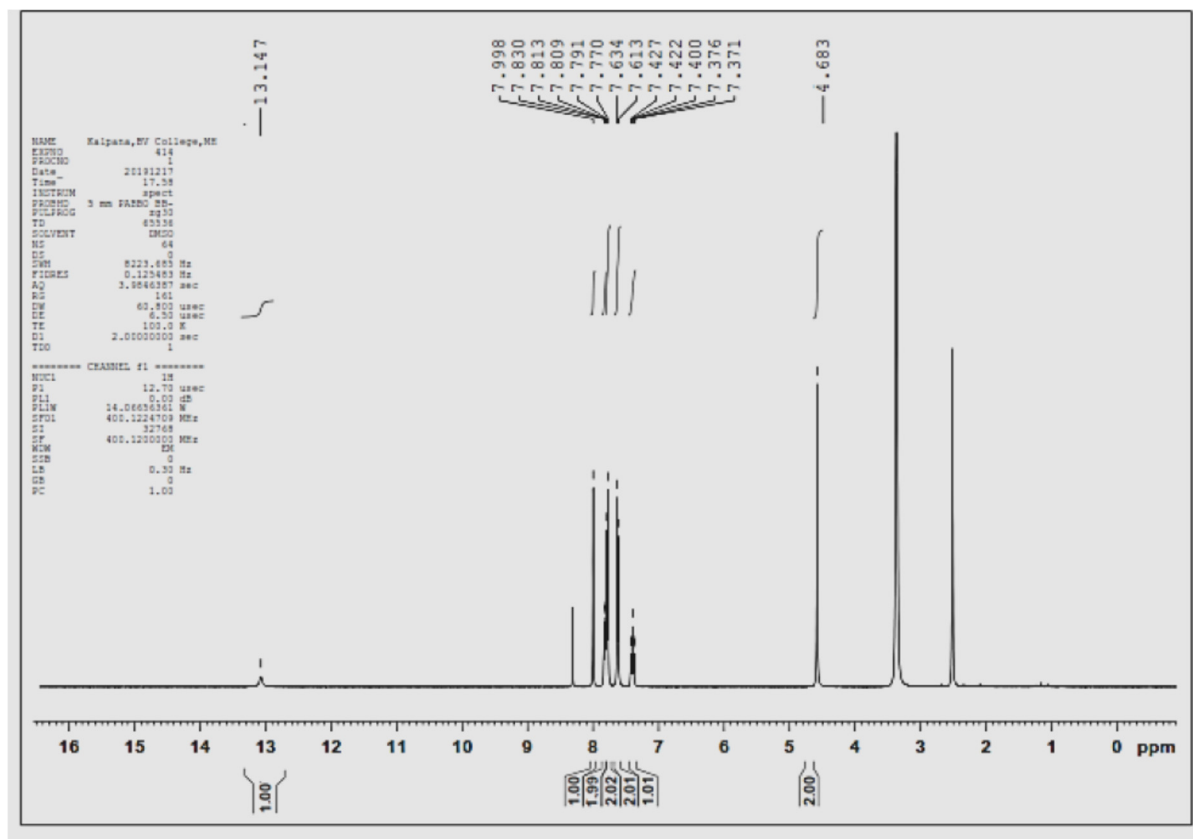

### 3. <sup>13</sup>CNMR

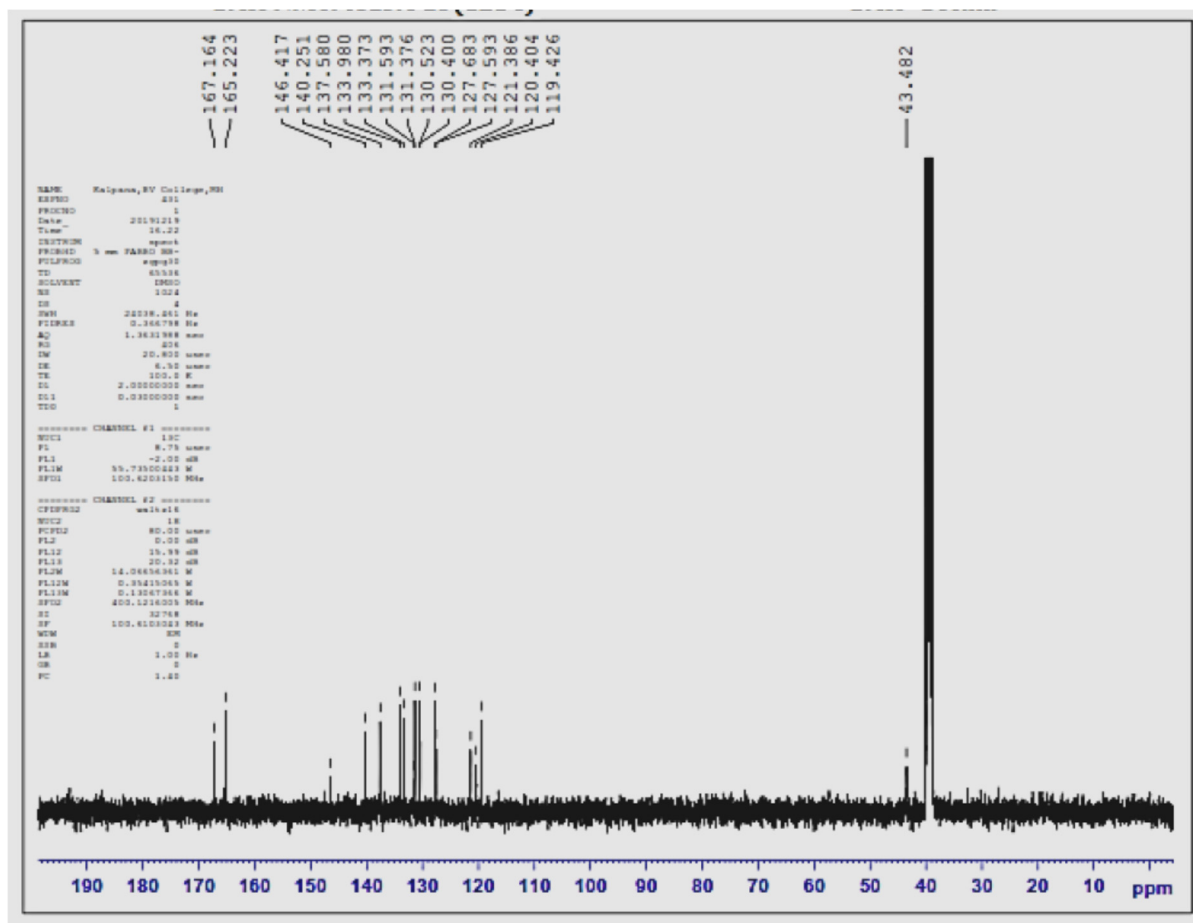

#### 4. HPLC

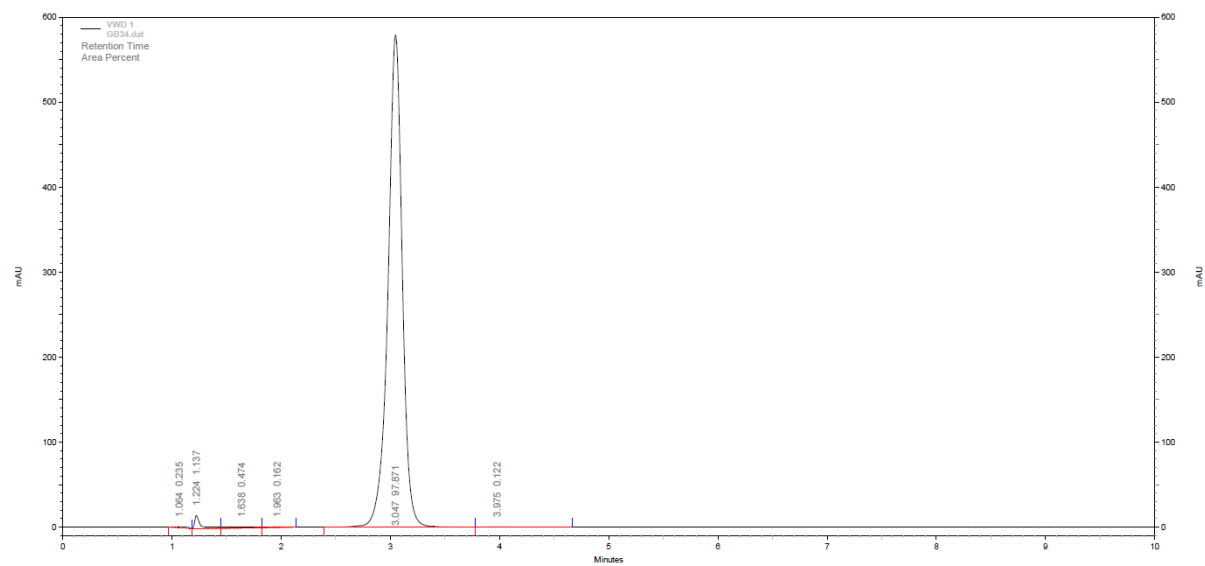

## 5. Mass

MS Spectrum

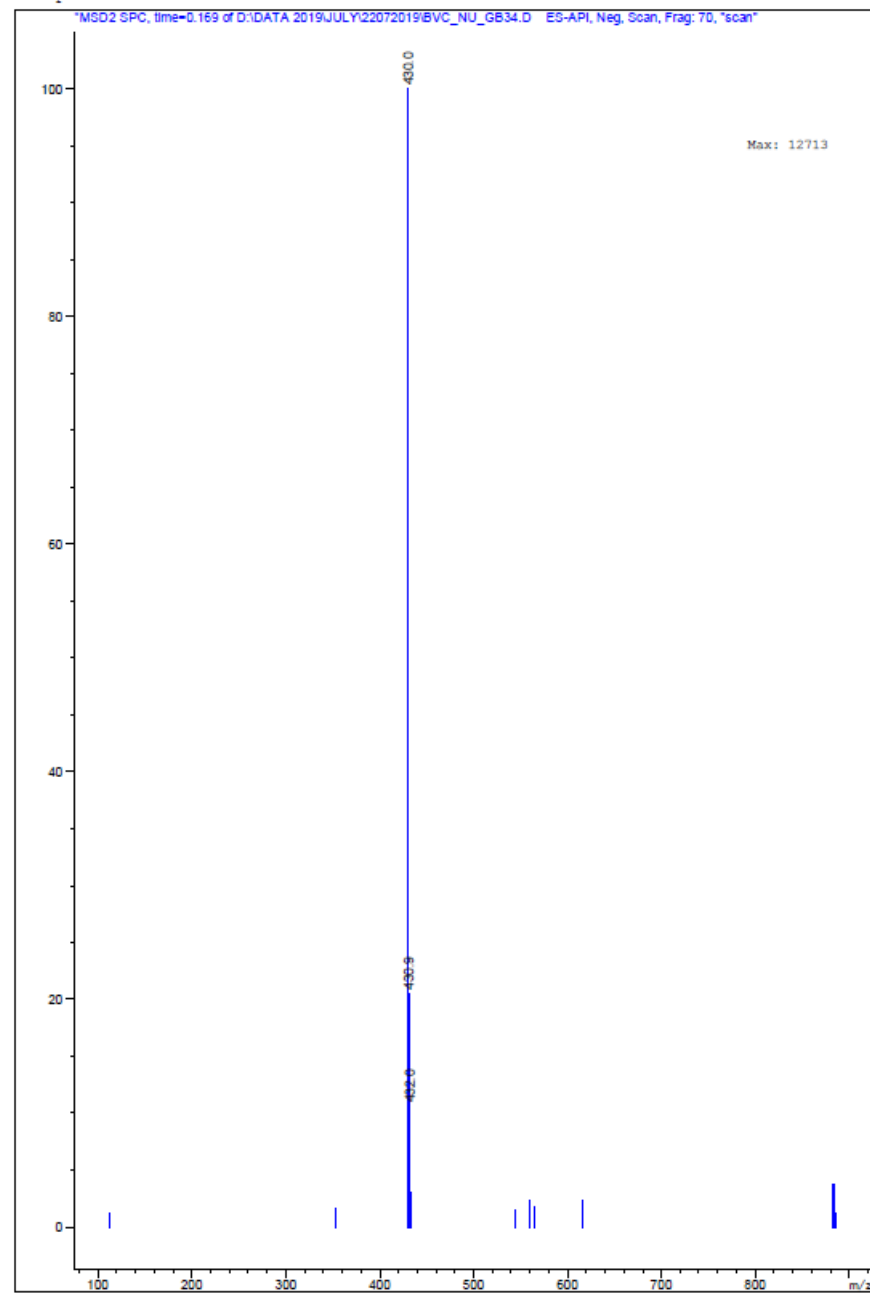

## 2-(5-(4-fluorobenzylidene)-2,4-dioxothiazolidin-3-yl)-N-(4-methoxybenzo[d]thiazol-2-yl)acetamide (GB35)

### 1. FTIR

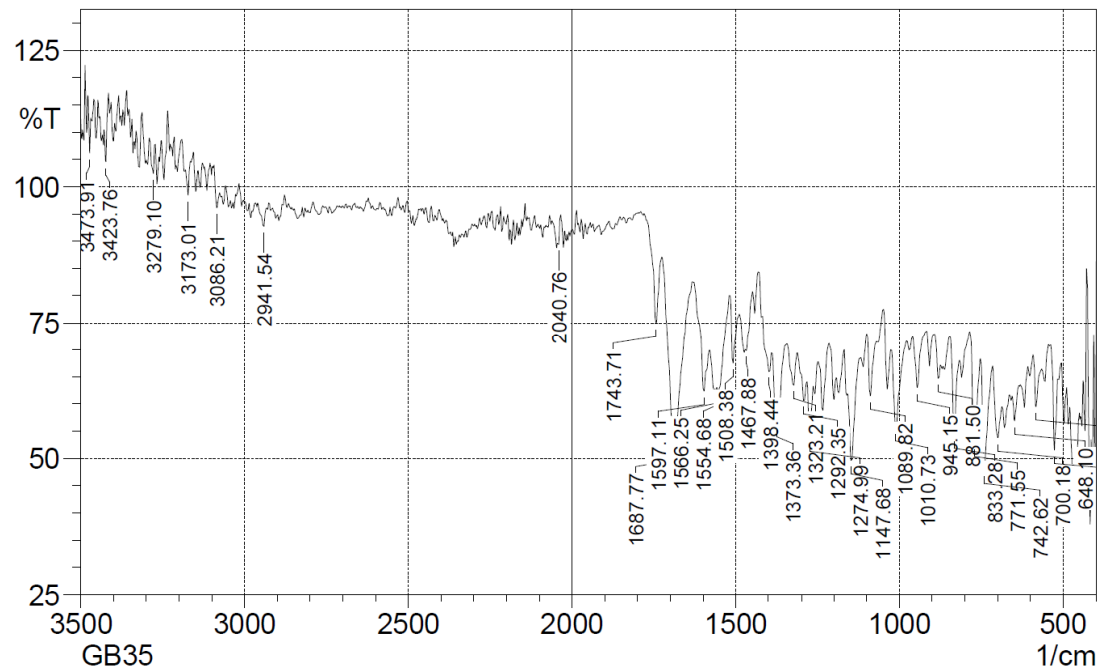

### 2. 1H-NMR

SAIFNM190323A-41(GB35)

SAIF Cochin

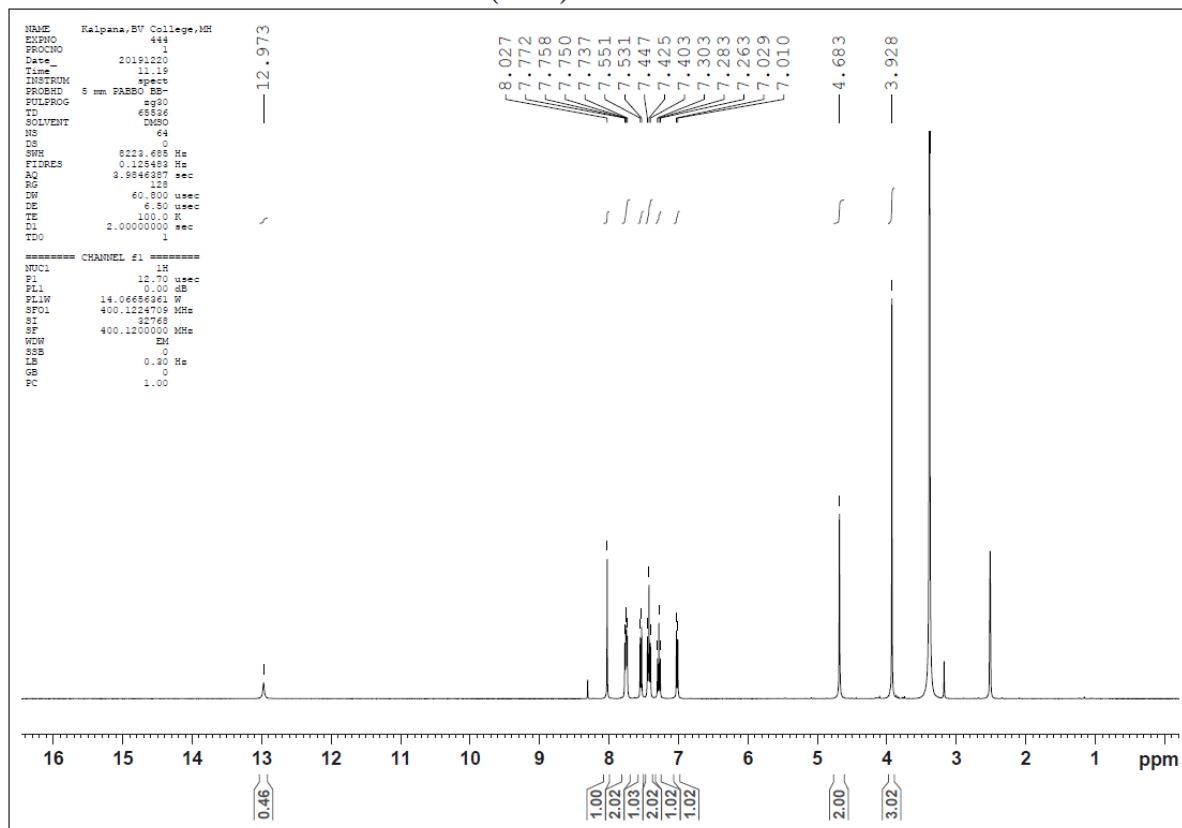

### 3. 13C-NMR

SAIFNM190323A-42(GB35)

SAIF Cochin

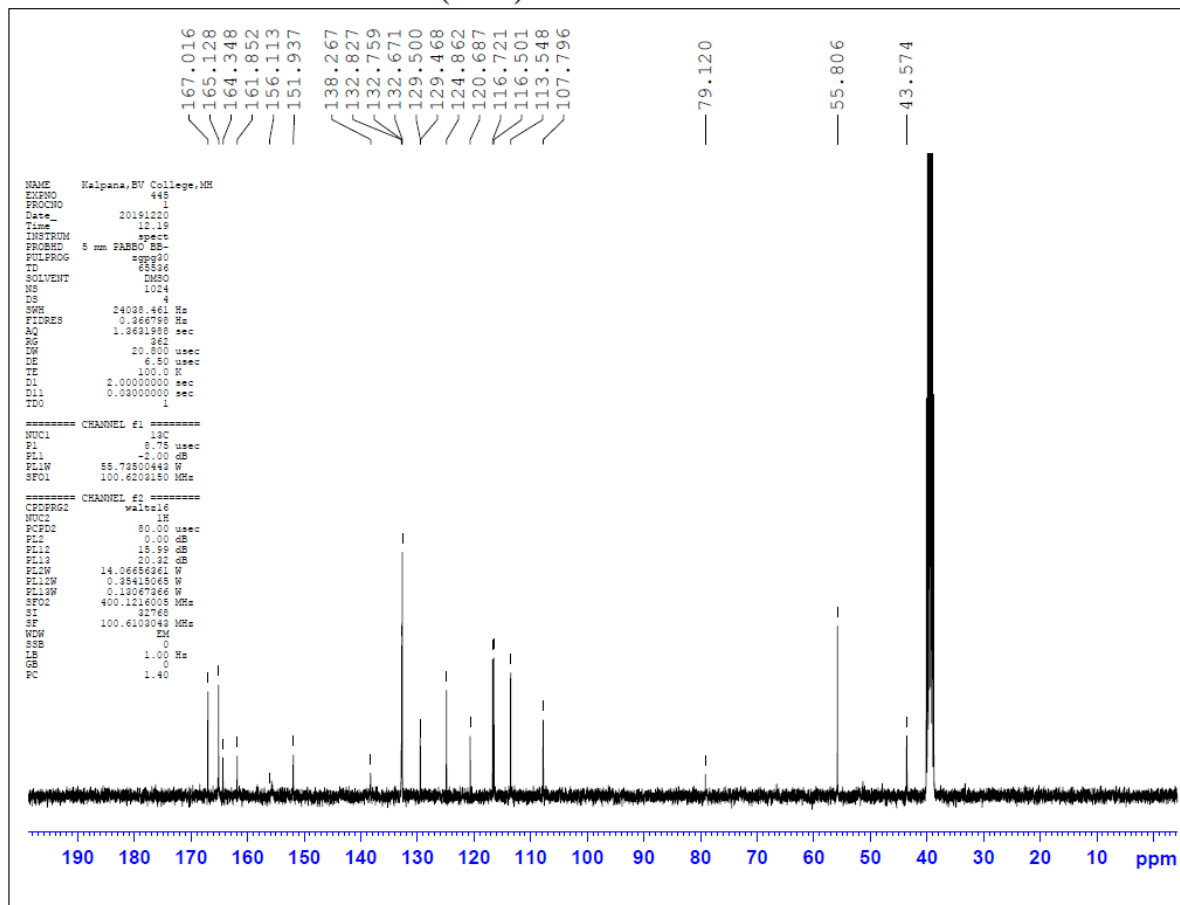

#### 4. HPLC



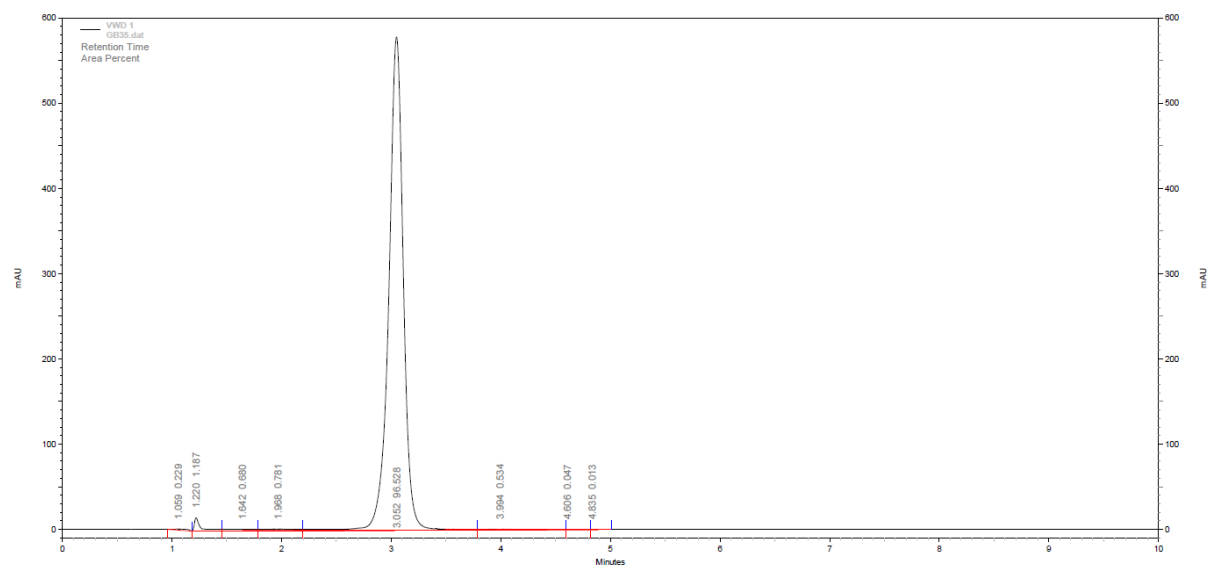

## 5. Mass

MS Spectrum

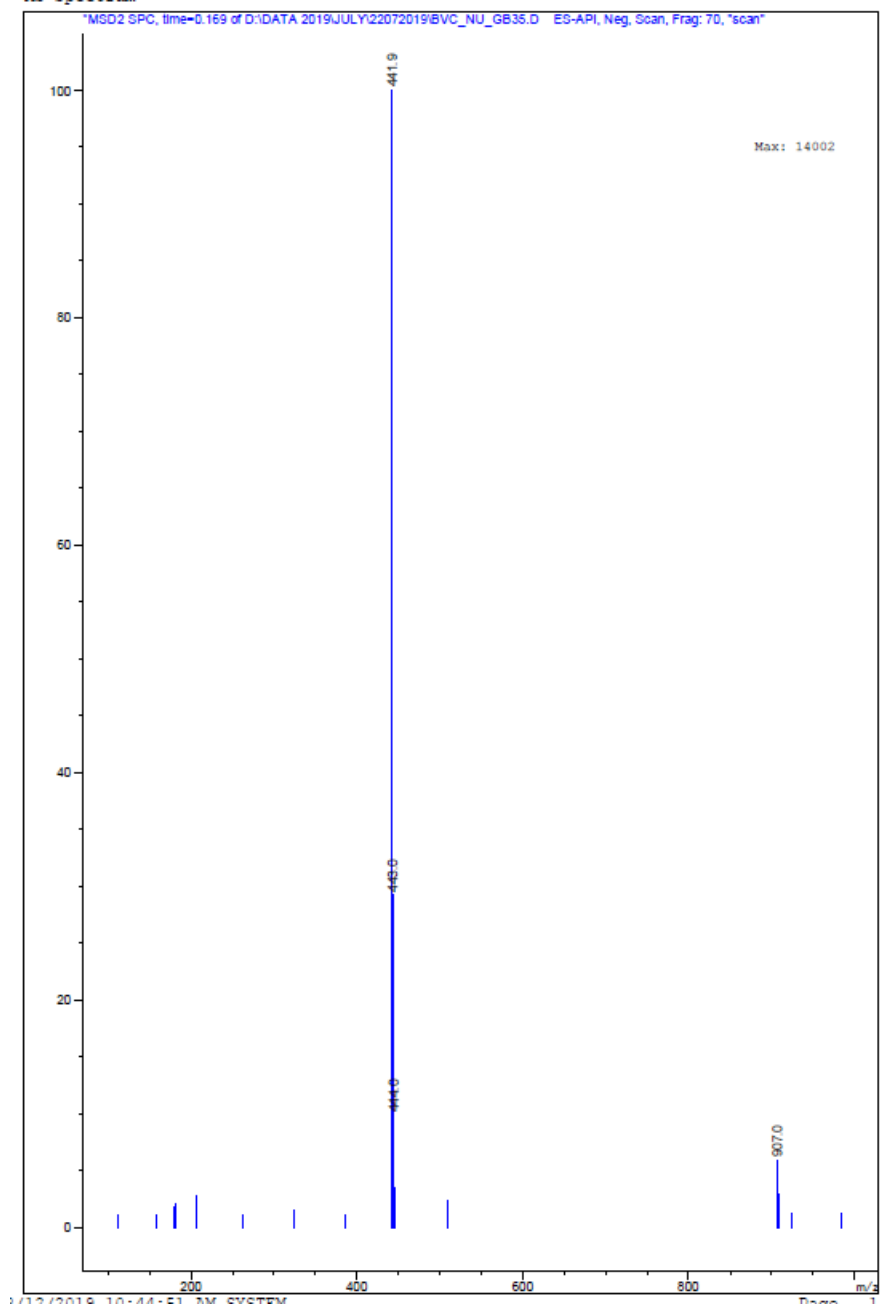

## 2-(5-benzylidene-2,4-dioxothiazolidin-3-yl)-N-(6-ethoxybenzo[d]thiazol-2-yl)acetamide (GB36)

### 1. FTIR

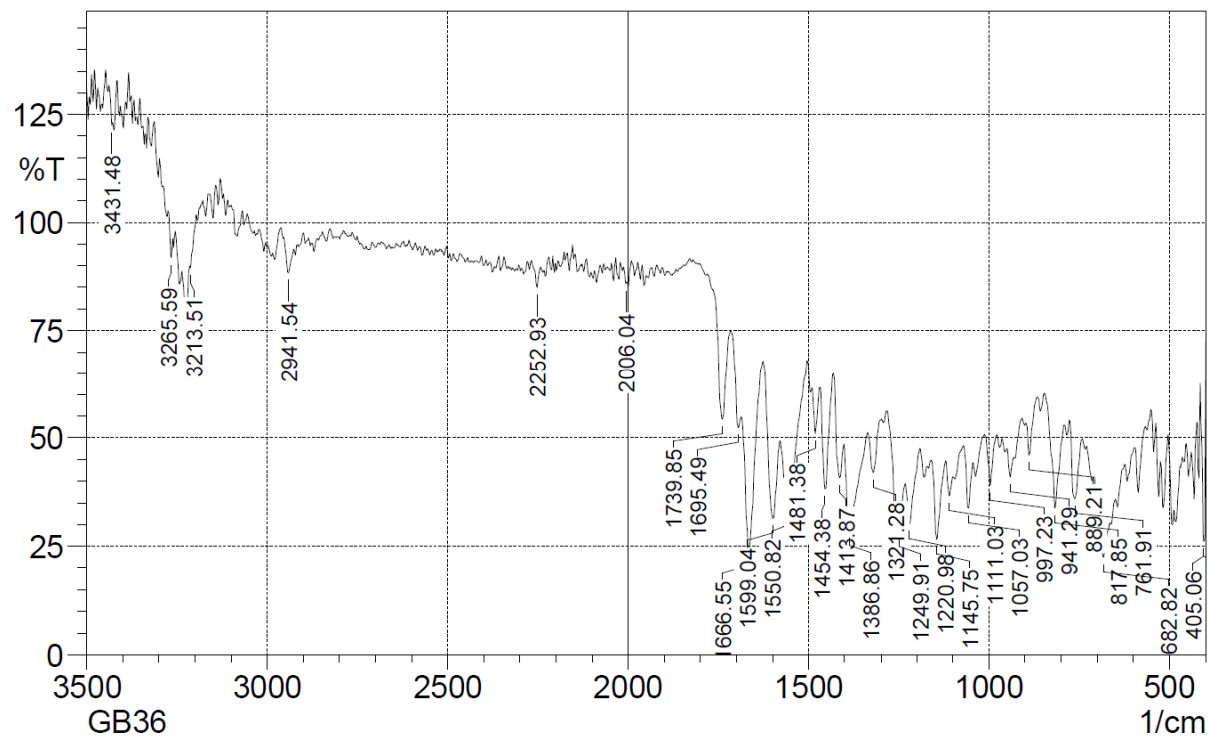

### 2. $^1\text{H}$ -NMR

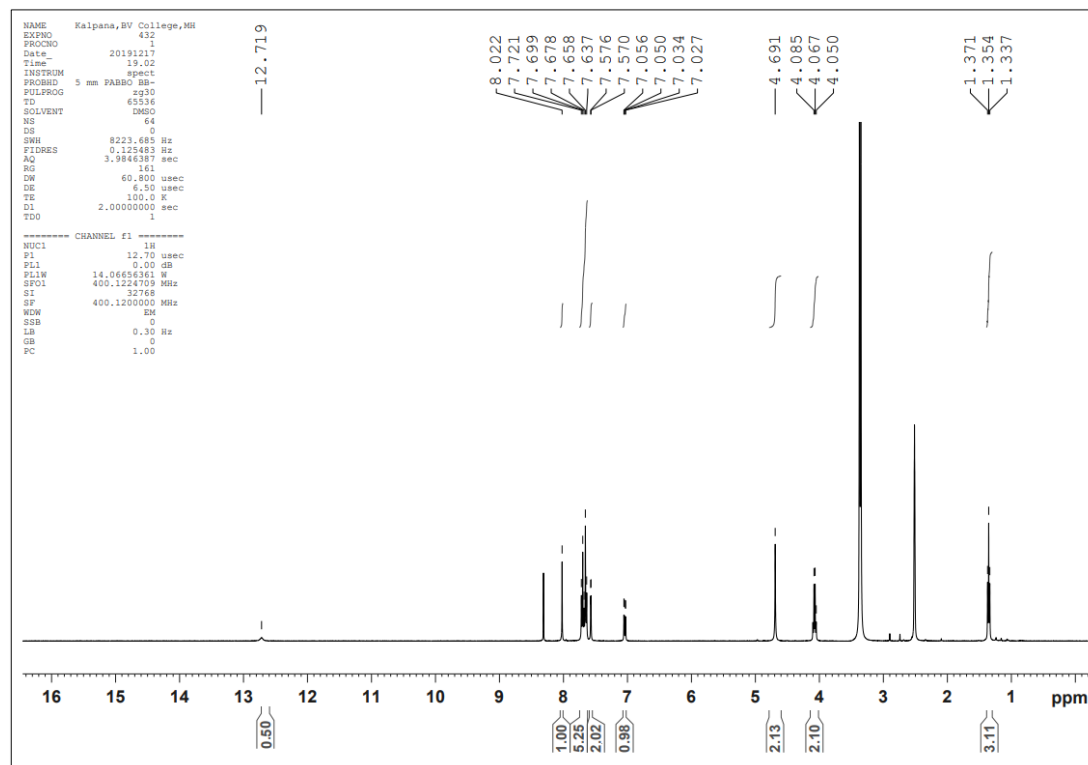

### 3. <sup>13</sup>C-NMR

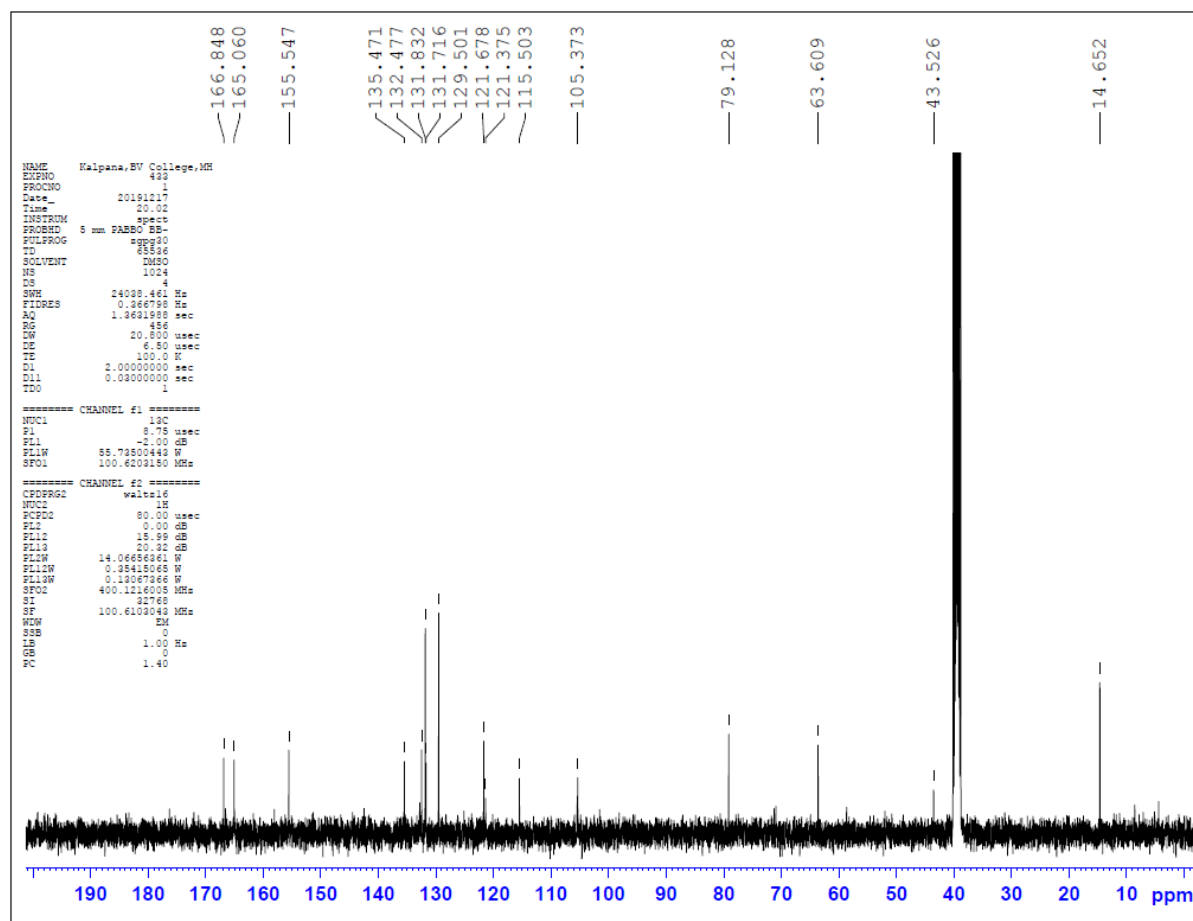

#### 4. HPLC

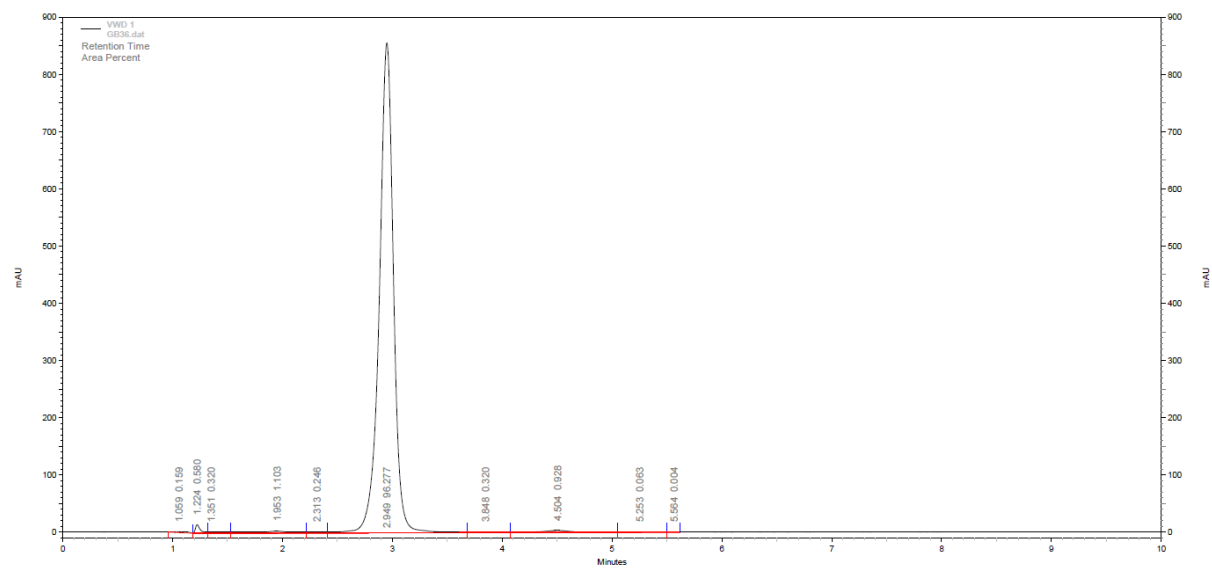

### 3. Mass

MS Spectrum

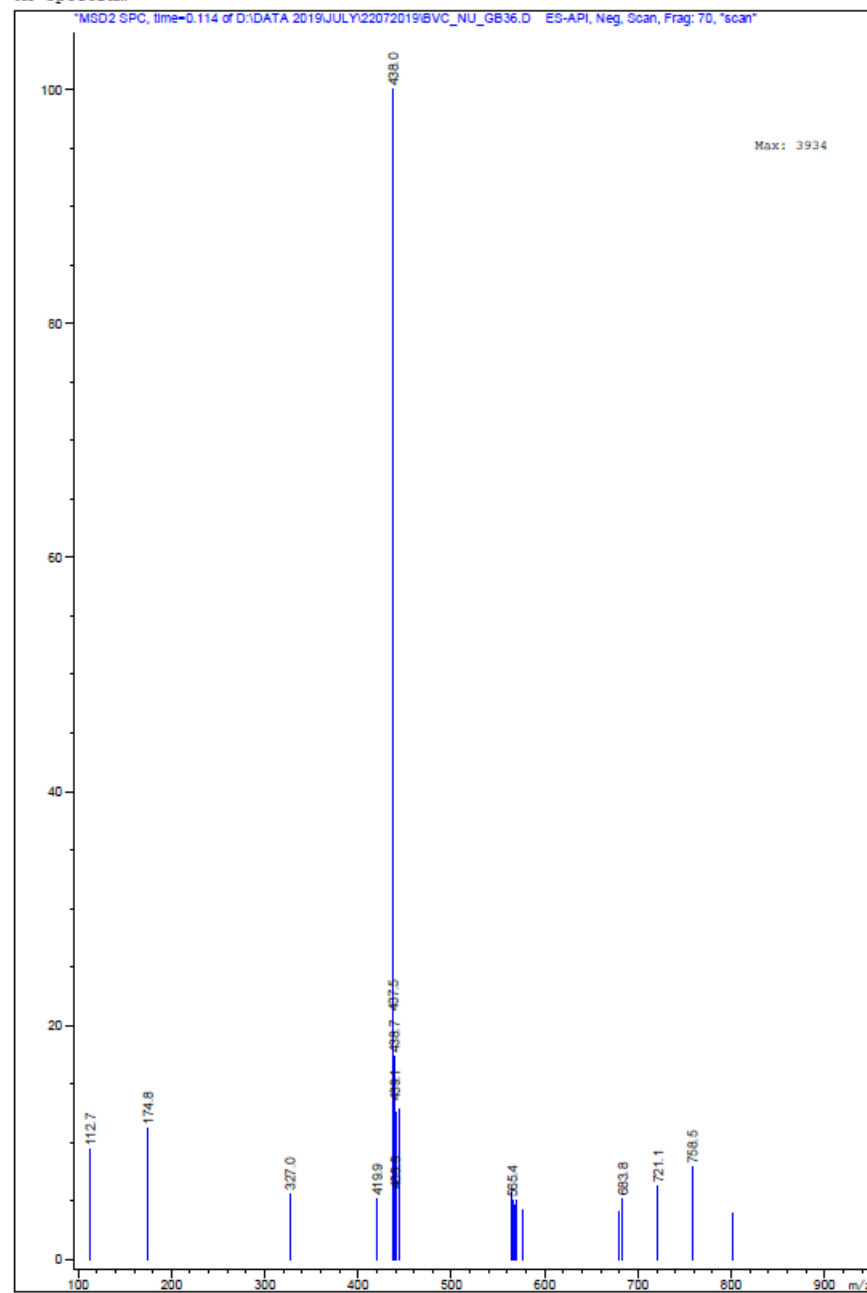

Supplement: s1 [file s1]
